# Supplementary material for: Yeast genetic interaction screen of human genes associated with amyotrophic lateral sclerosis: identification of MAP2K5 kinase as a potential drug target
Source: Genome Res. 2017 Sep;27(9):1487–500. doi: 10.1101/gr.211649.116 (PMC5580709; doi:10.1101/gr.211649.116)
Supplement: Supplemental Material [file supp_gr.211649.116_Supplemental_Table_S1.xlsx]

## Sheet: Raw data
Supplemental Table 1. Barcode counts of yeast deletions for the 20 OMIM ORFs
Query (OMIM)	Subject (yeast gene deletion)	Barcode counts	Normalized barcode counts	Z-score	Error rate	Min Z-score	Max Z-score
ABCB7	YOR081C	172	8.61481	25.2233	0.0961785	22.7974	27.6492
ABCB7	YOR091W	64	3.20551	20.6831	0.17635	17.0357	24.3306
ABCB7	YER187W	16	0.801378	19.5202	0.344473	12.796	26.2443
ABCB7	YAL039C	23	1.15198	19.1502	0.285061	13.6912	24.6092
ABCB7	YJL148W	57	2.85491	19.0968	0.197769	15.32	22.8735
ABCB7	YAL044C	35	1.75301	18.725	0.199555	14.9883	22.4616
ABCB7	YOR313C	63	3.15543	17.9199	0.20788	14.1947	21.645
ABCB7	YMR254C	25	1.25215	17.724	0.280471	12.7529	22.6951
ABCB7	YDR051C	103	5.15887	17.3885	0.164419	14.5295	20.2475
ABCB7	YDR204W	20	1.00172	16.8194	0.316374	11.4982	22.1406
ABCB7	YOR340C	43	2.1537	16.2399	0.216377	12.7259	19.7538
ABCB7	YMR196W	52	2.60448	15.7126	0.292151	11.1222	20.3031
ABCB7	YPL214C	23	1.15198	15.2835	0.330108	10.2383	20.3288
ABCB7	YIL086C	26	1.30224	15.1121	0.384612	9.29981	20.9244
ABCB7	YHR142W	19	0.951636	15.0439	0.361067	9.61202	20.4757
ABCB7	YEL067C	138	6.91189	15.0369	0.154457	12.7144	17.3595
ABCB7	YDR251W	31	1.55267	14.939	0.301868	10.4294	19.4486
ABCB7	YML017W	122	6.11051	14.562	0.251275	10.9029	18.2211
ABCB7	YDR092W	29	1.4525	14.4605	0.333955	9.63133	19.2896
ABCB7	YMR316C-A	28	1.40241	14.3956	0.279788	10.3679	18.4234
ABCB7	YDL085W	23	1.15198	14.361	0.347287	9.37358	19.3483
ABCB7	YBR037C	26	1.30224	14.1813	0.368164	8.96027	19.4024
ABCB7	YOR342C	125	6.26077	14.1085	0.192455	11.3933	16.8238
ABCB7	YCL026C	37	1.85319	13.9558	0.350729	9.06107	18.8505
ABCB7	YPL145C	33	1.65284	13.9299	0.32562	9.39407	18.4658
ABCB7	YJL058C	117	5.86008	13.86	0.204377	11.0273	16.6927
ABCB7	YER084W	10	0.500861	13.8417	0.552344	6.1963	21.487
ABCB7	YPL034W	77	3.85663	13.8318	0.234536	10.5878	17.0759
ABCB7	YMR150C	35	1.75301	13.7552	0.285909	9.82248	17.688
ABCB7	YJL092W	22	1.10189	13.7378	0.364152	8.73518	18.7405
ABCB7	YOR223W	27	1.35233	13.7182	0.386199	8.42022	19.0161
ABCB7	YHR041C	17	0.851464	13.5913	0.370457	8.55628	18.6262
ABCB7	YBR062C	33	1.65284	13.5579	0.309415	9.3629	17.753
ABCB7	YHR073W	21	1.05181	13.5099	0.34886	8.79681	18.2229
ABCB7	YOR343C	138	6.91189	13.367	0.209404	10.5679	16.1662
ABCB7	YJL206C-A	45	2.25388	13.341	0.328131	8.96342	17.7186
ABCB7	YDR291W	29	1.4525	13.16	0.313009	9.04082	17.2792
ABCB7	YEL012W	35	1.75301	13.1113	0.270101	9.56993	16.6527
ABCB7	YPL253C	15	0.751292	12.9782	0.41707	7.56536	18.391
ABCB7	YLR211C	49	2.45422	12.9342	0.265935	9.49454	16.3738
ABCB7	YJR036C	29	1.4525	12.8053	0.335297	8.51175	17.0989
ABCB7	YNL107W	16	0.801378	12.7377	0.415611	7.44376	18.0316
ABCB7	YOR215C	27	1.35233	12.6083	0.336816	8.36161	16.855
ABCB7	YAR042W	35	1.75301	12.5992	0.296662	8.86152	16.3369
ABCB7	YHL009C	17	0.851464	12.5555	0.375799	7.83718	17.2739
ABCB7	YMR048W	93	4.65801	12.5335	0.241465	9.50709	15.5599
ABCB7	YDR091C	10	0.500861	12.5293	0.463566	6.72113	18.3374
ABCB7	YEL062W	50	2.50431	12.5232	0.267108	9.17815	15.8682
ABCB7	YML096W	42	2.10362	12.5077	0.370014	7.8797	17.1358
ABCB7	YDL121C	87	4.35749	12.4766	0.264084	9.18175	15.7715
ABCB7	YBL037W	19	0.951636	12.3668	0.38689	7.58223	17.1514
ABCB7	YBR043C	40	2.00345	12.3558	0.320259	8.39875	16.3129
ABCB7	YIL093C	10	0.500861	12.3122	0.51711	5.94544	18.679
ABCB7	YJR052W	35	1.75301	12.3102	0.328916	8.2612	16.3593
ABCB7	YOR068C	34	1.70293	12.2691	0.366485	7.77263	16.7655
ABCB7	YPL071C	16	0.801378	12.2385	0.386992	7.5023	16.9747
ABCB7	YOR107W	57	2.85491	12.2279	0.325182	8.25159	16.2042
ABCB7	YLR099C	42	2.10362	12.0829	0.305505	8.39154	15.7743
ABCB7	YOR238W	22	1.10189	12.0424	0.371409	7.56976	16.5151
ABCB7	YNL316C	39	1.95336	12.0225	0.332721	8.02239	16.0227
ABCB7	YLR083C	29	1.4525	11.9876	0.418696	6.96842	17.0067
ABCB7	YMR304C-A	94	4.7081	11.9159	0.260973	8.80616	15.0256
ABCB7	YJL122W	86	4.30741	11.9144	0.23899	9.06702	14.7619
ABCB7	YHR018C	55	2.75474	11.7643	0.247782	8.84931	14.6793
ABCB7	YOL075C	24	1.20207	11.7032	0.332758	7.80889	15.5976
ABCB7	YCL008C	23	1.15198	11.6264	0.381509	7.1908	16.0619
ABCB7	YHR129C	16	0.801378	11.6199	0.412743	6.8239	16.416
ABCB7	YOL062C	47	2.35405	11.5891	0.30067	8.10461	15.0736
ABCB7	YOL030W	43	2.1537	11.5603	0.352658	7.48345	15.6371
ABCB7	YER140W	40	2.00345	11.4817	0.375972	7.16491	15.7985
ABCB7	YPL154C	44	2.20379	11.4477	0.364832	7.27119	15.6241
ABCB7	YHR180W	65	3.2556	11.4308	0.354893	7.37411	15.4875
ABCB7	YDR108W	48	2.40413	11.4287	0.364001	7.26864	15.5887
ABCB7	YPR003C	34	1.70293	11.3704	0.373527	7.12323	15.6175
ABCB7	YDL012C	87	4.35749	11.3339	0.249842	8.50221	14.1656
ABCB7	YOR275C	47	2.35405	11.3128	0.339352	7.47375	15.1518
ABCB7	YER062C	25	1.25215	11.3079	0.401356	6.76937	15.8463
ABCB7	YJL153C	32	1.60276	11.2686	0.358334	7.23068	15.3065
ABCB7	YDR009W	73	3.65629	11.2609	0.304984	7.82649	14.6953
ABCB7	YHL014C	184	9.21585	11.2322	0.215835	8.8079	13.6565
ABCB7	YML106W	28	1.40241	11.2297	0.403334	6.70038	15.759
ABCB7	YJL110C	108	5.4093	11.2147	0.26752	8.21451	14.2148
ABCB7	YOR032C	26	1.30224	11.1985	0.348313	7.29791	15.0991
ABCB7	YNL235C	29	1.4525	11.1914	0.350373	7.27026	15.1126
ABCB7	YEL052W	38	1.90327	11.1733	0.428471	6.38584	15.9607
ABCB7	YHL010C	41	2.05353	11.1673	0.359931	7.14783	15.1867
ABCB7	YER041W	22	1.10189	11.1515	0.384779	6.86061	15.4423
ABCB7	YBL098W	66	3.30568	11.1469	0.269327	8.14472	14.149
ABCB7	YHR176W	14	0.701206	11.0879	0.440116	6.20792	15.9678
ABCB7	YJR094C	84	4.20723	11.0179	0.269952	8.04361	13.9922
ABCB7	YDR077W	49	2.45422	10.9332	0.358843	7.00993	14.8566
ABCB7	YDL034W	23	1.15198	10.903	0.417138	6.35492	15.451
ABCB7	YJR110W	62	3.10534	10.8871	0.298674	7.6354	14.1388
ABCB7	YPL144W	30	1.50258	10.8443	0.378523	6.73951	14.9492
ABCB7	YOR045W	34	1.70293	10.8317	0.424449	6.23421	15.4292
ABCB7	YOR171C	12	0.601034	10.6891	0.527389	5.0518	16.3265
ABCB7	YLR138W	17	0.851464	10.5652	0.460493	5.70002	15.4304
ABCB7	YCL051W	23	1.15198	10.5625	0.443191	5.88129	15.2437
ABCB7	YOR386W	18	0.90155	10.5435	0.51868	5.07478	16.0122
ABCB7	YJR102C	18	0.90155	10.5354	0.430097	6.00414	15.0666
ABCB7	YOL060C	11	0.550947	10.5324	0.540084	4.84404	16.2209
ABCB7	YDL027C	19	0.951636	10.4845	0.437451	5.89804	15.0709
ABCB7	YOL006C	17	0.851464	10.4775	0.424989	6.02467	14.9303
ABCB7	YJR058C	28	1.40241	10.457	0.501761	5.21011	15.704
ABCB7	YDL078C	28	1.40241	10.3969	0.457291	5.64251	15.1514
ABCB7	YER042W	22	1.10189	10.2932	0.457656	5.58248	15.004
ABCB7	YLR030W	43	2.1537	10.2476	0.432285	5.81771	14.6775
ABCB7	YER089C	45	2.25388	10.2428	0.414886	5.9932	14.4924
ABCB7	YMR017W	27	1.35233	10.2263	0.395382	6.18298	14.2696
ABCB7	YBL022C	14	0.701206	10.2002	0.499199	5.10825	15.2921
ABCB7	YBR058C	30	1.50258	10.1924	0.354426	6.57998	13.8049
ABCB7	YBR205W	77	3.85663	10.1867	0.378315	6.33292	14.0405
ABCB7	YER124C	24	1.20207	10.1721	0.465795	5.43399	14.9102
ABCB7	YJL101C	47	2.35405	10.1588	0.314229	6.96663	13.351
ABCB7	YOR021C	44	2.20379	10.1524	0.377996	6.31484	13.99
ABCB7	YLL009C	23	1.15198	10.1395	0.414778	5.93386	14.3451
ABCB7	YPL105C	20	1.00172	10.1067	0.500387	5.04942	15.1639
ABCB7	YIL035C	15	0.751292	10.0984	0.441652	5.63844	14.5584
ABCB7	YMR187C	57	2.85491	10.0906	0.382256	6.23338	13.9477
ABCB7	YOR162C	14	0.701206	10.0583	0.476375	5.26677	14.8498
ABCB7	YHL020C	10	0.500861	10.0565	0.587184	4.15149	15.9615
ABCB7	YBR137W	29	1.4525	10.0275	0.439467	5.62077	14.4343
ABCB7	YDR203W	27	1.35233	10.0275	0.338128	6.63694	13.4181
ABCB7	YNL121C	14	0.701206	10.0232	0.470888	5.30342	14.7431
ABCB7	YDL215C	91	4.55784	9.97278	0.297848	7.00241	12.9432
ABCB7	YNL291C	18	0.90155	9.96632	0.485245	5.13021	14.8024
ABCB7	YHR155W	29	1.4525	9.92552	0.481972	5.14169	14.7093
ABCB7	YER155C	13	0.65112	9.89144	0.570597	4.24742	15.5355
ABCB7	YLR225C	42	2.10362	9.84426	0.353978	6.3596	13.3289
ABCB7	YEL056W	43	2.1537	9.8378	0.373128	6.16704	13.5086
ABCB7	YMR106C	36	1.8031	9.82614	0.367062	6.21933	13.4329
ABCB7	YOR123C	7	0.350603	9.7511	0.592809	3.97055	15.5316
ABCB7	YOR088W	39	1.95336	9.72473	0.395407	5.87951	13.5699
ABCB7	YOR318C	42	2.10362	9.7232	0.420685	5.6328	13.8136
ABCB7	YNL224C	21	1.05181	9.6852	0.486181	4.97644	14.394
ABCB7	YOR052C	62	3.10534	9.67456	0.305255	6.72136	12.6278
ABCB7	YDR326C	125	6.26077	9.67232	0.172746	8.00147	11.3432
ABCB7	YOR264W	29	1.4525	9.65925	0.491556	4.91119	14.4073
ABCB7	YDR275W	11	0.550947	9.63822	0.609393	3.76476	15.5117
ABCB7	YOR101W	16	0.801378	9.62425	0.561233	4.22281	15.0257
ABCB7	YHL027W	58	2.905	9.60349	0.343176	6.30781	12.8992
ABCB7	YIL095W	43	2.1537	9.5656	0.346052	6.2554	12.8758
ABCB7	YHR153C	29	1.4525	9.50614	0.399118	5.71207	13.3002
ABCB7	YIL170W	90	4.50775	9.45428	0.373214	5.92582	12.9827
ABCB7	YMR225C	25	1.25215	9.42198	0.407658	5.58104	13.2629
ABCB7	YIL098C	76	3.80655	9.42031	0.305325	6.54405	12.2966
ABCB7	YBR214W	15	0.751292	9.37022	0.492553	4.75489	13.9855
ABCB7	YER066W	65	3.2556	9.32885	0.334643	6.20701	12.4507
ABCB7	YIL029C	26	1.30224	9.29914	0.45132	5.10226	13.496
ABCB7	YOR239W	19	0.951636	9.21941	0.425978	5.29214	13.1467
ABCB7	YCR016W	20	1.00172	9.20724	0.502429	4.58125	13.8332
ABCB7	YNL051W	8	0.400689	9.16523	0.662764	3.09085	15.2396
ABCB7	YAL067C	57	2.85491	9.15371	0.393249	5.55402	12.7534
ABCB7	YNL075W	15	0.751292	9.13358	0.455785	4.97063	13.2965
ABCB7	YEL071W	35	1.75301	9.0717	0.452876	4.96335	13.1801
ABCB7	YJL004C	25	1.25215	9.04939	0.509108	4.44228	13.6565
ABCB7	YER138C-A	15	0.751292	9.01581	0.557982	3.98515	14.0465
ABCB7	YMR098C	9	0.450775	9.01204	0.584577	3.74381	14.2803
ABCB7	YPL055C	8	0.400689	9.00848	0.641619	3.22847	14.7885
ABCB7	YCR004C	42	2.10362	9.00356	0.45629	4.89532	13.1118
ABCB7	YBR065C	67	3.35577	8.94388	0.377182	5.57041	12.3173
ABCB7	YPL109C	22	1.10189	8.90732	0.518101	4.29243	13.5222
ABCB7	YOR069W	20	1.00172	8.88223	0.49823	4.45683	13.3076
ABCB7	YBR213W	10	0.500861	8.87412	0.63274	3.25911	14.4891
ABCB7	YBL091C	35	1.75301	8.86499	0.394152	5.37084	12.3591
ABCB7	YOR167C	70	3.50603	8.85591	0.412764	5.20051	12.5113
ABCB7	YML011C	70	3.50603	8.82836	0.42526	5.07401	12.5827
ABCB7	YHL030W	31	1.55267	8.78543	0.4085	5.19658	12.3743
ABCB7	YNL289W	31	1.55267	8.72172	0.428546	4.98406	12.4594
ABCB7	YEL005C	14	0.701206	8.70353	0.52438	4.13957	13.2675
ABCB7	YMR157C	42	2.10362	8.69965	0.411174	5.12258	12.2767
ABCB7	YOR320C	63	3.15543	8.69782	0.390214	5.30381	12.0918
ABCB7	YDR321W	23	1.15198	8.69201	0.423189	5.01365	12.3704
ABCB7	YMR234W	58	2.905	8.67764	0.374618	5.42684	11.9284
ABCB7	YJR126C	32	1.60276	8.62873	0.543473	3.93924	13.3182
ABCB7	YLR015W	31	1.55267	8.55357	0.38178	5.28798	11.8192
ABCB7	YCL046W	9	0.450775	8.5419	0.533065	3.98851	13.0953
ABCB7	YHR077C	24	1.20207	8.47992	0.530628	3.98023	12.9796
ABCB7	YOL013C	41	2.05353	8.41364	0.396874	5.07449	11.7528
ABCB7	YML111W	39	1.95336	8.40673	0.528484	3.9639	12.8495
ABCB7	YJR134C	84	4.20723	8.37328	0.265039	6.15404	10.5925
ABCB7	YJL216C	66	3.30568	8.36699	0.322544	5.66826	11.0657
ABCB7	YNL242W	82	4.10706	8.35364	0.338016	5.52998	11.1773
ABCB7	YNL119W	11	0.550947	8.34602	0.563558	3.64255	13.0495
ABCB7	YLL044W	39	1.95336	8.34081	0.474278	4.38495	12.2967
ABCB7	YJR073C	18	0.90155	8.31898	0.543854	3.79467	12.8433
ABCB7	YPL001W	9	0.450775	8.31472	0.525825	3.94263	12.6868
ABCB7	YLL052C	29	1.4525	8.31431	0.519962	3.99119	12.6374
ABCB7	YML068W	40	2.00345	8.3127	0.388825	5.08051	11.5449
ABCB7	YHR028C	177	8.86524	8.31211	0.250545	6.22955	10.3947
ABCB7	YBL069W	49	2.45422	8.31151	0.44653	4.60017	12.0228
ABCB7	YEL042W	34	1.70293	8.30736	0.44508	4.60992	12.0048
ABCB7	YML058W	45	2.25388	8.29191	0.402982	4.95042	11.6334
ABCB7	YMR258C	47	2.35405	8.22261	0.410087	4.85063	11.5946
ABCB7	YBR040W	23	1.15198	8.19374	0.502709	4.07468	12.3128
ABCB7	YNL194C	42	2.10362	8.18857	0.472904	4.31616	12.061
ABCB7	YHL040C	24	1.20207	8.18675	0.515061	3.97007	12.4034
ABCB7	YLR020C	72	3.6062	8.14568	0.342566	5.35525	10.9361
ABCB7	YOR341W	17	0.851464	8.14076	0.407237	4.82554	11.456
ABCB7	YMR111C	44	2.20379	8.13532	0.479512	4.23433	12.0363
ABCB7	YOR082C	34	1.70293	8.08067	0.531957	3.7821	12.3792
ABCB7	YOR029W	56	2.80482	8.07998	0.458274	4.37714	11.7828
ABCB7	YOR315W	18	0.90155	8.04157	0.432391	4.56447	11.5187
ABCB7	YBR020W	25	1.25215	8.03376	0.541685	3.68199	12.3855
ABCB7	YMR109W	57	2.85491	8.02305	0.455233	4.37069	11.6754
ABCB7	YOR274W	38	1.90327	8.0086	0.592305	3.26506	12.7521
ABCB7	YER092W	22	1.10189	8.00114	0.501954	3.98493	12.0173
ABCB7	YNL274C	373	18.6821	7.99474	0.240462	6.07231	9.91717
ABCB7	YER031C	48	2.40413	7.98506	0.429215	4.55776	11.4124
ABCB7	YDL149W	85	4.25732	7.85924	0.449029	4.33021	11.3883
ABCB7	YDL091C	19	0.951636	7.85907	0.51776	3.78996	11.9282
ABCB7	YMR167W	27	1.35233	7.82786	0.534333	3.64518	12.0105
ABCB7	YMR214W	18	0.90155	7.79338	0.534744	3.62592	11.9608
ABCB7	YMR306W	55	2.75474	7.77189	0.485146	4.00138	11.5424
ABCB7	YNL067W	15	0.751292	7.76373	0.641934	2.77993	12.7475
ABCB7	YHR047C	34	1.70293	7.75964	0.328325	5.21196	10.3073
ABCB7	YOR125C	37	1.85319	7.74071	0.388911	4.73027	10.7512
ABCB7	YLR110C	67	3.35577	7.73402	0.408389	4.57553	10.8925
ABCB7	YDL226C	29	1.4525	7.73186	0.464202	4.14272	11.321
ABCB7	YOR157C	12	0.601034	7.73095	0.631591	2.84815	12.6137
ABCB7	YDL122W	30	1.50258	7.69245	0.494553	3.88813	11.4968
ABCB7	YMR124W	21	1.05181	7.6879	0.473845	4.04503	11.3308
ABCB7	YOR326W	10	0.500861	7.66562	0.675083	2.49069	12.8405
ABCB7	YJL214W	19	0.951636	7.64697	0.545998	3.47174	11.8222
ABCB7	YNL098C	25	1.25215	7.64663	0.527023	3.61668	11.6766
ABCB7	YER037W	16	0.801378	7.63028	0.46956	4.04741	11.2132
ABCB7	YML074C	43	2.1537	7.61781	0.335107	5.06503	10.1706
ABCB7	YOR188W	62	3.10534	7.60539	0.477749	3.97192	11.2389
ABCB7	YOR079C	32	1.60276	7.59337	0.497451	3.81604	11.3707
ABCB7	YDR304C	25	1.25215	7.57048	0.544448	3.44875	11.6922
ABCB7	YAR020C	23	1.15198	7.53844	0.526925	3.56625	11.5106
ABCB7	YDR142C	9	0.450775	7.52534	0.507819	3.70383	11.3469
ABCB7	YIL131C	32	1.60276	7.50543	0.501498	3.74147	11.2694
ABCB7	YMR009W	29	1.4525	7.47162	0.54377	3.40878	11.5345
ABCB7	YOR247W	25	1.25215	7.46673	0.516086	3.61326	11.3202
ABCB7	YDL118W	66	3.30568	7.44815	0.376738	4.64215	10.2541
ABCB7	YDR024W	16	0.801378	7.42284	0.570946	3.1848	11.6609
ABCB7	YNL106C	44	2.20379	7.41626	0.415709	4.33325	10.4993
ABCB7	YIL066C	134	6.71154	7.41097	0.383306	4.5703	10.2516
ABCB7	YER184C	33	1.65284	7.34305	0.616089	2.81908	11.867
ABCB7	YBR229C	78	3.90672	7.33817	0.328472	4.92779	9.74854
ABCB7	YLR055C	32	1.60276	7.33758	0.423577	4.22955	10.4456
ABCB7	YMR129W	38	1.90327	7.33222	0.482599	3.7937	10.8707
ABCB7	YOL070C	27	1.35233	7.31016	0.493298	3.70407	10.9162
ABCB7	YMR311C	34	1.70293	7.30913	0.648493	2.56921	12.049
ABCB7	YJL107C	76	3.80655	7.29916	0.463738	3.91426	10.6841
ABCB7	YJL177W	19	0.951636	7.27258	0.584197	3.02396	11.5212
ABCB7	YJL106W	52	2.60448	7.26925	0.448424	4.00954	10.529
ABCB7	YDR098C	39	1.95336	7.24008	0.40202	4.32942	10.1507
ABCB7	YDR313C	16	0.801378	7.22991	0.65807	2.47212	11.9877
ABCB7	YML061C	7	0.350603	7.22937	0.648647	2.54006	11.9187
ABCB7	YIL160C	52	2.60448	7.21201	0.497613	3.62322	10.8008
ABCB7	YNL085W	50	2.50431	7.18357	0.552699	3.21322	11.1539
ABCB7	YMR221C	29	1.4525	7.0993	0.54262	3.24708	10.9515
ABCB7	YBL082C	43	2.1537	7.09728	0.453879	3.87597	10.3186
ABCB7	YMR143W	8	0.400689	7.08978	0.829512	1.20872	12.9708
ABCB7	YML027W	31	1.55267	7.08034	0.454165	3.8647	10.296
ABCB7	YOR059C	80	4.00689	7.07889	0.296902	4.97715	9.18063
ABCB7	YJR066W	13	0.65112	7.07624	0.725177	1.94471	12.2078
ABCB7	YPL079W	15	0.751292	7.05074	0.698688	2.12447	11.977
ABCB7	YLR068W	14	0.701206	7.0212	0.698931	2.11386	11.9285
ABCB7	YCL036W	25	1.25215	6.99731	0.532473	3.27143	10.7232
ABCB7	YOR334W	64	3.20551	6.98153	0.43345	3.95539	10.0077
ABCB7	YHR199C	8	0.400689	6.97069	0.706996	2.04244	11.8989
ABCB7	YML123C	48	2.40413	6.97023	0.448312	3.84539	10.0951
ABCB7	YHR193C	17	0.851464	6.95818	0.512477	3.39228	10.5241
ABCB7	YNL288W	68	3.40586	6.95082	0.480639	3.60999	10.2917
ABCB7	YDR309C	16	0.801378	6.94336	0.652095	2.41563	11.4711
ABCB7	YOR297C	58	2.905	6.92143	0.315627	4.73684	9.10601
ABCB7	YBR144C	20	1.00172	6.92101	0.610649	2.6947	11.1473
ABCB7	YHR198C	21	1.05181	6.90849	0.575007	2.93606	10.8809
ABCB7	YNL143C	86	4.30741	6.89691	0.341008	4.54501	9.24881
ABCB7	YML083C	27	1.35233	6.84165	0.516556	3.30756	10.3757
ABCB7	YDR144C	46	2.30396	6.82751	0.542342	3.12467	10.5304
ABCB7	YJL164C	20	1.00172	6.82222	0.610005	2.66063	10.9838
ABCB7	YDR066C	63	3.15543	6.78466	0.423129	3.91388	9.65544
ABCB7	YOR041C	6	0.300517	6.77756	0.81382	1.26185	12.2933
ABCB7	YER064C	45	2.25388	6.77447	0.520916	3.24554	10.3034
ABCB7	YDR139C	49	2.45422	6.7636	0.497325	3.39989	10.1273
ABCB7	YBR016W	36	1.8031	6.7574	0.59786	2.71742	10.7974
ABCB7	YLL025W	10	0.500861	6.75598	0.632266	2.4844	11.0276
ABCB7	YDL240W	47	2.35405	6.7132	0.512184	3.27481	10.1516
ABCB7	YMR252C	121	6.06042	6.67204	0.350229	4.33529	9.00878
ABCB7	YNL082W	43	2.1537	6.66203	0.482276	3.44909	9.87497
ABCB7	YER039C	6	0.300517	6.65846	0.916748	0.554328	12.7626
ABCB7	YPL013C	21	1.05181	6.65519	0.667157	2.21514	11.0952
ABCB7	YMR164C	50	2.50431	6.65123	0.521454	3.18292	10.1195
ABCB7	YOR368W	32	1.60276	6.63957	0.518607	3.19624	10.0829
ABCB7	YIL102C	19	0.951636	6.63628	0.50989	3.25251	10.0201
ABCB7	YER067C-A	32	1.60276	6.61781	0.581322	2.77074	10.4649
ABCB7	YBL047C	8	0.400689	6.60891	0.617981	2.52473	10.6931
ABCB7	YNL157W	17	0.851464	6.59546	0.479681	3.43174	9.75918
ABCB7	YBR033W	54	2.70465	6.58567	0.501793	3.28102	9.89032
ABCB7	YPL046C	11	0.550947	6.55732	0.789695	1.37904	11.7356
ABCB7	YOL031C	19	0.951636	6.55596	0.628669	2.43443	10.6775
ABCB7	YIL013C	28	1.40241	6.54412	0.502084	3.25842	9.82982
ABCB7	YMR130W	35	1.75301	6.53848	0.476829	3.42074	9.65621
ABCB7	YHR140W	19	0.951636	6.51222	0.73237	1.74287	11.2816
ABCB7	YBL087C	9	0.450775	6.50406	0.71276	1.86822	11.1399
ABCB7	YDR122W	36	1.8031	6.49556	0.602949	2.57907	10.4121
ABCB7	YAL004W	40	2.00345	6.47612	0.6041	2.5639	10.3884
ABCB7	YDL113C	62	3.10534	6.46718	0.487529	3.31424	9.62011
ABCB7	YIL069C	37	1.85319	6.46281	0.548631	2.91711	10.0085
ABCB7	YMR178W	28	1.40241	6.43539	0.596961	2.59371	10.2771
ABCB7	YNL281W	15	0.751292	6.42523	0.906755	0.599119	12.2513
ABCB7	YOL053W	34	1.70293	6.40288	0.545707	2.90878	9.89697
ABCB7	YHL035C	12	0.601034	6.39804	0.786769	1.36426	11.4318
ABCB7	YAR044W	12	0.601034	6.38143	0.740269	1.65746	11.1054
ABCB7	YOR051C	9	0.450775	6.37806	0.870946	0.823113	11.933
ABCB7	YHL043W	58	2.905	6.37769	0.49446	3.22418	9.5312
ABCB7	YAR028W	35	1.75301	6.35689	0.597257	2.56019	10.1536
ABCB7	YEL047C	66	3.30568	6.35478	0.487356	3.25774	9.45183
ABCB7	YJR053W	33	1.65284	6.35322	0.489336	3.24436	9.46208
ABCB7	YPL009C	28	1.40241	6.34186	0.523313	3.02308	9.66064
ABCB7	YLR004C	40	2.00345	6.30928	0.523157	3.00853	9.61002
ABCB7	YHR117W	19	0.951636	6.2996	0.629295	2.33529	10.2639
ABCB7	YBR054W	31	1.55267	6.29917	0.600552	2.51619	10.0821
ABCB7	YEL006W	10	0.500861	6.29604	0.838979	1.01379	11.5783
ABCB7	YER011W	20	1.00172	6.29489	0.650587	2.19952	10.3903
ABCB7	YOR337W	62	3.10534	6.27412	0.47848	3.27208	9.27616
ABCB7	YPR001W	25	1.25215	6.26733	0.635172	2.28649	10.2482
ABCB7	YDR162C	19	0.951636	6.26462	0.792365	1.30075	11.2285
ABCB7	YBR207W	37	1.85319	6.25619	0.464014	3.35323	9.15915
ABCB7	YJL027C	60	3.00517	6.24942	0.401683	3.73913	8.7597
ABCB7	YMR294W-A	16	0.801378	6.23992	0.594787	2.5285	9.95134
ABCB7	YER098W	73	3.65629	6.22872	0.494444	3.14896	9.30847
ABCB7	YDR015C	45	2.25388	6.22445	0.455668	3.38817	9.06073
ABCB7	YAL043C-a	28	1.40241	6.21681	0.566861	2.69274	9.74088
ABCB7	YLR070C	36	1.8031	6.21262	0.719383	1.74337	10.6819
ABCB7	YHR195W	18	0.90155	6.20871	0.60279	2.46616	9.95126
ABCB7	YOR382W	40	2.00345	6.19512	0.514484	3.00783	9.38241
ABCB7	YEL057C	60	3.00517	6.1896	0.515102	3.00132	9.37788
ABCB7	YDL117W	6	0.300517	6.18319	0.848393	0.937413	11.429
ABCB7	YER097W	12	0.601034	6.17284	0.822178	1.09767	11.248
ABCB7	YIL136W	11	0.550947	6.17268	0.799274	1.23902	11.1063
ABCB7	YOL045W	32	1.60276	6.17052	0.449452	3.39717	8.94388
ABCB7	YEL002C	37	1.85319	6.15747	0.455764	3.35112	8.96382
ABCB7	YER129W	24	1.20207	6.15434	0.691337	1.89961	10.4091
ABCB7	YOR322C	16	0.801378	6.14762	0.54754	2.78155	9.51369
ABCB7	YDR156W	13	0.65112	6.13509	0.810398	1.16323	11.107
ABCB7	YNL094W	53	2.65456	6.12079	0.503552	3.03866	9.20293
ABCB7	YJL062W	5	0.250431	6.10282	0.820958	1.09266	11.113
ABCB7	YOL072W	10	0.500861	6.0928	0.679299	1.95397	10.2316
ABCB7	YHR097C	20	1.00172	6.05	0.741281	1.56525	10.5348
ABCB7	YDR123C	52	2.60448	6.04693	0.538131	2.79289	9.30097
ABCB7	YDL079C	29	1.4525	6.03222	0.737188	1.58534	10.4791
ABCB7	YJR062C	59	2.95508	6.00816	0.58335	2.5033	9.51302
ABCB7	YDR219C	9	0.450775	6.00071	0.816329	1.10216	10.8993
ABCB7	YML107C	46	2.30396	5.99595	0.740516	1.55585	10.436
ABCB7	YPL054W	74	3.70637	5.9899	0.508238	2.94561	9.03419
ABCB7	YLL048C	32	1.60276	5.98059	0.63661	2.17329	9.78789
ABCB7	YOL001W	11	0.550947	5.9798	0.898853	0.604837	11.3548
ABCB7	YDL177C	146	7.31257	5.97162	0.383029	3.68431	8.25892
ABCB7	YDL069C	19	0.951636	5.96329	0.832151	1.00093	10.9257
ABCB7	YAL060W	56	2.80482	5.9615	0.567938	2.57574	9.34726
ABCB7	YPL108W	12	0.601034	5.92198	0.713979	1.69381	10.1501
ABCB7	YOR024W	34	1.70293	5.8897	0.562812	2.57491	9.20449
ABCB7	YMR081C	19	0.951636	5.83175	0.653344	2.02161	9.64189
ABCB7	YMR320W	104	5.20896	5.82886	0.432403	3.30845	8.34928
ABCB7	YCL013W	12	0.601034	5.80228	0.74708	1.46752	10.1371
ABCB7	YPL225W	42	2.10362	5.79898	0.489651	2.9595	8.63846
ABCB7	YJL208C	25	1.25215	5.78704	0.640615	2.07977	9.4943
ABCB7	YOR286W	20	1.00172	5.78583	0.687367	1.80884	9.76282
ABCB7	YAL028W	25	1.25215	5.7772	0.634925	2.10911	9.44529
ABCB7	YMR144W	59	2.95508	5.76501	0.57845	2.43024	9.09979
ABCB7	YLL046C	50	2.50431	5.73696	0.603403	2.27526	9.19865
ABCB7	YDR096W	35	1.75301	5.72639	0.536576	2.65375	8.79904
ABCB7	YML035C-A	28	1.40241	5.72082	0.553609	2.55373	8.88792
ABCB7	YEL014C	24	1.20207	5.70437	0.633655	2.08977	9.31898
ABCB7	YML080W	39	1.95336	5.69403	0.447434	3.14633	8.24173
ABCB7	YML007W	35	1.75301	5.69055	0.673343	1.85886	9.52225
ABCB7	YDR130C	36	1.8031	5.67763	0.705838	1.67014	9.68511
ABCB7	YLR150W	13	0.65112	5.65843	0.864075	0.769121	10.5477
ABCB7	YJR025C	19	0.951636	5.65327	0.648418	1.98759	9.31894
ABCB7	YLR044C	19	0.951636	5.65306	0.710002	1.63938	9.66674
ABCB7	YML078W	102	5.10878	5.64522	0.43146	3.20953	8.08091
ABCB7	YJL154C	18	0.90155	5.64383	0.838366	0.912236	10.3754
ABCB7	YMR222C	41	2.05353	5.63781	0.623807	2.1209	9.15471
ABCB7	YJR051W	76	3.80655	5.62402	0.526795	2.66132	8.58673
ABCB7	YIL100W	26	1.30224	5.6138	0.582914	2.34144	8.88616
ABCB7	YHR017W	23	1.15198	5.60992	0.651065	1.95749	9.26234
ABCB7	YJL112W	95	4.75818	5.55592	0.409903	3.27854	7.83331
ABCB7	YOR280C	48	2.40413	5.54279	0.5834	2.30912	8.77645
ABCB7	YJL169W	24	1.20207	5.53478	0.556007	2.4574	8.61215
ABCB7	YJR084W	83	4.15715	5.53418	0.51202	2.70057	8.36779
ABCB7	YMR154C	147	7.36266	5.52843	0.329551	3.70653	7.35034
ABCB7	YER093C-A	71	3.55611	5.50978	0.539258	2.53859	8.48098
ABCB7	YBR203W	21	1.05181	5.50466	0.710522	1.59348	9.41584
ABCB7	YPL047W	19	0.951636	5.49538	0.673515	1.79416	9.1966
ABCB7	YHL019C	17	0.851464	5.47689	0.638391	1.98049	8.97329
ABCB7	YHR057C	33	1.65284	5.47663	0.614482	2.11134	8.84192
ABCB7	YOR022C	38	1.90327	5.4684	0.691227	1.68849	9.2483
ABCB7	YHR182W	23	1.15198	5.45278	0.772332	1.24142	9.66414
ABCB7	YOR011W	72	3.6062	5.4453	0.500642	2.71915	8.17144
ABCB7	YNL072W	39	1.95336	5.43701	0.63285	1.9962	8.87781
ABCB7	YBR206W	59	2.95508	5.41004	0.532038	2.53169	8.28839
ABCB7	YBR076W	8	0.400689	5.4052	0.889692	0.596237	10.2142
ABCB7	YDL224C	84	4.20723	5.39519	0.441411	3.0137	7.77669
ABCB7	YOR298W	114	5.70982	5.38448	0.481233	2.79329	7.97566
ABCB7	YER182W	19	0.951636	5.38318	0.676451	1.74172	9.02464
ABCB7	YBR173C	7	0.350603	5.37442	0.873683	0.678878	10.07
ABCB7	YBR012C	38	1.90327	5.36661	0.500583	2.68018	8.05304
ABCB7	YBL089W	30	1.50258	5.35608	0.818987	0.969519	9.74264
ABCB7	YCL033C	24	1.20207	5.33354	0.641116	1.91412	8.75296
ABCB7	YJR009C	29	1.4525	5.33136	0.857509	0.759671	9.90305
ABCB7	YDR003W	30	1.50258	5.32289	0.651154	1.85687	8.78891
ABCB7	YPL030W	40	2.00345	5.31984	0.46616	2.83994	7.79973
ABCB7	YJR038C	24	1.20207	5.30479	0.760404	1.27101	9.33857
ABCB7	YHR006W	83	4.15715	5.30395	0.585958	2.19606	8.41185
ABCB7	YLR135W	22	1.10189	5.288	0.866181	0.707636	9.86837
ABCB7	YCL012W	42	2.10362	5.28685	0.635923	1.92482	8.64888
ABCB7	YJL187C	52	2.60448	5.28381	0.706628	1.55012	9.0175
ABCB7	YDL178W	81	4.05698	5.27932	0.606256	2.0787	8.47994
ABCB7	YHR012W	14	0.701206	5.20018	0.727057	1.41935	8.98102
ABCB7	YER139C	25	1.25215	5.19232	0.672651	1.6997	8.68494
ABCB7	YDL157C	106	5.30913	5.17612	0.6205	1.96434	8.3879
ABCB7	YBR255W	19	0.951636	5.15584	0.732523	1.37907	8.93262
ABCB7	YJL212C	39	1.95336	5.15527	0.598697	2.06882	8.24171
ABCB7	YOL027C	18	0.90155	5.13454	0.754337	1.26136	9.00772
ABCB7	YDR097C	35	1.75301	5.12497	0.653254	1.77706	8.47288
ABCB7	YJL024C	11	0.550947	5.1112	0.777463	1.13743	9.08496
ABCB7	YJR097W	200	10.0172	5.11008	0.379401	3.17131	7.04884
ABCB7	YOR044W	12	0.601034	5.09947	0.880989	0.606894	9.59204
ABCB7	YMR126C	15	0.751292	5.07979	0.749727	1.27133	8.88825
ABCB7	YJL150W	74	3.70637	5.07302	0.814844	0.939298	9.20675
ABCB7	YPL172C	13	0.65112	5.06626	0.886386	0.575598	9.55692
ABCB7	YLR214W	9	0.450775	5.04977	0.907423	0.467491	9.63206
ABCB7	YOR064C	44	2.20379	5.03599	0.880813	0.600224	9.47177
ABCB7	YCL038C	55	2.75474	5.02925	0.487037	2.57982	7.47868
ABCB7	YDR269C	30	1.50258	5.02611	0.767924	1.16644	8.88579
ABCB7	YOR311C	9	0.450775	5.01366	0.916603	0.418125	9.60919
ABCB7	YDR247W	11	0.550947	5.01279	0.923766	0.382148	9.64344
ABCB7	YDR261C	15	0.751292	5.00939	0.839322	0.804898	9.21389
ABCB7	YMR008C	53	2.65456	4.98642	0.590726	2.04081	7.93202
ABCB7	YLR134W	15	0.751292	4.9761	0.813931	0.9259	9.02631
ABCB7	YDR259C	17	0.851464	4.96451	0.749385	1.24418	8.68484
ABCB7	YMR304W	8	0.400689	4.92924	0.92254	0.381821	9.47666
ABCB7	YPL101W	12	0.601034	4.90437	0.985379	0.0717056	9.73703
ABCB7	YPL107W	55	2.75474	4.90417	0.659297	1.67087	8.13748
ABCB7	YOR003W	47	2.35405	4.9017	0.646969	1.73045	8.07295
ABCB7	YAL029C	19	0.951636	4.89474	0.723006	1.35582	8.43367
ABCB7	YOL016C	18	0.90155	4.89068	0.717409	1.38206	8.3993
ABCB7	YNL275W	40	2.00345	4.88964	0.704313	1.4458	8.33347
ABCB7	YNL266W	35	1.75301	4.88801	0.602731	1.94185	7.83416
ABCB7	YLR003C	98	4.90844	4.88665	0.484855	2.51733	7.25597
ABCB7	YHL028W	18	0.90155	4.87401	0.80189	0.965588	8.78244
ABCB7	YPL087W	23	1.15198	4.86247	0.627959	1.80904	7.9159
ABCB7	YNL125C	60	3.00517	4.86197	0.64596	1.72133	8.0026
ABCB7	YOR265W	46	2.30396	4.84326	0.588269	1.99412	7.69241
ABCB7	YOR226C	10	0.500861	4.83959	0.942301	0.279238	9.39993
ABCB7	YIL084C	11	0.550947	4.83839	0.800136	0.967019	8.70976
ABCB7	YDR214W	36	1.8031	4.83734	0.851518	0.718257	8.95642
ABCB7	YOR240W	18	0.90155	4.8251	0.880524	0.576486	9.07372
ABCB7	YER115C	25	1.25215	4.82046	0.715512	1.37136	8.26955
ABCB7	YJL083W	66	3.30568	4.80478	0.546827	2.1774	7.43216
ABCB7	YMR107W	21	1.05181	4.79994	0.897768	0.490708	9.10917
ABCB7	YIL072W	8	0.400689	4.79672	0.968984	0.148774	9.44466
ABCB7	YEL028W	53	2.65456	4.79599	0.601184	1.91272	7.67927
ABCB7	YOR306C	57	2.85491	4.78996	0.801538	0.950623	8.6293
ABCB7	YML062C	41	2.05353	4.78799	0.794626	0.983329	8.59266
ABCB7	YJR094W-A	26	1.30224	4.77686	0.794089	0.983607	8.57011
ABCB7	YLR035C	29	1.4525	4.76708	0.773133	1.08149	8.45267
ABCB7	YLR210W	21	1.05181	4.73493	0.761735	1.12817	8.3417
ABCB7	YOR017W	38	1.90327	4.72692	0.645481	1.67578	7.77805
ABCB7	YLR028C	34	1.70293	4.72499	0.729418	1.2785	8.17149
ABCB7	YOR061W	11	0.550947	4.71504	0.715125	1.3432	8.08689
ABCB7	YNL212W	28	1.40241	4.70937	0.724174	1.29896	8.11977
ABCB7	YAL066W	25	1.25215	4.7092	0.754125	1.15788	8.26052
ABCB7	YJL053W	23	1.15198	4.70093	0.690641	1.45427	7.94758
ABCB7	YDR056C	36	1.8031	4.70086	0.675011	1.52773	7.87399
ABCB7	YJL159W	12	0.601034	4.69155	0.828552	0.804356	8.57875
ABCB7	YBR238C	18	0.90155	4.6854	0.671357	1.53983	7.83098
ABCB7	YDR171W	78	3.90672	4.68059	0.546377	2.12322	7.23795
ABCB7	YDR086C	11	0.550947	4.67201	0.759801	1.12221	8.22182
ABCB7	YDR090C	45	2.25388	4.65651	0.586863	1.92378	7.38924
ABCB7	YDL206W	82	4.10706	4.63802	0.825822	0.807844	8.46821
ABCB7	YOR126C	38	1.90327	4.63624	0.733662	1.23481	8.03767
ABCB7	YIL167W	28	1.40241	4.63447	0.659694	1.57714	7.6918
ABCB7	YLL063C	16	0.801378	4.6107	0.883218	0.538445	8.68295
ABCB7	YMR204C	28	1.40241	4.6077	0.706761	1.35116	7.86425
ABCB7	YDL112W	29	1.4525	4.58758	0.80656	0.887422	8.28774
ABCB7	YNL230C	15	0.751292	4.58447	0.780327	1.00709	8.16186
ABCB7	YLL047W	150	7.51292	4.5836	0.294962	3.23161	5.93559
ABCB7	YEL039C	31	1.55267	4.58257	0.796449	0.932785	8.23235
ABCB7	YHR080C	52	2.60448	4.58047	0.70972	1.32962	7.83132
ABCB7	YIL032C	17	0.851464	4.54753	0.750252	1.13573	7.95932
ABCB7	YOR358W	11	0.550947	4.54488	0.969466	0.138773	8.95099
ABCB7	YDL154W	230	11.5198	4.53071	0.524377	2.15491	6.90651
ABCB7	YDR075W	11	0.550947	4.52265	0.846515	0.694159	8.35114
ABCB7	YJL133W	34	1.70293	4.52054	0.764245	1.06574	7.97534
ABCB7	YOR197W	24	1.20207	4.51469	0.79984	0.903663	8.12572
ABCB7	YLR036C	32	1.60276	4.49219	0.764973	1.05579	7.92859
ABCB7	YOR067C	21	1.05181	4.48737	0.941383	0.263038	8.7117
ABCB7	YJL078C	74	3.70637	4.47722	0.529118	2.10824	6.8462
ABCB7	YJR127C	72	3.6062	4.47043	0.811278	0.843666	8.09719
ABCB7	YBR067C	43	2.1537	4.46694	0.673383	1.45898	7.47489
ABCB7	YLL038C	7	0.350603	4.46358	0.841051	0.709482	8.21768
ABCB7	YLL015W	22	1.10189	4.46282	0.680553	1.42564	7.5
ABCB7	YPL096W	17	0.851464	4.45756	0.857527	0.635083	8.28004
ABCB7	YDR263C	38	1.90327	4.45679	0.726608	1.21845	7.69512
ABCB7	YPL258C	16	0.801378	4.45591	0.768472	1.03166	7.88015
ABCB7	YJL144W	20	1.00172	4.45237	0.897158	0.457889	8.44685
ABCB7	YBR066C	32	1.60276	4.43835	0.750639	1.10675	7.76995
ABCB7	YOR040W	59	2.95508	4.43216	0.482686	2.29282	6.57151
ABCB7	YML052W	67	3.35577	4.42257	0.666534	1.47478	7.37037
ABCB7	YOR276W	12	0.601034	4.41126	0.911058	0.392347	8.43017
ABCB7	YPL268W	5	0.250431	4.38946	0.743142	1.12747	7.65146
ABCB7	YHR123W	22	1.10189	4.38489	0.71156	1.26478	7.50501
ABCB7	YER088C	17	0.851464	4.37158	0.714982	1.24598	7.49718
ABCB7	YLL005C	35	1.75301	4.35654	0.72947	1.17857	7.5345
ABCB7	YHR079C	17	0.851464	4.35488	0.706529	1.27803	7.43173
ABCB7	YPL022W	17	0.851464	4.32053	0.596826	1.74192	6.89913
ABCB7	YBL078C	27	1.35233	4.31202	0.879823	0.518207	8.10583
ABCB7	YOR016C	41	2.05353	4.3053	0.532346	2.01339	6.5972
ABCB7	YJL207C	20	1.00172	4.29697	0.812344	0.806351	7.78758
ABCB7	YHR138C	27	1.35233	4.29061	0.764932	1.00859	7.57264
ABCB7	YDR276C	5	0.250431	4.28102	0.985777	0.0608911	8.50116
ABCB7	YIL110W	32	1.60276	4.27658	0.824473	0.750654	7.8025
ABCB7	YJL043W	60	3.00517	4.27069	0.79279	0.88493	7.65645
ABCB7	YML032C-A	35	1.75301	4.26532	0.771113	0.976277	7.55437
ABCB7	YOR354C	33	1.65284	4.23015	0.821364	0.755656	7.70465
ABCB7	YOL011W	25	1.25215	4.22026	0.910376	0.378236	8.06228
ABCB7	YHR046C	13	0.65112	4.21778	0.937429	0.263912	8.17164
ABCB7	YBR045C	53	2.65456	4.21692	0.855145	0.610841	7.823
ABCB7	YER075C	22	1.10189	4.19062	0.811001	0.792023	7.58922
ABCB7	YJL070C	88	4.40758	4.18785	0.54955	1.88641	6.48928
ABCB7	YCL076W	37	1.85319	4.18518	0.772843	0.950693	7.41966
ABCB7	YML013W	8	0.400689	4.17975	0.869052	0.547328	7.81217
ABCB7	YHR009C	96	4.80827	4.1782	0.584454	1.73623	6.62016
ABCB7	YJL030W	100	5.00861	4.16444	0.63779	1.5084	6.82048
ABCB7	YOR301W	17	0.851464	4.1486	0.750367	1.03563	7.26158
ABCB7	YHR160C	10	0.500861	4.14747	0.941327	0.243346	8.05159
ABCB7	YJR049C	43	2.1537	4.12985	0.647121	1.45733	6.80236
ABCB7	YAR031W	34	1.70293	4.11944	0.902649	0.401033	7.83785
ABCB7	YMR148W	60	3.00517	4.10846	0.637673	1.48861	6.72832
ABCB7	YNL199C	7	0.350603	4.09559	0.828722	0.701482	7.48969
ABCB7	YDL096C	37	1.85319	4.07624	0.795469	0.833715	7.31876
ABCB7	YDL067C	11	0.550947	4.07164	0.985481	0.0591159	8.08416
ABCB7	YHL044W	22	1.10189	4.0682	0.80897	0.77715	7.35925
ABCB7	YBR212W	39	1.95336	4.06308	0.753645	1.00096	7.12521
ABCB7	YMR283C	25	1.25215	4.05443	0.574931	1.72341	6.38545
ABCB7	YMR158W-A	24	1.20207	4.0493	0.837103	0.659619	7.43898
ABCB7	YDR094W	51	2.55439	4.04215	0.583027	1.68547	6.39883
ABCB7	YOR304C-A	22	1.10189	4.02018	0.78174	0.877445	7.16291
ABCB7	YOR263C	27	1.35233	4.00121	0.845867	0.61672	7.3857
ABCB7	YPL036W	78	3.90672	3.9927	0.546157	1.81206	6.17334
ABCB7	YCR020C	14	0.701206	3.98751	0.899925	0.399048	7.57597
ABCB7	YDR151C	43	2.1537	3.97718	0.799552	0.79722	7.15715
ABCB7	YHL002W	130	6.5112	3.96831	0.657775	1.35806	6.57856
ABCB7	YPL004C	20	1.00172	3.96817	0.791084	0.829015	7.10732
ABCB7	YLL039C	16	0.801378	3.94963	0.810373	0.748957	7.15029
ABCB7	YML119W	50	2.50431	3.94809	0.881655	0.467235	7.42894
ABCB7	YPL051W	19	0.951636	3.91001	0.949666	0.196805	7.62321
ABCB7	YBR232C	52	2.60448	3.87047	0.890523	0.423727	7.31722
ABCB7	YJL065C	26	1.30224	3.86818	0.91317	0.335873	7.40048
ABCB7	YDL074C	66	3.30568	3.86391	0.496166	1.94677	5.78106
ABCB7	YER024W	28	1.40241	3.85356	0.844477	0.599319	7.10781
ABCB7	YML115C	36	1.8031	3.85239	0.816606	0.706507	6.99827
ABCB7	YJL130C	23	1.15198	3.84502	0.860063	0.53806	7.15197
ABCB7	YLR207W	20	1.00172	3.82705	0.879393	0.46157	7.19254
ABCB7	YOR375C	20	1.00172	3.80237	0.825029	0.665304	6.93944
ABCB7	YML101C	77	3.85663	3.7832	0.812017	0.711178	6.85522
ABCB7	YDL051W	40	2.00345	3.77355	0.870498	0.488683	7.05841
ABCB7	YOR090C	60	3.00517	3.75901	0.658297	1.28446	6.23356
ABCB7	YJR116W	109	5.45939	3.75728	0.662288	1.26888	6.24568
ABCB7	YJR078W	55	2.75474	3.72596	0.969422	0.113933	7.33799
ABCB7	YDL171C	118	5.91016	3.71559	0.759844	0.892322	6.53886
ABCB7	YDL172C	53	2.65456	3.7127	0.560153	1.63302	5.79238
ABCB7	YPL052W	20	1.00172	3.71224	0.777849	0.824678	6.59981
ABCB7	YJL098W	42	2.10362	3.69862	0.816781	0.677656	6.71958
ABCB7	YER167W	25	1.25215	3.68842	0.816253	0.677734	6.6991
ABCB7	YDR018C	78	3.90672	3.66064	0.798853	0.736327	6.58496
ABCB7	YDR048C	20	1.00172	3.623	0.930073	0.253346	6.99265
ABCB7	YIL132C	76	3.80655	3.5529	0.867639	0.470266	6.63553
ABCB7	YJL051W	54	2.70465	3.52781	0.906043	0.331463	6.72415
ABCB7	YJL057C	48	2.40413	3.51657	0.940998	0.207483	6.82565
ABCB7	YOR289W	41	2.05353	3.50413	0.848844	0.529672	6.47859
ABCB7	YML095C	36	1.8031	3.49968	0.669819	1.15553	5.84383
ABCB7	YIL105C	52	2.60448	3.49535	0.936151	0.223174	6.76753
ABCB7	YJL064W	69	3.45594	3.48403	0.735565	0.921298	6.04677
ABCB7	YDR221W	60	3.00517	3.46549	0.998213	0.00619315	6.92478
ABCB7	YOR031W	31	1.55267	3.4406	0.914952	0.292617	6.58859
ABCB7	YHR126C	12	0.601034	3.43549	0.965865	0.117269	6.75371
ABCB7	YJR056C	42	2.10362	3.42931	0.760189	0.822386	6.03624
ABCB7	YCL075W	116	5.80999	3.42567	0.479752	1.7822	5.06915
ABCB7	YJL209W	15	0.751292	3.41931	0.961418	0.131924	6.70669
ABCB7	YDR202C	16	0.801378	3.41082	0.774729	0.768358	6.05328
ABCB7	YHR161C	23	1.15198	3.39138	0.808757	0.648576	6.13418
ABCB7	YBR242W	47	2.35405	3.38409	0.895546	0.353481	6.4147
ABCB7	YDR085C	26	1.30224	3.37728	0.981055	0.0639821	6.69058
ABCB7	YJR092W	95	4.75818	3.37005	0.770936	0.771957	5.96814
ABCB7	YER072W	18	0.90155	3.35674	0.842989	0.527044	6.18643
ABCB7	YIL011W	24	1.20207	3.32394	0.86722	0.441352	6.20652
ABCB7	YBL085W	23	1.15198	3.31501	0.793955	0.68304	5.94698
ABCB7	YJR107W	133	6.66145	3.2854	0.52122	1.57299	4.99782
ABCB7	YDR157W	42	2.10362	3.2811	0.983328	0.0547038	6.50749
ABCB7	YJR020W	65	3.2556	3.24475	0.910102	0.291698	6.19779
ABCB7	YMR006C	72	3.6062	3.23454	0.969446	0.0988272	6.37026
ABCB7	YJR154W	50	2.50431	3.21442	0.697206	0.973304	5.45553
ABCB7	YMR285C	69	3.45594	3.21281	0.960309	0.127521	6.2981
ABCB7	YJL068C	84	4.20723	3.1666	0.916648	0.263944	6.06926
ABCB7	YPL112C	30	1.50258	3.15297	0.632733	1.15798	5.14795
ABCB7	YJR124C	29	1.4525	3.13379	0.843106	0.491673	5.77591
ABCB7	YER148W	23	1.15198	3.11862	0.886711	0.353306	5.88394
ABCB7	YCL074W	88	4.40758	3.10919	0.87503	0.388557	5.82983
ABCB7	YHR131C	41	2.05353	3.07491	0.800486	0.613488	5.53634
ABCB7	YBR261C	61	3.05525	3.05867	0.334642	2.03511	4.08223
ABCB7	YJL158C	27	1.35233	3.04774	0.87428	0.383161	5.71232
ABCB7	YOL036W	36	1.8031	3.03851	0.816729	0.556871	5.52015
ABCB7	YOR300W	191	9.56645	3.03292	0.685191	0.95479	5.11104
ABCB7	YHR127W	30	1.50258	2.96416	0.966853	0.0982532	5.83007
ABCB7	YDL202W	5	0.250431	2.9585	0.995498	0.0133197	5.90369
ABCB7	YER060W	34	1.70293	2.94963	0.881483	0.349581	5.54968
ABCB7	YOR094W	128	6.41102	2.93765	0.918457	0.239544	5.63575
ABCB7	YHR108W	31	1.55267	2.92572	0.768186	0.678223	5.17321
ABCB7	YCL006C	157	7.86352	2.92282	0.700125	0.876481	4.96916
ABCB7	YJL037W	100	5.00861	2.92247	0.881472	0.346395	5.49855
ABCB7	YJL162C	21	1.05181	2.88091	0.967473	0.0937081	5.66811
ABCB7	YDR093W	27	1.35233	2.86592	0.931456	0.196443	5.5354
ABCB7	YJL017W	22	1.10189	2.72434	0.842582	0.42886	5.01982
ABCB7	YNL093W	55	2.75474	2.69245	0.898665	0.272841	5.11207
ABCB7	YPL226W	887	44.4264	2.66791	0.392602	1.62048	3.71534
ABCB7	YER176W	17	0.851464	2.64555	0.938373	0.163036	5.12806
ABCB7	YOR028C	72	3.6062	2.62289	0.983866	0.0423165	5.20347
ABCB7	YOL085C	40	2.00345	2.58622	0.900957	0.256147	4.9163
ABCB7	YHR106W	32	1.60276	2.58077	0.958369	0.10744	5.05409
ABCB7	YJL042W	769	38.5162	2.57307	0.668526	0.852906	4.29324
ABCB7	YML037C	125	6.26077	2.47788	0.683475	0.784311	4.17144
ABCB7	YMR140W	53	2.65456	2.45146	0.994145	0.0143536	4.88857
ABCB7	YPL148C	26	1.30224	2.44851	0.645808	0.867242	4.02978
ABCB7	YER087C-A	32	1.60276	2.32216	0.949192	0.117984	4.52633
ABCB7	YML079W	34	1.70293	2.27329	0.662052	0.768256	3.77833
ABCB7	YER002W	19	0.951636	2.08267	0.728102	0.566273	3.59906
ABCB7	YDL174C	139	6.96197	2.0592	0.841367	0.326657	3.79174
ABCB7	YMR172C-A	38	1.90327	2.04195	0.520497	0.97912	3.10477
ABCB7	YOR364W	12	0.601034	1.90636	0.695616	0.580266	3.23246
ABCB7	YBR034C	16	0.801378	1.8285	0.753885	0.45002	3.20697
ABCB7	YJR115W	37	1.85319	1.41295	0.674407	0.460047	2.36585
ABCB7	YDL123W	71	3.55611	1.23262	0.61472	0.474903	1.99033
ABCB7	YLR018C	444	22.2382	-0.822085	0.989664	-0.00849719	-1.63567
ABCB7	YDR192C	106	5.30913	-0.941181	0.904823	-0.0895792	-1.79278
ABCB7	YDR216W	20	1.00172	-0.941691	0.508295	-0.463034	-1.42035
ABCB7	YAL037W	26	1.30224	-1.1146	0.560987	-0.489322	-1.73987
ABCB7	YDL231C	80	4.00689	-1.14554	0.543393	-0.523063	-1.76802
ABCB7	YOR144C	9	0.450775	-1.18361	0.739209	-0.308674	-2.05854
ABCB7	YOR025W	20	1.00172	-1.19964	0.512055	-0.58536	-1.81393
ABCB7	YJR010W	39	1.95336	-1.34417	0.908435	-0.123079	-2.56527
ABCB7	YJR050W	14	0.701206	-1.34599	0.241614	-1.02078	-1.6712
ABCB7	YER172C-A	18	0.90155	-1.34752	0.7907	-0.282036	-2.413
ABCB7	YOR034C	24	1.20207	-1.39063	0.587613	-0.573478	-2.20778
ABCB7	YOR102W	6	0.300517	-1.46745	0.761304	-0.350275	-2.58463
ABCB7	YJR098C	343	17.1795	-1.46885	0.506514	-0.724859	-2.21285
ABCB7	YDR043C	53	2.65456	-1.49697	0.941274	-0.0879115	-2.90604
ABCB7	YAL018C	13	0.65112	-1.51118	0.295352	-1.06485	-1.95751
ABCB7	YJL115W	1	0.0500861	-1.51967	0.594522	-0.616194	-2.42315
ABCB7	YDR068W	291	14.5751	-1.57995	0.686799	-0.49484	-2.66505
ABCB7	YOR367W	7	0.350603	-1.5981	0.326115	-1.07693	-2.11926
ABCB7	YLR184W	1	0.0500861	-1.62294	0.948317	-0.0838782	-3.16201
ABCB7	YJR106W	211	10.5682	-1.68983	0.739769	-0.439746	-2.93992
ABCB7	YDL161W	66	3.30568	-1.74591	0.512513	-0.851107	-2.64071
ABCB7	YNL311C	120	6.01034	-1.85985	0.930205	-0.129809	-3.58989
ABCB7	YJR152W	123	6.16059	-1.92409	0.886082	-0.219188	-3.62898
ABCB7	YOR114W	31	1.55267	-1.97871	0.720663	-0.552726	-3.40469
ABCB7	YIL138C	21	1.05181	-1.97959	0.699838	-0.594197	-3.36498
ABCB7	YDR176W	1	0.0500861	-1.9973	0.954194	-0.0914879	-3.90311
ABCB7	YDR241W	1	0.0500861	-1.99736	0.885613	-0.228472	-3.76626
ABCB7	YDR028C	53	2.65456	-2.01314	0.267674	-1.47428	-2.55201
ABCB7	YBR224W	38	1.90327	-2.05594	0.582906	-0.857521	-3.25436
ABCB7	YER157W	13	0.65112	-2.07815	0.887131	-0.234558	-3.92174
ABCB7	YML102W	36	1.8031	-2.08491	0.941227	-0.122536	-4.04729
ABCB7	YNL219C	62	3.10534	-2.13386	0.725777	-0.585154	-3.68257
ABCB7	YLR057W	2	0.100172	-2.14939	0.311811	-1.47918	-2.81959
ABCB7	YNL324W	2	0.100172	-2.1727	0.103167	-1.94855	-2.39685
ABCB7	YIL009W	87	4.35749	-2.17435	0.688254	-0.677843	-3.67085
ABCB7	YML001W	8	0.400689	-2.18768	0.964147	-0.078435	-4.29692
ABCB7	YNL120C	3	0.150258	-2.19307	0.837766	-0.35579	-4.03035
ABCB7	YNL201C	23	1.15198	-2.19652	0.683148	-0.695972	-3.69706
ABCB7	YPL256C	22	1.10189	-2.20899	0.921513	-0.173377	-4.2446
ABCB7	YJL038C	94	4.7081	-2.22144	0.870582	-0.287494	-4.15538
ABCB7	YDR030C	45	2.25388	-2.23199	0.862995	-0.305792	-4.15818
ABCB7	YOR237W	1	0.0500861	-2.24252	0.267398	-1.64287	-2.84216
ABCB7	YML048W-A	2	0.100172	-2.2546	0.357071	-1.44955	-3.05965
ABCB7	YHR156C	10	0.500861	-2.25508	0.961758	-0.0862381	-4.42393
ABCB7	YBR128C	14	0.701206	-2.27029	0.976959	-0.05231	-4.48828
ABCB7	YCL027W	4	0.200345	-2.28141	0.864668	-0.308748	-4.25407
ABCB7	YLR180W	109	5.45939	-2.31427	0.740082	-0.601521	-4.02703
ABCB7	YDL082W	1	0.0500861	-2.31714	0.578709	-0.976191	-3.65809
ABCB7	YHR209W	10	0.500861	-2.32534	0.988441	-0.0268782	-4.6238
ABCB7	YPL269W	3	0.150258	-2.32732	0.901279	-0.229754	-4.42488
ABCB7	YIL146C	41	2.05353	-2.33084	0.920433	-0.185457	-4.47622
ABCB7	YMR019W	27	1.35233	-2.35014	0.214529	-1.84596	-2.85431
ABCB7	YPL240C	13	0.65112	-2.35278	0.991547	-0.0198891	-4.68566
ABCB7	YER119C-A	26	1.30224	-2.36932	0.882883	-0.277487	-4.46116
ABCB7	YDL070W	5	0.250431	-2.37054	0.899037	-0.239337	-4.50174
ABCB7	YBR263W	7	0.350603	-2.37989	0.839155	-0.382794	-4.37698
ABCB7	YML059C	23	1.15198	-2.3883	0.948292	-0.123494	-4.6531
ABCB7	YAL051W	7	0.350603	-2.39764	0.995916	-0.00979212	-4.78548
ABCB7	YMR280C	9	0.450775	-2.40114	0.78553	-0.514974	-4.28731
ABCB7	YJR044C	1	0.0500861	-2.40241	0.792945	-0.497431	-4.30739
ABCB7	YDL223C	77	3.85663	-2.40685	0.667765	-0.799638	-4.01405
ABCB7	YNL217W	3	0.150258	-2.40966	0.775195	-0.541705	-4.27762
ABCB7	YDR320C	1	0.0500861	-2.41744	0.772446	-0.550098	-4.28478
ABCB7	YPL116W	24	1.20207	-2.44337	0.618543	-0.93204	-3.9547
ABCB7	YOR233W	56	2.80482	-2.44867	0.506066	-1.20948	-3.68786
ABCB7	YJR131W	20	1.00172	-2.47242	0.551583	-1.10867	-3.83616
ABCB7	YBR069C	22	1.10189	-2.48004	0.768634	-0.573798	-4.38629
ABCB7	YDR153C	1206	60.4039	-2.49321	0.455416	-1.35776	-3.62865
ABCB7	YOR008C	2	0.100172	-2.50784	0.839757	-0.401863	-4.61381
ABCB7	YER045C	9	0.450775	-2.52445	0.838072	-0.40878	-4.64012
ABCB7	YIL052C	25	1.25215	-2.53009	0.930337	-0.176254	-4.88392
ABCB7	YCL024W	5	0.250431	-2.53563	0.897802	-0.259137	-4.81213
ABCB7	YDR125C	22	1.10189	-2.54385	0.43778	-1.43021	-3.6575
ABCB7	YML071C	13	0.65112	-2.55162	0.82571	-0.444723	-4.65851
ABCB7	YML100W	9	0.450775	-2.56029	0.664991	-0.857721	-4.26287
ABCB7	YCL039W	68	3.40586	-2.56633	0.860076	-0.35909	-4.77356
ABCB7	YOR379C	24	1.20207	-2.57388	0.955021	-0.11577	-5.032
ABCB7	YIL168W	29	1.4525	-2.58416	0.856175	-0.371666	-4.79666
ABCB7	YDL170W	129	6.46111	-2.585	0.849848	-0.388143	-4.78185
ABCB7	YDL236W	78	3.90672	-2.59304	0.752146	-0.642696	-4.54338
ABCB7	YJR021C	9	0.450775	-2.60289	0.98175	-0.0475036	-5.15827
ABCB7	YMR186W	67	3.35577	-2.60574	0.725652	-0.71488	-4.49661
ABCB7	YHL005C	11	0.550947	-2.60764	0.787808	-0.553321	-4.66196
ABCB7	YLR179C	4	0.200345	-2.61964	0.90345	-0.252927	-4.98635
ABCB7	YDR134C	33	1.65284	-2.61988	0.502594	-1.30314	-3.93662
ABCB7	YDL230W	39	1.95336	-2.63154	0.41774	-1.53224	-3.73084
ABCB7	YBR046C	26	1.30224	-2.63406	0.796481	-0.536082	-4.73204
ABCB7	YBR018C	13	0.65112	-2.63645	0.965699	-0.0904324	-5.18247
ABCB7	YIL001W	21	1.05181	-2.64643	0.94502	-0.145501	-5.14736
ABCB7	YBL103C	8	0.400689	-2.65978	0.833871	-0.441865	-4.87769
ABCB7	YOR009W	42	2.10362	-2.66247	0.980922	-0.0507951	-5.27414
ABCB7	YPL184C	20	1.00172	-2.68606	0.755725	-0.656137	-4.71598
ABCB7	YOL079W	16	0.801378	-2.69795	0.955639	-0.119683	-5.27622
ABCB7	YLR191W	4	0.200345	-2.69893	0.838633	-0.435518	-4.96235
ABCB7	YDR209C	4	0.200345	-2.70545	0.790828	-0.565903	-4.845
ABCB7	YNL175C	1	0.0500861	-2.71007	0.242063	-2.05407	-3.36608
ABCB7	YNL303W	12	0.601034	-2.72531	0.997411	-0.00705488	-5.44357
ABCB7	YIL094C	1	0.0500861	-2.73266	0.456663	-1.48476	-3.98057
ABCB7	YAR029W	18	0.90155	-2.739	0.277605	-1.97864	-3.49936
ABCB7	YML030W	29	1.4525	-2.74507	0.698361	-0.828021	-4.66212
ABCB7	YDL024C	6	0.300517	-2.75284	0.880849	-0.328004	-5.17768
ABCB7	YBL102W	27	1.35233	-2.76701	0.962954	-0.102506	-5.43152
ABCB7	YJR130C	68	3.40586	-2.76855	0.882436	-0.325483	-5.21163
ABCB7	YDR020C	9	0.450775	-2.77435	0.865177	-0.374048	-5.17465
ABCB7	YBL086C	61	3.05525	-2.77976	0.81931	-0.502275	-5.05725
ABCB7	YOR266W	4	0.200345	-2.80146	0.749082	-0.702936	-4.89998
ABCB7	YDL006W	2	0.100172	-2.81438	0.755601	-0.687832	-4.94093
ABCB7	YOR158W	7	0.350603	-2.81484	0.843175	-0.441436	-5.18824
ABCB7	YOR195W	8	0.400689	-2.83002	0.94106	-0.1668	-5.49325
ABCB7	YJR054W	15	0.751292	-2.83072	0.987236	-0.0361311	-5.6253
ABCB7	YLL061W	25	1.25215	-2.85265	0.862442	-0.392406	-5.31289
ABCB7	YAL053W	22	1.10189	-2.85892	0.84	-0.457428	-5.26041
ABCB7	YPL147W	23	1.15198	-2.85945	0.657735	-0.97869	-4.74021
ABCB7	YBR250W	12	0.601034	-2.86216	0.968227	-0.0909383	-5.63339
ABCB7	YEL027W	1	0.0500861	-2.86413	0.611055	-1.11399	-4.61427
ABCB7	YOR273C	241	12.0708	-2.86966	0.42828	-1.64064	-4.09867
ABCB7	YJL186W	12	0.601034	-2.87313	0.767463	-0.668109	-5.07816
ABCB7	YHR121W	30	1.50258	-2.88909	0.787405	-0.614205	-5.16398
ABCB7	YIL064W	9	0.450775	-2.88998	0.968578	-0.0908077	-5.68915
ABCB7	YML118W	7	0.350603	-2.89278	0.863942	-0.393586	-5.39198
ABCB7	YPL033C	10	0.500861	-2.89569	0.827167	-0.500472	-5.29092
ABCB7	YJR079W	5	0.250431	-2.90462	0.997418	-0.00749937	-5.80174
ABCB7	YIR003W	338	16.9291	-2.90687	0.316605	-1.98654	-3.8272
ABCB7	YHR130C	9	0.450775	-2.9128	0.927531	-0.211087	-5.61452
ABCB7	YDR258C	65	3.2556	-2.91428	0.62327	-1.0979	-4.73067
ABCB7	YML029W	34	1.70293	-2.92024	0.37921	-1.81286	-4.02762
ABCB7	YDL243C	83	4.15715	-2.92134	0.831127	-0.493335	-5.34934
ABCB7	YJL020C	14	0.701206	-2.92792	0.8162	-0.538151	-5.31768
ABCB7	YHR202W	12	0.601034	-2.93342	0.919664	-0.235661	-5.63118
ABCB7	YDR317W	2	0.100172	-2.94322	0.746352	-0.746541	-5.13989
ABCB7	YDL155W	93	4.65801	-2.96245	0.641545	-1.0619	-4.86299
ABCB7	YJR111C	1	0.0500861	-2.96608	0.67523	-0.963293	-4.96886
ABCB7	YPL230W	12	0.601034	-2.9702	0.979302	-0.0614768	-5.87892
ABCB7	YML050W	31	1.55267	-2.9759	0.868458	-0.391457	-5.56035
ABCB7	YJR147W	97	4.85835	-2.97995	0.500619	-1.48813	-4.47177
ABCB7	YER071C	17	0.851464	-2.98528	0.82112	-0.534006	-5.43656
ABCB7	YNL294C	87	4.35749	-2.9864	0.673735	-0.974359	-4.99845
ABCB7	YPL247C	4	0.200345	-2.98825	0.609203	-1.1678	-4.80869
ABCB7	YJR014W	52	2.60448	-2.99095	0.590914	-1.22356	-4.75835
ABCB7	YER074W	6	0.300517	-3.01068	0.623417	-1.13377	-4.88758
ABCB7	YNL071W	16	0.801378	-3.01362	0.925947	-0.223168	-5.80407
ABCB7	YOR172W	11	0.550947	-3.01566	0.805843	-0.585509	-5.4458
ABCB7	YIL145C	48	2.40413	-3.01712	0.864501	-0.408816	-5.62543
ABCB7	YJL082W	32	1.60276	-3.01919	0.772426	-0.68709	-5.3513
ABCB7	YOR356W	3	0.150258	-3.01991	0.875146	-0.377046	-5.66277
ABCB7	YLL001W	8	0.400689	-3.03483	0.782852	-0.659009	-5.41066
ABCB7	YDL227C	144	7.2124	-3.03499	0.459018	-1.64188	-4.42811
ABCB7	YIL073C	191	9.56645	-3.04056	0.443334	-1.69258	-4.38854
ABCB7	YBR145W	15	0.751292	-3.04152	0.904818	-0.289499	-5.79355
ABCB7	YPL176C	15	0.751292	-3.04245	0.954614	-0.138084	-5.94682
ABCB7	YNL092W	45	2.25388	-3.04827	0.664745	-1.02195	-5.07458
ABCB7	YDL021W	4	0.200345	-3.04914	0.872388	-0.389107	-5.70917
ABCB7	YLL007C	77	3.85663	-3.06294	0.310419	-2.11215	-4.01374
ABCB7	YDR205W	16	0.801378	-3.07148	0.327082	-2.06685	-4.0761
ABCB7	YEL009C	7	0.350603	-3.08572	0.914218	-0.264699	-5.90674
ABCB7	YPL181W	7	0.350603	-3.09129	0.805991	-0.599738	-5.58284
ABCB7	YER151C	8	0.400689	-3.10293	0.909234	-0.281641	-5.92422
ABCB7	YOR141C	4	0.200345	-3.10337	0.844092	-0.483841	-5.7229
ABCB7	YJR150C	55	2.75474	-3.10456	0.638492	-1.12232	-5.08679
ABCB7	YMR158W	3	0.150258	-3.10699	0.575817	-1.31793	-4.89605
ABCB7	YIL010W	60	3.00517	-3.11076	0.543575	-1.41983	-4.80169
ABCB7	YDL222C	144	7.2124	-3.11233	0.517303	-1.50231	-4.72235
ABCB7	YBR246W	20	1.00172	-3.11454	0.683078	-0.987064	-5.24201
ABCB7	YNL068C	17	0.851464	-3.115	0.936977	-0.196317	-6.03368
ABCB7	YPL244C	8	0.400689	-3.12483	0.563639	-1.36355	-4.8861
ABCB7	YPL215W	1	0.0500861	-3.12495	0.807624	-0.601164	-5.64873
ABCB7	YJL016W	58	2.905	-3.13304	0.489039	-1.60086	-4.66521
ABCB7	YNL076W	17	0.851464	-3.13518	0.661469	-1.06136	-5.20901
ABCB7	YIL044C	3	0.150258	-3.13721	0.766444	-0.732714	-5.54171
ABCB7	YHR194W	1	0.0500861	-3.14064	0.551928	-1.40723	-4.87404
ABCB7	YOR214C	25	1.25215	-3.14277	0.839495	-0.504428	-5.7811
ABCB7	YBR090C-A	9	0.450775	-3.14733	0.570103	-1.35303	-4.94164
ABCB7	YMR193C-A	18	0.90155	-3.14768	0.802054	-0.623071	-5.67229
ABCB7	YHR144C	1	0.0500861	-3.14789	0.454203	-1.71811	-4.57767
ABCB7	YPL097W	3	0.150258	-3.15602	0.703422	-0.936007	-5.37603
ABCB7	YLR118C	234	11.7202	-3.15658	0.470796	-1.67048	-4.64269
ABCB7	YPL170W	9	0.450775	-3.16976	0.642922	-1.13185	-5.20766
ABCB7	YMR264W	30	1.50258	-3.17402	0.707007	-0.929966	-5.41808
ABCB7	YIL157C	18	0.90155	-3.18527	0.788692	-0.673074	-5.69747
ABCB7	YMR177W	55	2.75474	-3.22083	0.893816	-0.342003	-6.09967
ABCB7	YDL225W	21	1.05181	-3.22128	0.539773	-1.48252	-4.96004
ABCB7	YHR210C	1	0.0500861	-3.22194	0.17269	-2.66554	-3.77834
ABCB7	YOR339C	21	1.05181	-3.22196	0.631839	-1.1862	-5.25772
ABCB7	YJL099W	24	1.20207	-3.22433	0.658816	-1.10009	-5.34858
ABCB7	YOR139C	17	0.851464	-3.22445	0.63946	-1.16255	-5.28636
ABCB7	YJL007C	26	1.30224	-3.22925	0.699417	-0.970659	-5.48784
ABCB7	YBR245C	9	0.450775	-3.25167	0.800728	-0.647967	-5.85537
ABCB7	YER183C	4	0.200345	-3.25455	0.845231	-0.503704	-6.0054
ABCB7	YBL070C	13	0.65112	-3.25723	0.792758	-0.675035	-5.83942
ABCB7	YHR067W	1	0.0500861	-3.26321	0.833931	-0.541917	-5.98451
ABCB7	YMR215W	4	0.200345	-3.2712	0.845232	-0.506278	-6.03613
ABCB7	YBR030W	12	0.601034	-3.27338	0.592642	-1.33344	-5.21333
ABCB7	YCR006C	1	0.0500861	-3.27502	0.869178	-0.428443	-6.12159
ABCB7	YLR152C	20	1.00172	-3.28849	0.685814	-1.0332	-5.54379
ABCB7	YOR043W	22	1.10189	-3.29117	0.618818	-1.25453	-5.3278
ABCB7	YIL119C	11	0.550947	-3.29154	0.852086	-0.486865	-6.09621
ABCB7	YDR110W	36	1.8031	-3.29623	0.719193	-0.925603	-5.66686
ABCB7	YNL301C	9	0.450775	-3.29814	0.872742	-0.419715	-6.17656
ABCB7	YMR273C	21	1.05181	-3.30375	0.862775	-0.453358	-6.15414
ABCB7	YHR146W	8	0.400689	-3.31814	0.575201	-1.40954	-5.22674
ABCB7	YPL123C	4	0.200345	-3.32331	0.803278	-0.653769	-5.99285
ABCB7	YMR230W	5	0.250431	-3.32528	0.611688	-1.29125	-5.35932
ABCB7	YMR012W	60	3.00517	-3.32577	0.415534	-1.9438	-4.70775
ABCB7	YBR057C	31	1.55267	-3.32954	0.835144	-0.548894	-6.11018
ABCB7	YNL063W	138	6.91189	-3.33012	0.402633	-1.98931	-4.67094
ABCB7	YOL019W	8	0.400689	-3.33038	0.479478	-1.73353	-4.92722
ABCB7	YER079W	7	0.350603	-3.33241	0.578409	-1.40492	-5.25991
ABCB7	YOR156C	66	3.30568	-3.33576	0.774802	-0.751206	-5.92031
ABCB7	YDR100W	8	0.400689	-3.33682	0.788318	-0.706347	-5.9673
ABCB7	YCL011C	4	0.200345	-3.33937	0.514279	-1.622	-5.05674
ABCB7	YML116W	37	1.85319	-3.34087	0.760842	-0.798997	-5.88275
ABCB7	YOR185C	1	0.0500861	-3.34463	0.252462	-2.50024	-4.18902
ABCB7	YAL030W	20	1.00172	-3.34472	0.812051	-0.628636	-6.06081
ABCB7	YPL057C	3	0.150258	-3.3488	0.891393	-0.363704	-6.3339
ABCB7	YOR369C	2	0.100172	-3.35355	0.795442	-0.685994	-6.0211
ABCB7	YPL115C	8	0.400689	-3.35538	0.764178	-0.791274	-5.9195
ABCB7	YPL177C	21	1.05181	-3.35842	0.812681	-0.629098	-6.08775
ABCB7	YPL185W	41	2.05353	-3.35871	0.56662	-1.4556	-5.26182
ABCB7	YHR139C	9	0.450775	-3.35889	0.714869	-0.957724	-5.76006
ABCB7	YPL207W	2	0.100172	-3.3723	0.461462	-1.81611	-4.92849
ABCB7	YBL060W	101	5.0587	-3.37665	0.534981	-1.57021	-5.1831
ABCB7	YMR016C	5	0.250431	-3.37818	0.201476	-2.69756	-4.0588
ABCB7	YJR003C	11	0.550947	-3.38247	0.552888	-1.51235	-5.2526
ABCB7	YHR162W	1	0.0500861	-3.38449	0.935915	-0.216896	-6.55209
ABCB7	YCR021C	16	0.801378	-3.38566	0.768524	-0.783699	-5.98763
ABCB7	YOR047C	25	1.25215	-3.38855	0.694185	-1.03627	-5.74083
ABCB7	YER038W-A	20	1.00172	-3.40193	0.545231	-1.54709	-5.25676
ABCB7	YPL141C	22	1.10189	-3.41057	0.660915	-1.15647	-5.66467
ABCB7	YOR132W	1	0.0500861	-3.41768	0.36457	-2.1717	-4.66367
ABCB7	YHR181W	10	0.500861	-3.4265	0.672015	-1.12384	-5.72915
ABCB7	YAL026C	1	0.0500861	-3.43204	0.590673	-1.40483	-5.45925
ABCB7	YER007W	2	0.100172	-3.43738	0.467529	-1.8303	-5.04445
ABCB7	YHR200W	2	0.100172	-3.43752	0.644253	-1.22289	-5.65215
ABCB7	YJR121W	2	0.100172	-3.43868	0.643485	-1.22594	-5.65142
ABCB7	YOR316C	43	2.1537	-3.43968	0.424256	-1.98038	-4.89898
ABCB7	YJR024C	25	1.25215	-3.44674	0.760274	-0.826272	-6.06721
ABCB7	YBR131W	1	0.0500861	-3.44684	0.409757	-2.03447	-4.85921
ABCB7	YHR137W	1	0.0500861	-3.45776	0.405414	-2.05594	-4.85959
ABCB7	YOR085W	7	0.350603	-3.486	0.707229	-1.0206	-5.95139
ABCB7	YBR143C	1	0.0500861	-3.49671	0.730478	-0.942441	-6.05099
ABCB7	YLR021W	10	0.500861	-3.50156	0.694999	-1.06798	-5.93514
ABCB7	YLR011W	20	1.00172	-3.50424	0.41343	-2.05549	-4.953
ABCB7	YAR023C	2	0.100172	-3.50624	0.177089	-2.88532	-4.12715
ABCB7	YIL079C	3	0.150258	-3.50786	0.730317	-0.94601	-6.06972
ABCB7	YML019W	20	1.00172	-3.50984	0.638329	-1.2694	-5.75027
ABCB7	YBR114W	1	0.0500861	-3.51455	0.881516	-0.416417	-6.61269
ABCB7	YDL233W	678	33.9584	-3.53344	0.331881	-2.36076	-4.70612
ABCB7	YER060W-A	10	0.500861	-3.54692	0.609479	-1.38515	-5.70869
ABCB7	YBR015C	1	0.0500861	-3.55503	0.777094	-0.792438	-6.31762
ABCB7	YIL088C	41	2.05353	-3.5592	0.359229	-2.28063	-4.83777
ABCB7	YLR023C	14	0.701206	-3.55989	0.588836	-1.4637	-5.65608
ABCB7	YDR289C	1	0.0500861	-3.56047	0.717054	-1.00742	-6.11352
ABCB7	YNL052W	28	1.40241	-3.56205	0.784115	-0.768994	-6.35511
ABCB7	YDR029W	35	1.75301	-3.57025	0.405416	-2.12282	-5.01769
ABCB7	YML124C	1	0.0500861	-3.57319	0.360087	-2.28653	-4.85984
ABCB7	YBL055C	6	0.300517	-3.58373	0.89484	-0.376864	-6.79059
ABCB7	YER175C	5	0.250431	-3.58711	0.557891	-1.58589	-5.58832
ABCB7	YDL168W	56	2.80482	-3.5953	0.517537	-1.7346	-5.456
ABCB7	YJL116C	40	2.00345	-3.59666	0.613862	-1.38881	-5.80451
ABCB7	YLR205C	12	0.601034	-3.59765	0.664867	-1.20569	-5.98962
ABCB7	YPL060W	7	0.350603	-3.59833	0.735894	-0.950341	-6.24633
ABCB7	YJL181W	20	1.00172	-3.60442	0.827929	-0.620218	-6.58862
ABCB7	YLR151C	8	0.400689	-3.61547	0.566612	-1.5669	-5.66404
ABCB7	YHL016C	11	0.550947	-3.62062	0.77702	-0.807326	-6.43391
ABCB7	YDR218C	8	0.400689	-3.63459	0.23473	-2.78145	-4.48774
ABCB7	YOR113W	5	0.250431	-3.63717	0.621611	-1.37627	-5.89808
ABCB7	YLL014W	5	0.250431	-3.6415	0.786777	-0.776453	-6.50655
ABCB7	YPL070W	3	0.150258	-3.64508	0.675413	-1.18315	-6.10701
ABCB7	YIL163C	24	1.20207	-3.64921	0.743947	-0.934392	-6.36402
ABCB7	YLR032W	7	0.350603	-3.65187	0.671199	-1.20074	-6.103
ABCB7	YML048W	1	0.0500861	-3.65268	0.614673	-1.40747	-5.89788
ABCB7	YPL026C	1	0.0500861	-3.65614	0.584338	-1.51972	-5.79255
ABCB7	YOR018W	29	1.4525	-3.66133	0.581206	-1.53335	-5.78932
ABCB7	YHR029C	2	0.100172	-3.66331	0.436336	-2.06488	-5.26175
ABCB7	YDR314C	6	0.300517	-3.68237	0.703127	-1.09319	-6.27154
ABCB7	YIL140W	23	1.15198	-3.6828	0.613429	-1.42366	-5.94194
ABCB7	YJR125C	1	0.0500861	-3.69543	0.455277	-2.01299	-5.37788
ABCB7	YHR104W	20	1.00172	-3.69555	0.663976	-1.24179	-6.14931
ABCB7	YLR209C	17	0.851464	-3.69618	0.553273	-1.65118	-5.74118
ABCB7	YDR133C	13	0.65112	-3.70682	0.598491	-1.48832	-5.92531
ABCB7	YNL264C	21	1.05181	-3.71653	0.581166	-1.55661	-5.87645
ABCB7	YPL272C	3	0.150258	-3.73288	0.655876	-1.28457	-6.18119
ABCB7	YDL099W	8	0.400689	-3.73865	0.701337	-1.1166	-6.3607
ABCB7	YML103C	2	0.100172	-3.74796	0.583418	-1.56133	-5.93458
ABCB7	YLR193C	2	0.100172	-3.74829	0.768808	-0.866575	-6.63001
ABCB7	YDR022C	50	2.50431	-3.75182	0.708565	-1.09341	-6.41023
ABCB7	YDR001C	29	1.4525	-3.75469	0.788779	-0.793069	-6.71631
ABCB7	YIL173W	53	2.65456	-3.76768	0.426945	-2.15909	-5.37628
ABCB7	YCR022C	4	0.200345	-3.7697	0.6259	-1.41024	-6.12915
ABCB7	YMR228W	2	0.100172	-3.77255	0.935656	-0.24274	-7.30236
ABCB7	YML056C	22	1.10189	-3.78138	0.775134	-0.850304	-6.71246
ABCB7	YOR084W	16	0.801378	-3.80534	0.390219	-2.32042	-5.29026
ABCB7	YNL269W	24	1.20207	-3.80834	0.506874	-1.87799	-5.73869
ABCB7	YDR102C	19	0.951636	-3.81108	0.655097	-1.31445	-6.30771
ABCB7	YPL229W	13	0.65112	-3.81687	0.714557	-1.0895	-6.54425
ABCB7	YOR360C	1	0.0500861	-3.81936	0.489328	-1.95044	-5.68828
ABCB7	YNL200C	29	1.4525	-3.82037	0.720369	-1.06829	-6.57244
ABCB7	YER160C-A	2	0.100172	-3.8256	0.715787	-1.08729	-6.56391
ABCB7	YAL036C	24	1.20207	-3.83657	0.542314	-1.75595	-5.9172
ABCB7	YPL065W	4	0.200345	-3.83714	0.576578	-1.62473	-6.04955
ABCB7	YLR420W	4	0.200345	-3.84286	0.736048	-1.01433	-6.67139
ABCB7	YBL015W	17	0.851464	-3.84435	0.697038	-1.16469	-6.52401
ABCB7	YDR046C	64	3.20551	-3.84526	0.75429	-0.944818	-6.7457
ABCB7	YBR147W	38	1.90327	-3.84632	0.315504	-2.63279	-5.05985
ABCB7	YLL043W	14	0.701206	-3.84839	0.647837	-1.35526	-6.34152
ABCB7	YOR363C	2	0.100172	-3.85553	0.684063	-1.2181	-6.49295
ABCB7	YER158C	16	0.801378	-3.86263	0.780192	-0.849037	-6.87623
ABCB7	YBR105C	35	1.75301	-3.88565	0.557994	-1.71748	-6.05382
ABCB7	YOR136W	1	0.0500861	-3.89171	0.417913	-2.26531	-5.5181
ABCB7	YPL250C	10	0.500861	-3.89177	0.796616	-0.791522	-6.99202
ABCB7	YLR137W	22	1.10189	-3.90294	0.825165	-0.682371	-7.12351
ABCB7	YMR133W	22	1.10189	-3.90433	0.487537	-2.00082	-5.80783
ABCB7	YOL032W	16	0.801378	-3.90664	0.590552	-1.59957	-6.21372
ABCB7	YHR078W	133	6.66145	-3.90719	0.405632	-2.32231	-5.49207
ABCB7	YDL009C	17	0.851464	-3.92222	0.926206	-0.289435	-7.55501
ABCB7	YDR057W	18	0.90155	-3.92272	0.649959	-1.37311	-6.47233
ABCB7	YBR235W	40	2.00345	-3.92311	0.79837	-0.791016	-7.0552
ABCB7	YOR006C	22	1.10189	-3.9239	0.606728	-1.54316	-6.30465
ABCB7	YJL198W	3	0.150258	-3.9256	0.67666	-1.26931	-6.58189
ABCB7	YHR095W	7	0.350603	-3.92636	0.209703	-3.10299	-4.74973
ABCB7	YOR277C	2	0.100172	-3.92656	0.691121	-1.21283	-6.64029
ABCB7	YDR115W	1	0.0500861	-3.92876	0.696888	-1.19085	-6.66667
ABCB7	YNL198C	9	0.450775	-3.93426	0.634638	-1.43743	-6.43109
ABCB7	YER080W	12	0.601034	-3.9358	0.747274	-0.994679	-6.87692
ABCB7	YOR229W	4	0.200345	-3.93702	0.71415	-1.1254	-6.74864
ABCB7	YML122C	16	0.801378	-3.94589	0.610095	-1.53853	-6.35326
ABCB7	YER058W	5	0.250431	-3.95211	0.768305	-0.915684	-6.98854
ABCB7	YDL023C	6	0.300517	-3.9525	0.777009	-0.881373	-7.02363
ABCB7	YMR070W	4	0.200345	-3.9525	0.630475	-1.46055	-6.44446
ABCB7	YNL332W	7	0.350603	-3.95915	0.534463	-1.84313	-6.07517
ABCB7	YDR310C	5	0.250431	-3.96114	0.41524	-2.31631	-5.60596
ABCB7	YOR166C	30	1.50258	-3.96773	0.78941	-0.835562	-7.09989
ABCB7	YDL213C	3	0.150258	-3.97589	0.806123	-0.770835	-7.18094
ABCB7	YDL086W	2	0.100172	-3.98124	0.642514	-1.42324	-6.53925
ABCB7	YOR012W	61	3.05525	-3.98925	0.689164	-1.24	-6.7385
ABCB7	YLR165C	12	0.601034	-3.98954	0.499206	-1.99794	-5.98115
ABCB7	YPL136W	18	0.90155	-3.99268	0.457773	-2.16494	-5.82043
ABCB7	YEL016C	34	1.70293	-3.9972	0.424537	-2.30024	-5.69416
ABCB7	YOL052C	8	0.400689	-3.99942	0.722483	-1.10991	-6.88892
ABCB7	YLR012C	35	1.75301	-4.00111	0.393551	-2.42647	-5.57575
ABCB7	YER114C	4	0.200345	-4.00596	0.694441	-1.22406	-6.78786
ABCB7	YEL013W	5	0.250431	-4.01416	0.550597	-1.80398	-6.22435
ABCB7	YOL050C	6	0.300517	-4.03011	0.753127	-0.994926	-7.0653
ABCB7	YDR293C	1	0.0500861	-4.03643	0.308243	-2.79223	-5.28063
ABCB7	YHR016C	22	1.10189	-4.03957	0.677007	-1.30475	-6.77439
ABCB7	YMR175w	2	0.100172	-4.03984	0.454453	-2.20392	-5.87575
ABCB7	YML117W	2	0.100172	-4.04376	0.756216	-0.985802	-7.10171
ABCB7	YCL049C	21	1.05181	-4.04447	0.559186	-1.78286	-6.30608
ABCB7	YJR117W	705	35.3107	-4.06579	0.312827	-2.7939	-5.33768
ABCB7	YOR153W	3	0.150258	-4.07051	0.440267	-2.2784	-5.86262
ABCB7	YIL014W	5	0.250431	-4.07674	0.789626	-0.857638	-7.29584
ABCB7	YMR170C	37	1.85319	-4.07804	0.392354	-2.478	-5.67807
ABCB7	YHR124W	4	0.200345	-4.08053	0.902661	-0.397193	-7.76386
ABCB7	YOR038C	8	0.400689	-4.08746	0.811676	-0.769765	-7.40516
ABCB7	YNL326C	199	9.96714	-4.09516	0.262525	-3.02008	-5.17023
ABCB7	YJR060W	1	0.0500861	-4.10235	0.382955	-2.53133	-5.67336
ABCB7	YLR221C	1	0.0500861	-4.10609	0.638339	-1.48501	-6.72716
ABCB7	YHL032C	8	0.400689	-4.10861	0.850341	-0.614892	-7.60233
ABCB7	YMR182C	15	0.751292	-4.12109	0.668397	-1.36657	-6.87561
ABCB7	YPL270W	3	0.150258	-4.12846	0.491631	-2.09878	-6.15815
ABCB7	YER019C-A	7	0.350603	-4.13783	0.752729	-1.02317	-7.2525
ABCB7	YMR315W	40	2.00345	-4.14762	0.657624	-1.42005	-6.8752
ABCB7	YBL067C	26	1.30224	-4.15294	0.618774	-1.58321	-6.72267
ABCB7	YPL121C	8	0.400689	-4.15681	0.49703	-2.09075	-6.22287
ABCB7	YBR184W	2	0.100172	-4.15748	0.553191	-1.8576	-6.45736
ABCB7	YHR048W	1	0.0500861	-4.15793	0.427359	-2.381	-5.93485
ABCB7	YBR187W	7	0.350603	-4.16686	0.78289	-0.904667	-7.42905
ABCB7	YBR059C	8	0.400689	-4.17525	0.590424	-1.71008	-6.64042
ABCB7	YIL038C	11	0.550947	-4.17572	0.735715	-1.10358	-7.24786
ABCB7	YJL180C	1	0.0500861	-4.1812	0.414245	-2.44916	-5.91324
ABCB7	YBR006W	7	0.350603	-4.20292	0.5684	-1.81398	-6.59186
ABCB7	YLL016W	15	0.751292	-4.21307	0.621124	-1.59623	-6.82991
ABCB7	YJL080C	2	0.100172	-4.2153	0.729349	-1.14088	-7.28972
ABCB7	YJL120W	1	0.0500861	-4.21921	0.8655	-0.567484	-7.87094
ABCB7	YER130C	4	0.200345	-4.22418	0.187956	-3.43022	-5.01815
ABCB7	YDR149C	3	0.150258	-4.22436	0.498889	-2.11687	-6.33185
ABCB7	YJR069C	21	1.05181	-4.22889	0.519062	-2.03383	-6.42394
ABCB7	YMR180C	49	2.45422	-4.23908	0.523189	-2.02124	-6.45692
ABCB7	YAL015C	17	0.851464	-4.24155	0.480286	-2.2044	-6.27871
ABCB7	YDR306C	3	0.150258	-4.25942	0.593947	-1.72955	-6.7893
ABCB7	YEL038W	18	0.90155	-4.26617	0.473413	-2.24651	-6.28583
ABCB7	YNL127W	16	0.801378	-4.26619	0.660604	-1.44793	-7.08445
ABCB7	YIL117C	6	0.300517	-4.26718	0.406933	-2.53073	-6.00363
ABCB7	YIR004W	2	0.100172	-4.2801	0.500088	-2.13967	-6.42052
ABCB7	YNL193W	12	0.601034	-4.28385	0.451116	-2.35134	-6.21636
ABCB7	YOR384W	16	0.801378	-4.28812	0.621908	-1.6213	-6.95493
ABCB7	YBL057C	8	0.400689	-4.29715	0.483657	-2.2188	-6.3755
ABCB7	YDL125C	3	0.150258	-4.30461	0.394061	-2.60833	-6.00089
ABCB7	YBR158W	11	0.550947	-4.3233	0.446153	-2.39445	-6.25216
ABCB7	YBR101C	107	5.35922	-4.33048	0.419435	-2.51412	-6.14684
ABCB7	YLR034C	13	0.65112	-4.33125	0.44725	-2.3941	-6.26841
ABCB7	YJL105W	6	0.300517	-4.34369	0.403941	-2.5891	-6.09829
ABCB7	YOL028C	1	0.0500861	-4.3538	0.28787	-3.10047	-5.60713
ABCB7	YIL130W	3	0.150258	-4.36436	0.302772	-3.04296	-5.68577
ABCB7	YPL023C	13	0.65112	-4.36516	0.438618	-2.45052	-6.2798
ABCB7	YMR233W	26	1.30224	-4.39322	0.679228	-1.40922	-7.37723
ABCB7	YEL017C-A	4	0.200345	-4.40355	0.393927	-2.66887	-6.13823
ABCB7	YLR190W	1	0.0500861	-4.42229	0.317752	-3.0171	-5.82748
ABCB7	YMR039C	12	0.601034	-4.42826	0.754163	-1.08863	-7.7679
ABCB7	YHR136C	9	0.450775	-4.43302	0.474955	-2.32753	-6.5385
ABCB7	YDL033C	4	0.200345	-4.4527	0.492176	-2.26119	-6.64421
ABCB7	YDL046W	12	0.601034	-4.4542	0.433409	-2.52371	-6.38469
ABCB7	YNL211C	10	0.500861	-4.45434	0.528117	-2.10193	-6.80675
ABCB7	YOL043C	7	0.350603	-4.46031	0.560434	-1.9606	-6.96002
ABCB7	YNL226W	1	0.0500861	-4.46079	0.432824	-2.53005	-6.39152
ABCB7	YDL089W	6	0.300517	-4.47448	0.38419	-2.75543	-6.19353
ABCB7	YMR269W	1	0.0500861	-4.47596	0.277222	-3.23513	-5.7168
ABCB7	YDR008C	17	0.851464	-4.47877	0.43352	-2.53713	-6.4204
ABCB7	YBL099W	2	0.100172	-4.4802	0.404078	-2.66985	-6.29055
ABCB7	YBR113W	1	0.0500861	-4.4819	0.52841	-2.11362	-6.85018
ABCB7	YDR244W	11	0.550947	-4.48406	0.529854	-2.10816	-6.85996
ABCB7	YIL027C	1	0.0500861	-4.49589	0.429385	-2.56542	-6.42636
ABCB7	YJL095W	8	0.400689	-4.50104	0.751196	-1.11987	-7.8822
ABCB7	YDR117C	12	0.601034	-4.50446	0.669054	-1.49073	-7.51819
ABCB7	YMR316C-B	14	0.701206	-4.51063	0.555033	-2.00708	-7.01417
ABCB7	YJL084C	49	2.45422	-4.52144	0.667023	-1.50553	-7.53735
ABCB7	YDR111C	12	0.601034	-4.52194	0.477089	-2.36457	-6.6793
ABCB7	YMR007W	10	0.500861	-4.52386	0.447064	-2.5014	-6.54631
ABCB7	YNL249C	15	0.751292	-4.53137	0.476325	-2.37296	-6.68978
ABCB7	YML034W	3	0.150258	-4.53977	0.450635	-2.49399	-6.58555
ABCB7	YPL073C	10	0.500861	-4.54038	0.441656	-2.5351	-6.54567
ABCB7	YMR118C	18	0.90155	-4.55341	0.242948	-3.44717	-5.65966
ABCB7	YDL131W	9	0.450775	-4.55733	0.630444	-1.68419	-7.43047
ABCB7	YPL041C	6	0.300517	-4.56278	0.433622	-2.58426	-6.54131
ABCB7	YLL010C	23	1.15198	-4.57821	0.66482	-1.53452	-7.6219
ABCB7	YML084W	42	2.10362	-4.5784	0.35889	-2.93526	-6.22154
ABCB7	YCR014C	1	0.0500861	-4.57949	0.792103	-0.952061	-8.20692
ABCB7	YPL015C	27	1.35233	-4.5866	0.611203	-1.78326	-7.38995
ABCB7	YBL061C	7	0.350603	-4.60162	0.440348	-2.57531	-6.62794
ABCB7	YIL089W	80	4.00689	-4.61108	0.562241	-2.01854	-7.20361
ABCB7	YPL138C	11	0.550947	-4.61152	0.438352	-2.59005	-6.63299
ABCB7	YBL043W	1	0.0500861	-4.62654	0.39418	-2.80285	-6.45023
ABCB7	YJL093C	22	1.10189	-4.62669	0.622596	-1.74613	-7.50725
ABCB7	YIL121W	6	0.300517	-4.64002	0.33362	-3.09201	-6.18802
ABCB7	YMR199W	11	0.550947	-4.64678	0.452728	-2.54305	-6.7505
ABCB7	YIL020C	4	0.200345	-4.64895	0.197194	-3.73221	-5.5657
ABCB7	YMR210W	65	3.2556	-4.65158	0.455204	-2.53416	-6.76899
ABCB7	YDR143C	55	2.75474	-4.65481	0.327795	-3.12899	-6.18064
ABCB7	YOL041C	1	0.0500861	-4.66589	0.608619	-1.82614	-7.50565
ABCB7	YDL189W	73	3.65629	-4.67072	0.253078	-3.48867	-5.85278
ABCB7	YBR024W	38	1.90327	-4.67245	0.659216	-1.59229	-7.75261
ABCB7	YDR131C	16	0.801378	-4.67318	0.508691	-2.29598	-7.05039
ABCB7	YHR043C	7	0.350603	-4.69432	0.290672	-3.32981	-6.05883
ABCB7	YIL070C	35	1.75301	-4.70089	0.584633	-1.95259	-7.44918
ABCB7	YDR294C	6	0.300517	-4.70115	0.778127	-1.04306	-8.35925
ABCB7	YDL173W	55	2.75474	-4.70272	0.581431	-1.96841	-7.43703
ABCB7	YNL097C	13	0.65112	-4.71408	0.440251	-2.6387	-6.78946
ABCB7	YPL037C	3	0.150258	-4.72961	0.718968	-1.32917	-8.13005
ABCB7	YAL042W	8	0.400689	-4.73639	0.494424	-2.39461	-7.07818
ABCB7	YDL020C	1	0.0500861	-4.74239	0.526633	-2.24489	-7.23988
ABCB7	YBR068C	29	1.4525	-4.75548	0.869486	-0.620659	-8.89029
ABCB7	YDR059C	67	3.35577	-4.76238	0.415588	-2.78319	-6.74157
ABCB7	YJL132W	208	10.4179	-4.76874	0.486378	-2.44933	-7.08815
ABCB7	YML022W	8	0.400689	-4.77557	0.409052	-2.82211	-6.72902
ABCB7	YNL141W	37	1.85319	-4.7769	0.468385	-2.53947	-7.01433
ABCB7	YER148W-A	1	0.0500861	-4.79087	0.519462	-2.30219	-7.27954
ABCB7	YOL015W	1	0.0500861	-4.80641	0.198481	-3.85243	-5.76039
ABCB7	YBR138C	10	0.500861	-4.80973	0.45841	-2.6049	-7.01456
ABCB7	YIL166C	6	0.300517	-4.81011	0.440494	-2.69128	-6.92894
ABCB7	YJL052W	6	0.300517	-4.81096	0.410768	-2.83477	-6.78715
ABCB7	YIL135C	55	2.75474	-4.81418	0.339349	-3.18049	-6.44786
ABCB7	YBR008C	11	0.550947	-4.81926	0.412262	-2.83246	-6.80606
ABCB7	YMR159C	54	2.70465	-4.82309	0.392281	-2.93108	-6.7151
ABCB7	YDR089W	192	9.61654	-4.83054	0.498502	-2.42251	-7.23858
ABCB7	YOL037C	6	0.300517	-4.83977	0.375999	-3.02002	-6.65952
ABCB7	YHR109W	1	0.0500861	-4.8445	0.250939	-3.62883	-6.06017
ABCB7	YDL199C	32	1.60276	-4.85923	0.375535	-3.03442	-6.68404
ABCB7	YMR011W	13	0.65112	-4.88562	0.636446	-1.77619	-7.99505
ABCB7	YLR168C	7	0.350603	-4.89942	0.401241	-2.93357	-6.86527
ABCB7	YIL015C-A	1	0.0500861	-4.90664	0.381463	-3.03494	-6.77834
ABCB7	YOR135C	1	0.0500861	-4.90917	0.726864	-1.34087	-8.47747
ABCB7	YPL161C	2	0.100172	-4.91325	0.469592	-2.60603	-7.22048
ABCB7	YML016C	4	0.200345	-4.91439	0.553907	-2.19228	-7.63651
ABCB7	YCL028W	6	0.300517	-4.9353	0.668884	-1.63416	-8.23644
ABCB7	YNL083W	22	1.10189	-4.94793	0.255792	-3.68229	-6.21357
ABCB7	YBR157C	4	0.200345	-4.95354	0.51008	-2.42684	-7.48025
ABCB7	YOR234C	1	0.0500861	-4.96036	0.490118	-2.5292	-7.39152
ABCB7	YDR126W	1	0.0500861	-4.96819	0.896343	-0.514987	-9.4214
ABCB7	YDL211C	12	0.601034	-4.98818	0.363781	-3.17357	-6.80278
ABCB7	YPL084W	2	0.100172	-4.98937	0.551366	-2.2384	-7.74033
ABCB7	YNL129W	45	2.25388	-4.9924	0.505674	-2.46787	-7.51693
ABCB7	YDL136W	43	2.1537	-4.9931	0.429141	-2.85036	-7.13585
ABCB7	YMR253C	19	0.951636	-4.9939	0.386872	-3.0619	-6.9259
ABCB7	YNL183C	484	24.2417	-4.99673	0.152535	-4.23455	-5.75891
ABCB7	YER065C	2	0.100172	-4.99674	0.366228	-3.1668	-6.82669
ABCB7	YJL193W	7	0.350603	-5.00333	0.58925	-2.05512	-7.95155
ABCB7	YOL084W	35	1.75301	-5.03146	0.435436	-2.84058	-7.22233
ABCB7	YOR118W	12	0.601034	-5.03313	0.191269	-4.07045	-5.99581
ABCB7	YJR144W	3	0.150258	-5.04268	0.581527	-2.11023	-7.97513
ABCB7	YJL108C	14	0.701206	-5.04669	0.327018	-3.39633	-6.69705
ABCB7	YER046W-A	2	0.100172	-5.05601	0.561492	-2.2171	-7.89491
ABCB7	YHR125W	6	0.300517	-5.06328	0.434528	-2.86315	-7.26342
ABCB7	YML128C	5	0.250431	-5.06795	0.449286	-2.79099	-7.3449
ABCB7	YPL236C	1	0.0500861	-5.07023	0.292586	-3.58675	-6.55371
ABCB7	YIL071C	42	2.10362	-5.07358	0.42522	-2.9162	-7.23097
ABCB7	YDL241W	31	1.55267	-5.07471	0.404406	-3.02247	-7.12695
ABCB7	YLR133W	10	0.500861	-5.07879	0.427977	-2.90518	-7.25239
ABCB7	YNL187W	3	0.150258	-5.09347	0.447308	-2.81512	-7.37182
ABCB7	YNL307C	5	0.250431	-5.09382	0.52287	-2.43041	-7.75722
ABCB7	YAL008W	4	0.200345	-5.09572	0.432969	-2.88943	-7.30201
ABCB7	YDR230W	2	0.100172	-5.09644	0.391675	-3.10029	-7.09258
ABCB7	YDR297W	2	0.100172	-5.09737	0.278975	-3.67533	-6.51941
ABCB7	YOR124C	5	0.250431	-5.0984	0.317196	-3.48121	-6.71559
ABCB7	YOR309C	1	0.0500861	-5.10766	0.299218	-3.57935	-6.63596
ABCB7	YNL090W	42	2.10362	-5.11736	0.568103	-2.21018	-8.02455
ABCB7	YDR124W	30	1.50258	-5.11972	0.414683	-2.99666	-7.24278
ABCB7	YBR177C	2	0.100172	-5.12262	0.297659	-3.59782	-6.64741
ABCB7	YJL146W	10	0.500861	-5.12364	0.506499	-2.52852	-7.71876
ABCB7	YML067C	1	0.0500861	-5.13444	0.257738	-3.8111	-6.45777
ABCB7	YLR123C	14	0.701206	-5.13697	0.365954	-3.25707	-7.01686
ABCB7	YOL048C	3	0.150258	-5.16255	0.257349	-3.83397	-6.49113
ABCB7	YMR040W	4	0.200345	-5.17652	0.536719	-2.39819	-7.95486
ABCB7	YPL197C	1	0.0500861	-5.19	0.437185	-2.92101	-7.45899
ABCB7	YBR239C	19	0.951636	-5.1939	0.420438	-3.01019	-7.37761
ABCB7	YPL162C	5	0.250431	-5.20173	0.424946	-2.99128	-7.41219
ABCB7	YOL067C	3	0.150258	-5.20852	0.640276	-1.87363	-8.54342
ABCB7	YNL231C	3	0.150258	-5.21357	0.39134	-3.17329	-7.25385
ABCB7	YLR143W	2	0.100172	-5.23042	0.570358	-2.24721	-8.21364
ABCB7	YMR238W	11	0.550947	-5.23076	0.504053	-2.59418	-7.86733
ABCB7	YNL142W	2	0.100172	-5.23148	0.327645	-3.51741	-6.94555
ABCB7	YBR216C	10	0.500861	-5.23179	0.517836	-2.52258	-7.941
ABCB7	YNL056W	11	0.550947	-5.25862	0.403285	-3.1379	-7.37935
ABCB7	YLR204W	2	0.100172	-5.2634	0.390489	-3.2081	-7.3187
ABCB7	YAL023C	2	0.100172	-5.26411	0.25308	-3.93187	-6.59634
ABCB7	YIL114C	6	0.300517	-5.27283	0.308408	-3.64664	-6.89901
ABCB7	YCL055W	1	0.0500861	-5.27712	0.419523	-3.06324	-7.49099
ABCB7	YOL082W	11	0.550947	-5.29308	0.51791	-2.55174	-8.03442
ABCB7	YDR042C	33	1.65284	-5.33428	0.344056	-3.49899	-7.16958
ABCB7	YOR242C	4	0.200345	-5.33763	0.484363	-2.75228	-7.92298
ABCB7	YBR162W-A	11	0.550947	-5.33909	0.461439	-2.87543	-7.80275
ABCB7	YDL176W	248	12.4214	-5.33933	0.266138	-3.91833	-6.76032
ABCB7	YOR140W	82	4.10706	-5.34168	0.327977	-3.58973	-7.09363
ABCB7	YBR150C	12	0.601034	-5.35018	0.387124	-3.27899	-7.42136
ABCB7	YBL003C	4	0.200345	-5.35612	0.284279	-3.83349	-6.87875
ABCB7	YLL062C	34	1.70293	-5.35764	0.418378	-3.11612	-7.59916
ABCB7	YLR040C	3	0.150258	-5.36182	0.329902	-3.59294	-7.13069
ABCB7	YML038C	32	1.60276	-5.36622	0.397594	-3.23264	-7.4998
ABCB7	YOR321W	26	1.30224	-5.37463	0.471672	-2.83957	-7.9097
ABCB7	YLR094C	10	0.500861	-5.4101	0.325268	-3.65037	-7.16983
ABCB7	YPL264C	5	0.250431	-5.42606	0.392248	-3.2977	-7.55442
ABCB7	YBR139W	16	0.801378	-5.42757	0.517374	-2.61949	-8.23566
ABCB7	YBR249C	8	0.400689	-5.43092	0.415024	-3.17696	-7.68488
ABCB7	YDR237W	1	0.0500861	-5.44306	0.4114	-3.20378	-7.68234
ABCB7	YDL049C	10	0.500861	-5.44799	0.535003	-2.5333	-8.36268
ABCB7	YMR020W	45	2.25388	-5.45825	0.391086	-3.3236	-7.59289
ABCB7	YJR030C	12	0.601034	-5.46369	0.496857	-2.74902	-8.17837
ABCB7	YBR072W	25	1.25215	-5.48232	0.458854	-2.96673	-7.9979
ABCB7	YCL014W	69	3.45594	-5.48534	0.225226	-4.2499	-6.72078
ABCB7	YDR150W	1	0.0500861	-5.51269	0.37031	-3.47129	-7.55409
ABCB7	YLL058W	36	1.8031	-5.51518	0.439391	-3.09186	-7.93851
ABCB7	YBR005W	5	0.250431	-5.52285	0.476128	-2.89327	-8.15244
ABCB7	YML031W	29	1.4525	-5.5309	0.412247	-3.2508	-7.811
ABCB7	YPL219W	5	0.250431	-5.5314	0.295909	-3.89461	-7.1682
ABCB7	YEL020C	13	0.65112	-5.54255	0.311517	-3.81595	-7.26915
ABCB7	YDL146W	4	0.200345	-5.54984	0.474852	-2.91449	-8.18519
ABCB7	YHR032W	4	0.200345	-5.55357	0.343238	-3.64738	-7.45976
ABCB7	YIR014W	80	4.00689	-5.55514	0.339729	-3.66789	-7.44238
ABCB7	YOR245C	6	0.300517	-5.55925	0.341283	-3.66197	-7.45653
ABCB7	YNL229C	1	0.0500861	-5.58013	0.290912	-3.95681	-7.20346
ABCB7	YBR226C	21	1.05181	-5.59099	0.324687	-3.77567	-7.40631
ABCB7	YDR198C	8	0.400689	-5.60403	0.469664	-2.97202	-8.23604
ABCB7	YMR026C	1	0.0500861	-5.60482	0.347448	-3.65744	-7.5522
ABCB7	YOR087W	5	0.250431	-5.60834	0.307519	-3.88367	-7.33301
ABCB7	YLR041W	67	3.35577	-5.61128	0.383391	-3.45996	-7.76259
ABCB7	YML026C	1	0.0500861	-5.62238	0.265965	-4.12702	-7.11774
ABCB7	YIL090W	9	0.450775	-5.6235	0.383335	-3.46782	-7.77918
ABCB7	YDR193W	3	0.150258	-5.63578	0.312341	-3.87549	-7.39607
ABCB7	YER132C	4	0.200345	-5.64288	0.634091	-2.06478	-9.22097
ABCB7	YNL239W	14	0.701206	-5.6514	0.461455	-3.04353	-8.25926
ABCB7	YOR142W	7	0.350603	-5.67608	0.130436	-4.93572	-6.41645
ABCB7	YNL074C	150	7.51292	-5.695	0.289729	-4.045	-7.34501
ABCB7	YJL055W	11	0.550947	-5.70064	0.42758	-3.26316	-8.13812
ABCB7	YER171W	10	0.500861	-5.71501	0.3074	-3.95822	-7.47181
ABCB7	YLR218C	5	0.250431	-5.73216	0.463121	-3.07748	-8.38685
ABCB7	YOR243C	5	0.250431	-5.73722	0.373343	-3.59527	-7.87918
ABCB7	YPL267W	4	0.200345	-5.74539	0.426233	-3.29651	-8.19427
ABCB7	YMR163C	3	0.150258	-5.75369	0.280627	-4.13905	-7.36834
ABCB7	YOR062C	39	1.95336	-5.77235	0.228506	-4.45333	-7.09136
ABCB7	YBR233W	9	0.450775	-5.77525	0.253947	-4.30865	-7.24186
ABCB7	YAR047C	1	0.0500861	-5.77531	0.173615	-4.77263	-6.77799
ABCB7	YDR210W	9	0.450775	-5.77646	0.313529	-3.96537	-7.58755
ABCB7	YHL037C	1	0.0500861	-5.77688	0.343938	-3.78999	-7.76376
ABCB7	YER160C	13	0.65112	-5.78828	0.201196	-4.6237	-6.95285
ABCB7	YBR022W	10	0.500861	-5.79859	0.300033	-4.05882	-7.53836
ABCB7	YDR295C	1	0.0500861	-5.80294	0.27674	-4.19703	-7.40885
ABCB7	YOR002W	1	0.0500861	-5.80637	0.206983	-4.60455	-7.00819
ABCB7	YAL027W	12	0.601034	-5.83474	0.382282	-3.60422	-8.06525
ABCB7	YOL002C	4	0.200345	-5.83943	0.289378	-4.14962	-7.52923
ABCB7	YOR333C	37	1.85319	-5.85165	0.45503	-3.18897	-8.51432
ABCB7	YHR116W	3	0.150258	-5.85478	0.335802	-3.88874	-7.82083
ABCB7	YAL017W	6	0.300517	-5.8597	0.421357	-3.39067	-8.32872
ABCB7	YIL024C	5	0.250431	-5.86077	0.353615	-3.78832	-7.93323
ABCB7	YPL035C	4	0.200345	-5.86673	0.457306	-3.18384	-8.54962
ABCB7	YER057C	23	1.15198	-5.86907	0.307224	-4.06595	-7.67219
ABCB7	YBL080C	3	0.150258	-5.8725	0.34358	-3.85483	-7.89018
ABCB7	YMR004W	9	0.450775	-5.89238	0.392448	-3.57993	-8.20484
ABCB7	YLR102C	1	0.0500861	-5.9108	0.261613	-4.36446	-7.45715
ABCB7	YPL066W	2	0.100172	-5.92314	0.320222	-4.02643	-7.81986
ABCB7	YAR035W	3	0.150258	-5.92432	0.274158	-4.30012	-7.54852
ABCB7	YOR039W	3	0.150258	-5.97437	0.293315	-4.222	-7.72674
ABCB7	YBR219C	12	0.601034	-5.97661	0.428778	-3.41397	-8.53925
ABCB7	YBL104C	14	0.701206	-5.9798	0.412164	-3.51514	-8.44447
ABCB7	YHL006C	10	0.500861	-5.9893	0.297388	-4.20815	-7.77045
ABCB7	YHR110W	9	0.450775	-5.99149	0.393366	-3.63464	-8.34834
ABCB7	YDR169C	16	0.801378	-5.99725	0.456014	-3.26242	-8.73207
ABCB7	YER034W	3	0.150258	-6.02025	0.35026	-3.9116	-8.1289
ABCB7	YLL026W	11	0.550947	-6.02514	0.347992	-3.92844	-8.12185
ABCB7	YHL021C	1	0.0500861	-6.03867	0.241537	-4.58011	-7.49723
ABCB7	YOR054C	8	0.400689	-6.0433	0.35579	-3.89316	-8.19345
ABCB7	YER145C-A	19	0.951636	-6.052	0.487423	-3.10212	-9.00189
ABCB7	YJL192C	4	0.200345	-6.0625	0.27039	-4.42326	-7.70174
ABCB7	YAL022C	8	0.400689	-6.06303	0.327213	-4.07913	-8.04693
ABCB7	YER113C	3	0.150258	-6.06335	0.446605	-3.35543	-8.77127
ABCB7	YCR017C	1	0.0500861	-6.08549	0.348506	-3.96466	-8.20632
ABCB7	YHR177W	2	0.100172	-6.09113	0.280296	-4.38381	-7.79846
ABCB7	YOR350C	1	0.0500861	-6.09217	0.217839	-4.76506	-7.41928
ABCB7	YLR019W	930	46.5801	-6.10044	0.164208	-5.0987	-7.10219
ABCB7	YBR094W	7	0.350603	-6.10521	0.32587	-4.11571	-8.09471
ABCB7	YIL096C	27	1.35233	-6.11922	0.367017	-3.87336	-8.36508
ABCB7	YJL067W	37	1.85319	-6.12663	0.343437	-4.02252	-8.23074
ABCB7	YJR088C	1	0.0500861	-6.14086	0.241363	-4.65868	-7.62304
ABCB7	YAR003W	1	0.0500861	-6.14729	0.209896	-4.857	-7.43758
ABCB7	YDL214C	2	0.100172	-6.15641	0.427966	-3.52168	-8.79115
ABCB7	YMR010W	13	0.65112	-6.17185	0.446422	-3.4166	-8.9271
ABCB7	YML129C	1	0.0500861	-6.17218	0.159042	-5.19054	-7.15382
ABCB7	YDR155C	4	0.200345	-6.18621	0.332432	-4.12972	-8.2427
ABCB7	YHR134W	48	2.40413	-6.18875	0.294103	-4.36862	-8.00888
ABCB7	YOR267C	3	0.150258	-6.19277	0.361122	-3.95643	-8.42912
ABCB7	YLR176C	5	0.250431	-6.21213	0.342455	-4.08475	-8.3395
ABCB7	YLR042C	7	0.350603	-6.22706	0.287916	-4.43419	-8.01993
ABCB7	YOR365C	4	0.200345	-6.244	0.267669	-4.57267	-7.91532
ABCB7	YOL029C	2	0.100172	-6.25249	0.351509	-4.05469	-8.4503
ABCB7	YIL054W	16	0.801378	-6.26555	0.286615	-4.46975	-8.06135
ABCB7	YAR014C	3	0.150258	-6.27277	0.312575	-4.31206	-8.23348
ABCB7	YNL195C	15	0.751292	-6.28524	0.350261	-4.08377	-8.48671
ABCB7	YDR099W	5	0.250431	-6.32966	0.170379	-5.25122	-7.40811
ABCB7	YNL077W	6	0.300517	-6.34149	0.236904	-4.83917	-7.84381
ABCB7	YMR034C	28	1.40241	-6.34978	0.352627	-4.11067	-8.58888
ABCB7	YNL204C	7	0.350603	-6.37864	0.380483	-3.95168	-8.8056
ABCB7	YOR161C	123	6.16059	-6.42807	0.0842603	-5.88644	-6.9697
ABCB7	YDL134C	10	0.500861	-6.43206	0.314915	-4.40651	-8.45762
ABCB7	YPL114W	20	1.00172	-6.45478	0.369707	-4.0684	-8.84116
ABCB7	YLL019C	8	0.400689	-6.45623	0.309802	-4.45608	-8.45639
ABCB7	YBR053C	2	0.100172	-6.45896	0.211038	-5.09587	-7.82205
ABCB7	YOL055C	8	0.400689	-6.4754	0.288788	-4.60538	-8.34542
ABCB7	YDL053C	6	0.300517	-6.47654	0.305148	-4.50024	-8.45285
ABCB7	YNL179C	3	0.150258	-6.48216	0.285231	-4.63325	-8.33108
ABCB7	YBL008W	2	0.100172	-6.49825	0.27469	-4.71324	-8.28325
ABCB7	YER178W	12	0.601034	-6.49974	0.370607	-4.09089	-8.90859
ABCB7	YEL053C	4	0.200345	-6.50714	0.208647	-5.14945	-7.86483
ABCB7	YOR248W	3	0.150258	-6.52495	0.426978	-3.73894	-9.31095
ABCB7	YAL059W	1	0.0500861	-6.53274	0.218626	-5.10451	-7.96096
ABCB7	YOR201C	2	0.100172	-6.55558	0.379995	-4.0645	-9.04667
ABCB7	YPL257W	1	0.0500861	-6.56258	0.265029	-4.8233	-8.30185
ABCB7	YNL329C	27	1.35233	-6.56452	0.456001	-3.57109	-9.55794
ABCB7	YOR385W	10	0.500861	-6.56712	0.370584	-4.13345	-9.00079
ABCB7	YCL045C	2	0.100172	-6.56782	0.240197	-4.99025	-8.14539
ABCB7	YOR378W	22	1.10189	-6.59624	0.329134	-4.42519	-8.76728
ABCB7	YNL334C	1	0.0500861	-6.60985	0.25422	-4.9295	-8.29021
ABCB7	YOR099W	4	0.200345	-6.64082	0.411083	-3.91089	-9.37074
ABCB7	YDR006C	48	2.40413	-6.64347	0.355979	-4.27854	-9.00841
ABCB7	YPL259C	13	0.65112	-6.66116	0.342069	-4.38258	-8.93973
ABCB7	YIL059C	56	2.80482	-6.6836	0.428007	-3.82297	-9.54422
ABCB7	YOR344C	139	6.96197	-6.6922	0.266701	-4.90738	-8.47702
ABCB7	YOL065C	25	1.25215	-6.70785	0.526959	-3.17309	-10.2426
ABCB7	YBR007C	20	1.00172	-6.71606	0.270185	-4.90148	-8.53064
ABCB7	YDR112W	49	2.45422	-6.71616	0.221437	-5.22895	-8.20337
ABCB7	YJR146W	3177	159.124	-6.72203	0.10213	-6.0355	-7.40855
ABCB7	YMR194W	6	0.300517	-6.73986	0.442657	-3.75641	-9.7233
ABCB7	YPL182C	7	0.350603	-6.749	0.244285	-5.10032	-8.39768
ABCB7	YMR018W	57	2.85491	-6.74931	0.33851	-4.4646	-9.03403
ABCB7	YPL163C	7	0.350603	-6.78115	0.399738	-4.07047	-9.49183
ABCB7	YDR146C	15	0.751292	-6.79395	0.335906	-4.51182	-9.07608
ABCB7	YDL018C	9	0.450775	-6.80117	0.338127	-4.50151	-9.10083
ABCB7	YNL155W	12	0.601034	-6.80671	0.293555	-4.80856	-8.80486
ABCB7	YHR076W	3	0.150258	-6.81217	0.165479	-5.6849	-7.93945
ABCB7	YOR246C	8	0.400689	-6.8317	0.399891	-4.09977	-9.56363
ABCB7	YJL077C	63	3.15543	-6.83271	0.324409	-4.61612	-9.04931
ABCB7	YJL147C	15	0.751292	-6.84392	0.267697	-5.01182	-8.67601
ABCB7	YLR072W	13	0.65112	-6.84522	0.268992	-5.00391	-8.68653
ABCB7	YNL078W	74	3.70637	-6.85015	0.286679	-4.88636	-8.81395
ABCB7	YIL067C	6	0.300517	-6.85941	0.384583	-4.22139	-9.49742
ABCB7	YMR002W	2	0.100172	-6.85946	0.375703	-4.28234	-9.43658
ABCB7	YJL171C	22	1.10189	-6.86261	0.355173	-4.42519	-9.30002
ABCB7	YJL213W	3	0.150258	-6.86517	0.275406	-4.97447	-8.75588
ABCB7	YEL066W	15	0.751292	-6.86826	0.303079	-4.78663	-8.94988
ABCB7	YER120W	3	0.150258	-6.86915	0.280803	-4.94027	-8.79803
ABCB7	YER040W	62	3.10534	-6.86921	0.202059	-5.48122	-8.25719
ABCB7	YMR015C	5	0.250431	-6.87277	0.379716	-4.26307	-9.48247
ABCB7	YPL196W	15	0.751292	-6.90011	0.407441	-4.08872	-9.71151
ABCB7	YDL059C	3	0.150258	-6.91945	0.294938	-4.87863	-8.96026
ABCB7	YHL047C	8	0.400689	-6.97553	0.324773	-4.71006	-9.24099
ABCB7	YPL139C	1	0.0500861	-6.9896	0.15403	-5.91299	-8.06621
ABCB7	YJR100C	17	0.851464	-6.99897	0.339117	-4.6255	-9.37244
ABCB7	YJL170C	32	1.60276	-7.00087	0.166487	-5.83531	-8.16642
ABCB7	YDL038C	4	0.200345	-7.01708	0.228253	-5.41541	-8.61876
ABCB7	YHR114W	1	0.0500861	-7.02507	0.17765	-5.77707	-8.27306
ABCB7	YNL283C	5	0.250431	-7.0303	0.334678	-4.67741	-9.38319
ABCB7	YER005W	3	0.150258	-7.033	0.373893	-4.40341	-9.66259
ABCB7	YHL041W	146	7.31257	-7.05117	0.182822	-5.76206	-8.34028
ABCB7	YNL134C	14	0.701206	-7.06851	0.325039	-4.77097	-9.36605
ABCB7	YDR206W	9	0.450775	-7.06906	0.238289	-5.38459	-8.75354
ABCB7	YMR035W	6	0.300517	-7.07663	0.349398	-4.60407	-9.54919
ABCB7	YER108C	6	0.300517	-7.08826	0.355431	-4.56887	-9.60764
ABCB7	YJR108W	33	1.65284	-7.09661	0.251034	-5.31512	-8.87809
ABCB7	YDL184C	106	5.30913	-7.11523	0.428114	-4.06911	-10.1614
ABCB7	YML006C	11	0.550947	-7.14239	0.353981	-4.61412	-9.67066
ABCB7	YAR027W	17	0.851464	-7.15755	0.526417	-3.38969	-10.9254
ABCB7	YBL106C	3	0.150258	-7.15813	0.257221	-5.31691	-8.99935
ABCB7	YCL056C	7	0.350603	-7.1619	0.422343	-4.13712	-10.1867
ABCB7	YNL100W	16	0.801378	-7.16529	0.349131	-4.66367	-9.66692
ABCB7	YJL045W	18	0.90155	-7.1669	0.325631	-4.83314	-9.50066
ABCB7	YJL134W	20	1.00172	-7.17333	0.354637	-4.6294	-9.71726
ABCB7	YLR154C	1	0.0500861	-7.19355	0.158294	-6.05486	-8.33225
ABCB7	YDR239C	15	0.751292	-7.24004	0.413798	-4.24413	-10.2359
ABCB7	YPL263C	9	0.450775	-7.24298	0.413034	-4.25138	-10.2346
ABCB7	YPL058C	3	0.150258	-7.30186	0.281531	-5.24616	-9.35756
ABCB7	YOR100C	6	0.300517	-7.31541	0.305718	-5.07896	-9.55186
ABCB7	YOL071W	9	0.450775	-7.32051	0.193226	-5.906	-8.73503
ABCB7	YBR093C	6	0.300517	-7.34013	0.238826	-5.58712	-9.09314
ABCB7	YOR154W	1	0.0500861	-7.34523	0.165535	-6.12934	-8.56113
ABCB7	YMR317W	21	1.05181	-7.34775	0.368444	-4.64051	-10.055
ABCB7	YLL045C	6	0.300517	-7.36936	0.419798	-4.27571	-10.463
ABCB7	YLR121C	36	1.8031	-7.39714	0.391732	-4.49945	-10.2948
ABCB7	YOR291W	9	0.450775	-7.41053	0.237317	-5.65189	-9.16918
ABCB7	YML051W	41	2.05353	-7.41402	0.27775	-5.35477	-9.47327
ABCB7	YDR109C	20	1.00172	-7.42365	0.317409	-5.06731	-9.77999
ABCB7	YJR061W	19	0.951636	-7.46367	0.234177	-5.71585	-9.21148
ABCB7	YJR019C	45	2.25388	-7.46413	0.33358	-4.97425	-9.95402
ABCB7	YBR188C	9	0.450775	-7.47058	0.321703	-5.06727	-9.8739
ABCB7	YER020W	2	0.100172	-7.47758	0.104186	-6.69852	-8.25664
ABCB7	YLR080W	1	0.0500861	-7.47907	0.264194	-5.50315	-9.45499
ABCB7	YOR327C	276	13.8238	-7.48638	0.237112	-5.71127	-9.26149
ABCB7	YLR095C	4	0.200345	-7.53495	0.186491	-6.12976	-8.94015
ABCB7	YDL210W	13	0.65112	-7.5599	0.16681	-6.29884	-8.82097
ABCB7	YBR083W	6	0.300517	-7.57911	0.318242	-5.16712	-9.99109
ABCB7	YHL017W	17	0.851464	-7.57972	0.236527	-5.78691	-9.37252
ABCB7	YJL049W	32	1.60276	-7.5808	0.440397	-4.24224	-10.9194
ABCB7	YLR120C	2	0.100172	-7.61301	0.227466	-5.88131	-9.34471
ABCB7	YOR050C	21	1.05181	-7.65703	0.365391	-4.85922	-10.4548
ABCB7	YBR073W	4	0.200345	-7.65753	0.304336	-5.32707	-9.98799
ABCB7	YNL130C	15	0.751292	-7.71736	0.159371	-6.48743	-8.94728
ABCB7	YLR172C	8	0.400689	-7.75402	0.258493	-5.74966	-9.75838
ABCB7	YMR278W	11	0.550947	-7.81219	0.160993	-6.55449	-9.0699
ABCB7	YMR147W	73	3.65629	-7.82027	0.273435	-5.68193	-9.9586
ABCB7	YMR101C	2	0.100172	-7.88211	0.23832	-6.00365	-9.76057
ABCB7	YLR112W	58	2.905	-7.896	0.231858	-6.06525	-9.72675
ABCB7	YDL238C	1	0.0500861	-7.90002	0.172386	-6.53817	-9.26187
ABCB7	YDR335W	6	0.300517	-7.9745	0.22617	-6.17091	-9.7781
ABCB7	YBR050C	23	1.15198	-8.00554	0.311971	-5.50804	-10.503
ABCB7	YDR121W	9	0.450775	-8.04533	0.316744	-5.49702	-10.5936
ABCB7	YNL057W	25	1.25215	-8.08088	0.358882	-5.1808	-10.981
ABCB7	YNL087W	22	1.10189	-8.28228	0.202268	-6.60704	-9.95752
ABCB7	YDL026W	9	0.450775	-8.31881	0.244581	-6.28419	-10.3534
ABCB7	YDL204W	36	1.8031	-8.32639	0.222176	-6.47647	-10.1763
ABCB7	YAL065C	4	0.200345	-8.45543	0.280944	-6.07992	-10.8309
ABCB7	YDL183C	27	1.35233	-8.45575	0.187952	-6.86648	-10.045
ABCB7	YML089C	81	4.05698	-8.48143	0.383495	-5.22884	-11.734
ABCB7	YOR376W	19	0.951636	-8.53293	0.249429	-6.40457	-10.6613
ABCB7	YDL180W	1	0.0500861	-8.5495	0.0307523	-8.28658	-8.81242
ABCB7	YAR030C	7	0.350603	-8.56032	0.320698	-5.81505	-11.3056
ABCB7	YDL110C	14	0.701206	-8.70149	0.320994	-5.90836	-11.4946
ABCB7	YHR158C	4	0.200345	-8.73454	0.194655	-7.03431	-10.4348
ABCB7	YOR325W	55	2.75474	-8.82761	0.175554	-7.27789	-10.3773
ABCB7	YIL133C	1	0.0500861	-8.8533	0.148033	-7.54272	-10.1639
ABCB7	YNL327W	9	0.450775	-8.87861	0.263642	-6.53783	-11.2194
ABCB7	YDL218W	37	1.85319	-8.89523	0.360505	-5.68845	-12.102
ABCB7	YDL138W	79	3.9568	-8.92307	0.0541849	-8.43958	-9.40657
ABCB7	YLR104W	3	0.150258	-8.992	0.149172	-7.65064	-10.3334
ABCB7	YER056C-A	7	0.350603	-8.99309	0.280755	-6.46824	-11.5179
ABCB7	YLR125W	7	0.350603	-9.10421	0.211168	-7.1817	-11.0267
ABCB7	YLL056C	8	0.400689	-9.2608	0.234469	-7.08943	-11.4322
ABCB7	YAL034C	14	0.701206	-9.26922	0.169935	-7.69406	-10.8444
ABCB7	YBL062W	6	0.300517	-9.35946	0.192471	-7.55803	-11.1609
ABCB7	YHR045W	49	2.45422	-9.484	0.296531	-6.6717	-12.2963
ABCB7	YER172C	2	0.100172	-9.55948	0.0638984	-8.94864	-10.1703
ABCB7	YCL001W	2	0.100172	-10.1013	0.154016	-8.54555	-11.6571
ABCB7	YJL089W	18	0.90155	-10.1091	0.222205	-7.8628	-12.3554
ABCB7	YLR082C	11	0.550947	-10.1934	0.147343	-8.69143	-11.6953
ABCB7	YOR165W	1	0.0500861	-10.2948	0.149086	-8.75999	-11.8296
ABCB7	YDL134C-A	14	0.701206	-10.6714	0.183663	-8.7115	-12.6314
ABCB7	YMR114C	34	1.70293	-11.8286	0.204525	-9.40935	-14.2478
ABCB7	YDL156W	86	4.30741	-12.9398	0.201724	-10.3295	-15.5501
ABCB7	YBR064W	1	0.0500861	-13.9257	0.0479368	-13.2582	-14.5933
ABCB7	YMR247C	1	0.0500861	-14.7222	0.0503245	-13.9813	-15.4631
ACVR1	YLR055C	48	2.5558	17.6457	0.228103	13.6207	21.6708
ACVR1	YDL204W	111	5.91029	15.8382	0.211362	12.4906	19.1857
ACVR1	YDL161W	200	10.6492	13.8829	0.116718	12.2625	15.5033
ACVR1	YNL334C	16	0.851933	17.0579	0.3716	10.7192	23.3967
ACVR1	YOR301W	29	1.54413	14.4128	0.297537	10.1244	18.7011
ACVR1	YOR383C	29	1.54413	13.6954	0.29311	9.68117	17.7097
ACVR1	YER098W	86	4.57914	12.7419	0.27765	9.20408	16.2796
ACVR1	YOR139C	47	2.50255	12.6643	0.280864	9.10732	16.2212
ACVR1	YJR084W	99	5.27134	12.3156	0.265864	9.04133	15.5899
ACVR1	YBR227C	41	2.18308	12.4333	0.285627	8.88205	15.9846
ACVR1	YOR291W	43	2.28957	12.699	0.304819	8.82813	16.5699
ACVR1	YLR181C	19	1.01167	14.0873	0.401676	8.4288	19.7459
ACVR1	YBR177C	19	1.01167	12.8679	0.359206	8.24565	17.4901
ACVR1	YMR162C	77	4.09993	11.3843	0.320714	7.73322	15.0355
ACVR1	YLR113W	12	0.63895	13.7941	0.447418	7.62236	19.9658
ACVR1	YIL070C	67	3.56747	11.5885	0.343001	7.61367	15.5634
ACVR1	YHR133C	17	0.905179	13.4297	0.438579	7.53971	19.3197
ACVR1	YJR134C	85	4.52589	9.88999	0.23953	7.52104	12.2589
ACVR1	YDL241W	71	3.78045	10.7388	0.300952	7.50691	13.9706
ACVR1	YMR230W	21	1.11816	11.681	0.365246	7.41459	15.9475
ACVR1	YCL064C	31	1.65062	11.1866	0.337669	7.40925	14.964
ACVR1	YJR146W	4199	223.579	8.19528	0.102104	7.35851	9.03205
ACVR1	YDL125C	19	1.01167	11.4578	0.374406	7.16793	15.7477
ACVR1	YOR049C	19	1.01167	11.1082	0.37006	6.99753	15.219
ACVR1	YDL211C	40	2.12983	10.2827	0.331381	6.87522	13.6902
ACVR1	YER151C	22	1.17141	11.7183	0.414689	6.85883	16.5777
ACVR1	YLR013W	59	3.1415	9.902	0.307581	6.85634	12.9477
ACVR1	YDR101C	67	3.56747	9.70697	0.30033	6.79167	12.6223
ACVR1	YAL059W	15	0.798687	11.9078	0.430942	6.77626	17.0394
ACVR1	YLR176C	23	1.22465	11.26	0.411541	6.62606	15.894
ACVR1	YER057C	62	3.30124	9.58985	0.319151	6.52924	12.6505
ACVR1	YBL096C	31	1.65062	11.1647	0.415752	6.52293	15.8064
ACVR1	YBR058C	28	1.49088	10.0402	0.3693	6.33237	13.7481
ACVR1	YLR073C	58	3.08826	10.4569	0.395072	6.32569	14.5882
ACVR1	YPL052W	28	1.49088	9.90517	0.364347	6.29625	13.5141
ACVR1	YOR298W	122	6.49599	9.11565	0.311591	6.2753	11.956
ACVR1	YOL035C	19	1.01167	11.485	0.455501	6.25358	16.7164
ACVR1	YOR094W	146	7.77389	9.2716	0.328782	6.22327	12.3199
ACVR1	YOR058C	59	3.1415	11.0164	0.438153	6.18956	15.8433
ACVR1	YIL073C	288	15.3348	7.84293	0.22177	6.1036	9.58226
ACVR1	YNL057W	55	2.92852	10.567	0.422773	6.09955	15.0344
ACVR1	YPL179W	84	4.47265	9.23409	0.339847	6.09591	12.3723
ACVR1	YJR117W	900	47.9212	7.60201	0.199526	6.08521	9.1188
ACVR1	YMR182C	34	1.81036	10.3962	0.415279	6.07885	14.7135
ACVR1	YOR376W	55	2.92852	9.79917	0.379773	6.07771	13.5206
ACVR1	YLR070C	40	2.12983	10.9766	0.454522	5.98748	15.9657
ACVR1	YNL128W	34	1.81036	9.27389	0.355913	5.97319	12.5746
ACVR1	YJL146W	28	1.49088	10.4637	0.429566	5.96883	14.9585
ACVR1	YDL138W	372	19.8074	6.99168	0.150149	5.94189	8.04147
ACVR1	YMR193C-A	38	2.02334	9.75421	0.392519	5.9255	13.5829
ACVR1	YPL101W	16	0.851933	11.7652	0.50122	5.86822	17.6621
ACVR1	YDR092W	23	1.22465	10.4277	0.438965	5.85031	15.0051
ACVR1	YPL191C	24	1.2779	11.0724	0.472057	5.8456	16.2992
ACVR1	YDR153C	1421	75.6623	7.13152	0.182847	5.82754	8.4355
ACVR1	YNL085W	52	2.76878	10.093	0.425341	5.80006	14.386
ACVR1	YNL120C	14	0.745441	9.82965	0.413355	5.76652	13.8928
ACVR1	YDR152W	57	3.03501	8.91495	0.356986	5.73244	12.0975
ACVR1	YJL073W	216	11.5011	7.48376	0.254242	5.58108	9.38645
ACVR1	YJR121W	11	0.585704	10.7673	0.485428	5.54053	15.994
ACVR1	YER004W	24	1.2779	9.51261	0.425336	5.46655	13.5587
ACVR1	YOR083W	54	2.87527	9.15654	0.405055	5.44764	12.8655
ACVR1	YOR005C	117	6.22976	8.35394	0.353516	5.40069	11.3072
ACVR1	YIL110W	38	2.02334	9.40864	0.432069	5.34346	13.4738
ACVR1	YIL016W	17	0.905179	9.84177	0.466352	5.25204	14.4315
ACVR1	YDR272W	44	2.34282	8.51457	0.385692	5.23056	11.7986
ACVR1	YCL045C	17	0.905179	9.68378	0.462886	5.20129	14.1663
ACVR1	YDL187C	113	6.01678	8.05858	0.361624	5.1444	10.9728
ACVR1	YJR130C	100	5.32458	8.25778	0.377281	5.14227	11.3733
ACVR1	YMR011W	29	1.54413	9.94999	0.485849	5.1158	14.7842
ACVR1	YHL040C	24	1.2779	9.4692	0.472559	4.99445	13.944
ACVR1	YER180C	99	5.27134	7.58754	0.343988	4.97752	10.1976
ACVR1	YBR258C	34	1.81036	9.25018	0.465739	4.94201	13.5584
ACVR1	YDR154C	20	1.06492	8.99306	0.462826	4.83084	13.1553
ACVR1	YLR038C	21	1.11816	8.09785	0.404804	4.81981	11.3759
ACVR1	YJL055W	30	1.59737	8.97197	0.462855	4.81925	13.1247
ACVR1	YDR247W	14	0.745441	10.3456	0.5342	4.81898	15.8722
ACVR1	YOR090C	68	3.62072	7.60751	0.366616	4.81848	10.3966
ACVR1	YER066C-A	16	0.851933	9.22636	0.480083	4.79694	13.6558
ACVR1	YNL193W	33	1.75711	8.09054	0.410118	4.77246	11.4086
ACVR1	YJL213W	18	0.958425	9.35791	0.491011	4.76307	13.9528
ACVR1	YHL016C	25	1.33115	9.14015	0.483137	4.7242	13.5561
ACVR1	YML058W	42	2.23632	8.11998	0.422319	4.69076	11.5492
ACVR1	YPL111W	15	0.798687	9.65209	0.517551	4.65664	14.6475
ACVR1	YIL137C	42	2.23632	8.52898	0.456611	4.63456	12.4234
ACVR1	YER055C	157	8.35959	6.06734	0.236604	4.63178	7.50289
ACVR1	YOR384W	34	1.81036	8.65921	0.467426	4.61167	12.7067
ACVR1	YNL160W	19	1.01167	8.97351	0.486159	4.61096	13.3361
ACVR1	YPL092W	16	0.851933	10.2078	0.552415	4.56886	15.8467
ACVR1	YHR121W	53	2.82203	7.72158	0.410177	4.55437	10.8888
ACVR1	YML113W	28	1.49088	7.46673	0.390812	4.54864	10.3848
ACVR1	YPL053C	14	0.745441	9.59497	0.529886	4.51073	14.6792
ACVR1	YML020W	21	1.11816	8.37788	0.46804	4.4567	12.2991
ACVR1	YDR008C	41	2.18308	7.53711	0.414649	4.41185	10.6624
ACVR1	YPL273W	14	0.745441	8.60603	0.49202	4.37169	12.8404
ACVR1	YML080W	40	2.12983	7.10807	0.385062	4.37102	9.84511
ACVR1	YDR034C	21	1.11816	7.7884	0.445574	4.31809	11.2587
ACVR1	YBL036C	27	1.43764	8.51988	0.499499	4.26421	12.7756
ACVR1	YLR165C	31	1.65062	7.57724	0.43749	4.26227	10.8922
ACVR1	YJR153W	91	4.84537	6.95553	0.390382	4.24022	9.67084
ACVR1	YMR159C	95	5.05835	6.85076	0.382851	4.22794	9.47359
ACVR1	YOL015W	16	0.851933	7.54305	0.44129	4.21438	10.8717
ACVR1	YMR157C	38	2.02334	7.82927	0.46183	4.21347	11.4451
ACVR1	YBR262C	67	3.56747	7.85682	0.463862	4.21234	11.5013
ACVR1	YOR268C	32	1.70387	7.98353	0.477413	4.17209	11.795
ACVR1	YJR116W	115	6.12327	6.8471	0.395531	4.13885	9.55534
ACVR1	YDL172C	59	3.1415	6.43405	0.361118	4.11059	8.7575
ACVR1	YER092W	21	1.11816	8.27528	0.503567	4.10812	12.4424
ACVR1	YLR211C	35	1.8636	7.20506	0.429966	4.10713	10.303
ACVR1	YDL233W	832	44.3005	5.46325	0.251088	4.09149	6.83501
ACVR1	YPL114W	45	2.39606	7.80425	0.475949	4.08982	11.5187
ACVR1	YJL197W	18	0.958425	8.55749	0.523145	4.08068	13.0343
ACVR1	YOR215C	20	1.06492	7.96935	0.48851	4.07624	11.8625
ACVR1	YMR278W	49	2.60904	6.6726	0.399335	4.008	9.3372
ACVR1	YDR030C	72	3.8337	6.55732	0.389958	4.00025	9.1144
ACVR1	YOR101W	15	0.798687	9.55269	0.58158	3.99704	15.1083
ACVR1	YLR189C	20	1.06492	8.38813	0.523537	3.99663	12.7796
ACVR1	YMR176W	95	5.05835	7.52804	0.474453	3.95634	11.0997
ACVR1	YDR009W	59	3.1415	7.19519	0.456783	3.90855	10.4818
ACVR1	YNL098C	24	1.2779	8.0544	0.520529	3.86185	12.247
ACVR1	YDL118W	60	3.19475	6.69563	0.424595	3.8527	9.53856
ACVR1	YDR102C	37	1.9701	7.4422	0.488681	3.80534	11.0791
ACVR1	YOR089C	27	1.43764	7.83082	0.515931	3.79066	11.871
ACVR1	YCR001W	9	0.479212	9.71329	0.61226	3.76623	15.6603
ACVR1	YHR140W	20	1.06492	8.9458	0.579999	3.75724	14.1344
ACVR1	YEL066W	40	2.12983	7.24587	0.483663	3.74131	10.7504
ACVR1	YPL181W	18	0.958425	7.85783	0.525875	3.72559	11.9901
ACVR1	YOR208W	12	0.63895	9.93283	0.625959	3.71529	16.1504
ACVR1	YMR316W	43	2.28957	7.00616	0.472048	3.69892	10.3134
ACVR1	YNL183C	728	38.763	4.6769	0.209875	3.69534	5.65846
ACVR1	YOR311C	11	0.585704	9.05673	0.593138	3.68484	14.4286
ACVR1	YOR061W	13	0.692196	7.53444	0.515097	3.65347	11.4154
ACVR1	YML031W	56	2.98177	6.9379	0.476376	3.63285	10.2429
ACVR1	YHR167W	16	0.851933	9.20234	0.608556	3.6022	14.8025
ACVR1	YOR027W	59	3.1415	7.19493	0.501417	3.58726	10.8026
ACVR1	YJR131W	45	2.39606	5.70588	0.372817	3.57863	7.83312
ACVR1	YJL152W	23	1.22465	8.13532	0.564225	3.54516	12.7255
ACVR1	YLL030C	54	2.87527	7.16661	0.509902	3.51234	10.8209
ACVR1	YBL010C	22	1.17141	7.55973	0.537162	3.49893	11.6205
ACVR1	YJL005W	14	0.745441	9.36822	0.627166	3.49279	15.2436
ACVR1	YDL074C	69	3.67396	5.56674	0.373328	3.48852	7.64496
ACVR1	YBL095W	387	20.6061	5.10122	0.317889	3.4796	6.72285
ACVR1	YHR097C	21	1.11816	8.34219	0.584126	3.4693	13.2151
ACVR1	YNL130C	57	3.03501	5.81496	0.416625	3.3923	8.23761
ACVR1	YNL322C	138	7.34792	5.88255	0.423483	3.39139	8.37371
ACVR1	YIL173W	91	4.84537	5.58175	0.395316	3.37519	7.78831
ACVR1	YDL219W	47	2.50255	7.28057	0.536611	3.37374	11.1874
ACVR1	YAL039C	12	0.63895	7.57399	0.55588	3.36376	11.7842
ACVR1	YLR044C	20	1.06492	7.69867	0.567069	3.33299	12.0643
ACVR1	YDL137W	275	14.6426	6.04045	0.450396	3.31986	8.76104
ACVR1	YLR164W	44	2.34282	6.28884	0.474993	3.30169	9.276
ACVR1	YER079W	20	1.06492	6.59932	0.509051	3.23993	9.9587
ACVR1	YLR019W	1187	63.2028	4.40026	0.27132	3.20638	5.59414
ACVR1	YEL040W	40	2.12983	6.90978	0.540923	3.17212	10.6474
ACVR1	YJL043W	62	3.30124	6.79768	0.536624	3.14988	10.4455
ACVR1	YDR181C	21	1.11816	7.83879	0.599327	3.14079	12.5368
ACVR1	YMR012W	102	5.43107	5.01756	0.375694	3.1325	6.90263
ACVR1	YIL029C	22	1.17141	7.17828	0.572068	3.07181	11.2847
ACVR1	YDL237W	82	4.36616	6.57984	0.537184	3.04525	10.1144
ACVR1	YJL177W	18	0.958425	7.40266	0.593273	3.01086	11.7944
ACVR1	YLL019C	26	1.38439	6.67446	0.551771	2.99168	10.3572
ACVR1	YLL007C	139	7.40117	4.32346	0.308486	2.98973	5.65719
ACVR1	YJR024C	42	2.23632	6.51981	0.545564	2.96283	10.0768
ACVR1	YDR067C	18	0.958425	8.34038	0.647589	2.93924	13.7415
ACVR1	YMR183C	17	0.905179	6.86317	0.57516	2.91575	10.8106
ACVR1	YDR130C	36	1.91685	7.16657	0.593249	2.91501	11.4181
ACVR1	YMR031C	27	1.43764	7.59827	0.616716	2.91229	12.2843
ACVR1	YPL207W	11	0.585704	6.53502	0.558519	2.88509	10.1849
ACVR1	YJR133W	109	5.80379	5.46843	0.477828	2.85546	8.08141
ACVR1	YDL036C	25	1.33115	7.10728	0.599871	2.84383	11.3707
ACVR1	YBR053C	16	0.851933	6.57487	0.568847	2.83478	10.315
ACVR1	YDR032C	36	1.91685	8.20887	0.6568	2.81728	13.6005
ACVR1	YLR017W	43	2.28957	7.5582	0.627531	2.81519	12.3012
ACVR1	YOL085C	45	2.39606	5.41194	0.483308	2.7963	8.02757
ACVR1	YPL241C	12	0.63895	8.11793	0.656192	2.79101	13.4449
ACVR1	YOR239W	15	0.798687	6.50132	0.571365	2.78669	10.2159
ACVR1	YAL027W	30	1.59737	6.41749	0.56805	2.77203	10.0629
ACVR1	YDL239C	45	2.39606	5.4705	0.495785	2.75831	8.18269
ACVR1	YBL051C	6	0.319475	10.0028	0.726353	2.73725	17.2684
ACVR1	YAR031W	36	1.91685	6.78673	0.597372	2.73252	10.8409
ACVR1	YIL125W	10	0.532458	8.53884	0.683402	2.70338	14.3743
ACVR1	YJL132W	257	13.6842	5.40421	0.503257	2.6845	8.12391
ACVR1	YHL041W	242	12.8855	4.37876	0.396432	2.64288	6.11464
ACVR1	YBR028C	13	0.692196	7.07395	0.628349	2.62904	11.5188
ACVR1	YOR012W	85	4.52589	6.03115	0.565916	2.61803	9.44428
ACVR1	YOR382W	37	1.9701	5.86571	0.555133	2.60946	9.12196
ACVR1	YBL098W	47	2.50255	5.30424	0.50933	2.60263	8.00584
ACVR1	YMR127C	35	1.8636	6.46468	0.600486	2.58273	10.3466
ACVR1	YCL073C	40	2.12983	5.89883	0.56588	2.5608	9.23686
ACVR1	YDR261C	16	0.851933	7.14864	0.643696	2.54709	11.7502
ACVR1	YHR057C	32	1.70387	6.06268	0.5802	2.54511	9.58025
ACVR1	YLL060C	54	2.87527	4.96203	0.492812	2.51668	7.40737
ACVR1	YBR043C	28	1.49088	6.0345	0.585054	2.50399	9.56501
ACVR1	YPL203W	80	4.25967	6.97602	0.647125	2.46166	11.4904
ACVR1	YLR168C	21	1.11816	5.93871	0.589047	2.44053	9.43688
ACVR1	YOR374W	15	0.798687	6.09969	0.60237	2.42542	9.77397
ACVR1	YBR249C	22	1.17141	6.27194	0.614165	2.41994	10.1239
ACVR1	YML038C	58	3.08826	5.40935	0.554144	2.41179	8.40691
ACVR1	YML007W	34	1.81036	6.418	0.624526	2.40979	10.4262
ACVR1	YMR139W	19	1.01167	8.62141	0.720896	2.40627	14.8366
ACVR1	YBL069W	42	2.23632	6.04396	0.60466	2.38942	9.6985
ACVR1	YLR118C	293	15.601	4.13982	0.423592	2.38622	5.89341
ACVR1	YMR294W-A	15	0.798687	6.1908	0.616589	2.37362	10.008
ACVR1	YCL074W	90	4.79212	5.28681	0.5517	2.37008	8.20355
ACVR1	YOR188W	55	2.92852	6.00609	0.605684	2.36829	9.64388
ACVR1	YIL052C	40	2.12983	5.4789	0.570354	2.35399	8.60381
ACVR1	YER056C	107	5.6973	4.6271	0.492338	2.34901	6.9052
ACVR1	YER106W	158	8.41284	4.57931	0.490324	2.33397	6.82466
ACVR1	YOR065W	30	1.59737	5.50947	0.576488	2.33333	8.68561
ACVR1	YCL035C	10	0.532458	6.71441	0.654224	2.32168	11.1071
ACVR1	YDL223C	108	5.75055	4.3136	0.4642	2.31123	6.31597
ACVR1	YMR283C	25	1.33115	4.77579	0.517789	2.30294	7.24864
ACVR1	YLL020C	23	1.22465	5.76804	0.603022	2.28979	9.24629
ACVR1	YIL124W	52	2.76878	5.61927	0.595994	2.27022	8.96831
ACVR1	YLR217W	16	0.851933	6.48944	0.650765	2.26634	10.7125
ACVR1	YMR155W	36	1.91685	6.39897	0.64986	2.24054	10.5574
ACVR1	YER121W	29	1.54413	6.56197	0.660519	2.22767	10.8963
ACVR1	YDR178W	14	0.745441	6.42313	0.654474	2.21936	10.6269
ACVR1	YMR105C	12	0.63895	6.25244	0.645635	2.21564	10.2892
ACVR1	YIL166C	18	0.958425	5.92289	0.633276	2.17207	9.67372
ACVR1	YDR304C	22	1.17141	6.26269	0.656379	2.15199	10.3734
ACVR1	YLL052C	25	1.33115	6.40021	0.666968	2.13148	10.6689
ACVR1	YBR169C	53	2.82203	6.0724	0.649446	2.12871	10.0161
ACVR1	YOR142W	42	2.23632	3.90583	0.455892	2.12519	5.68647
ACVR1	YML100W-A	31	1.65062	6.31523	0.664483	2.11886	10.5116
ACVR1	YMR280C	20	1.06492	5.04493	0.580483	2.11644	7.97342
ACVR1	YER050C	6	0.319475	6.42308	0.671552	2.10965	10.7365
ACVR1	YHR152W	10	0.532458	6.95029	0.696562	2.10898	11.7916
ACVR1	YIL108W	43	2.28957	5.19099	0.593887	2.10813	8.27386
ACVR1	YPL182C	26	1.38439	5.33052	0.604629	2.10754	8.5535
ACVR1	YBR106W	8	0.425967	6.32983	0.668886	2.0959	10.5638
ACVR1	YJR051W	70	3.72721	5.09677	0.592592	2.07647	8.11708
ACVR1	YHR113W	10	0.532458	6.93198	0.702354	2.06328	11.8007
ACVR1	YOR381W	59	3.1415	4.68995	0.56172	2.05551	7.32438
ACVR1	YDL091C	16	0.851933	6.02781	0.659012	2.05541	10.0002
ACVR1	YER042W	17	0.905179	6.40273	0.688846	1.99223	10.8132
ACVR1	YAL034C	47	2.50255	4.91376	0.595696	1.98665	7.84086
ACVR1	YPL067C	22	1.17141	5.72378	0.654057	1.9801	9.46747
ACVR1	YEL039C	31	1.65062	5.83838	0.663055	1.96721	9.70955
ACVR1	YLR003C	90	4.79212	4.34219	0.555484	1.93017	6.75421
ACVR1	YDL227C	191	10.17	3.60819	0.468194	1.91886	5.29752
ACVR1	YLL028W	54	2.87527	5.46405	0.651855	1.90228	9.02582
ACVR1	YNL274C	310	16.5062	3.76607	0.495196	1.90113	5.63101
ACVR1	YDR256C	28	1.49088	4.86856	0.609942	1.89902	7.83809
ACVR1	YLR034C	29	1.54413	4.87057	0.616713	1.86683	7.87431
ACVR1	YDR244W	24	1.2779	5.49442	0.662988	1.85169	9.13716
ACVR1	YDL094C	20	1.06492	5.78479	0.684533	1.82491	9.74466
ACVR1	YER034W	13	0.692196	6.18126	0.711047	1.78609	10.5764
ACVR1	YHR184W	26	1.38439	6.10305	0.71037	1.76762	10.4385
ACVR1	YDR033W	75	3.99344	4.52458	0.611266	1.75886	7.29031
ACVR1	YHR096C	7	0.372721	5.99929	0.70817	1.75077	10.2478
ACVR1	YOR016C	38	2.02334	4.09374	0.572488	1.75013	6.43736
ACVR1	YDL197C	68	3.62072	4.65659	0.626374	1.73982	7.57335
ACVR1	YLR136C	17	0.905179	6.1018	0.716047	1.73262	10.471
ACVR1	YBR263W	16	0.851933	4.86014	0.643763	1.73136	7.98892
ACVR1	YML052W	64	3.40773	4.78831	0.63868	1.73011	7.84651
ACVR1	YEL006W	10	0.532458	7.33295	0.764405	1.7276	12.9383
ACVR1	YJR097W	178	9.47776	3.66564	0.530341	1.7216	5.60968
ACVR1	YPL121C	20	1.06492	5.07873	0.663459	1.7092	8.44826
ACVR1	YMR167W	23	1.22465	5.81064	0.706709	1.70421	9.91707
ACVR1	YMR237W	24	1.2779	6.05458	0.720949	1.68954	10.4196
ACVR1	YLL024C	25	1.33115	4.37528	0.614779	1.68545	7.06511
ACVR1	YPL234C	10	0.532458	6.69913	0.748476	1.68499	11.7133
ACVR1	YHR200W	8	0.425967	6.17978	0.729097	1.67412	10.6854
ACVR1	YLR037C	24	1.2779	5.36435	0.689501	1.66562	9.06308
ACVR1	YBR148W	39	2.07659	5.03575	0.673083	1.64627	8.42522
ACVR1	YPL100W	48	2.5558	5.27705	0.691602	1.62743	8.92667
ACVR1	YOR059C	61	3.24799	3.57742	0.546694	1.62167	5.53318
ACVR1	YML047C	5	0.266229	6.20957	0.740225	1.61309	10.8061
ACVR1	YHR124W	10	0.532458	7.64663	0.789146	1.61232	13.6809
ACVR1	YEL038W	35	1.8636	4.5424	0.646169	1.60724	7.47755
ACVR1	YPL116W	42	2.23632	3.69249	0.565355	1.60492	5.78006
ACVR1	YOR284W	70	3.72721	4.66018	0.659032	1.58897	7.73138
ACVR1	YCR010C	10	0.532458	6.32149	0.751453	1.57119	11.0718
ACVR1	YBR170C	25	1.33115	5.25239	0.701754	1.5665	8.93827
ACVR1	YMR252C	101	5.37783	3.83311	0.592696	1.56124	6.10498
ACVR1	YLR016C	125	6.65573	3.44525	0.548451	1.5557	5.33481
ACVR1	YIL117C	18	0.958425	4.58783	0.673069	1.4999	7.67575
ACVR1	YOR161C	294	15.6543	2.33038	0.369744	1.46873	3.19202
ACVR1	YOR220W	17	0.905179	5.2613	0.723228	1.45618	9.06641
ACVR1	YOR386W	14	0.745441	6.58373	0.780212	1.44702	11.7204
ACVR1	YLL027W	5	0.266229	7.17281	0.799493	1.4382	12.9074
ACVR1	YCR004C	34	1.81036	5.35477	0.734908	1.41951	9.29002
ACVR1	YMR180C	72	3.8337	4.21679	0.669681	1.39289	7.04069
ACVR1	YDR043C	73	3.88694	3.12504	0.556833	1.38491	4.86517
ACVR1	YDL236W	101	5.37783	3.70522	0.631182	1.36655	6.04389
ACVR1	YOL072W	9	0.479212	5.5362	0.753751	1.36328	9.70913
ACVR1	YJL048C	62	3.30124	5.02104	0.729434	1.35852	8.68355
ACVR1	YAL036C	41	2.18308	4.19268	0.67821	1.34916	7.0362
ACVR1	YJL138C	19	1.01167	4.48252	0.701804	1.33667	7.62837
ACVR1	YJL067W	64	3.40773	4.21629	0.685559	1.32577	7.10681
ACVR1	YHR189W	19	1.01167	5.89364	0.776587	1.31672	10.4706
ACVR1	YOR044W	12	0.63895	6.0656	0.78597	1.29822	10.833
ACVR1	YLL058W	58	3.08826	4.49097	0.717083	1.27057	7.71137
ACVR1	YHR144C	7	0.372721	4.82491	0.736874	1.26956	8.38026
ACVR1	YDL200C	30	1.59737	4.04696	0.691431	1.24877	6.84515
ACVR1	YNL157W	13	0.692196	4.19283	0.703037	1.24511	7.14055
ACVR1	YHR159W	20	1.06492	5.48787	0.773159	1.24488	9.73086
ACVR1	YAL014C	28	1.49088	4.45552	0.72428	1.22848	7.68257
ACVR1	YOR248W	11	0.585704	6.6539	0.815418	1.22819	12.0796
ACVR1	YOR344C	196	10.4362	3.45209	0.644943	1.22569	5.6785
ACVR1	YOR264W	23	1.22465	5.71165	0.788359	1.20882	10.2145
ACVR1	YLR014C	61	3.24799	3.55311	0.662631	1.19871	5.90751
ACVR1	YLR207W	20	1.06492	4.75912	0.750222	1.18872	8.32952
ACVR1	YDL110C	32	1.70387	5.53575	0.787761	1.1749	9.89659
ACVR1	YDR210W	25	1.33115	4.26183	0.725566	1.16959	7.35407
ACVR1	YMR285C	68	3.62072	4.40759	0.737134	1.15861	7.65658
ACVR1	YNL214W	78	4.15317	3.37848	0.662304	1.1409	5.61606
ACVR1	YNL168C	21	1.11816	5.47411	0.792317	1.13688	9.81134
ACVR1	YMR123W	8	0.425967	4.19545	0.730676	1.12993	7.26097
ACVR1	YOR137C	10	0.532458	6.27577	0.820869	1.12419	11.4274
ACVR1	YML009c	271	14.4296	3.12801	0.641568	1.12118	5.13484
ACVR1	YIL042C	16	0.851933	4.94438	0.773992	1.11747	8.77128
ACVR1	YMR156C	27	1.43764	4.38252	0.746881	1.1093	7.65574
ACVR1	YMR166C	43	2.28957	4.26621	0.741618	1.10231	7.43011
ACVR1	YDR171W	70	3.72721	3.66351	0.702803	1.08878	6.23824
ACVR1	YBR188C	24	1.2779	5.12369	0.788469	1.08382	9.16356
ACVR1	YBR235W	55	2.92852	4.94376	0.781392	1.08075	8.80678
ACVR1	YML057W	27	1.43764	4.08964	0.737987	1.07154	7.10774
ACVR1	YER007W	9	0.479212	4.45117	0.760666	1.06532	7.83702
ACVR1	YDR007W	52	2.76878	3.009	0.650518	1.05159	4.96641
ACVR1	YJR109C	102	5.43107	3.22159	0.678479	1.03581	5.40738
ACVR1	YDR198C	19	1.01167	5.22107	0.80216	1.03294	9.4092
ACVR1	YOR306C	54	2.87527	4.99217	0.794657	1.02511	8.95924
ACVR1	YDL124W	26	1.38439	3.89183	0.737093	1.02319	6.76047
ACVR1	YDR003W	27	1.43764	4.51753	0.773534	1.02307	8.012
ACVR1	YDL133W	51	2.71554	3.84627	0.734079	1.0228	6.66973
ACVR1	YOR099W	13	0.692196	6.05402	0.831232	1.02172	11.0863
ACVR1	YBR054W	27	1.43764	4.76544	0.787777	1.01134	8.51955
ACVR1	YER185W	45	2.39606	3.64412	0.723031	1.00931	6.27892
ACVR1	YDR253C	14	0.745441	4.0718	0.758373	0.983856	7.15974
ACVR1	YDL078C	21	1.11816	5.36968	0.817119	0.982011	9.75734
ACVR1	YOL071W	32	1.70387	3.67417	0.732803	0.981727	6.36661
ACVR1	YOR304C-A	21	1.11816	4.23371	0.769959	0.973926	7.49349
ACVR1	YOR283W	39	2.07659	4.07896	0.762183	0.970047	7.18788
ACVR1	YNL259C	26	1.38439	4.40553	0.779823	0.969997	7.84107
ACVR1	YER172C	39	2.07659	3.13148	0.694255	0.957432	5.30552
ACVR1	YBR239C	36	1.91685	4.08672	0.766056	0.956062	7.21737
ACVR1	YNL129W	66	3.51422	4.14963	0.772798	0.942806	7.35645
ACVR1	YMR110C	25	1.33115	4.51353	0.793529	0.931912	8.09514
ACVR1	YDL190C	35	1.8636	4.34715	0.789023	0.91715	7.77715
ACVR1	YMR229C	6	0.319475	5.96584	0.846321	0.916821	11.0148
ACVR1	YIR003W	413	21.9905	1.98564	0.540388	0.912622	3.05865
ACVR1	YDL085W	13	0.692196	4.91331	0.815696	0.905541	8.92108
ACVR1	YDR026C	70	3.72721	3.09757	0.710762	0.895937	5.29921
ACVR1	YDL217C	9	0.479212	5.12031	0.82695	0.88607	9.35455
ACVR1	YEL017W	7	0.372721	5.76812	0.848924	0.871424	10.6648
ACVR1	YNL075W	10	0.532458	4.49025	0.807556	0.864123	8.11639
ACVR1	YHR018C	31	1.65062	3.20179	0.731141	0.860832	5.54275
ACVR1	YDL170W	151	8.04012	3.34226	0.751175	0.831636	5.85288
ACVR1	YDR305C	8	0.425967	6.14214	0.865633	0.825304	11.459
ACVR1	YHR111W	5	0.266229	5.03579	0.836544	0.823129	9.24846
ACVR1	YLR218C	14	0.745441	5.37464	0.846887	0.822927	9.92636
ACVR1	YDR260C	8	0.425967	5.41018	0.848194	0.821297	9.99907
ACVR1	YJL112W	79	4.20642	3.03074	0.729251	0.82057	5.24092
ACVR1	YMR276W	102	5.43107	3.46144	0.765017	0.813378	6.10949
ACVR1	YNL122C	83	4.4194	2.51851	0.67772	0.811663	4.22535
ACVR1	YNL293W	28	1.49088	4.15313	0.806346	0.804272	7.50199
ACVR1	YER163C	16	0.851933	4.53246	0.825867	0.78925	8.27568
ACVR1	YIL155C	22	1.17141	3.65041	0.785797	0.781929	6.51889
ACVR1	YPL133C	42	2.23632	3.78186	0.794951	0.775465	6.78825
ACVR1	YLR169W	7	0.372721	5.78943	0.866543	0.772638	10.8062
ACVR1	YPL223C	32	1.70387	3.61817	0.786895	0.77105	6.46529
ACVR1	YPL220W	13	0.692196	4.17405	0.818341	0.758254	7.58985
ACVR1	YDL180W	87	4.63239	1.88189	0.614112	0.7262	3.03759
ACVR1	YLR058C	47	2.50255	3.38353	0.796047	0.690081	6.07698
ACVR1	YDR057W	30	1.59737	4.13098	0.833261	0.688795	7.57317
ACVR1	YIR005W	6	0.319475	5.43133	0.874827	0.679855	10.1828
ACVR1	YDR028C	95	5.05835	1.40879	0.534609	0.655641	2.16195
ACVR1	YBL080C	12	0.63895	4.6778	0.866302	0.625411	8.73019
ACVR1	YEL013W	13	0.692196	4.28517	0.856419	0.615267	7.95507
ACVR1	YML108W	18	0.958425	4.88522	0.875153	0.609907	9.16053
ACVR1	YDL234C	15	0.798687	4.0422	0.849251	0.609357	7.47503
ACVR1	YHR198C	17	0.905179	4.41123	0.86256	0.606278	8.21618
ACVR1	YIL105C	50	2.66229	4.00777	0.849683	0.602437	7.41311
ACVR1	YER141W	13	0.692196	4.89616	0.879681	0.589102	9.20321
ACVR1	YLR068W	12	0.63895	5.4157	0.892243	0.58358	10.2478
ACVR1	YLL055W	21	1.11816	3.53603	0.835505	0.581658	6.49041
ACVR1	YER097W	11	0.585704	5.73243	0.900568	0.569987	10.8949
ACVR1	YHR136C	20	1.06492	3.80768	0.854216	0.555101	7.06026
ACVR1	YBR250W	20	1.06492	4.29907	0.871014	0.554519	8.04362
ACVR1	YER074W	14	0.745441	3.47857	0.851128	0.517862	6.43928
ACVR1	YBR074W	43	2.28957	2.98595	0.828077	0.513353	5.45854
ACVR1	YBR059C	17	0.905179	4.22864	0.881192	0.502397	7.95488
ACVR1	YBR219C	25	1.33115	4.33564	0.884446	0.501	8.17027
ACVR1	YJL101C	30	1.59737	3.21987	0.846135	0.495425	5.94432
ACVR1	YHR092C	10	0.532458	5.24448	0.905816	0.493948	9.99501
ACVR1	YLR092W	16	0.851933	5.06646	0.910354	0.45419	9.67873
ACVR1	YBR141C	25	1.33115	3.73579	0.879276	0.451001	7.02058
ACVR1	YDL070W	11	0.585704	3.72068	0.879067	0.449954	6.9914
ACVR1	YCL076W	34	1.81036	3.73992	0.880679	0.446252	7.03358
ACVR1	YOR151C	20	1.06492	3.31959	0.866238	0.444036	6.19515
ACVR1	YBR205W	59	3.1415	4.02845	0.892452	0.433251	7.62365
ACVR1	YJR127C	67	3.56747	4.14712	0.895893	0.431745	7.8625
ACVR1	YPL104W	5	0.266229	3.39515	0.873112	0.430802	6.35949
ACVR1	YJR014W	71	3.78045	2.57435	0.84326	0.403503	4.7452
ACVR1	YHR157W	4	0.212983	6.70554	0.942788	0.383639	13.0274
ACVR1	YJL027C	46	2.44931	2.71703	0.862206	0.374391	5.05967
ACVR1	YOR225W	16	0.851933	3.85378	0.904659	0.367424	7.34014
ACVR1	YDR128W	56	2.98177	2.5779	0.865092	0.347779	4.80802
ACVR1	YMR003W	28	1.49088	4.04743	0.916112	0.339531	7.75534
ACVR1	YDR206W	27	1.43764	3.30127	0.898525	0.334998	6.26754
ACVR1	YER109C	49	2.60904	2.5807	0.8714	0.331878	4.82953
ACVR1	YJR152W	142	7.56091	2.24718	0.860995	0.312369	4.18199
ACVR1	YAR037W	28	1.49088	5.51683	0.944522	0.306064	10.7276
ACVR1	YJL052W	16	0.851933	3.61601	0.916622	0.301496	6.93052
ACVR1	YMR206W	37	1.9701	3.95104	0.925222	0.295453	7.60664
ACVR1	YBR067C	38	2.02334	3.29668	0.911844	0.290621	6.30273
ACVR1	YDL192W	12	0.63895	3.93628	0.926866	0.287877	7.58467
ACVR1	YNL093W	52	2.76878	2.78196	0.897831	0.284231	5.27969
ACVR1	YBL005W	25	1.33115	3.21295	0.915752	0.270686	6.15522
ACVR1	YML054C	36	1.91685	2.27577	0.882166	0.268163	4.28338
ACVR1	YDR147W	6	0.319475	6.24059	0.957582	0.264716	12.2165
ACVR1	YDR031W	58	3.08826	1.91837	0.86896	0.251384	3.58535
ACVR1	YHR035W	119	6.33625	2.99396	0.918836	0.243003	5.74493
ACVR1	YOR213C	11	0.585704	3.83959	0.937172	0.241232	7.43794
ACVR1	YBL060W	126	6.70897	2.36137	0.900534	0.234877	4.48786
ACVR1	YNL105W	28	1.49088	2.27917	0.897158	0.234394	4.32394
ACVR1	YJR113C	9	0.479212	4.83783	0.955836	0.21366	9.462
ACVR1	YML002W	18	0.958425	3.39029	0.942345	0.195467	6.58512
ACVR1	YER182W	16	0.851933	3.74992	0.948157	0.194406	7.30543
ACVR1	YMR158W-A	22	1.17141	3.63383	0.948817	0.185989	7.08167
ACVR1	YJL070C	76	4.04668	2.45479	0.926608	0.180162	4.72942
ACVR1	YHR086W	142	7.56091	2.87279	0.937766	0.178786	5.5668
ACVR1	YER089C	33	1.75711	4.0585	0.956109	0.178131	7.93887
ACVR1	YOR112W	12	0.63895	3.89918	0.954615	0.176963	7.6214
ACVR1	YDL240W	38	2.02334	3.45962	0.951497	0.1678	6.75143
ACVR1	YBR072W	41	2.18308	3.52917	0.954483	0.160639	6.89771
ACVR1	YDL229W	66	3.51422	2.61202	0.94121	0.153562	5.07048
ACVR1	YLR123C	29	1.54413	2.95314	0.950221	0.147006	5.75928
ACVR1	YER038W-A	33	1.75711	2.62217	0.949688	0.131927	5.1124
ACVR1	YIL086C	16	0.851933	4.99933	0.974743	0.126269	9.8724
ACVR1	YJR043C	16	0.851933	3.42595	0.968137	0.109162	6.74274
ACVR1	YDL012C	54	2.87527	2.48245	0.960799	0.0973135	4.86758
ACVR1	YBR045C	49	2.60904	3.77636	0.975208	0.093622	7.4591
ACVR1	YJL170C	73	3.88694	1.90627	0.951088	0.0932401	3.71931
ACVR1	YDL222C	172	9.15828	1.94558	0.954569	0.0883905	3.80277
ACVR1	YOR150W	5	0.266229	7.09228	0.987737	0.0869718	14.0976
ACVR1	YIL020C	19	1.01167	2.03618	0.959442	0.0825841	3.98977
ACVR1	YHR151C	15	0.798687	3.31724	0.975968	0.0797209	6.55475
ACVR1	YAL026C	5	0.266229	4.55486	0.982917	0.0778097	9.03191
ACVR1	YMR306W	44	2.34282	3.66894	0.978973	0.0771481	7.26073
ACVR1	YIL114C	18	0.958425	2.95072	0.97444	0.0754196	5.82601
ACVR1	YAL067C	42	2.23632	3.36289	0.979827	0.0678397	6.65793
ACVR1	YAL066W	22	1.17141	3.58522	0.987914	0.0433306	7.1271
ACVR1	YBL001C	19	1.01167	3.85696	0.996315	0.0142113	7.69972
ACVR1	YJR095W	33	1.75711	3.04799	0.995484	0.0137654	6.08221
ACVR1	YOR034C	37	1.9701	1.06536	0.99562	0.00466663	2.12605
ACVR1	YAR014C	12	0.63895	3.92557	0.999162	0.00329106	7.84785
ACVR1	YNL294C	25	1.33115	-15.6251	0.0777911	-14.4096	-16.8406
ACVR1	YML119W	12	0.63895	-13.9983	0.136529	-12.0871	-15.9094
ACVR1	YDL142C	30	1.59737	-12.9387	0.0992218	-11.6549	-14.2225
ACVR1	YDL162C	5	0.266229	-11.7187	0.116928	-10.3484	-13.0889
ACVR1	YJL182C	2	0.106492	-11.6091	0.115041	-10.2736	-12.9446
ACVR1	YML099C	1	0.0532458	-11.6677	0.132221	-10.125	-13.2105
ACVR1	YJL133W	7	0.372721	-10.8977	0.162627	-9.12543	-12.6699
ACVR1	YBR259W	5	0.266229	-10.4201	0.129795	-9.06762	-11.7726
ACVR1	YBL068W	5	0.266229	-11.4629	0.22393	-8.89601	-14.0298
ACVR1	YDR049W	1	0.0532458	-10.7228	0.182154	-8.7696	-12.676
ACVR1	YMR209C	2	0.106492	-9.83737	0.111129	-8.74415	-10.9306
ACVR1	YOL070C	2	0.106492	-9.67556	0.125051	-8.46562	-10.8855
ACVR1	YER060W	5	0.266229	-9.59846	0.120319	-8.44358	-10.7533
ACVR1	YBR046C	8	0.425967	-9.60856	0.135956	-8.30222	-10.9149
ACVR1	YLR188W	10	0.532458	-10.4129	0.23587	-7.95678	-12.869
ACVR1	YBR187W	2	0.106492	-9.9411	0.200975	-7.94319	-11.939
ACVR1	YJR126C	8	0.425967	-10.5216	0.246608	-7.92691	-13.1163
ACVR1	YIL159W	6	0.319475	-9.67365	0.193209	-7.80462	-11.5427
ACVR1	YOR053W	14	0.745441	-9.75521	0.204576	-7.75953	-11.7509
ACVR1	YMR111C	12	0.63895	-9.91308	0.226782	-7.66497	-12.1612
ACVR1	YAL005C	9	0.479212	-9.81743	0.226338	-7.59538	-12.0395
ACVR1	YNL071W	6	0.319475	-9.49421	0.200005	-7.59532	-11.3931
ACVR1	YER178W	7	0.372721	-9.52482	0.210053	-7.5241	-11.5255
ACVR1	YLR122C	15	0.798687	-8.92595	0.157103	-7.52365	-10.3282
ACVR1	YCR005C	3	0.159737	-9.70881	0.22761	-7.49899	-11.9186
ACVR1	YPL164C	3	0.159737	-8.54461	0.123534	-7.48906	-9.60016
ACVR1	YER030W	27	1.43764	-9.40674	0.218584	-7.35058	-11.4629
ACVR1	YNL072W	11	0.585704	-9.32517	0.216356	-7.30761	-11.3427
ACVR1	YMR292W	8	0.425967	-9.68601	0.24724	-7.29124	-12.0808
ACVR1	YIL002C	3	0.159737	-8.75286	0.172076	-7.2467	-10.259
ACVR1	YBR010W	5	0.266229	-8.7194	0.183779	-7.11695	-10.3218
ACVR1	YER118C	4	0.212983	-8.87724	0.215687	-6.96253	-10.7919
ACVR1	YBR150C	6	0.319475	-8.5478	0.18874	-6.93449	-10.1611
ACVR1	YDR006C	38	2.02334	-9.14641	0.245574	-6.90029	-11.3925
ACVR1	YMR304C-A	27	1.43764	-8.69039	0.210205	-6.86363	-10.5171
ACVR1	YJL036W	11	0.585704	-8.50452	0.20121	-6.79333	-10.2157
ACVR1	YIL041W	1	0.0532458	-8.26069	0.184245	-6.7387	-9.78268
ACVR1	YMR234W	16	0.851933	-8.52531	0.220393	-6.64639	-10.4042
ACVR1	YOR064C	20	1.06492	-9.85217	0.328873	-6.61206	-13.0923
ACVR1	YMR017W	3	0.159737	-8.05957	0.192925	-6.50468	-9.61447
ACVR1	YNL295W	7	0.372721	-7.80138	0.167517	-6.49451	-9.10824
ACVR1	YDL184C	92	4.89862	-9.46275	0.319018	-6.44396	-12.4815
ACVR1	YML060W	6	0.319475	-8.11342	0.207008	-6.43387	-9.79296
ACVR1	YLL001W	2	0.106492	-7.78295	0.176913	-6.40604	-9.15985
ACVR1	YEL001C	1	0.0532458	-7.99709	0.201556	-6.38523	-9.60895
ACVR1	YNL332W	2	0.106492	-7.68502	0.170113	-6.3777	-8.99234
ACVR1	YJL044C	17	0.905179	-7.95523	0.200613	-6.3593	-9.55115
ACVR1	YDR326C	12	0.63895	-6.89174	0.0871345	-6.29123	-7.49225
ACVR1	YLL046C	19	1.01167	-8.57395	0.271029	-6.25016	-10.8977
ACVR1	YOR190W	1	0.0532458	-7.85747	0.206509	-6.23484	-9.48011
ACVR1	YML001W	1	0.0532458	-7.16414	0.133475	-6.20791	-8.12037
ACVR1	YBL066C	13	0.692196	-8.8114	0.295773	-6.20523	-11.4176
ACVR1	YJL095W	4	0.212983	-8.81467	0.296369	-6.20227	-11.4271
ACVR1	YPL172C	2	0.106492	-8.22496	0.246767	-6.19531	-10.2546
ACVR1	YMR174c	8	0.425967	-8.02193	0.236133	-6.12769	-9.91618
ACVR1	YBL038W	3	0.159737	-8.17415	0.251303	-6.11996	-10.2283
ACVR1	YCL049C	12	0.63895	-7.96857	0.232395	-6.11671	-9.82042
ACVR1	YER158C	9	0.479212	-8.53959	0.286876	-6.08978	-10.9894
ACVR1	YML042W	20	1.06492	-8.30196	0.267342	-6.08249	-10.5214
ACVR1	YER045C	2	0.106492	-7.19751	0.162151	-6.03042	-8.36459
ACVR1	YLR173W	2	0.106492	-8.14476	0.268992	-5.95388	-10.3356
ACVR1	YDR217C	2	0.106492	-7.96568	0.260628	-5.8896	-10.0418
ACVR1	YDR100W	3	0.159737	-7.63912	0.235411	-5.84079	-9.43745
ACVR1	YML087C	119	6.33625	-8.21123	0.297504	-5.76835	-10.6541
ACVR1	YDR144C	17	0.905179	-8.14157	0.301101	-5.69014	-10.593
ACVR1	YHR209W	3	0.159737	-7.0995	0.200994	-5.67255	-8.52646
ACVR1	YLR030W	14	0.745441	-8.42559	0.327769	-5.66395	-11.1872
ACVR1	YMR042W	4	0.212983	-8.13716	0.304273	-5.66124	-10.6131
ACVR1	YER167W	6	0.319475	-7.30608	0.225398	-5.6593	-8.95286
ACVR1	YMR225C	3	0.159737	-7.1228	0.213517	-5.60196	-8.64363
ACVR1	YDR329C	4	0.212983	-7.39739	0.247619	-5.56565	-9.22912
ACVR1	YPL136W	10	0.532458	-7.04347	0.210237	-5.56267	-8.52427
ACVR1	YBL022C	1	0.0532458	-7.18023	0.228484	-5.53966	-8.82079
ACVR1	YOR105W	2	0.106492	-7.07626	0.218142	-5.53264	-8.61989
ACVR1	YBR212W	14	0.745441	-7.53061	0.266154	-5.52631	-9.53491
ACVR1	YBR220C	20	1.06492	-7.70197	0.283236	-5.5205	-9.88345
ACVR1	YPL123C	1	0.0532458	-7.07527	0.221011	-5.51156	-8.63899
ACVR1	YBL013W	5	0.266229	-7.30437	0.25231	-5.46141	-9.14734
ACVR1	YLR024C	69	3.67396	-7.0801	0.229144	-5.45774	-8.70245
ACVR1	YMR141C	29	1.54413	-7.12903	0.237836	-5.43349	-8.82457
ACVR1	YBL091C	7	0.372721	-7.17046	0.242835	-5.42922	-8.9117
ACVR1	YOL068C	2	0.106492	-7.67596	0.296049	-5.4035	-9.94843
ACVR1	YHR049W	2	0.106492	-6.73571	0.199617	-5.39115	-8.08028
ACVR1	YOR163W	5	0.266229	-7.30802	0.265132	-5.37043	-9.24561
ACVR1	YER138C-A	2	0.106492	-7.46565	0.281664	-5.36284	-9.56846
ACVR1	YDR048C	5	0.266229	-7.22645	0.259632	-5.35023	-9.10266
ACVR1	YPL004C	4	0.212983	-6.88636	0.229539	-5.30567	-8.46705
ACVR1	YLR080W	1	0.0532458	-7.36919	0.28136	-5.2958	-9.44259
ACVR1	YDR306C	1	0.0532458	-6.93383	0.242974	-5.24909	-8.61857
ACVR1	YBR016W	13	0.692196	-7.89273	0.335691	-5.24321	-10.5422
ACVR1	YNL269W	15	0.798687	-6.87158	0.239422	-5.22637	-8.51679
ACVR1	YNL252C	2	0.106492	-7.43245	0.298792	-5.2117	-9.65321
ACVR1	YAL051W	2	0.106492	-6.64157	0.218635	-5.18949	-8.09365
ACVR1	YBL089W	12	0.63895	-8.18196	0.368791	-5.16453	-11.1994
ACVR1	YML036W	49	2.60904	-7.58955	0.320451	-5.15747	-10.0216
ACVR1	YNL242W	30	1.59737	-6.98722	0.266142	-5.12763	-8.84682
ACVR1	YOR067C	7	0.372721	-7.75515	0.345308	-5.07723	-10.4331
ACVR1	YNL065W	21	1.11816	-6.65716	0.240313	-5.05735	-8.25696
ACVR1	YOL050C	3	0.159737	-7.38074	0.317903	-5.03438	-9.7271
ACVR1	YHL038C	1	0.0532458	-7.0817	0.291135	-5.01997	-9.14344
ACVR1	YNL070W	7	0.372721	-7.26885	0.309653	-5.01803	-9.51967
ACVR1	YOR316C	28	1.49088	-6.27879	0.201892	-5.01115	-7.54643
ACVR1	YIL102C	2	0.106492	-6.2766	0.204282	-4.99441	-7.5588
ACVR1	YDL188C	30	1.59737	-6.86109	0.273992	-4.9812	-8.74097
ACVR1	YJR015W	115	6.12327	-5.97976	0.170784	-4.95851	-7.00101
ACVR1	YDL178W	42	2.23632	-7.37322	0.337032	-4.88821	-9.85823
ACVR1	YCL047C	2	0.106492	-6.74226	0.277195	-4.87334	-8.61118
ACVR1	YNL142W	1	0.0532458	-6.25313	0.220713	-4.87298	-7.63328
ACVR1	YCL033C	6	0.319475	-6.75695	0.280163	-4.8639	-8.65
ACVR1	YPL014W	6	0.319475	-6.93615	0.300402	-4.85252	-9.01978
ACVR1	YBL024W	36	1.91685	-6.76031	0.282728	-4.84898	-8.67163
ACVR1	YDR093W	8	0.425967	-6.4404	0.249301	-4.8348	-8.046
ACVR1	YOL019W	3	0.159737	-5.91187	0.187118	-4.80565	-7.01809
ACVR1	YPL147W	13	0.692196	-6.3298	0.242227	-4.79655	-7.86305
ACVR1	YHR143W	2	0.106492	-7.10124	0.324606	-4.79614	-9.40635
ACVR1	YAL012W	39	2.07659	-7.39387	0.35144	-4.79537	-9.99238
ACVR1	YDL114W	18	0.958425	-6.77369	0.292418	-4.79294	-8.75444
ACVR1	YDR321W	3	0.159737	-6.30101	0.240383	-4.78636	-7.81567
ACVR1	YOR320C	24	1.2779	-7.05702	0.32234	-4.78226	-9.33178
ACVR1	YJL094C	35	1.8636	-8.11347	0.411396	-4.77562	-11.4513
ACVR1	YPL240C	6	0.319475	-6.5024	0.266376	-4.77031	-8.23448
ACVR1	YNL145W	41	2.18308	-6.95024	0.316375	-4.75136	-9.14912
ACVR1	YDL177C	74	3.94019	-6.50373	0.270047	-4.74742	-8.26005
ACVR1	YER084W	1	0.0532458	-7.52605	0.369323	-4.74651	-10.3056
ACVR1	YDR111C	8	0.425967	-6.60924	0.287051	-4.71205	-8.50643
ACVR1	YCL022C	12	0.63895	-7.45206	0.370166	-4.69356	-10.2106
[truncated: 24,047 more rows]
