# Supplementary material for: Yeast genetic interaction screen of human genes associated with amyotrophic lateral sclerosis: identification of MAP2K5 kinase as a potential drug target
Source: Genome Res. 2017 Sep;27(9):1487–500. doi: 10.1101/gr.211649.116 (PMC5580709; doi:10.1101/gr.211649.116)
Supplement: Supplemental Material [file supp_gr.211649.116_Supplemental_Table_S2.xlsx]

## Sheet: Suppressors
Supplemental Table 2. List of toxicity modifiers for the 20 OMIM ORFs, based on Z-scores
Query (OMIM)	Subject (yeast gene deletion)	Barcode counts	Normalized barcode counts	Z-score	Error rate	Min Z-score
OPTN	YHR156C	44	2.10803	3.66875	0.223034	2.8505
OPTN	YPL064C	33	1.58102	3.64944	0.261509	2.69508
OPTN	YJR094C	108	5.17425	3.30756	0.187335	2.68794
OPTN	YDR136C	25	1.19774	3.71894	0.282118	2.66976
OPTN	YOR005C	165	7.9051	3.23082	0.187636	2.6246
OPTN	YER176W	42	2.01221	3.26308	0.226292	2.52467
OPTN	YBL048W	17	0.814465	3.72867	0.335927	2.47611
OPTN	YER072W	40	1.91639	3.25641	0.24068	2.47266
OPTN	YER053C	41	1.9643	3.29539	0.297262	2.3158
OPTN	YNL214W	135	6.46781	2.72671	0.185976	2.21961
OPTN	YPL248C	51	2.44339	3.00493	0.271872	2.18798
OPTN	YML062C	62	2.9704	2.9713	0.288308	2.11465
OPTN	YDR095C	113	5.41379	2.65374	0.213076	2.08829
OPTN	YOR189W	19	0.910284	3.18371	0.353968	2.05678
OPTN	YMR210W	143	6.85108	2.61789	0.217509	2.04848
OPTN	YOL008W	13	0.622826	3.54073	0.427704	2.02635
OPTN	YDR284C	16	0.766555	3.12433	0.359959	1.99969
OPTN	YDR093W	51	2.44339	2.66099	0.251712	1.99119
OPTN	YLR124W	76	3.64114	2.67743	0.263898	1.97086
OPTN	YMR132C	45	2.15594	2.77495	0.29072	1.96822
OPTN	YDL067C	21	1.0061	2.97271	0.354093	1.9201
OPTN	YML076C	49	2.34757	2.7647	0.310318	1.90676
OPTN	YLR206W	38	1.82057	2.76984	0.314299	1.89928
OPTN	YBR007C	74	3.54532	2.49703	0.249446	1.87416
OPTN	YER093C-A	97	4.64724	2.5094	0.253844	1.87241
OPTN	YHR073W	22	1.05401	2.82634	0.340577	1.86376
OPTN	YDL112W	45	2.15594	2.70451	0.312052	1.86056
OPTN	YIL165C	64	3.06622	2.68861	0.314833	1.84215
OPTN	YLR111W	67	3.20995	2.59841	0.295666	1.83015
OPTN	YPL034W	77	3.68905	2.42698	0.246337	1.82912
OPTN	YNL104C	78	3.73696	2.61786	0.301362	1.82894
OPTN	YIR016W	407	19.4992	2.32644	0.216319	1.82319
OPTN	YBR244W	186	8.9112	2.40389	0.248413	1.80673
OPTN	YBR207W	53	2.53921	2.44036	0.261096	1.80319
OPTN	YJL017W	44	2.10803	2.37863	0.249107	1.78609
OPTN	YOR231W	59	2.82667	2.39103	0.259683	1.77012
OPTN	YPL225W	60	2.87458	2.39241	0.260192	1.76992
OPTN	YER165C-A	30	1.43729	2.67136	0.338222	1.76785
OPTN	YOR052C	72	3.4495	2.35072	0.24904	1.76529
OPTN	YIL134W	12	0.574916	3.02871	0.420128	1.75627
OPTN	YBR053C	26	1.24565	2.57904	0.319201	1.7558
OPTN	YPL223C	55	2.63503	2.35945	0.272625	1.7162
OPTN	YBR023C	21	1.0061	2.62248	0.354837	1.69193
OPTN	YDL131W	30	1.43729	2.62363	0.359374	1.68077
OPTN	YMR130W	48	2.29966	2.34783	0.285418	1.67772
OPTN	YJR024C	59	2.82667	2.40527	0.302932	1.67664
OPTN	YJL105W	32	1.53311	2.38481	0.300351	1.66853
OPTN	YER024W	44	2.10803	2.42215	0.314188	1.66114
OPTN	YHR161C	40	1.91639	2.30208	0.287388	1.64049
OPTN	YDL179W	132	6.32408	2.17399	0.252823	1.62435
OPTN	YNL212W	42	2.01221	2.38968	0.320295	1.62428
OPTN	YER028C	67	3.20995	2.23117	0.27862	1.60952
OPTN	YJL164C	28	1.34147	2.50886	0.36013	1.60534
OPTN	YOR079C	41	1.9643	2.37354	0.330855	1.58824
OPTN	YJR103W	43	2.06012	2.35967	0.327102	1.58781
OPTN	YDR063W	106	5.07843	2.15849	0.266775	1.58265
OPTN	YHR006W	106	5.07843	2.2032	0.292666	1.5584
OPTN	YDL061C	15	0.718645	2.59477	0.405204	1.54336
OPTN	YJR075W	64	3.06622	2.17415	0.291763	1.53981
OPTN	YPL202C	24	1.14983	2.3107	0.335646	1.53513
OPTN	YPL226W	1123	53.8026	1.74456	0.124117	1.52803
OPTN	YIL132C	103	4.9347	2.18248	0.301505	1.52446
OPTN	YIL124W	72	3.4495	2.20332	0.309174	1.52211
OPTN	YEL038W	54	2.58712	2.14908	0.292813	1.5198
OPTN	YBL017C	13	0.622826	2.73106	0.445838	1.51345
OPTN	YDR146C	50	2.39548	2.25788	0.330231	1.51226
OPTN	YJL112W	121	5.79707	1.98425	0.237874	1.51225
OPTN	YDL133W	77	3.68905	2.10442	0.284557	1.50559
OPTN	YMR216C	17	0.814465	2.77437	0.461326	1.49448
OPTN	YMR316C-B	41	1.9643	2.25869	0.341216	1.48799
OPTN	YEL065W	81	3.88068	2.12734	0.30122	1.48655
OPTN	YBR047W	63	3.01831	2.09354	0.294215	1.47759
OPTN	YJL132W	319	15.2832	1.99848	0.262594	1.47369
OPTN	YDR244W	36	1.72475	2.23782	0.344256	1.46744
OPTN	YER155C	16	0.766555	2.63824	0.444621	1.46522
OPTN	YML002W	32	1.53311	2.18789	0.335337	1.45421	1
OPTN	YML003W	38	1.82057	2.1493	0.326999	1.44648
OPTN	YER065C	17	0.814465	2.38707	0.394037	1.44647
OPTN	YOL013C	48	2.29966	2.10508	0.315667	1.44058
OPTN	YJR129C	99	4.74306	1.97753	0.277078	1.4296
OPTN	YIL077C	40	1.91639	2.1602	0.338912	1.42808
OPTN	YOR363C	12	0.574916	2.62688	0.459249	1.42049
OPTN	YIL044C	15	0.718645	2.42658	0.417204	1.4142
OPTN	YAR028W	45	2.15594	2.19904	0.359474	1.40854
OPTN	YMR193W	13	0.622826	2.55726	0.450924	1.40413
OPTN	YLR131C	196	9.3903	1.8285	0.237893	1.39352
OPTN	YJR091C	117	5.60543	1.89183	0.266235	1.38816
OPTN	YML074C	51	2.44339	1.89313	0.270062	1.38187
OPTN	YBR128C	38	1.82057	2.03649	0.324545	1.37556
OPTN	YDR314C	22	1.05401	2.27495	0.397801	1.36997
OPTN	YIL087C	141	6.75526	1.82577	0.249914	1.36948
OPTN	YDR304C	31	1.4852	2.22495	0.386295	1.36546
OPTN	YOR288C	93	4.4556	1.98186	0.314781	1.35801
OPTN	YJL007C	60	2.87458	1.97078	0.315347	1.3493
OPTN	YLR207W	31	1.4852	2.10887	0.363847	1.34157
OPTN	YBL060W	181	8.67165	1.76778	0.248983	1.32763
OPTN	YOR024W	44	2.10803	2.00351	0.345625	1.31105
OPTN	YPL009C	36	1.72475	1.98488	0.348215	1.29372
OPTN	YOL001W	16	0.766555	2.4718	0.480927	1.28304
OPTN	YPL171C	38	1.82057	2.02662	0.369012	1.27877
OPTN	YNL190W	36	1.72475	1.92526	0.338762	1.27306
OPTN	YDR248C	32	1.53311	2.19239	0.422472	1.26617
OPTN	YBL062W	37	1.77266	2.03554	0.378976	1.26412
OPTN	YMR284W	49	2.34757	2.09873	0.397878	1.26369
OPTN	YLR108C	16	0.766555	2.19898	0.431006	1.25121
OPTN	YJL037W	131	6.27617	1.78869	0.302414	1.24777
OPTN	YDR191W	56	2.68294	1.86534	0.334479	1.24142
OPTN	YPL270W	17	0.814465	2.13666	0.420111	1.23902
OPTN	YLR032W	24	1.14983	2.06529	0.401005	1.2371
OPTN	YBL054W	22	1.05401	2.24123	0.453063	1.22581
OPTN	YNL275W	52	2.4913	1.94262	0.371051	1.22181
OPTN	YEL068C	55	2.63503	1.90592	0.36331	1.21348
OPTN	YBL071C	15	0.718645	2.27106	0.470962	1.20148
OPTN	YPL130W	30	1.43729	2.07011	0.423267	1.1939
OPTN	YBR217W	111	5.31797	1.75656	0.320386	1.19378
OPTN	YML104C	55	2.63503	1.76825	0.324962	1.19363
OPTN	YLR220W	32	1.53311	1.90842	0.382752	1.17797
OPTN	YBL086C	107	5.12634	1.71898	0.319705	1.16942
OPTN	YNL068C	38	1.82057	1.95176	0.404974	1.16135
OPTN	YNL307C	20	0.958194	2.10374	0.450095	1.15686
OPTN	YOR067C	29	1.38938	2.07355	0.447272	1.14611
OPTN	YCL076W	49	2.34757	1.82877	0.38052	1.13289
OPTN	YOR234C	9	0.431187	2.472	0.541855	1.13254
OPTN	YEL039C	41	1.9643	1.89756	0.405829	1.12748
OPTN	YMR034C	69	3.30577	1.75744	0.360746	1.12345
OPTN	YHR015W	30	1.43729	2.03927	0.44968	1.12225
OPTN	YHR138C	37	1.77266	1.82676	0.385772	1.12205
OPTN	YLR144C	22	1.05401	1.98264	0.434157	1.12186
OPTN	YJL153C	31	1.4852	1.8503	0.39602	1.11754
OPTN	YAL062W	62	2.9704	1.7089	0.346051	1.11753
OPTN	YDR105C	9	0.431187	2.40517	0.537685	1.11195
OPTN	YOR101W	18	0.862374	2.16437	0.48711	1.11008
OPTN	YHL034C	21	1.0061	1.91681	0.421574	1.10873
OPTN	YBL095W	461	22.0864	1.41266	0.21716	1.10589
OPTN	YPL167C	86	4.12023	1.70581	0.352275	1.10489
OPTN	YJR100C	49	2.34757	1.82284	0.396495	1.10009
OPTN	YIL126W	13	0.622826	2.11452	0.481359	1.09668
OPTN	YML131W	27	1.29356	1.88554	0.419923	1.09376
OPTN	YJR097W	229	10.9713	1.47507	0.258702	1.09346
OPTN	YMR158W	16	0.766555	1.90671	0.428144	1.09036
OPTN	YJR043C	26	1.24565	1.81884	0.400925	1.08962
OPTN	YML006C	36	1.72475	1.90408	0.428739	1.08773	1
OPTN	YPL260W	18	0.862374	1.99528	0.460363	1.07673
OPTN	YDL068W	9	0.431187	2.3165	0.535335	1.0764
OPTN	YMR304W	12	0.574916	2.17154	0.508981	1.06627
OPTN	YIR003W	560	26.8294	1.28231	0.168499	1.06624
OPTN	YHL002W	156	7.47391	1.59138	0.330182	1.06593
OPTN	YOL032W	41	1.9643	1.73002	0.384807	1.06429
OPTN	YHR146W	28	1.34147	1.70334	0.37545	1.06382
OPTN	YJR107W	168	8.04883	1.40676	0.251207	1.05337
OPTN	YBL104C	40	1.91639	1.79904	0.415713	1.05116
OPTN	YOR044W	17	0.814465	2.02801	0.483669	1.04712
OPTN	YAL004W	47	2.25175	1.82525	0.427174	1.04555
OPTN	YER128W	52	2.4913	1.58559	0.341092	1.04476
OPTN	YLR138W	17	0.814465	1.98105	0.480091	1.02997
OPTN	YDR128W	82	3.92859	1.49554	0.311562	1.02958
OPTN	YEL057C	69	3.30577	1.65777	0.379354	1.02889
OPTN	YHR206W	13	0.622826	2.12461	0.515806	1.02873
OPTN	YMR262W	56	2.68294	1.61693	0.36393	1.02848
OPTN	YJL064W	88	4.21605	1.55234	0.34224	1.02107
OPTN	YOR107W	53	2.53921	1.72386	0.410441	1.01632
OPTN	YOR013W	46	2.20385	1.6984	0.403699	1.01276
OPTN	YHL014C	170	8.14465	1.43882	0.298962	1.00867
OPTN	YPL111W	17	0.814465	1.93023	0.477593	1.00836
OPTN	YBR010W	35	1.67684	1.69514	0.405983	1.00694
OPTN	YMR179W	9	0.431187	2.35549	0.573959	1.00354
OPTN	YML004C	76	3.64114	1.56821	0.36263	0.999527
OPTN	YCL036W	29	1.38938	1.73358	0.425777	0.99546
OPTN	YDR249C	29	1.38938	1.82098	0.453767	0.994683
OPTN	YOL083W	23	1.10192	1.89214	0.47658	0.990383
OPTN	YJL216C	67	3.20995	1.49003	0.336334	0.988883
OPTN	YPL087W	30	1.43729	1.62266	0.394648	0.982278
OPTN	YPL177C	44	2.10803	1.69322	0.423085	0.976841
OPTN	YIL164C	101	4.83888	1.56001	0.374895	0.975168
OPTN	YBR249C	28	1.34147	1.73646	0.441437	0.969922
OPTN	YBR226C	59	2.82667	1.51588	0.360534	0.969356
OPTN	YIL135C	117	5.60543	1.39584	0.30874	0.964886
OPTN	YPL201C	42	2.01221	1.55458	0.379735	0.964248
OPTN	YIL028W	16	0.766555	1.91655	0.498766	0.960639
OPTN	YBR204C	29	1.38938	1.61732	0.408566	0.956539
OPTN	YNL278W	11	0.527006	2.01061	0.529463	0.946065
OPTN	YDR273W	21	1.0061	1.77145	0.476174	0.927931
OPTN	YJL057C	61	2.92249	1.60772	0.425937	0.922931
OPTN	YML097C	19	0.910284	1.7615	0.476974	0.921309
OPTN	YDR054C	48	2.29966	1.68133	0.45389	0.91819
OPTN	YJR056C	55	2.63503	1.46398	0.373886	0.916616
OPTN	YNL160W	21	1.0061	1.70708	0.465955	0.91166
OPTN	YER041W	20	0.958194	1.678	0.458357	0.908874
OPTN	YBR054W	36	1.72475	1.65381	0.453348	0.904061
OPTN	YNL076W	41	1.9643	1.4725	0.395127	0.890673
OPTN	YIL173W	107	5.12634	1.30497	0.317785	0.890267
OPTN	YPL127C	21	1.0061	1.70828	0.479305	0.889492
OPTN	YER184C	37	1.77266	1.76921	0.498234	0.88773
OPTN	YJR144W	13	0.622826	1.99113	0.554372	0.887303
OPTN	YLL049W	16	0.766555	1.66187	0.466215	0.88708
OPTN	YBL102W	51	2.44339	1.55291	0.42879	0.887036
OPTN	YOR022C	45	2.15594	1.63565	0.462287	0.879512
OPTN	YBR098W	16	0.766555	2.00499	0.562013	0.878158
OPTN	YMR035W	24	1.14983	1.75166	0.49923	0.877177
OPTN	YEL004W	68	3.25786	1.58916	0.449932	0.874143
OPTN	YLR224W	633	30.3268	1.29096	0.325634	0.870579
OPTN	YHR135C	15	0.718645	2.17554	0.602228	0.865369
OPTN	YER096W	87	4.16814	1.56776	0.450859	0.860923
OPTN	YNL291C	18	0.862374	1.74866	0.509708	0.857353
OPTN	YLR083C	27	1.29356	1.74623	0.511787	0.85253
OPTN	YDR100W	22	1.05401	1.66571	0.489583	0.850206
OPTN	YBL067C	53	2.53921	1.51233	0.439551	0.847586
OPTN	YPL220W	19	0.910284	1.56845	0.463595	0.841323
OPTN	YCR023C	36	1.72475	1.50729	0.442584	0.840188
OPTN	YOL052C	22	1.05401	1.70141	0.507243	0.838379
OPTN	YDR294C	17	0.814465	1.96461	0.573884	0.837153
OPTN	YOL030W	39	1.86848	1.55319	0.461442	0.836482
OPTN	YOR344C	240	11.4983	1.26121	0.338375	0.834447
OPTN	YBL055C	17	0.814465	1.80467	0.53887	0.832189
OPTN	YBR266C	7	0.335368	2.12941	0.609193	0.832187
OPTN	YPL247C	17	0.814465	1.52302	0.454159	0.831327
OPTN	YMR148W	72	3.4495	1.35645	0.388831	0.829022
OPTN	YHL037C	10	0.479097	1.95859	0.57843	0.825685
OPTN	YMR143W	10	0.479097	2.10005	0.610062	0.818889
OPTN	YBR170C	32	1.53311	1.53995	0.468673	0.818218
OPTN	YDR094W	62	2.9704	1.29534	0.368615	0.817859
OPTN	YLL005C	43	2.06012	1.46048	0.443129	0.813297
OPTN	YDR075W	15	0.718645	1.66477	0.512137	0.812178
OPTN	YPL041C	23	1.10192	1.50981	0.463892	0.809419
OPTN	YNL070W	29	1.38938	1.57074	0.487535	0.804949
OPTN	YJL215C	41	1.9643	1.39622	0.430255	0.79549
OPTN	YDL093W	18	0.862374	1.67561	0.525467	0.79513
OPTN	YIL032C	22	1.05401	1.50761	0.472643	0.795051
OPTN	YHR001W-A	63	3.01831	1.5035	0.473316	0.791872
OPTN	YPL200W	42	2.01221	1.54747	0.489117	0.790574
OPTN	YIL156W	67	3.20995	1.55483	0.491643	0.790407
OPTN	YJR116W	127	6.08453	1.28303	0.384923	0.78916
OPTN	YBR231C	30	1.43729	1.73325	0.544944	0.788726
OPTN	YLR189C	22	1.05401	1.57612	0.506851	0.777261
OPTN	YBR050C	57	2.73085	1.48244	0.476702	0.775759
OPTN	YIL054W	49	2.34757	1.33677	0.419982	0.77535
OPTN	YMR104C	50	2.39548	1.52227	0.490772	0.775184
OPTN	YMR129W	40	1.91639	1.43953	0.46455	0.770797
OPTN	YIL137C	45	2.15594	1.46964	0.476109	0.769929
OPTN	YJL012C	47	2.25175	1.3126	0.417573	0.764494
OPTN	YLR085C	19	0.910284	1.53411	0.50234	0.763468
OPTN	YJL208C	29	1.38938	1.49764	0.490314	0.763327
OPTN	YDL011C	18	0.862374	1.6203	0.528978	0.763198
OPTN	YNL303W	27	1.29356	1.49221	0.49433	0.754567
OPTN	YNL176C	33	1.58102	1.47042	0.486938	0.754418
OPTN	YDR210W	33	1.58102	1.36851	0.449054	0.753974
OPTN	YOR163W	26	1.24565	1.48448	0.493015	0.752608
OPTN	YJL073W	224	10.7318	1.08699	0.309644	0.750411
OPTN	YHR033W	42	2.01221	1.63764	0.542296	0.749556
OPTN	YHR093W	22	1.05401	1.6227	0.540369	0.745845
OPTN	YDR014W	26	1.24565	1.62815	0.547083	0.737418
OPTN	YDR111C	33	1.58102	1.37839	0.466145	0.73586
OPTN	YOR339C	46	2.20385	1.28107	0.425917	0.735439
OPTN	YPL267W	17	0.814465	1.6261	0.548635	0.733963
OPTN	YMR157C	41	1.9643	1.38354	0.471116	0.731733
OPTN	YNL057W	56	2.68294	1.50788	0.51943	0.724644
OPTN	YML101C	90	4.31187	1.32688	0.460182	0.716275
OPTN	YLR031W	46	2.20385	1.29526	0.448122	0.714825
OPTN	YML081W	36	1.72475	1.43643	0.503877	0.712648
OPTN	YIL140W	48	2.29966	1.29975	0.455112	0.708216
OPTN	YLR058C	61	2.92249	1.23541	0.429728	0.704521
OPTN	YMR304C-A	80	3.83277	1.23182	0.430507	0.701512
OPTN	YBR229C	76	3.64114	1.13832	0.3855	0.699496
OPTN	YJL089W	55	2.63503	1.39702	0.500336	0.698041
OPTN	YOR115C	226	10.8276	1.15919	0.404964	0.689757
OPTN	YMR232W	43	2.06012	1.27951	0.461091	0.689538
OPTN	YPL072W	22	1.05401	1.45098	0.526153	0.687545
OPTN	YBR033W	57	2.73085	1.31186	0.476737	0.686446
OPTN	YOL065C	49	2.34757	1.57976	0.567882	0.682643
OPTN	YER038W-A	46	2.20385	1.19026	0.426814	0.682241
OPTN	YML100W	26	1.24565	1.22251	0.44257	0.681466
OPTN	YBR066C	38	1.82057	1.33722	0.499046	0.669887
OPTN	YJL171C	52	2.4913	1.34218	0.503093	0.66694
OPTN	YLL060C	63	3.01831	1.12394	0.40736	0.66609
OPTN	YOR306C	65	3.11413	1.41717	0.532129	0.663053
OPTN	YDL012C	72	3.4495	1.13768	0.418626	0.661418
OPTN	YAL002W	12	0.574916	1.62311	0.59772	0.652946
OPTN	YDR139C	51	2.44339	1.28203	0.493195	0.649741
OPTN	YDR295C	11	0.527006	1.59533	0.594376	0.647103
OPTN	YLR070C	40	1.91639	1.51351	0.572838	0.646512
OPTN	YPL273W	14	0.670736	1.40743	0.542874	0.643372
OPTN	YMR141C	80	3.83277	1.11855	0.425683	0.6424
OPTN	YMR181C	24	1.14983	1.64171	0.609553	0.640999
OPTN	YBL070C	29	1.38938	1.33912	0.521604	0.640628
OPTN	YDL001W	19	0.910284	1.23923	0.483642	0.639886
OPTN	YER183C	13	0.622826	1.541	0.587013	0.636412
OPTN	YAL042W	24	1.14983	1.36008	0.532881	0.635317
OPTN	YMR003W	36	1.72475	1.3595	0.535149	0.631965
OPTN	YNL333W	26	1.24565	1.30186	0.514766	0.631707
OPTN	YDR219C	11	0.527006	1.626	0.612198	0.630567
OPTN	YIL113W	12	0.574916	1.62122	0.611077	0.630531
OPTN	YMR154C	150	7.18645	0.964293	0.351814	0.625042
OPTN	YAL061W	103	4.9347	1.16074	0.463175	0.623116
OPTN	YDR019C	88	4.21605	1.2734	0.516348	0.61588
OPTN	YLL045C	20	0.958194	1.61938	0.621496	0.612942
OPTN	YJL110C	93	4.4556	1.11803	0.460261	0.603445
OPTN	YER011W	22	1.05401	1.39249	0.567784	0.601858
OPTN	YJL048C	73	3.49741	1.28957	0.534176	0.600714
OPTN	YCL033C	27	1.29356	1.26765	0.526449	0.600298
OPTN	YPL071C	12	0.574916	1.38725	0.567974	0.599329
OPTN	YDL224C	88	4.21605	1.04693	0.42897	0.597828
OPTN	YPL246C	32	1.53311	1.40055	0.573659	0.597113
OPTN	YIL163C	45	2.15594	1.26495	0.534073	0.589376
OPTN	YPL187W	44	2.10803	1.29975	0.546934	0.588872
OPTN	YML123C	48	2.29966	1.16345	0.495178	0.587337
OPTN	YJL044C	60	2.87458	1.07784	0.465327	0.576293
OPTN	YJR020W	76	3.64114	1.15557	0.508037	0.568498
OPTN	YLL044W	38	1.82057	1.28749	0.559425	0.567237
OPTN	YOR267C	15	0.718645	1.43937	0.606438	0.566479
OPTN	YDR101C	61	2.92249	1.04971	0.461061	0.565727
OPTN	YBR175W	22	1.05401	1.32634	0.574248	0.564693
OPTN	YJL130C	28	1.34147	1.23271	0.543894	0.562244
OPTN	YEL067C	89	4.26396	0.907186	0.381278	0.561296
OPTN	YJR095W	43	2.06012	1.15393	0.51928	0.554715
OPTN	YJR035W	34	1.62893	1.20202	0.541369	0.551282
OPTN	YNL183C	781	37.4175	0.727571	0.242667	0.551014
OPTN	YJL020C	30	1.43729	1.18338	0.535558	0.54961
OPTN	YDR269C	34	1.62893	1.30266	0.580283	0.546748
OPTN	YNL259C	32	1.53311	1.20332	0.548541	0.543251
OPTN	YOR090C	68	3.25786	1.02747	0.471686	0.542825
OPTN	YDR309C	17	0.814465	1.41874	0.617405	0.542801
OPTN	YLR205C	28	1.34147	1.20279	0.548894	0.542588	1
OPTN	YMR292W	32	1.53311	1.33347	0.598078	0.535951
OPTN	YCL039W	103	4.9347	1.03159	0.480936	0.535463
OPTN	YMR247C	51	2.44339	1.10996	0.518584	0.534354
OPTN	YBR024W	64	3.06622	1.26213	0.576692	0.534269
OPTN	YNL091W	30	1.43729	1.18929	0.550862	0.534155
OPTN	YCR001W	9	0.431187	1.62254	0.675206	0.526992
OPTN	YML038C	65	3.11413	1.07715	0.511091	0.526627
OPTN	YLR073C	56	2.68294	1.23043	0.573694	0.52454
OPTN	YPL203W	89	4.26396	1.35021	0.611979	0.523912
OPTN	YBL069W	47	2.25175	1.19406	0.56163	0.523442
OPTN	YHL027W	51	2.44339	1.0932	0.522339	0.52218
OPTN	YBR084W	45	2.15594	1.06634	0.514881	0.517301
OPTN	YPL047W	21	1.0061	1.23222	0.58122	0.51603
OPTN	YER066C-A	15	0.718645	1.27223	0.597026	0.512675
OPTN	YDL121C	70	3.35368	1.05902	0.516247	0.512305
OPTN	YLR037C	28	1.34147	1.20301	0.575613	0.510543	0
OPTN	YLR015W	27	1.29356	1.07078	0.525785	0.507782
OPTN	YDL199C	67	3.20995	0.984091	0.485519	0.506296
OPTN	YJR011C	20	0.958194	1.24356	0.593493	0.505515
OPTN	YML060W	31	1.4852	1.1318	0.554305	0.504438
OPTN	YPL030W	41	1.9643	0.965884	0.479065	0.503163
OPTN	YOR053W	50	2.39548	1.13206	0.556849	0.501673
OPTN	YER004W	22	1.05401	1.17091	0.575326	0.497257
OPTN	YMR252C	117	5.60543	0.919859	0.460921	0.495876
OPTN	YLR176C	20	0.958194	1.24731	0.602732	0.495517
OPTN	YPL051W	23	1.10192	1.25872	0.60781	0.493656
OPTN	YPL240C	27	1.29356	1.11504	0.557357	0.493565
OPTN	YOR300W	211	10.1089	0.88962	0.451902	0.487599
OPTN	YMR241W	37	1.77266	1.17122	0.583753	0.487518
OPTN	YDR321W	20	0.958194	1.13038	0.571109	0.48481
OPTN	YIL084C	13	0.622826	1.27202	0.619942	0.48344
OPTN	YBR235W	64	3.06622	1.20543	0.599359	0.482947
OPTN	YOR368W	32	1.53311	1.11749	0.568042	0.482708
OPTN	YOR188W	61	2.92249	1.14538	0.580363	0.480643
OPTN	YLR183C	13	0.622826	1.3572	0.649279	0.475997
OPTN	YOR094W	144	6.89899	1.0018	0.525569	0.475285
OPTN	YPL222W	28	1.34147	1.02772	0.540074	0.472675
OPTN	YLR019W	1292	61.8993	0.688364	0.314194	0.472084
OPTN	YDR291W	20	0.958194	1.1164	0.578184	0.470913
OPTN	YDL091C	18	0.862374	1.19696	0.610443	0.466284
OPTN	YNL295W	39	1.86848	0.965238	0.520908	0.462437
OPTN	YJL093C	42	2.01221	1.18379	0.610027	0.461646
OPTN	YDR329C	22	1.05401	1.16489	0.604149	0.461122
OPTN	YDR073W	41	1.9643	1.06108	0.56693	0.459522
OPTN	YNL173C	22	1.05401	1.34654	0.658953	0.459233
OPTN	YMR229C	7	0.335368	1.82138	0.748273	0.45849
OPTN	YER187W	9	0.431187	1.40899	0.67552	0.457187
OPTN	YOL058W	34	1.62893	1.06087	0.572211	0.453829
OPTN	YHR048W	8	0.383277	1.42473	0.684039	0.45016
OPTN	YNL117W	33	1.58102	1.11842	0.603154	0.443839
OPTN	YNL319W	20	0.958194	1.34545	0.670435	0.443412
OPTN	YLR025W	30	1.43729	1.093	0.594838	0.442844
OPTN	YOR351C	18	0.862374	1.23672	0.642622	0.441977
OPTN	YDR266C	5	0.239548	2.09695	0.789288	0.441854
OPTN	YMR140W	63	3.01831	0.929655	0.525297	0.44131
OPTN	YMR119W-A	40	1.91639	1.01632	0.566654	0.440419
OPTN	YOR382W	40	1.91639	1.02676	0.57238	0.439064
OPTN	YER171W	32	1.53311	0.994707	0.562924	0.434762
OPTN	YLR004C	40	1.91639	1.04271	0.583653	0.434129
OPTN	YPL184C	39	1.86848	0.946469	0.543756	0.431821
OPTN	YJR049C	47	2.25175	0.945266	0.544143	0.430906
OPTN	YIR001C	111	5.31797	1.13271	0.619936	0.430503
OPTN	YLL059C	31	1.4852	1.1198	0.619148	0.42648
OPTN	YER167W	29	1.38938	1.02115	0.583933	0.424868
OPTN	YAL058W	24	1.14983	1.11526	0.61924	0.424646
OPTN	YEL042W	31	1.4852	1.07604	0.605684	0.424301
OPTN	YOL053W	34	1.62893	1.06485	0.604999	0.420619
OPTN	YBR224W	72	3.4495	0.719092	0.416269	0.419756
OPTN	YNL143C	79	3.78486	0.843177	0.503144	0.418938
OPTN	YEL040W	42	2.01221	1.08282	0.614258	0.417688
OPTN	YLR227C	14	0.670736	1.21367	0.657688	0.415454
OPTN	YMR259C	66	3.16204	0.91857	0.5492	0.414092
OPTN	YPL179W	79	3.78486	0.939857	0.563393	0.410348
OPTN	YBL085W	27	1.29356	0.930696	0.563324	0.406413
OPTN	YJL158C	32	1.53311	0.935178	0.570121	0.402013
OPTN	YLL047W	145	6.9469	0.64694	0.379157	0.401648
OPTN	YJL053W	25	1.19774	1.02169	0.609947	0.398513
OPTN	YJL214W	18	0.862374	1.14799	0.6531	0.398238
OPTN	YNL195C	38	1.82057	1.02817	0.61269	0.39822
OPTN	YNL242W	73	3.49741	0.890471	0.552886	0.398142
OPTN	YDR253C	17	0.814465	0.98596	0.597819	0.396535
OPTN	YJL122W	64	3.06622	0.849356	0.535616	0.394427
OPTN	YHR159W	23	1.10192	1.18103	0.667916	0.392201
OPTN	YER087C-A	39	1.86848	0.835845	0.534748	0.388878
OPTN	YJL146W	25	1.19774	1.12551	0.65657	0.386535
OPTN	YDL162C	40	1.91639	0.995555	0.611757	0.386518
OPTN	YDR251W	20	0.958194	1.06472	0.642641	0.380486
OPTN	YEL052W	33	1.58102	1.20423	0.684686	0.379712
OPTN	YBR014C	27	1.29356	1.22642	0.690844	0.379155
OPTN	YHL029C	22	1.05401	1.15314	0.671383	0.378942
OPTN	YIL011W	28	1.34147	0.948763	0.603413	0.376267
OPTN	YPL022W	18	0.862374	0.873594	0.570087	0.37557
OPTN	YER085C	24	1.14983	1.01133	0.631646	0.372528
OPTN	YER064C	44	2.10803	1.01409	0.634698	0.370447
OPTN	YJR105W	5	0.239548	2.20053	0.832955	0.367589
OPTN	YBL101C	29	1.38938	0.998022	0.634101	0.365175
OPTN	YJR148W	59	2.82667	0.882924	0.586424	0.365156
OPTN	YIL119C	23	1.10192	1.09467	0.670893	0.360265
OPTN	YNL304W	39	1.86848	0.917685	0.60954	0.358319
OPTN	YLR084C	20	0.958194	1.09355	0.672471	0.35817
OPTN	YIL115C	12	0.574916	1.19928	0.705922	0.352683
OPTN	YEL037C	15	0.718645	0.96835	0.640793	0.347838
OPTN	YDL171C	127	6.08453	0.88525	0.609299	0.345868
OPTN	YJR030C	28	1.34147	1.10456	0.688702	0.343848
OPTN	YPL002C	10	0.479097	1.3258	0.741275	0.343017
OPTN	YOR340C	21	1.0061	0.811561	0.583911	0.337682
OPTN	YOR246C	23	1.10192	1.16311	0.711663	0.335368
OPTN	YOR271C	31	1.4852	1.06385	0.689371	0.330464
OPTN	YML119W	55	2.63503	1.00185	0.670741	0.32987
OPTN	YBL078C	30	1.43729	1.0635	0.692014	0.327542
OPTN	YPL164C	30	1.43729	0.847998	0.61394	0.327378
OPTN	YAL027W	31	1.4852	0.969574	0.663861	0.325911
OPTN	YIL122W	9	0.431187	1.38473	0.76474	0.325772
OPTN	YNL085W	49	2.34757	1.05066	0.690077	0.325622
OPTN	YOR038C	18	0.862374	1.22302	0.736071	0.32279
OPTN	YDR217C	14	0.670736	1.20635	0.733738	0.321205
OPTN	YIL161W	74	3.54532	0.938792	0.657945	0.321118
OPTN	YBR062C	22	1.05401	0.964821	0.670216	0.318183
OPTN	YJR108W	74	3.54532	0.798292	0.602759	0.317115
OPTN	YJR120W	22	1.05401	1.08768	0.711716	0.31356
OPTN	YBL088C	19	0.910284	1.00245	0.689284	0.311476
OPTN	YNL300W	15	0.718645	1.09276	0.715937	0.310413
OPTN	YHR158C	23	1.10192	1.00815	0.692575	0.309931
OPTN	YIL154C	11	0.527006	1.10988	0.722991	0.307447
OPTN	YCL069W	28	1.34147	1.06876	0.713669	0.306018
OPTN	YIL112W	17	0.814465	1.06104	0.7132	0.304307
OPTN	YOL045W	29	1.38938	0.791716	0.615731	0.304232
OPTN	YOR166C	49	2.34757	1.03325	0.705788	0.303994
OPTN	YER074W	17	0.814465	0.879635	0.654727	0.303714
OPTN	YEL020C	36	1.72475	0.816337	0.629838	0.302177
OPTN	YLR110C	61	2.92249	0.857388	0.64923	0.300746
OPTN	YMR114C	80	3.83277	0.964763	0.691208	0.297911
OPTN	YDL129W	103	4.9347	0.966813	0.697438	0.292521
OPTN	YOL057W	40	1.91639	0.797017	0.63562	0.290417
OPTN	YOR298W	113	5.41379	0.765864	0.621312	0.290023
OPTN	YLR192C	266	12.744	0.840935	0.658691	0.287019
OPTN	YJL065C	29	1.38938	0.971624	0.70653	0.285142	1
OPTN	YPL052W	22	1.05401	0.841826	0.662195	0.284374
OPTN	YEL009C	16	0.766555	1.06704	0.73551	0.282222
OPTN	YBR263W	17	0.814465	0.863807	0.673684	0.281874
OPTN	YJL042W	814	38.9985	0.606855	0.537302	0.280791
OPTN	YPL250C	21	1.0061	1.10701	0.748498	0.278416
OPTN	YML016C	13	0.622826	1.1516	0.758341	0.278294
OPTN	YMR102C	38	1.82057	0.76203	0.638751	0.275283
OPTN	YLR053C	13	0.622826	1.00271	0.730794	0.269935
OPTN	YDR070C	15	0.718645	1.08235	0.751658	0.268792
OPTN	YLL012W	54	2.58712	0.930702	0.71251	0.267568
OPTN	YML022W	23	1.10192	0.858955	0.690512	0.265836
OPTN	YPL065W	13	0.622826	0.990595	0.731791	0.265686
OPTN	YJR087W	57	2.73085	0.719471	0.634256	0.263143
OPTN	YER141W	15	0.718645	1.09602	0.760485	0.262512
OPTN	YJR077C	11	0.527006	1.29759	0.799234	0.260512
OPTN	YNL201C	43	2.06012	0.633042	0.588644	0.260405
OPTN	YPL154C	35	1.67684	0.947679	0.727441	0.258299
OPTN	YPL032C	44	2.10803	0.868991	0.703471	0.257681
OPTN	YPL054W	72	3.4495	0.810452	0.683667	0.256373
OPTN	YML095C	38	1.82057	0.699211	0.634519	0.255548
OPTN	YOR268C	30	1.43729	0.897064	0.715662	0.255069
OPTN	YLR043C	47	2.25175	0.819254	0.693037	0.25148
OPTN	YMR096W	100	4.79097	0.656948	0.617376	0.251364
OPTN	YMR174c	31	1.4852	0.869479	0.713258	0.249316
OPTN	YPL108W	12	0.574916	1.05917	0.764825	0.249091
OPTN	YJL099W	43	2.06012	0.759731	0.679901	0.243189
OPTN	YBR185C	22	1.05401	0.872685	0.723909	0.240941
OPTN	YDR067C	18	0.862374	1.16977	0.802281	0.231286
OPTN	YHR171W	23	1.10192	0.915886	0.74949	0.229438
OPTN	YLR003C	96	4.59933	0.66198	0.653568	0.229331
OPTN	YIL155C	25	1.19774	0.759656	0.69813	0.229317
OPTN	YJL211C	24	1.14983	0.812636	0.719679	0.227799
OPTN	YHR035W	136	6.51572	0.736094	0.693057	0.225939
OPTN	YHL045W	79	3.78486	0.615007	0.634149	0.225001
OPTN	YOL075C	15	0.718645	0.805823	0.721894	0.224104
OPTN	YHR136C	23	1.10192	0.828351	0.730096	0.223575
OPTN	YLR082C	47	2.25175	0.760518	0.707166	0.222706
OPTN	YLR216C	7	0.335368	1.3137	0.830937	0.222097
OPTN	YDL077C	37	1.77266	0.678351	0.6778	0.218565
OPTN	YOR285W	54	2.58712	0.798438	0.733507	0.212778
OPTN	YNL226W	7	0.335368	1.23359	0.828703	0.21131
OPTN	YOL036W	39	1.86848	0.686504	0.692763	0.21092
OPTN	YHR139C	20	0.958194	0.851853	0.758084	0.206077
OPTN	YIL013C	25	1.19774	0.778976	0.736255	0.205451
OPTN	YHR022C	45	2.15594	0.713069	0.712477	0.205023
OPTN	YJL070C	88	4.21605	0.62895	0.674771	0.204553
OPTN	YLR137W	37	1.77266	0.961511	0.790812	0.201136
OPTN	YMR029C	29	1.38938	0.846278	0.763498	0.200146
OPTN	YDL010W	34	1.62893	0.762251	0.742257	0.196465
OPTN	YIL055C	65	3.11413	0.680666	0.711675	0.196253
OPTN	YNL099C	52	2.4913	0.70209	0.722962	0.194506
OPTN	YML033W	26	1.24565	0.928456	0.790846	0.194191
OPTN	YNL090W	67	3.20995	0.860418	0.77784	0.191151
OPTN	YDR326C	78	3.73696	0.430355	0.569306	0.185351
OPTN	YOR126C	39	1.86848	0.819962	0.774613	0.184809
OPTN	YNL335W	92	4.40769	0.711001	0.74216	0.183324
OPTN	YBR072W	47	2.25175	0.80713	0.774965	0.181632
OPTN	YJL207C	21	1.0061	0.839843	0.784605	0.180898
OPTN	YPL216W	18	0.862374	0.715266	0.750055	0.178777
OPTN	YOR214C	41	1.9643	0.794385	0.775084	0.17867
OPTN	YMR121C	13	0.622826	1.17047	0.848691	0.177102
OPTN	YDL201W	53	2.53921	0.690036	0.743611	0.176918
OPTN	YOR276W	13	0.622826	0.944445	0.815465	0.174283
OPTN	YPL150W	16	0.766555	0.580762	0.700022	0.174216
OPTN	YJL101C	34	1.62893	0.675354	0.74488	0.172296
OPTN	YHR160C	11	0.527006	0.937681	0.819111	0.169616
OPTN	YOL003C	16	0.766555	0.783926	0.785847	0.16788
OPTN	YJR126C	29	1.38938	0.992348	0.830893	0.167813
OPTN	YDL065C	8	0.383277	1.60083	0.895204	0.16776
OPTN	YMR305C	32	1.53311	0.819519	0.798007	0.165537
OPTN	YIL152W	34	1.62893	0.710689	0.768081	0.164822
OPTN	YPL148C	27	1.29356	0.461086	0.644016	0.164139
OPTN	YHL026C	22	1.05401	0.796471	0.79402	0.164057
OPTN	YDL225W	40	1.91639	0.597023	0.729265	0.161635
OPTN	YDL053C	21	1.0061	0.814579	0.802726	0.160695
OPTN	YJR078W	59	2.82667	0.848668	0.811833	0.159691
OPTN	YOR383C	17	0.814465	0.7294	0.781144	0.159633
OPTN	YER088C	17	0.814465	0.735482	0.783599	0.159159
OPTN	YMR126C	15	0.718645	0.872533	0.820003	0.157053
OPTN	YIL136W	11	0.527006	1.11724	0.86352	0.152481
OPTN	YOR010C	165	7.9051	0.686899	0.785839	0.147107
OPTN	YNL071W	28	1.34147	0.817818	0.820371	0.146904
OPTN	YIL070C	57	2.73085	0.78476	0.814283	0.145744
OPTN	YNL115C	39	1.86848	0.760418	0.81431	0.141202
OPTN	YJL103C	20	0.958194	0.743251	0.811508	0.140097
OPTN	YAL051W	15	0.718645	0.784634	0.82149	0.140065
OPTN	YBR020W	22	1.05401	0.894094	0.84366	0.139783
OPTN	YPL120W	26	1.24565	0.753617	0.815662	0.13892
OPTN	YMR009W	26	1.24565	0.848345	0.837718	0.137671
OPTN	YJR152W	160	7.66555	0.492458	0.72371	0.136061
OPTN	YIL100W	24	1.14983	0.71125	0.816307	0.130652
OPTN	YDR333C	8	0.383277	1.21221	0.89259	0.130203
OPTN	YPL234C	10	0.479097	1.09473	0.881767	0.129433
OPTN	YDL134C	28	1.34147	0.734407	0.825713	0.127998
OPTN	YOL002C	17	0.814465	0.729023	0.833973	0.121038
OPTN	YDL226C	24	1.14983	0.724762	0.833219	0.120876
OPTN	YOR083W	48	2.29966	0.729298	0.835264	0.120141
OPTN	YDR122W	34	1.62893	0.821765	0.855146	0.119036
OPTN	YOL063C	18	0.862374	0.946366	0.874344	0.118916
OPTN	YOR118W	42	2.01221	0.431681	0.731181	0.116044
OPTN	YJL023C	12	0.574916	1.11483	0.899812	0.111693
OPTN	YDL182W	102	4.88679	0.755476	0.853894	0.110379
OPTN	YNL170W	9	0.431187	1.08057	0.900325	0.107706
OPTN	YMR166C	46	2.20385	0.674377	0.842664	0.106104
OPTN	YEL006W	10	0.479097	1.11636	0.906529	0.104347
OPTN	YDR131C	32	1.53311	0.709803	0.857532	0.101124
OPTN	YPL074W	132	6.32408	0.641206	0.849757	0.0963368
OPTN	YMR303C	15	0.718645	1.00004	0.904748	0.0952562
OPTN	YBR260C	31	1.4852	0.686259	0.865272	0.0924585
OPTN	YIL073C	255	12.217	0.377267	0.756137	0.0920014
OPTN	YCL044C	14	0.670736	0.909129	0.899878	0.091024
OPTN	YBL003C	17	0.814465	0.648483	0.860015	0.0907778
OPTN	YER173W	36	1.72475	0.747472	0.880459	0.0893538
OPTN	YLR024C	133	6.37199	0.474636	0.811769	0.0893411
OPTN	YCL038C	50	2.39548	0.520728	0.828687	0.0892075
OPTN	YBR199W	20	0.958194	0.744491	0.880876	0.0886867
OPTN	YOR355W	13	0.622826	0.995771	0.91155	0.0880757
OPTN	YPL023C	29	1.38938	0.601981	0.855743	0.0868401
OPTN	YMR196W	35	1.67684	0.784933	0.889946	0.0863848
OPTN	YLL052C	25	1.19774	0.826771	0.897386	0.0848384
OPTN	YOR011W	67	3.20995	0.568326	0.854558	0.0826587
OPTN	YJL209W	16	0.766555	0.706898	0.884566	0.0816002
OPTN	YLR225C	31	1.4852	0.635341	0.873124	0.0806099
OPTN	YOR279C	24	1.14983	0.787165	0.902885	0.0764458
OPTN	YBL098W	45	2.15594	0.535522	0.858842	0.0755932
OPTN	YLR180W	144	6.89899	0.435137	0.828848	0.0744748
OPTN	YIL094C	7	0.335368	0.935006	0.920537	0.0742986
OPTN	YOR304C-A	22	1.05401	0.652727	0.887849	0.0732038	1
OPTN	YLR136C	17	0.814465	0.83249	0.912203	0.0730903
OPTN	YOR124C	18	0.862374	0.612887	0.881879	0.0723945
OPTN	YBL075C	36	1.72475	0.424095	0.83569	0.0696829
OPTN	YML118W	15	0.718645	0.727196	0.908741	0.0663633
OPTN	YJR084W	78	3.73696	0.572868	0.885405	0.0656479
OPTN	YLR046C	15	0.718645	0.688251	0.906352	0.0644535
OPTN	YER079W	17	0.814465	0.599879	0.899717	0.0601575
OPTN	YDL154W	227	10.8755	0.493166	0.883004	0.0576986
OPTN	YHL024W	10	0.479097	0.468775	0.878154	0.0571181
OPTN	YNL065W	54	2.58712	0.4883	0.888719	0.0543387
OPTN	YPL109C	18	0.862374	0.822797	0.938625	0.0504992
OPTN	YBL002W	15	0.718645	0.667138	0.924729	0.0502159
OPTN	YBR134W	12	0.574916	0.5589	0.91017	0.0502059
OPTN	YHR004C	15	0.718645	0.609492	0.917996	0.0499805
OPTN	YMR156C	28	1.34147	0.628368	0.921618	0.0492529
OPTN	YER067C-A	29	1.38938	0.725722	0.932191	0.0492108
OPTN	YAL059W	10	0.479097	0.823692	0.941897	0.0478592
OPTN	YOR289W	42	2.01221	0.60212	0.921636	0.0471847
OPTN	YDL214C	9	0.431187	1.10229	0.957745	0.0465769
OPTN	YIL014W	12	0.574916	0.97548	0.957024	0.0419219
OPTN	YPL132W	26	1.24565	0.669079	0.937703	0.0416816
OPTN	YBR219C	27	1.29356	0.732232	0.944983	0.0402854
OPTN	YHR153C	21	1.0061	0.637174	0.938868	0.0389519
OPTN	YMR183C	15	0.718645	0.68422	0.943423	0.0387114	0
OPTN	YBR141C	27	1.29356	0.631305	0.938695	0.0387019
OPTN	YDL122W	25	1.19774	0.679463	0.945273	0.0371849
OPTN	YMR008C	50	2.39548	0.564463	0.935735	0.0362752
OPTN	YER151C	16	0.766555	0.771286	0.955511	0.0343138
OPTN	YLR097C	41	1.9643	0.762761	0.957203	0.0326438
OPTN	YHR016C	37	1.77266	0.676933	0.953837	0.0312495
OPTN	YBR019C	33	1.58102	0.601821	0.949267	0.0305319
OPTN	YHR086W	157	7.52182	0.52166	0.942695	0.0298939
OPTN	YLR188W	33	1.58102	0.774293	0.963202	0.0284928
OPTN	YPL227C	12	0.574916	0.824879	0.965657	0.0283286
OPTN	YMR283C	22	1.05401	0.432053	0.935792	0.0277413
OPTN	YLR014C	63	3.01831	0.438308	0.948666	0.0225003
OPTN	YER120W	14	0.670736	0.738224	0.980015	0.0147535
OPTN	YDL217C	9	0.431187	0.888283	0.988344	0.0103538
OPTN	YML106W	20	0.958194	0.733063	0.986093	0.0101951
OPTN	YDL079C	28	1.34147	0.815555	0.988762	0.00916493
OPTN	YPL170W	19	0.910284	0.544061	0.983886	0.00876723
OPTN	YOR009W	59	2.82667	0.575077	0.984767	0.00876029
OPTN	YJR092W	96	4.59933	0.48948	0.983928	0.00786698
OPTN	YNL279W	470	22.5175	0.2993	0.974723	0.00756544
OPTN	YBR094W	21	1.0061	0.61931	0.990415	0.00593636
OPTN	YLR021W	20	0.958194	0.628702	0.991157	0.00555939
OPTN	YOR028C	75	3.59323	0.489954	0.990634	0.00458868
OPTN	YAR023C	16	0.766555	0.287326	0.986667	0.00383087
OPTN	YMR234W	46	2.20385	0.539358	0.994009	0.00323142
OPTN	YHL042W	48	2.29966	0.627931	0.996403	0.00225894
OPTN	YMR168C	4	0.191639	1.66609	0.999458	0.000902483
BMP15	YDR216W	265	14.1644	5.04807	0.0687985	4.70077
BMP15	YDL231C	450	24.0527	4.98139	0.0595528	4.68474
BMP15	YDR028C	411	21.9682	4.90381	0.060996	4.6047
BMP15	YMR016C	98	5.23815	4.83611	0.121224	4.24986
BMP15	YDR218C	102	5.45195	4.80426	0.123124	4.21274
BMP15	YIL120W	421	22.5027	4.53867	0.081842	4.16722
BMP15	YDL230W	181	9.67455	4.62061	0.104423	4.13811
BMP15	YDR192C	380	20.3112	4.4563	0.072975	4.1311
BMP15	YBR034C	74	3.95534	4.63231	0.13486	4.0076
BMP15	YNL201C	102	5.45195	4.57626	0.138225	3.9437
BMP15	YML079W	108	5.77266	4.40055	0.123678	3.8563
BMP15	YOR324C	170	9.08659	4.01019	0.113996	3.55305
BMP15	YHL024W	36	1.92422	4.32083	0.19886	3.46159
BMP15	YOR237W	39	2.08457	4.23422	0.184396	3.45345
BMP15	YDL239C	85	4.5433	4.13879	0.17276	3.42377
BMP15	YOR233W	184	9.8349	3.85901	0.116919	3.40782
BMP15	YJR115W	143	7.64343	3.75146	0.102893	3.36547
BMP15	YDR031W	141	7.53652	3.81824	0.130093	3.32151
BMP15	YDR094W	95	5.0778	3.91652	0.167098	3.26207
BMP15	YJR107W	228	12.1867	3.71669	0.122761	3.26042
BMP15	YDR084C	106	5.66576	3.83272	0.163733	3.20518
BMP15	YOR193W	59	3.15358	3.87761	0.183279	3.16693
BMP15	YDR107C	172	9.19349	3.50371	0.114621	3.10211
BMP15	YJL021C	86	4.59675	3.66971	0.16152	3.07698
BMP15	YHR047C	57	3.04668	3.72252	0.181052	3.04855
BMP15	YOR315W	31	1.65697	3.97353	0.2391	3.02346
BMP15	YER172C	82	4.38294	3.45276	0.174833	2.8491
BMP15	YML054C	83	4.43639	3.42757	0.170093	2.84456
BMP15	YJL101C	61	3.26048	3.55478	0.209268	2.81087
BMP15	YJR124C	56	2.99323	3.45213	0.216269	2.70554
BMP15	YPL073C	44	2.35182	3.44588	0.242386	2.61065
BMP15	YHL019C	30	1.60352	3.532	0.273164	2.56718
BMP15	YOR381W	94	5.02435	3.1943	0.199848	2.55592
BMP15	YDL215C	105	5.61231	3.1599	0.206639	2.50694
BMP15	YML048W	11	0.587956	4.05947	0.397339	2.44649
BMP15	YBR018C	39	2.08457	3.31342	0.272089	2.41188
BMP15	YIL089W	144	7.69688	3.09841	0.227217	2.39439
BMP15	YDR007W	96	5.13125	2.85404	0.178599	2.34431
BMP15	YIL015W	31	1.65697	3.43499	0.319442	2.33771
BMP15	YDR222W	25	1.33626	3.37071	0.308783	2.32989
BMP15	YML121W	13	0.694857	3.58523	0.381518	2.2174
BMP15	YOL003C	28	1.49661	3.0891	0.291591	2.18835
BMP15	YDL169C	106	5.66576	2.91908	0.251301	2.18551
BMP15	YBR156C	20	1.06901	3.16266	0.328749	2.12294
BMP15	YDR073W	54	2.88633	2.83427	0.269807	2.06956
BMP15	YBL045C	18	0.96211	3.24783	0.368787	2.05007
BMP15	YHR006W	103	5.5054	2.75123	0.256996	2.04417
BMP15	YMR184W	57	3.04668	2.83696	0.285736	2.02634
BMP15	YOR238W	24	1.28281	2.9733	0.322039	2.01578
BMP15	YOR253W	51	2.72598	2.96252	0.345132	1.94006
BMP15	YNL075W	19	1.01556	2.89094	0.338077	1.91358
BMP15	YDR004W	15	0.801758	3.12979	0.40208	1.87136
BMP15	YDR206W	45	2.40527	2.59222	0.283218	1.85806
BMP15	YLL014W	19	1.01556	2.96596	0.381754	1.83369
BMP15	YDR128W	89	4.7571	2.37006	0.227559	1.83073
BMP15	YDR326C	127	6.78822	2.16052	0.159854	1.81515
BMP15	YDL203C	128	6.84167	2.34742	0.230113	1.80725
BMP15	YPL187W	51	2.72598	2.65473	0.319778	1.80581
BMP15	YDR194C	14	0.748307	2.92507	0.387718	1.79097
BMP15	YOR012W	104	5.55886	2.5152	0.288992	1.78833
BMP15	YMR180C	97	5.1847	2.40526	0.262037	1.77499
BMP15	YNL122C	130	6.94857	2.16275	0.189515	1.75287
BMP15	YBR048W	12	0.641406	3.09684	0.434217	1.75214
BMP15	YHR146W	31	1.65697	2.48871	0.300609	1.74058
BMP15	YNL322C	165	8.81934	2.23823	0.23445	1.71348
BMP15	YEL038W	51	2.72598	2.39375	0.284447	1.71285
BMP15	YPL138C	38	2.03112	2.44	0.306938	1.69107
BMP15	YMR251W-A	17	0.908659	2.63268	0.358733	1.68825
BMP15	YOR365C	27	1.44316	2.51075	0.333842	1.67256
BMP15	YHR181W	31	1.65697	2.46198	0.329858	1.64988
BMP15	YIL055C	82	4.38294	2.23814	0.269239	1.63555
BMP15	YJR049C	58	3.10013	2.24725	0.281789	1.614
BMP15	YJR110W	60	3.20703	2.25425	0.291062	1.59812
BMP15	YHL046C	15	0.801758	2.82082	0.443882	1.56871
BMP15	YDR121W	33	1.76387	2.51707	0.382784	1.55358
BMP15	YOR215C	25	1.33626	2.37657	0.352937	1.53779
BMP15	YPL250C	26	1.38971	2.52702	0.404404	1.50508
BMP15	YLR024C	160	8.55208	1.95916	0.238924	1.49107
BMP15	YBR208C	52	2.77943	2.25369	0.339584	1.48838
BMP15	YOR061W	17	0.908659	2.37103	0.37471	1.48258
BMP15	YOR276W	18	0.96211	2.43124	0.412965	1.42723
BMP15	YBL098W	60	3.20703	2.0071	0.292759	1.4195
BMP15	YDR051C	71	3.79499	1.88557	0.259148	1.39693
BMP15	YPL032C	52	2.77943	2.1335	0.345298	1.3968
BMP15	YDR101C	68	3.63464	1.95333	0.29039	1.38611
BMP15	YBL056W	20	1.06901	2.42564	0.430991	1.38021
BMP15	YER141W	19	1.01556	2.40702	0.432173	1.36677
BMP15	YOR054C	30	1.60352	2.1769	0.378156	1.35369
BMP15	YHR001W-A	63	3.36738	2.14393	0.368957	1.35291
BMP15	YBR214W	16	0.855208	2.36259	0.429741	1.34729
BMP15	YER024W	37	1.97767	2.11429	0.368	1.33623
BMP15	YOR197W	31	1.65697	2.17387	0.392838	1.31989
BMP15	YLR152C	45	2.40527	1.99445	0.34131	1.31372
BMP15	YJR075W	55	2.93978	1.96806	0.333019	1.31266
BMP15	YBR226C	58	3.10013	1.91522	0.314735	1.31244
BMP15	YBR043C	35	1.87077	2.06298	0.368498	1.30277
BMP15	YMR294W-A	20	1.06901	2.14112	0.396351	1.29249
BMP15	YDL236W	125	6.68132	1.78706	0.280228	1.28628
BMP15	YNL148C	6	0.320703	2.93588	0.566944	1.2714
BMP15	YML109W	64	3.42083	1.87317	0.32186	1.27027
BMP15	YJL215C	42	2.24492	1.93662	0.349058	1.26063
BMP15	YDR006C	92	4.91745	1.90072	0.347185	1.24082
BMP15	YLL055W	31	1.65697	1.91442	0.360274	1.2247
BMP15	YOR023C	52	2.77943	1.93669	0.372916	1.21447
BMP15	YDR089W	258	13.7902	1.77271	0.320325	1.20487
BMP15	YBR170C	32	1.71042	2.00448	0.400468	1.20175
BMP15	YOR213C	17	0.908659	2.10459	0.433039	1.19322
BMP15	YLR052W	11	0.587956	2.43084	0.512327	1.18546
BMP15	YOL068C	15	0.801758	2.33291	0.499503	1.16762
BMP15	YOR120W	10	0.534505	2.37092	0.512764	1.1552
BMP15	YMR161W	51	2.72598	1.8646	0.387747	1.14161
BMP15	YBR212W	47	2.51217	1.81416	0.378613	1.12729
BMP15	YOR163W	26	1.38971	1.9097	0.426358	1.09548
BMP15	YJR004C	110	5.87956	1.63069	0.331085	1.09079
BMP15	YHL044W	28	1.49661	1.86132	0.415054	1.08877
BMP15	YAR028W	38	2.03112	1.89681	0.426929	1.08701
BMP15	YPR001W	28	1.49661	1.94113	0.444141	1.079
BMP15	YHR045W	92	4.91745	1.83582	0.422825	1.05959
BMP15	YEL016C	72	3.84844	1.54045	0.322239	1.04406
BMP15	YOR290C	10	0.534505	2.26932	0.540869	1.04191
BMP15	YOL030W	37	1.97767	1.81029	0.429133	1.03344
BMP15	YBR173C	9	0.481055	2.40228	0.570231	1.03242
BMP15	YPL033C	25	1.33626	1.7851	0.425539	1.02547
BMP15	YPL030W	44	2.35182	1.53922	0.345848	1.00688
BMP15	YJR102C	16	0.855208	1.91205	0.47679	1.0004
BMP15	YMR299C	30	1.60352	1.79316	0.442735	0.999263
BMP15	YLL042C	50	2.67253	1.62674	0.387171	0.99691
BMP15	YHR189W	23	1.22936	1.98358	0.498342	0.995078
BMP15	YML026C	12	0.641406	1.95481	0.498976	0.979405
BMP15	YIL038C	25	1.33626	1.92683	0.492133	0.978574
BMP15	YBR074W	56	2.99323	1.51559	0.358151	0.972781
BMP15	YPL176C	30	1.60352	1.79486	0.462069	0.965508
BMP15	YJL068C	94	5.02435	1.5816	0.396932	0.953811
BMP15	YDR125C	59	3.15358	1.30375	0.279385	0.939498
BMP15	YOR326W	11	0.587956	2.09442	0.551609	0.939122
BMP15	YML051W	85	4.5433	1.52785	0.389705	0.932441
BMP15	YAL066W	29	1.55007	1.70437	0.458907	0.922222
BMP15	YPL108W	14	0.748307	1.89051	0.513581	0.919583
BMP15	YBR249C	25	1.33626	1.72095	0.468853	0.914078
BMP15	YOR255W	30	1.60352	1.59371	0.428739	0.910424
BMP15	YDL210W	55	2.93978	1.4144	0.356873	0.909638
BMP15	YOR330C	10	0.534505	1.79453	0.501567	0.894451
BMP15	YHR092C	13	0.694857	1.99002	0.555564	0.884434
BMP15	YPL273W	14	0.748307	1.73324	0.490439	0.883195
BMP15	YIL141W	48	2.56563	1.55306	0.435085	0.877347
BMP15	YNL301C	21	1.12246	1.75867	0.502904	0.874229
BMP15	YJR088C	12	0.641406	1.87294	0.533771	0.873217
BMP15	YNL265C	17	0.908659	1.65532	0.475276	0.868584
BMP15	YBR058C	25	1.33626	1.54512	0.438587	0.867453
BMP15	YJL022W	16	0.855208	1.86357	0.535551	0.865535
BMP15	YNL128W	31	1.65697	1.47472	0.413289	0.865235
BMP15	YLR020C	65	3.47428	1.40365	0.387754	0.85938
BMP15	YML080W	40	2.13802	1.38058	0.382967	0.85186
BMP15	YNL266W	38	2.03112	1.49079	0.429491	0.850509
BMP15	YJR109C	118	6.30716	1.29105	0.350843	0.838094
BMP15	YDL122W	29	1.55007	1.60517	0.477911	0.83804
BMP15	YPL079W	16	0.855208	1.89149	0.561319	0.829761
BMP15	YPR003C	28	1.49661	1.61854	0.48945	0.826347
BMP15	YDR130C	38	2.03112	1.66707	0.505727	0.823987
BMP15	YDL233W	833	44.5243	1.08887	0.24349	0.823738
BMP15	YOR266W	14	0.748307	1.6198	0.498038	0.813077
BMP15	YOR346W	30	1.60352	1.4926	0.456504	0.811225
BMP15	YJL055W	29	1.55007	1.59899	0.493486	0.809913
BMP15	YOR186W	8	0.427604	2.01997	0.602153	0.803638
BMP15	YLR006C	12	0.641406	1.75037	0.543451	0.799127
BMP15	YJL092W	16	0.855208	1.70844	0.534091	0.795978
BMP15	YPL226W	902	48.2124	1.01055	0.214091	0.794199
BMP15	YLR042C	27	1.44316	1.48504	0.465861	0.793217
BMP15	YBR094W	25	1.33626	1.52303	0.487094	0.781174
BMP15	YBL079W	8	0.427604	2.2489	0.653559	0.779112
BMP15	YHR202W	25	1.33626	1.56206	0.502229	0.777549
BMP15	YBR012C	39	2.08457	1.33091	0.418921	0.773364
BMP15	YLR023C	32	1.71042	1.41001	0.451655	0.773172
BMP15	YNL142W	13	0.694857	1.72525	0.552472	0.772098
BMP15	YMR026C	9	0.481055	1.9624	0.606867	0.771485
BMP15	YLR001C	32	1.71042	1.41133	0.457467	0.765695
BMP15	YNL079C	10	0.534505	1.81713	0.584205	0.755555
BMP15	YBR067C	46	2.45872	1.38662	0.459227	0.749847
BMP15	YDR132C	18	0.96211	1.63732	0.544686	0.745495
BMP15	YOR040W	61	3.26048	1.17307	0.379725	0.727625
BMP15	YAL043C-a	28	1.49661	1.4607	0.503915	0.724632
BMP15	YPL060W	18	0.96211	1.57079	0.541623	0.720013
BMP15	YBL057C	23	1.22936	1.41143	0.497548	0.709177
BMP15	YCR018C	59	3.15358	1.38605	0.501734	0.690624
BMP15	YBL101C	29	1.55007	1.38496	0.508006	0.681393
BMP15	YBL060W	144	7.69688	1.1155	0.392642	0.677509
BMP15	YJR108W	73	3.90189	1.20603	0.440485	0.674793
BMP15	YBR229C	68	3.63464	1.13161	0.408486	0.669365
BMP15	YMR210W	101	5.3985	1.1986	0.446263	0.66371
BMP15	YER140W	32	1.71042	1.4523	0.546716	0.658304
BMP15	YJR097W	189	10.1022	1.0272	0.376287	0.640675
BMP15	YOR155C	71	3.79499	1.20502	0.468875	0.640018
BMP15	YJL130C	26	1.38971	1.35815	0.529542	0.638953
BMP15	YPL258C	18	0.96211	1.37715	0.539656	0.633962
BMP15	YBR063C	27	1.44316	1.36326	0.536639	0.631683
BMP15	YLR176C	19	1.01556	1.44531	0.564229	0.629824
BMP15	YMR123W	10	0.534505	1.3588	0.538306	0.627351
BMP15	YOR195W	18	0.96211	1.44258	0.567398	0.624065
BMP15	YMR154C	135	7.21582	0.980903	0.36524	0.622638
BMP15	YLL063C	18	0.96211	1.50446	0.587317	0.620864
BMP15	YAL045C	24	1.28281	1.30136	0.524864	0.618324
BMP15	YJL112W	89	4.7571	1.06828	0.423291	0.616088
BMP15	YIL073C	257	13.7368	0.929124	0.342236	0.611145
BMP15	YDL123W	97	5.1847	0.78787	0.229197	0.607292
BMP15	YBL070C	26	1.38971	1.34	0.549722	0.603374
BMP15	YHR182W	24	1.28281	1.4825	0.594238	0.601542
BMP15	YDR011W	63	3.36738	1.20648	0.502827	0.599829
BMP15	YOR355W	14	0.748307	1.64291	0.636706	0.596859
BMP15	YJR038C	25	1.33626	1.43782	0.586447	0.594614
BMP15	YHR179W	24	1.28281	1.43362	0.58943	0.588602
BMP15	YDR143C	98	5.23815	0.997984	0.411882	0.586932
BMP15	YMR254C	13	0.694857	1.35045	0.569389	0.581518
BMP15	YDR142C	7	0.374154	1.62039	0.641938	0.580198
BMP15	YOR314W	7	0.374154	1.74233	0.668946	0.576806
BMP15	YDR230W	11	0.587956	1.48847	0.615939	0.571664
BMP15	YNL300W	15	0.801758	1.43716	0.605318	0.567223
BMP15	YPL261C	30	1.60352	1.25981	0.555424	0.560083
BMP15	YMR252C	107	5.71921	1.01092	0.446338	0.55971
BMP15	YMR158W-A	26	1.38971	1.26866	0.569139	0.546616
BMP15	YBR144C	19	1.01556	1.38134	0.611682	0.5364
BMP15	YOR279C	25	1.33626	1.33986	0.601175	0.534368
BMP15	YDR019C	78	4.16914	1.20624	0.571422	0.516969
BMP15	YML100W	22	1.17591	1.07033	0.518376	0.515496
BMP15	YMR145C	57	3.04668	1.24566	0.589	0.511969
BMP15	YMR255W	34	1.81732	1.39752	0.634029	0.51145
BMP15	YOL025W	20	1.06901	1.33115	0.617424	0.509268
BMP15	YBR185C	22	1.17591	1.20922	0.580851	0.506842
BMP15	YER139C	25	1.33626	1.22129	0.586185	0.505387
BMP15	YIL140W	41	2.19147	1.1104	0.548697	0.501128
BMP15	YER049W	22	1.17591	1.35638	0.631442	0.499906
BMP15	YCL050C	33	1.76387	1.1505	0.570397	0.49426
BMP15	YLR164W	42	2.24492	1.05356	0.535484	0.489397
BMP15	YLR084C	19	1.01556	1.28674	0.619694	0.489353
BMP15	YBR263W	17	0.908659	1.13587	0.569429	0.489073
BMP15	YJL134W	42	2.24492	1.22453	0.603695	0.485286
BMP15	YAL019W	27	1.44316	1.24435	0.611537	0.483383
BMP15	YHR167W	15	0.801758	1.54964	0.689403	0.481314
BMP15	YJL141C	8	0.427604	1.90166	0.748016	0.479187
BMP15	YOR079C	28	1.49661	1.19354	0.608016	0.467848
BMP15	YAL059W	11	0.587956	1.37106	0.658955	0.467595
BMP15	YMR216C	12	0.641406	1.66771	0.720531	0.466073
BMP15	YER150W	6	0.320703	1.78775	0.740223	0.464417
BMP15	YJR035W	30	1.60352	1.1439	0.595198	0.463054
BMP15	YLL016W	29	1.55007	1.18813	0.616778	0.455318
BMP15	YDR248C	24	1.28281	1.35033	0.66338	0.454549
BMP15	YER067W	28	1.49661	1.23793	0.638775	0.447173
BMP15	YJL048C	64	3.42083	1.16338	0.617482	0.445015
BMP15	YMR159C	87	4.6502	0.92884	0.522784	0.443257
BMP15	YOR342C	80	4.27604	0.888298	0.504395	0.440245
BMP15	YDL034W	17	0.908659	1.27118	0.658003	0.43474
BMP15	YER071C	30	1.60352	1.08757	0.605061	0.429523
BMP15	YJR126C	28	1.49661	1.32818	0.678317	0.427254
BMP15	YDL134C	28	1.49661	1.09841	0.613667	0.424351
BMP15	YML116W	55	2.93978	1.04881	0.599533	0.420015
BMP15	YPL148C	29	1.55007	0.760495	0.44911	0.418949
BMP15	YJL193W	17	0.908659	1.35225	0.692406	0.415943
BMP15	YMR157C	34	1.81732	1.07685	0.614592	0.415027
BMP15	YJR048W	20	1.06901	1.12633	0.632293	0.41416
BMP15	YDL197C	69	3.68809	0.980598	0.578613	0.413211
BMP15	YOL070C	23	1.22936	1.10485	0.630751	0.407967
BMP15	YPL052W	21	1.12246	1.0086	0.600778	0.402655
BMP15	YJL012C	38	2.03112	0.951253	0.577909	0.401515
BMP15	YAL068C	30	1.60352	1.04712	0.616805	0.40125
BMP15	YIL168W	45	2.40527	0.959496	0.582071	0.401002
BMP15	YML081W	30	1.60352	1.13676	0.648016	0.400119
BMP15	YMR070W	12	0.641406	1.25083	0.685174	0.393794
BMP15	YDL072C	18	0.96211	1.07749	0.636628	0.391531
BMP15	YBL095W	367	19.6163	0.693579	0.440216	0.388254
BMP15	YLR112W	105	5.61231	0.880294	0.563131	0.384573
BMP15	YOR273C	303	16.1955	0.664842	0.422275	0.384096
BMP15	YBL091C	27	1.44316	1.01331	0.623193	0.381823
BMP15	YPL087W	22	1.17591	0.993395	0.61661	0.380857
BMP15	YER078C	20	1.06901	1.16259	0.672842	0.380351
BMP15	YOR033C	13	0.694857	1.18392	0.679057	0.379972
BMP15	YML028W	16	0.855208	1.07242	0.646875	0.3787
BMP15	YML082W	50	2.67253	1.11133	0.663857	0.373564
BMP15	YIR004W	9	0.481055	1.30391	0.714322	0.3725
BMP15	YOR274W	34	1.81732	1.29182	0.713085	0.370643
BMP15	YHR132C	22	1.17591	1.27276	0.713289	0.364914
BMP15	YMR196W	34	1.81732	1.12399	0.68101	0.358543
BMP15	YIL032C	17	0.908659	1.05376	0.663533	0.354555
BMP15	YHL028W	18	0.96211	1.17037	0.697413	0.354138
BMP15	YJL007C	42	2.24492	0.932687	0.623267	0.351374
BMP15	YML052W	64	3.42083	0.939259	0.628931	0.34853
BMP15	YOR016C	38	2.03112	0.798332	0.567059	0.34563
BMP15	YDR097C	33	1.76387	1.00947	0.660574	0.34264
BMP15	YOR280C	44	2.35182	0.974745	0.651786	0.33942
BMP15	YEL020C	33	1.76387	0.884946	0.619148	0.337034
BMP15	YHR193C	14	0.748307	1.0012	0.664384	0.336021
BMP15	YLR181C	13	0.694857	1.23939	0.732647	0.331354
BMP15	YDL170W	155	8.28483	0.820003	0.598889	0.328912
BMP15	YPR004C	23	1.22936	0.844785	0.615837	0.324535
BMP15	YPL248C	30	1.60352	1.02504	0.68483	0.323062
BMP15	YJR070C	18	0.96211	0.994658	0.679708	0.318581
BMP15	YPL240C	23	1.22936	0.957505	0.667686	0.318193
BMP15	YML097C	14	0.748307	1.11886	0.719978	0.313305
BMP15	YHR185C	32	1.71042	1.04672	0.701441	0.312509
BMP15	YNL231C	12	0.641406	1.17229	0.737443	0.307793
BMP15	YEL004W	55	2.93978	1.0249	0.699841	0.307633
BMP15	YBR077C	10	0.534505	1.2147	0.747109	0.307187
BMP15	YLR025W	26	1.38971	0.977349	0.689974	0.303004
BMP15	YOR219C	20	1.06901	0.942715	0.679926	0.301739
BMP15	YER046W-A	8	0.427604	1.47733	0.796263	0.300987
BMP15	YOR376W	45	2.40527	0.952048	0.685234	0.299672
BMP15	YML128C	15	0.801758	1.07273	0.728322	0.291436
BMP15	YLR092W	17	0.908659	1.20737	0.759876	0.289919
BMP15	YMR040W	12	0.641406	1.25868	0.770923	0.288336
BMP15	YER167W	25	1.33626	0.900651	0.684946	0.283754
BMP15	YCL075W	107	5.71921	0.607242	0.533284	0.28341
BMP15	YER089C	35	1.87077	1.05336	0.732076	0.28222
BMP15	YMR169c	25	1.33626	0.916501	0.692288	0.282018
BMP15	YLR177W	25	1.33626	1.15339	0.75691	0.280377
BMP15	YOL001W	11	0.587956	1.37756	0.799803	0.275783
BMP15	YJL107C	65	3.47428	0.918651	0.700142	0.275465
BMP15	YOR291W	29	1.55007	0.904411	0.696075	0.274873
BMP15	YBR069C	36	1.92422	0.766822	0.643849	0.273104
BMP15	YJL078C	67	3.58119	0.731731	0.63231	0.26905
BMP15	YDR155C	15	0.801758	1.04265	0.748618	0.262104
BMP15	YLL058W	58	3.10013	0.882079	0.70522	0.260019
BMP15	YHR161C	23	1.22936	0.819642	0.685783	0.257545
BMP15	YMR115W	20	1.06901	0.855691	0.702289	0.254748
BMP15	YHR106W	33	1.76387	0.761597	0.675247	0.247331
BMP15	YOR243C	16	0.855208	1.00443	0.753764	0.247327
BMP15	YNL285W	5	0.267253	2.08115	0.882938	0.243624
BMP15	YCL039W	87	4.6502	0.747717	0.679598	0.23957
BMP15	YLR207W	20	1.06901	0.927515	0.74358	0.237834
BMP15	YAL055W	11	0.587956	1.10551	0.787875	0.234506
BMP15	YOR121C	7	0.374154	1.2306	0.810323	0.233417
BMP15	YML084W	70	3.74154	0.653341	0.655028	0.225385
BMP15	YOR322C	13	0.694857	0.859802	0.739374	0.224087
BMP15	YLR110C	54	2.88633	0.804722	0.724714	0.221529
BMP15	YMR129W	31	1.65697	0.87682	0.749485	0.219656
BMP15	YLR170C	16	0.855208	0.852792	0.743058	0.219118
BMP15	YJL058C	72	3.84844	0.672385	0.682396	0.213552
BMP15	YOR267C	12	0.641406	1.08181	0.805173	0.210766
BMP15	YBR172C	179	9.56764	0.476023	0.559513	0.209682
BMP15	YPL008W	5	0.267253	1.67831	0.875439	0.209051
BMP15	YJL216C	48	2.56563	0.681076	0.696183	0.206922
BMP15	YJR133W	101	5.3985	0.692912	0.70215	0.206384
BMP15	YIL052C	37	1.97767	0.787195	0.738432	0.205905
BMP15	YCL013W	11	0.587956	1.05469	0.807673	0.202844
BMP15	YNL212W	26	1.38971	0.87543	0.770251	0.20113
BMP15	YOR140W	120	6.41406	0.628768	0.683252	0.199161
BMP15	YOR283W	39	2.08457	0.799072	0.751524	0.19855
BMP15	YLR062C	6	0.320703	1.3675	0.854879	0.198453
BMP15	YOR351C	15	0.801758	1.00399	0.805656	0.195119
BMP15	YBR177C	11	0.587956	0.900978	0.788407	0.190641
BMP15	YMR132C	26	1.38971	0.876749	0.783957	0.189416
BMP15	YLR014C	60	3.20703	0.640015	0.704943	0.188841
BMP15	YML099C	15	0.801758	1.13812	0.83631	0.186299
BMP15	YAL004W	35	1.87077	0.937002	0.80215	0.185386
BMP15	YNL135C	13	0.694857	1.08533	0.829269	0.185299
BMP15	YJL106W	42	2.24492	0.78556	0.766994	0.18304
BMP15	YBL103C	16	0.855208	0.811423	0.779067	0.17927
BMP15	YDR119W	63	3.36738	0.775137	0.769835	0.17841
BMP15	YMR320W	88	4.70365	0.651693	0.731123	0.175225
BMP15	YLR131C	139	7.42962	0.581355	0.704435	0.171828
BMP15	YPL260W	12	0.641406	1.00976	0.830737	0.170915
BMP15	YDR153C	1267	67.7218	0.408536	0.583015	0.170354
BMP15	YJL083W	58	3.10013	0.674099	0.750366	0.168278
BMP15	YLR136C	16	0.855208	0.986008	0.831208	0.16643
BMP15	YIL145C	63	3.36738	0.770783	0.788521	0.163004
BMP15	YNL230C	14	0.748307	0.871865	0.813333	0.162748
BMP15	YEL065W	55	2.93978	0.752815	0.78471	0.162073
BMP15	YJR073C	14	0.748307	0.982474	0.835615	0.161504
BMP15	YIR016W	303	16.1955	0.645276	0.75155	0.160319
BMP15	YHR153C	20	1.06901	0.805194	0.806448	0.155847
BMP15	YPL196W	30	1.60352	0.950263	0.839554	0.152466
BMP15	YOR124C	17	0.908659	0.733456	0.796592	0.149191
BMP15	YDR310C	15	0.801758	0.711567	0.791101	0.148646
BMP15	YOL039W	14	0.748307	0.943002	0.84406	0.147052
BMP15	YDR293C	8	0.427604	0.908431	0.838242	0.146946
BMP15	YJL073W	176	9.40729	0.478821	0.695336	0.145879
BMP15	YHL014C	128	6.84167	0.559615	0.744916	0.142749
BMP15	YLR203C	18	0.96211	0.814759	0.824882	0.142679
BMP15	YDL018C	23	1.22936	0.868546	0.840819	0.138256
BMP15	YDR330W	5	0.267253	1.41665	0.902727	0.137801
BMP15	YMR192W	39	2.08457	0.951879	0.855278	0.137758
BMP15	YLR224W	527	28.1684	0.558621	0.765199	0.131165
BMP15	YJR040W	17	0.908659	0.956073	0.862982	0.131
BMP15	YER079W	16	0.855208	0.708902	0.821589	0.126476
BMP15	YBL081W	6	0.320703	1.06301	0.881125	0.126364
BMP15	YBR221C	6	0.320703	1.5354	0.918851	0.124597
BMP15	YPL114W	38	2.03112	0.7837	0.843728	0.122471
BMP15	YLR021W	19	1.01556	0.792094	0.852784	0.116609
BMP15	YAL053W	33	1.76387	0.710113	0.839507	0.113968
BMP15	YDL154W	206	11.0108	0.572712	0.805898	0.111165
BMP15	YOL014W	173	9.24694	0.406978	0.730643	0.109623
BMP15	YCR023C	26	1.38971	0.742553	0.853251	0.108969
BMP15	YOL055C	23	1.22936	0.733034	0.851885	0.108573
BMP15	YCL057W	8	0.427604	1.08453	0.901346	0.106993
BMP15	YNL294C	108	5.77266	0.562651	0.81135	0.106144
BMP15	YDL061C	8	0.427604	0.962344	0.894325	0.101696
BMP15	YPL021W	18	0.96211	0.877083	0.887588	0.0985945
BMP15	YBR240C	42	2.24492	0.685767	0.859052	0.0966578
BMP15	YEL056W	30	1.60352	0.728432	0.867736	0.0963456
BMP15	YDR290W	87	4.6502	0.776785	0.87739	0.0952414
BMP15	YLR171W	19	1.01556	0.99507	0.905478	0.0940558
BMP15	YOR235W	4	0.213802	2.30783	0.960214	0.0918187
BMP15	YML031W	48	2.56563	0.68222	0.868677	0.0895913
BMP15	YLR095C	20	1.06901	0.687926	0.870406	0.0891513
BMP15	YDL161W	91	4.864	0.30226	0.705879	0.088901
BMP15	YNL321W	41	2.19147	0.691507	0.871892	0.0885875
BMP15	YDR256C	25	1.33626	0.628486	0.864039	0.0854499
BMP15	YMR034C	49	2.61908	0.682513	0.875114	0.0852365
BMP15	YLR133W	22	1.17591	0.727847	0.886223	0.0828122
BMP15	YML058W	33	1.76387	0.671984	0.87698	0.0826673
BMP15	YOR229W	10	0.534505	1.0028	0.918463	0.0817647
BMP15	YJR092W	88	4.70365	0.59395	0.86367	0.0809735
BMP15	YHR200W	7	0.374154	0.911996	0.911371	0.0808297
BMP15	YJL071W	21	1.12246	0.711876	0.888104	0.0796558
BMP15	YPL245W	22	1.17591	0.738894	0.89485	0.077695
BMP15	YER001W	30	1.60352	0.795898	0.905185	0.0754634
BMP15	YOR162C	9	0.481055	0.881568	0.91569	0.0743249
BMP15	YOR024W	28	1.49661	0.690369	0.89582	0.0719229
BMP15	YMR274C	57	3.04668	0.755835	0.905542	0.0713944
BMP15	YIL002C	19	1.01556	0.739302	0.908613	0.0675624
BMP15	YMR228W	6	0.320703	1.46303	0.954433	0.0666659
BMP15	YPL145C	19	1.01556	0.821491	0.91888	0.0666392
BMP15	YJL155C	9	0.481055	0.939833	0.930049	0.0657423
BMP15	YIL042C	15	0.801758	0.780868	0.917573	0.0643649
BMP15	YBR052C	20	1.06901	0.722983	0.911209	0.0641946
BMP15	YML038C	52	2.77943	0.609904	0.900733	0.0605431
BMP15	YEL011W	58	3.10013	0.396853	0.862385	0.0546129
BMP15	YPL036W	67	3.58119	0.465697	0.891636	0.050465
BMP15	YJR087W	48	2.56563	0.51529	0.905791	0.0485448
BMP15	YER019C-A	14	0.748307	0.932505	0.949168	0.0474013
BMP15	YDL114W	40	2.13802	0.601403	0.926327	0.0443073
BMP15	YMR103C	22	1.17591	0.775998	0.947785	0.0405187
BMP15	YHR108W	28	1.49661	0.477795	0.917642	0.0393501
BMP15	YDL149W	69	3.68809	0.691806	0.945277	0.0378574
BMP15	YAL051W	13	0.694857	0.703527	0.950303	0.0349634
BMP15	YHR003C	77	4.11569	0.440767	0.921091	0.0347804
BMP15	YDL242W	99	5.2916	0.579475	0.941503	0.0338975
BMP15	YLR102C	8	0.427604	0.879714	0.965249	0.0305709
BMP15	YJL158C	25	1.33626	0.555562	0.946817	0.0295465
BMP15	YOL056W	19	1.01556	0.767081	0.967165	0.0251869
BMP15	YDR273W	14	0.748307	0.79573	0.968419	0.0251303
BMP15	YPL147W	35	1.87077	0.493787	0.950554	0.0244156
BMP15	YLL057C	30	1.60352	0.726862	0.966561	0.0243055
BMP15	YIL054W	35	1.87077	0.552708	0.959734	0.0222551
BMP15	YNL107W	9	0.481055	0.872549	0.976643	0.0203805
BMP15	YJR053W	25	1.33626	0.586662	0.967832	0.0188716
BMP15	YBR022W	25	1.33626	0.5713	0.97502	0.0142709
BMP15	YDR059C	92	4.91745	0.484584	0.971186	0.0139626
BMP15	YLL051C	30	1.60352	0.433263	0.969562	0.0131875
BMP15	YDR333C	7	0.374154	1.14054	0.988733	0.0128499
BMP15	YNL115C	34	1.81732	0.656739	0.980588	0.0127488
BMP15	YML090W	26	1.38971	0.641791	0.98046	0.0125404
BMP15	YOL006C	10	0.534505	0.760609	0.983649	0.0124364
BMP15	YMR012W	84	4.48984	0.342643	0.967917	0.0109929
BMP15	YIL029C	18	0.96211	0.728503	0.987878	0.00883073
BMP15	YAR014C	12	0.641406	0.765342	0.989935	0.00770307
BMP15	YEL040W	34	1.81732	0.673624	0.990943	0.00610103
BMP15	YDR191W	36	1.92422	0.566078	0.989544	0.00591903
BMP15	YOR081C	39	2.08457	0.243099	0.988379	0.00282505
BMP15	YDR068W	315	16.8369	0.232922	0.990706	0.00216466
APOL1	YDR026C	104	6.25333	2.94868	0.196002	2.37074
APOL1	YDL199C	79	4.75012	2.82331	0.228636	2.1778
APOL1	YIL001W	46	2.76589	2.97807	0.281467	2.13984
APOL1	YNL266W	45	2.70577	2.78176	0.280419	2.0017
APOL1	YPL087W	32	1.9241	2.79464	0.295461	1.96893
APOL1	YBR046C	56	3.36718	2.65607	0.262324	1.95932
APOL1	YHL012W	32	1.9241	2.81099	0.319805	1.91202
APOL1	YBR246W	46	2.76589	2.51817	0.289308	1.78965
APOL1	YJL045W	48	2.88615	2.63178	0.323918	1.7793
APOL1	YDR010C	111	6.67422	2.37497	0.277594	1.71569
APOL1	YHR097C	24	1.44308	2.83639	0.39743	1.70913
APOL1	YMR191W	68	4.08871	2.37828	0.282079	1.70742
APOL1	YHR078W	205	12.3263	2.14621	0.20846	1.69881
APOL1	YOR087W	26	1.56333	2.55588	0.335457	1.69849
APOL1	YOR375C	28	1.68359	2.53227	0.335295	1.68322
APOL1	YPL191C	24	1.44308	2.81144	0.410536	1.65725
APOL1	YDR143C	112	6.73435	2.13896	0.229906	1.6472
APOL1	YHR106W	45	2.70577	2.31044	0.290277	1.63977
APOL1	YIL122W	11	0.66141	3.0539	0.477558	1.59549
APOL1	YMR233W	47	2.82602	2.46854	0.368097	1.55988
APOL1	YDL053C	26	1.56333	2.44222	0.370483	1.53742
APOL1	YMR215W	14	0.841794	2.69567	0.437841	1.51539
APOL1	YMR173W-A	47	2.82602	2.32981	0.359749	1.49166
APOL1	YJL077C	108	6.49384	2.13965	0.306986	1.48281
APOL1	YLL039C	22	1.32282	2.33607	0.368142	1.47607
APOL1	YJL083W	71	4.2691	2.09914	0.298011	1.47357
APOL1	YPL182C	32	1.9241	2.23952	0.345079	1.46671
APOL1	YBR063C	30	1.80384	2.29938	0.375736	1.43542
APOL1	YDR151C	49	2.94628	2.21087	0.351912	1.43284
APOL1	YPL138C	32	1.9241	2.19941	0.351271	1.42682
APOL1	YDR102C	39	2.345	2.22946	0.362549	1.42117
APOL1	YML051W	83	4.99064	2.05873	0.320475	1.39896
APOL1	YDR086C	15	0.901922	2.36514	0.40969	1.39616
APOL1	YMR199W	31	1.86397	2.17361	0.363853	1.38273
APOL1	YJL186W	29	1.74372	2.15024	0.359835	1.37651
APOL1	YER056C	116	6.97487	1.88755	0.271741	1.37463
APOL1	YLR001C	34	2.04436	2.1141	0.352865	1.36811
APOL1	YBL024W	81	4.87038	1.97214	0.308438	1.36386
APOL1	YHR132C	25	1.5032	2.43823	0.444317	1.35488
APOL1	YJR147W	150	9.01922	1.77474	0.237695	1.35289
APOL1	YJL082W	55	3.30705	2.03526	0.340843	1.34156
APOL1	YDL241W	62	3.72795	1.99495	0.328526	1.33955
APOL1	YOR378W	51	3.06654	2.07614	0.357093	1.33477
APOL1	YHR202W	26	1.56333	2.21884	0.40424	1.3219
APOL1	YJL084C	72	4.32923	2.13768	0.388875	1.30639
APOL1	YJL053W	27	1.62346	2.1101	0.382531	1.30292
APOL1	YJR134C	73	4.38935	1.77826	0.26799	1.3017
APOL1	YOR326W	11	0.66141	2.56781	0.504985	1.27111
APOL1	YOL062C	37	2.22474	1.98107	0.360005	1.26787
APOL1	YJL078C	77	4.62987	1.81998	0.304896	1.26507
APOL1	YBL088C	21	1.26269	2.14905	0.421297	1.24366
APOL1	YJR020W	70	4.20897	1.93783	0.362748	1.23488
APOL1	YMR275C	40	2.40513	1.92035	0.368243	1.2132
APOL1	YOR202W	21	1.26269	2.10776	0.429779	1.20189
APOL1	YDR157W	47	2.82602	1.98317	0.39444	1.20093
APOL1	YOR153W	15	0.901922	2.09986	0.434038	1.18844
APOL1	YLR104W	26	1.56333	1.99403	0.409778	1.17692
APOL1	YDL236W	109	6.55397	1.68214	0.312261	1.15687
APOL1	YOR191W	12	0.721538	2.47377	0.53388	1.15308
APOL1	YDL046W	32	1.9241	1.85604	0.380307	1.15018
APOL1	YMR193C-A	34	2.04436	1.92372	0.408448	1.13798
APOL1	YLR087C	22	1.32282	2.05569	0.451156	1.12825
APOL1	YHR035W	127	7.63627	1.73452	0.354132	1.12027
APOL1	YMR020W	77	4.62987	1.75187	0.360736	1.11991
APOL1	YML050W	49	2.94628	1.84062	0.40137	1.10185
APOL1	YIL105C	55	3.30705	1.87111	0.412551	1.09918
APOL1	YDL210W	52	3.12666	1.6487	0.334071	1.09792
APOL1	YML009c	276	16.5954	1.53452	0.285536	1.09636
APOL1	YJL138C	23	1.38295	1.85086	0.411977	1.08835
APOL1	YDL018C	27	1.62346	1.9707	0.449043	1.08577
APOL1	YHR146W	23	1.38295	1.80659	0.401474	1.08129
APOL1	YOR047C	44	2.64564	1.78754	0.395817	1.08
APOL1	YER153C	29	1.74372	1.94231	0.450854	1.06661
APOL1	YDL223C	112	6.73435	1.50199	0.293748	1.06078
APOL1	YML115C	39	2.345	1.81035	0.414841	1.05934
APOL1	YDR033W	78	4.69	1.65903	0.367792	1.04885
APOL1	YML031W	54	3.24692	1.75126	0.401531	1.04808
APOL1	YMR204C	30	1.80384	1.81851	0.425554	1.04464
APOL1	YML082W	51	3.06654	1.86527	0.447475	1.03061
APOL1	YDR123C	49	2.94628	1.7451	0.416172	1.01884
APOL1	YJL073W	190	11.4243	1.40501	0.275507	1.01792
APOL1	YMR315W	60	3.60769	1.77705	0.427223	1.01785
APOL1	YOR067C	23	1.38295	2.05081	0.503821	1.01757
APOL1	YDL161W	121	7.27551	1.28997	0.212835	1.01542
APOL1	YPL058C	16	0.96205	2.04521	0.50957	1.00303
APOL1	YDR057W	34	2.04436	1.79065	0.442206	0.998816
APOL1	YIL088C	81	4.87038	1.39927	0.290063	0.993394
APOL1	YJL126W	23	1.38295	1.66495	0.405259	0.990215
APOL1	YHL019C	18	1.08231	1.82856	0.460793	0.985971
APOL1	YIL024C	19	1.14243	1.87762	0.475411	0.98498
APOL1	YBR178W	25	1.5032	1.67687	0.414179	0.982343
APOL1	YJR004C	96	5.7723	1.52921	0.370432	0.962743
APOL1	YAL002W	11	0.66141	2.1216	0.547139	0.960788
APOL1	YDL021W	12	0.721538	2.00418	0.524228	0.953535
APOL1	YOR233W	95	5.71217	1.31957	0.277452	0.953454
APOL1	YLR013W	48	2.88615	1.54465	0.386303	0.947947
APOL1	YDR130C	35	2.10449	1.85189	0.490454	0.943622
APOL1	YDL099W	19	1.14243	1.82156	0.49882	0.912926
APOL1	YDR183W	15	0.901922	1.74568	0.485383	0.898357
APOL1	YOR273C	300	18.0384	1.20864	0.259015	0.895587
APOL1	YIL007C	47	2.82602	1.43048	0.37779	0.890061
APOL1	YER049W	22	1.32282	1.85005	0.519052	0.88978
APOL1	YNL236W	9	0.541153	2.52272	0.648951	0.8856
APOL1	YER062C	19	1.14243	1.7985	0.507673	0.88545
APOL1	YHR076W	24	1.44308	1.54161	0.426862	0.883555
APOL1	YDR014W	22	1.32282	1.90475	0.537634	0.88069
APOL1	YDR008C	37	2.22474	1.52287	0.422842	0.878936
APOL1	YIL060W	11	0.66141	2.09248	0.581721	0.875242
APOL1	YML123C	42	2.52538	1.54797	0.434772	0.874958
APOL1	YLR420W	12	0.721538	1.96761	0.555925	0.873766
APOL1	YER098W	65	3.90833	1.54105	0.433903	0.872384
APOL1	YNL205C	11	0.66141	2.1506	0.594364	0.87236
APOL1	YCR004C	35	2.10449	1.73481	0.498064	0.870766
APOL1	YNL070W	24	1.44308	1.72758	0.504261	0.856429
APOL1	YIR013C	79	4.75012	1.42547	0.402061	0.852343
APOL1	YER066C-A	14	0.841794	1.76857	0.518211	0.85208
APOL1	YHR110W	24	1.44308	1.70843	0.503457	0.848311
APOL1	YOR348C	37	2.22474	1.52304	0.448003	0.840715
APOL1	YHR031C	13	0.781666	1.81379	0.538649	0.836793
APOL1	YEL068C	41	2.46525	1.58078	0.473443	0.83237
APOL1	YNL090W	61	3.66782	1.6241	0.490225	0.827926
APOL1	YER160C-A	8	0.481025	2.1887	0.623866	0.823245
APOL1	YLR018C	506	30.4248	1.02155	0.194635	0.822725
APOL1	YJR059W	19	1.14243	1.68997	0.516786	0.816616
APOL1	YJR109C	105	6.31346	1.29587	0.370198	0.816142
APOL1	YDR204W	11	0.66141	1.75928	0.539476	0.810191
APOL1	YMR319C	43	2.58551	1.38612	0.416816	0.808364
APOL1	YLR041W	98	5.89256	1.3968	0.423115	0.805796
APOL1	YMR194W	17	1.02218	1.92494	0.582011	0.804606
APOL1	YBR259W	34	2.04436	1.50282	0.466389	0.80192
APOL1	YHL043W	51	3.06654	1.4796	0.459984	0.799009
APOL1	YJR131W	42	2.52538	1.24407	0.358166	0.798488
APOL1	YNL326C	276	16.5954	1.08616	0.265092	0.798228
APOL1	YMR306C-A	51	3.06654	1.42792	0.443814	0.79419
APOL1	YIL159W	28	1.68359	1.61635	0.509093	0.793478
APOL1	YBR083W	20	1.20256	1.75513	0.553138	0.784301
APOL1	YAR040C	73	4.38935	1.29429	0.399169	0.777649
APOL1	YDR185C	29	1.74372	1.50673	0.484602	0.776567
APOL1	YNL253W	34	2.04436	1.48708	0.478214	0.775937
APOL1	YBR195C	6	0.360769	2.22832	0.651815	0.775866
APOL1	YJR146W	3479	209.186	0.936105	0.176346	0.771027
APOL1	YJL052W	19	1.14243	1.5503	0.503309	0.770019
APOL1	YJR154W	51	3.06654	1.28879	0.403101	0.769275
APOL1	YIL110W	32	1.9241	1.57765	0.513358	0.767749
APOL1	YMR189W	18	1.08231	1.76134	0.565418	0.765447
APOL1	YML001W	18	1.08231	1.48562	0.488384	0.760066
APOL1	YLR053C	13	0.781666	1.66577	0.548938	0.751364
APOL1	YCL047C	13	0.781666	1.78757	0.580478	0.749926
APOL1	YIL161W	65	3.90833	1.47093	0.491045	0.748637
APOL1	YMR276W	102	6.13307	1.31738	0.434979	0.744349
APOL1	YMR022W	50	3.00641	1.41839	0.476545	0.742462
APOL1	YJL030W	92	5.53179	1.32387	0.442357	0.738246
APOL1	YJR150C	77	4.62987	1.269	0.420602	0.735255
APOL1	YIL108W	42	2.52538	1.39229	0.47391	0.732468
APOL1	YOR359W	14	0.841794	1.56044	0.532507	0.729498
APOL1	YER060W	36	2.16461	1.34368	0.4571	0.729485
APOL1	YMR180C	71	4.2691	1.32515	0.458169	0.718007
APOL1	YMR147W	111	6.67422	1.29371	0.462101	0.695883
APOL1	YLR114C	12	0.721538	1.67709	0.585308	0.695476
APOL1	YLR142W	16	0.96205	1.73908	0.600259	0.695181
APOL1	YDL233W	729	43.8334	0.973205	0.286101	0.69477
APOL1	YMR313C	26	1.56333	1.36469	0.491729	0.693634
APOL1	YBR013C	41	2.46525	1.41536	0.513478	0.688605
APOL1	YMR221C	25	1.5032	1.50317	0.547879	0.679613
APOL1	YOR309C	9	0.541153	1.71764	0.607092	0.674875
APOL1	YOR100C	20	1.20256	1.56962	0.573142	0.670004
APOL1	YDR169C	31	1.86397	1.52755	0.561436	0.66993
APOL1	YHL032C	16	0.96205	1.78161	0.626458	0.665505
APOL1	YDR153C	1197	71.9734	0.924651	0.280774	0.665033
APOL1	YNL058C	30	1.80384	1.47033	0.548917	0.663239
APOL1	YBR069C	37	2.22474	1.22149	0.459186	0.660597
APOL1	YPL136W	36	2.16461	1.24079	0.469228	0.658578
APOL1	YPL245W	24	1.44308	1.43051	0.540393	0.657472
APOL1	YBR227C	27	1.62346	1.28329	0.488962	0.655808
APOL1	YML116W	52	3.12666	1.33978	0.511864	0.653996
APOL1	YDL237W	74	4.44948	1.38157	0.526898	0.653622
APOL1	YER040W	113	6.79448	1.0749	0.392923	0.652545
APOL1	YOR076C	10	0.601281	1.87312	0.652093	0.65167
APOL1	YJR060W	8	0.481025	1.64935	0.606291	0.649362
APOL1	YOR069W	16	0.96205	1.56064	0.584889	0.647841
APOL1	YCL069W	25	1.5032	1.54584	0.581909	0.646301
APOL1	YPL039W	28	1.68359	1.52084	0.576844	0.643553
APOL1	YDR333C	8	0.481025	1.98005	0.68184	0.629974
APOL1	YBR008C	26	1.56333	1.32316	0.526531	0.626475
APOL1	YMR133W	40	2.40513	1.20296	0.48149	0.623745
APOL1	YEL023C	19	1.14243	1.39732	0.555202	0.621525
APOL1	YOR381W	56	3.36718	1.17726	0.472365	0.621163
APOL1	YAL026C	6	0.360769	1.952	0.684186	0.616468
APOL1	YJR106W	240	14.4308	0.915431	0.333068	0.61053
APOL1	YCL028W	14	0.841794	1.7385	0.651073	0.606607
APOL1	YAR037W	28	1.68359	1.73446	0.650289	0.606559
APOL1	YOR085W	16	0.96205	1.45819	0.585258	0.60477
APOL1	YCL056C	18	1.08231	1.68499	0.642492	0.602396
APOL1	YBL064C	25	1.5032	1.66017	0.638474	0.600195
APOL1	YMR259C	56	3.36718	1.17898	0.492186	0.598701
APOL1	YDL138W	282	16.9561	0.794596	0.250032	0.595922
APOL1	YCL036W	21	1.26269	1.37635	0.571726	0.589453
APOL1	YOL071W	33	1.98423	1.18051	0.50119	0.588848
APOL1	YDR043C	73	4.38935	0.964044	0.390709	0.587384
APOL1	YML095C	35	2.10449	1.1169	0.475459	0.58586
APOL1	YDR154C	16	0.96205	1.38913	0.582256	0.580301
APOL1	YBR226C	43	2.58551	1.16371	0.502109	0.579402
APOL1	YJR015W	203	12.206	0.865707	0.334065	0.576505
APOL1	YDL242W	98	5.89256	1.18249	0.514252	0.574393
APOL1	YNL093W	54	3.24692	1.12177	0.490747	0.571266
APOL1	YOR197W	23	1.38295	1.39773	0.592451	0.569645
APOL1	YDR056C	33	1.98423	1.26601	0.552015	0.567153
APOL1	YJR036C	18	1.08231	1.34358	0.582372	0.561116
APOL1	YDR120C	11	0.66141	1.49516	0.624823	0.560948
APOL1	YPL107W	49	2.94628	1.25833	0.557962	0.556231
APOL1	YBR051W	33	1.98423	1.28045	0.566503	0.555073
APOL1	YHR048W	7	0.420897	1.69057	0.67359	0.551818
APOL1	YPL132W	25	1.5032	1.31696	0.582291	0.550108
APOL1	YOR385W	24	1.44308	1.39202	0.605182	0.549597
APOL1	YOR011W	61	3.66782	1.12253	0.514687	0.544777
APOL1	YER157W	24	1.44308	1.10406	0.513421	0.537212
APOL1	YMR265C	58	3.48743	1.28134	0.580817	0.537117
APOL1	YPL088W	11	0.66141	1.52903	0.649032	0.536641
APOL1	YNL187W	11	0.66141	1.59247	0.66502	0.533447
APOL1	YAL042W	19	1.14243	1.33765	0.602902	0.531176
APOL1	YJR061W	45	2.70577	1.1307	0.530417	0.530959
APOL1	YDL234C	16	0.96205	1.29271	0.593518	0.525465
APOL1	YEL067C	71	4.2691	0.91104	0.423941	0.524813
APOL1	YOR379C	35	2.10449	1.19282	0.566191	0.517456
APOL1	YMR135C	73	4.38935	1.04456	0.506843	0.515134
APOL1	YML012W	21	1.26269	1.27795	0.596984	0.515033
APOL1	YBR249C	20	1.20256	1.32281	0.613608	0.511121
APOL1	YMR183C	15	0.901922	1.3097	0.61435	0.505087
APOL1	YJL107C	61	3.66782	1.20177	0.581485	0.502961
APOL1	YDL157C	91	5.47166	1.18662	0.577035	0.501901
APOL1	YDL180W	92	5.53179	0.756203	0.33973	0.499298
APOL1	YJL212C	34	2.04436	1.16161	0.570972	0.498362
APOL1	YIL042C	16	0.96205	1.32612	0.625	0.497297
APOL1	YLL012W	46	2.76589	1.25975	0.606313	0.495945
APOL1	YJR092W	86	5.17102	1.06201	0.535104	0.493726
APOL1	YDR048C	20	1.20256	1.26741	0.610673	0.493436
APOL1	YMR232W	33	1.98423	1.13953	0.567506	0.49284
APOL1	YOL036W	35	2.10449	1.05379	0.53337	0.491729
APOL1	YPL179W	65	3.90833	1.09015	0.550379	0.490155
APOL1	YNL098C	20	1.20256	1.32044	0.629364	0.489405
APOL1	YBR172C	173	10.4022	0.780124	0.376213	0.486631
APOL1	YOL075C	14	0.841794	1.18523	0.59186	0.48374
APOL1	YBR161W	16	0.96205	1.3759	0.649023	0.48291
APOL1	YDL036C	22	1.32282	1.34255	0.646291	0.474873
APOL1	YNL211C	21	1.26269	1.25208	0.623171	0.47182
APOL1	YEL038W	33	1.98423	1.08674	0.568336	0.469104
APOL1	YOR214C	36	2.16461	1.18796	0.606058	0.467989
APOL1	YJL181W	30	1.80384	1.29696	0.640041	0.46685
APOL1	YNL130C	48	2.88615	0.949333	0.508357	0.466733
APOL1	YDR078C	14	0.841794	1.26538	0.6352	0.461613
APOL1	YMR151W	14	0.841794	1.22806	0.627126	0.457912
APOL1	YDR194C	8	0.481025	1.42411	0.679389	0.456587
APOL1	YOR151C	21	1.26269	1.09065	0.584668	0.45298
APOL1	YNL063W	171	10.2819	0.791489	0.430136	0.451041
APOL1	YIL015C-A	7	0.420897	1.62044	0.721843	0.450736
APOL1	YML107C	40	2.40513	1.40301	0.678976	0.450401
APOL1	YDL200C	29	1.74372	1.04411	0.570709	0.448227
APOL1	YLR451W	9	0.541153	1.43957	0.692066	0.443292
APOL1	YNL322C	118	7.09512	0.942055	0.530598	0.442203
APOL1	YMR015C	15	0.901922	1.4439	0.694024	0.441798
APOL1	YPL201C	29	1.74372	1.05251	0.584123	0.437713
APOL1	YOR072W	30	1.80384	1.10178	0.606036	0.43406
APOL1	YHR153C	20	1.20256	1.1619	0.626521	0.433945
APOL1	YBR148W	36	2.16461	1.13869	0.61988	0.43284
APOL1	YOL050C	13	0.781666	1.45548	0.704237	0.430475
APOL1	YLR092W	16	0.96205	1.42605	0.700337	0.427334
APOL1	YOR340C	18	1.08231	0.973345	0.563334	0.425026
APOL1	YML100W	19	1.14243	0.997275	0.580933	0.417925
APOL1	YBR100W	32	1.9241	1.13815	0.637477	0.412605
APOL1	YOR333C	54	3.24692	1.13876	0.641312	0.408459
APOL1	YJR153W	74	4.44948	0.938685	0.566503	0.406917
APOL1	YDL059C	13	0.781666	1.34286	0.699399	0.403665
APOL1	YBR255W	17	1.02218	1.22297	0.672277	0.400796
APOL1	YBL070C	22	1.32282	1.16187	0.655422	0.400354
APOL1	YNL183C	605	36.3775	0.594248	0.326778	0.400061
APOL1	YDL130W	29	1.74372	0.919041	0.566487	0.398416
APOL1	YBR177C	11	0.66141	1.19093	0.668918	0.394297
APOL1	YJR126C	25	1.5032	1.34882	0.708647	0.392983
APOL1	YDR007W	50	3.00641	0.807906	0.514617	0.392144
APOL1	YOR263C	25	1.5032	1.14011	0.65673	0.391365
APOL1	YDL121C	55	3.30705	0.996677	0.607978	0.390719
APOL1	YLL024C	23	1.38295	0.959025	0.594382	0.388998
APOL1	YNL083W	48	2.88615	0.805306	0.518361	0.387866
APOL1	YJL038C	107	6.43371	0.857228	0.550177	0.385601
APOL1	YPL164C	25	1.5032	0.97659	0.608387	0.382445
APOL1	YER073W	52	3.12666	0.999584	0.62468	0.375164
APOL1	YJR008W	28	1.68359	0.916125	0.591883	0.373886
APOL1	YDR146C	31	1.86397	1.10532	0.666774	0.36832
APOL1	YOR133W	14	0.841794	1.02633	0.646831	0.362469
APOL1	YLR063W	8	0.481025	1.42958	0.749488	0.358125
APOL1	YOL027C	16	0.96205	1.19676	0.702375	0.356184
APOL1	YBR075W	21	1.26269	1.14474	0.696548	0.347374
APOL1	YOR007C	130	7.81666	0.773698	0.551486	0.347014
APOL1	YOR286W	17	1.02218	1.20472	0.714365	0.344109
APOL1	YDL240W	37	2.22474	1.04713	0.671726	0.343746
APOL1	YHL037C	7	0.420897	1.52948	0.776725	0.341494
APOL1	YIL156W	50	3.00641	1.16607	0.708623	0.339766
APOL1	YER020W	24	1.44308	0.865295	0.608249	0.33898
APOL1	YLL060C	46	2.76589	0.825714	0.593199	0.335901
APOL1	YDL095W	22	1.32282	0.914139	0.632704	0.33576
APOL1	YDL118W	48	2.88615	0.885714	0.623695	0.333299
APOL1	YMR042W	15	0.901922	1.3198	0.749977	0.329979
APOL1	YBR057C	41	2.46525	1.05799	0.688598	0.32946
APOL1	YMR096W	82	4.93051	0.772467	0.593845	0.313741
APOL1	YBR138C	21	1.26269	1.04344	0.699569	0.313483
APOL1	YEL015W	6	0.360769	1.3284	0.76629	0.310459
APOL1	YIL057C	17	1.02218	1.17741	0.736433	0.310326
APOL1	YBR137W	20	1.20256	1.15498	0.732053	0.309474
APOL1	YOR383C	15	0.901922	0.977051	0.68401	0.308739
APOL1	YIL112W	14	0.841794	1.16375	0.737414	0.305583
APOL1	YJL106W	39	2.345	0.95629	0.681096	0.304965
APOL1	YEL028W	44	2.64564	0.909668	0.665156	0.304597
APOL1	YDL176W	290	17.4372	0.654517	0.53587	0.303781
APOL1	YCR010C	9	0.541153	1.33971	0.773947	0.302846
APOL1	YDR178W	12	0.721538	1.16213	0.740812	0.30121
APOL1	YML028W	14	0.841794	1.02954	0.708041	0.300584
APOL1	YJL012C	33	1.98423	0.874457	0.657958	0.299101
APOL1	YDL077C	31	1.86397	0.819518	0.641436	0.29385
APOL1	YPL119C	154	9.25973	0.818629	0.641122	0.293788
APOL1	YNL074C	185	11.1237	0.710708	0.58752	0.293153
APOL1	YER139C	21	1.26269	1.02708	0.71802	0.289616
APOL1	YDL142C	95	5.71217	0.757891	0.62204	0.286452
APOL1	YDR132C	14	0.841794	1.1704	0.756075	0.285491
APOL1	YIL102C	14	0.841794	0.95417	0.702693	0.283681
APOL1	YIL168W	39	2.345	0.867333	0.673276	0.283379
APOL1	YBR084W	34	2.04436	0.879342	0.679097	0.282184
APOL1	YLR040C	12	0.721538	1.05137	0.73234	0.281409
APOL1	YDR068W	301	18.0986	0.532449	0.474848	0.279616
APOL1	YHR012W	12	0.721538	1.09905	0.747682	0.27731
APOL1	YEL004W	49	2.94628	1.03643	0.733238	0.27648
APOL1	YMR171C	30	1.80384	0.99787	0.723762	0.275649
APOL1	YHL041W	205	12.3263	0.621963	0.557402	0.27528
APOL1	YCR005C	15	0.901922	1.27483	0.784876	0.274246
APOL1	YDL155W	107	6.43371	0.734997	0.63366	0.269259
APOL1	YML007W	29	1.74372	1.07245	0.749102	0.269075
APOL1	YBR206W	47	2.82602	0.859063	0.689149	0.267041
APOL1	YML078W	79	4.75012	0.760741	0.649647	0.266528
APOL1	YOR239W	12	0.721538	0.987323	0.731111	0.26548
APOL1	YDL050C	14	0.841794	1.21469	0.78146	0.265459
APOL1	YDR121W	22	1.32282	1.15156	0.770221	0.264606
APOL1	YMR110C	23	1.38295	1.00049	0.744411	0.255715
APOL1	YML120C	36	2.16461	1.03936	0.756364	0.253225
APOL1	YLL010C	33	1.98423	1.08015	0.76651	0.252204
APOL1	YLR034C	25	1.5032	0.856185	0.706876	0.250969
APOL1	YOL048C	14	0.841794	0.880569	0.718625	0.24777
APOL1	YDL222C	161	9.68063	0.635725	0.612162	0.246559
APOL1	YBR006W	15	0.901922	1.04666	0.765491	0.245451
APOL1	YOL072W	8	0.481025	1.19026	0.794332	0.244799
APOL1	YLR021W	18	1.08231	0.982202	0.750853	0.244713
APOL1	YLR050C	27	1.62346	1.05855	0.77051	0.242926
APOL1	YLR037C	21	1.26269	0.991547	0.757053	0.240893
APOL1	YAL055W	10	0.601281	1.17008	0.797002	0.237524
APOL1	YML117W-A	29	1.74372	1.02096	0.768745	0.236102
APOL1	YER150W	5	0.300641	1.59045	0.852862	0.234015
APOL1	YLR055C	22	1.32282	0.829417	0.717878	0.233997
APOL1	YBL056W	13	0.781666	1.1845	0.802464	0.233981
APOL1	YEL018W	11	0.66141	1.22158	0.810353	0.231668
APOL1	YNL095C	38	2.28487	0.938494	0.753513	0.231326
APOL1	YDL010W	28	1.68359	0.870661	0.736671	0.22927
APOL1	YIL071C	59	3.54756	0.807737	0.719099	0.226894
APOL1	YJL170C	70	4.20897	0.608529	0.631663	0.224143
APOL1	YDR193W	12	0.721538	0.987902	0.775408	0.221875
APOL1	YER119C-A	35	2.10449	0.769459	0.718018	0.216974
APOL1	YBR240C	39	2.345	0.852777	0.74682	0.215906
APOL1	YDL197C	59	3.54756	0.804474	0.732604	0.215113
APOL1	YIL044C	8	0.481025	1.14441	0.81226	0.214851
APOL1	YER176W	16	0.96205	0.78958	0.728509	0.214363
APOL1	YMR251W	52	3.12666	0.944382	0.775779	0.21175
APOL1	YBR134W	11	0.66141	0.819025	0.742062	0.211258
APOL1	YOR130C	124	7.45589	0.720482	0.706872	0.211194
APOL1	YDL172C	43	2.58551	0.640239	0.674043	0.20869
APOL1	YDR316W	6	0.360769	1.52698	0.864213	0.207345
APOL1	YCL013W	10	0.601281	1.11782	0.815891	0.205802
APOL1	YML036W	75	4.50961	0.841755	0.763841	0.198788
APOL1	YDL227C	163	9.80089	0.534859	0.63304	0.196272
APOL1	YMR316C-A	12	0.721538	0.829814	0.767065	0.193293
APOL1	YIL077C	23	1.38295	0.890857	0.783135	0.193195
APOL1	YDR070C	12	0.721538	1.09482	0.831311	0.184684
APOL1	YOR275C	29	1.74372	0.882442	0.790733	0.184666
APOL1	YML014W	6	0.360769	1.47861	0.877344	0.181361
APOL1	YBL053W	12	0.721538	1.16822	0.845219	0.180817
APOL1	YMR153C-A	54	3.24692	0.625897	0.714158	0.178908
APOL1	YPL185W	54	3.24692	0.673712	0.738143	0.176416
APOL1	YHL022C	20	1.20256	1.07683	0.840773	0.17146
APOL1	YMR035W	16	0.96205	1.06326	0.842107	0.167881
APOL1	YLR125W	23	1.38295	0.928328	0.81982	0.167266
APOL1	YIL054W	33	1.98423	0.739283	0.781323	0.161664
APOL1	YDL204W	64	3.8482	0.713204	0.777907	0.158398
APOL1	YJR096W	58	3.48743	0.862977	0.817314	0.157654
APOL1	YPL225W	31	1.86397	0.719264	0.782787	0.156233
APOL1	YLR052W	7	0.420897	1.27389	0.879926	0.152961
APOL1	YPL052W	17	1.02218	0.764262	0.802171	0.151193
APOL1	YML037C	105	6.31346	0.506848	0.70489	0.149576
APOL1	YLR011W	34	2.04436	0.57315	0.744253	0.146581
APOL1	YLR020C	48	2.88615	0.672548	0.783063	0.145901
APOL1	YOR161C	248	14.9118	0.316655	0.5423	0.144933
APOL1	YPL274W	18	1.08231	1.06578	0.866997	0.141751
APOL1	YOL058W	25	1.5032	0.792722	0.82204	0.141073
APOL1	YER096W	62	3.72795	0.886	0.843291	0.138844
APOL1	YEL039C	26	1.56333	0.908223	0.847333	0.138655
APOL1	YNL301C	15	0.901922	0.972833	0.865476	0.130869
APOL1	YOR265W	36	2.16461	0.711502	0.816671	0.130439
APOL1	YNL200C	38	2.28487	0.847685	0.84613	0.130433
APOL1	YLR123C	27	1.62346	0.714864	0.820701	0.128174
APOL1	YDR111C	22	1.32282	0.785933	0.837027	0.128086
APOL1	YDL218W	54	3.24692	1.00562	0.872919	0.127795
APOL1	YPL249C	18	1.08231	1.24324	0.89849	0.1262
APOL1	YNL311C	125	7.51602	0.529603	0.763303	0.125355
APOL1	YNL134C	28	1.68359	0.852592	0.854778	0.123815
APOL1	YHR184W	22	1.32282	0.98862	0.875552	0.123031
APOL1	YOR337W	46	2.76589	0.719517	0.82927	0.122843
APOL1	YPL230W	18	1.08231	0.931496	0.868603	0.122396
APOL1	YHR094C	5	0.300641	1.40347	0.918519	0.114356
APOL1	YDR109C	36	2.16461	0.82018	0.866367	0.109603
APOL1	YOR062C	67	4.02859	0.498526	0.780453	0.10945
APOL1	YHR015W	19	1.14243	1.0252	0.893326	0.109362
APOL1	YMR271C	65	3.90833	0.60891	0.820756	0.109143
APOL1	YML071C	20	1.20256	0.700239	0.844571	0.108838
APOL1	YBL008W	10	0.601281	0.974225	0.888689	0.108442
APOL1	YPL165C	36	2.16461	0.916791	0.883444	0.106857
APOL1	YDR203W	14	0.841794	0.693828	0.848535	0.105091
APOL1	YHR045W	71	4.2691	0.872198	0.879746	0.104885
APOL1	YLR031W	31	1.86397	0.699124	0.854429	0.101772
APOL1	YOR101W	11	0.66141	1.13583	0.911043	0.101041
APOL1	YCL022C	25	1.5032	0.942471	0.892916	0.100924
APOL1	YMR304W	7	0.420897	1.16047	0.913947	0.0998624
APOL1	YDL020C	5	0.300641	1.42305	0.930441	0.098986
APOL1	YJR088C	8	0.481025	1.01765	0.904234	0.0974565
APOL1	YML019W	29	1.74372	0.705984	0.868027	0.093171
APOL1	YLR012C	51	3.06654	0.522634	0.824011	0.0919778
APOL1	YPL240C	19	1.14243	0.744198	0.87772	0.0910004
APOL1	YBR185C	17	1.02218	0.784798	0.885264	0.0900448
APOL1	YLL013C	17	1.02218	0.822992	0.890745	0.0899161
APOL1	YLR154C	11	0.66141	0.815237	0.893399	0.0869049
APOL1	YDL125C	10	0.601281	0.805955	0.894168	0.0852956
APOL1	YJL057C	41	2.46525	0.786534	0.894823	0.0827253
APOL1	YIL041W	10	0.601281	1.00071	0.921889	0.0781662
APOL1	YOR382W	29	1.74372	0.698527	0.896847	0.0720549
APOL1	YDR136C	9	0.541153	0.8659	0.917262	0.0716424
APOL1	YHR140W	15	0.901922	1.04774	0.932578	0.0706411
APOL1	YOR094W	108	6.49384	0.639423	0.891842	0.0691585
APOL1	YOR339C	30	1.80384	0.620972	0.890079	0.0682579
APOL1	YNL275W	32	1.9241	0.778112	0.912345	0.0682054
APOL1	YAL061W	74	4.44948	0.635419	0.897883	0.064887
APOL1	YNL195C	28	1.68359	0.7415	0.912876	0.0646027
APOL1	YEL049W	49	2.94628	0.618469	0.898089	0.0630289
APOL1	YIL146C	48	2.88615	0.590852	0.896753	0.0610039
APOL1	YPL170W	16	0.96205	0.674076	0.910109	0.0605935
APOL1	YAL037W	38	2.28487	0.229192	0.745633	0.0582989
APOL1	YMR230W	11	0.66141	0.788619	0.926616	0.0578722
APOL1	YMR167W	19	1.14243	0.868253	0.933369	0.057853
APOL1	YOR152C	104	6.25333	0.481159	0.884571	0.0555398
APOL1	YML099C	13	0.781666	1.04729	0.950382	0.0519649
APOL1	YJL209W	13	0.781666	0.755264	0.932751	0.0507911
APOL1	YPL033C	16	0.96205	0.735847	0.931795	0.0501884
APOL1	YBR169C	44	2.64564	0.829864	0.940006	0.0497867
APOL1	YJR128W	18	1.08231	0.966461	0.950107	0.0482194
APOL1	YPL025C	11	0.66141	0.781357	0.940872	0.0462
APOL1	YLR024C	106	6.37358	0.475723	0.903283	0.0460103
APOL1	YEL014C	18	1.08231	0.764036	0.945367	0.0417419
APOL1	YOR059C	49	2.94628	0.420568	0.90534	0.0398108
APOL1	YOR231W	29	1.74372	0.58746	0.933127	0.0392854
APOL1	YNL184C	4	0.240513	1.81241	0.979756	0.0366903
APOL1	YDR221W	51	3.06654	0.769798	0.953225	0.0360072
APOL1	YDL239C	34	2.04436	0.54733	0.936585	0.0347089
APOL1	YJR102C	10	0.601281	0.843397	0.964441	0.0299901
APOL1	YOR190W	9	0.541153	0.989682	0.971192	0.0285112
APOL1	YOR201C	8	0.481025	1.13899	0.976751	0.0264801
APOL1	YCL009C	13	0.781666	0.811589	0.967377	0.0264766
APOL1	YPL103C	20	1.20256	0.813034	0.969556	0.024752
APOL1	YIL065C	24	1.44308	1.06983	0.97754	0.0240285
APOL1	YHR108W	25	1.5032	0.487817	0.953348	0.0227576
APOL1	YOR277C	6	0.360769	1.19974	0.982503	0.020992
APOL1	YMR036C	8	0.481025	1.31379	0.984373	0.0205313
APOL1	YML113W	17	1.02218	0.524664	0.963213	0.0193006
APOL1	YJR025C	14	0.841794	0.739163	0.982488	0.0129442
APOL1	YJL199C	13	0.781666	0.938519	0.986467	0.0127011
APOL1	YLL042C	34	2.04436	0.595632	0.983069	0.0100849
APOL1	YOR114W	39	2.345	0.372245	0.977779	0.00827184
APOL1	YLR038C	12	0.721538	0.554927	0.992875	0.00395402
APOL1	YAL019W	21	1.26269	0.757815	0.996423	0.00271096
APOL1	YDR022C	58	3.48743	0.654716	0.998286	0.00112213
MTTP	YJR050W	126	17.8849	5.05967	0.0978508	4.56458
MTTP	YMR019W	119	16.8913	5.00435	0.109134	4.4582
MTTP	YAL018C	89	12.633	5.03856	0.118617	4.4409
MTTP	YAL037W	90	12.7749	4.96587	0.122898	4.35557
MTTP	YOR025W	80	11.3555	4.99162	0.128732	4.34904
MTTP	YMR152W	104	14.7621	4.87969	0.119411	4.297
MTTP	YOR367W	56	7.94885	5.02743	0.148767	4.27951
MTTP	YNL202W	75	10.6458	4.94381	0.137624	4.26342
MTTP	YBR261C	83	11.7813	4.90076	0.130876	4.25937
MTTP	YMR172C-A	63	8.94245	4.95763	0.147848	4.22465
MTTP	YMR223W	76	10.7877	4.91555	0.140892	4.22299
MTTP	YNL159C	56	7.94885	4.97961	0.155657	4.2045
MTTP	YNL324W	80	11.3555	4.77417	0.123482	4.18464
MTTP	YOR034C	67	9.51023	4.84533	0.148093	4.12777
MTTP	YOR111W	64	9.0844	4.85985	0.15083	4.12684
MTTP	YJL123C	44	6.24552	4.9353	0.177451	4.05953
MTTP	YPL166W	46	6.52941	4.95254	0.18352	4.04365
MTTP	YMR279C	58	8.23273	4.78461	0.164262	3.99868
MTTP	YJR010W	63	8.94245	4.81569	0.170591	3.99417
MTTP	YAR029W	63	8.94245	4.70562	0.156381	3.96975
MTTP	YJL142C	48	6.8133	4.77726	0.185281	3.89212
MTTP	YOR364W	26	3.69054	4.90612	0.216922	3.84187
MTTP	YOR144C	36	5.10997	4.7503	0.192067	3.83793
MTTP	YLL047W	113	16.0396	4.42489	0.142479	3.79444
MTTP	YBR183W	32	4.5422	4.72344	0.199099	3.783
MTTP	YOR102W	24	3.40665	4.90248	0.237372	3.73877
MTTP	YML029W	63	8.94245	4.50443	0.175809	3.71251
MTTP	YDL189W	99	14.0524	4.40955	0.164501	3.68417
MTTP	YHR095W	37	5.25192	4.62442	0.205611	3.67359
MTTP	YER130C	30	4.25831	4.73286	0.225173	3.66714
MTTP	YAR023C	27	3.83248	4.71381	0.226493	3.64616
MTTP	YIL009W	88	12.491	4.43847	0.180198	3.63867
MTTP	YBL075C	37	5.25192	4.67038	0.223399	3.62702
MTTP	YPL148C	34	4.82609	4.58448	0.211364	3.61549
MTTP	YLR019W	631	89.5665	4.05193	0.108808	3.61105
MTTP	YER002W	29	4.11637	4.62282	0.220828	3.60198
MTTP	YER172C-A	42	5.96163	4.44174	0.193024	3.58438
MTTP	YBR224W	60	8.51662	4.37226	0.182071	3.5762
MTTP	YBR147W	63	8.94245	4.36784	0.18805	3.54647
MTTP	YHR210C	22	3.12276	4.70198	0.247055	3.54033
MTTP	YDR125C	47	6.67135	4.37851	0.19499	3.52474
MTTP	YEL011W	56	7.94885	4.38289	0.20016	3.50561
MTTP	YJL016W	67	9.51023	4.32802	0.201476	3.45603
MTTP	YOR118W	42	5.96163	4.3507	0.210618	3.43436
MTTP	YOR114W	46	6.52941	4.34921	0.21125	3.43044
MTTP	YPL112C	30	4.25831	4.38489	0.243925	3.3153
MTTP	YLR016C	87	12.3491	4.06577	0.19581	3.26965
MTTP	YLR057W	20	2.83887	4.35923	0.256939	3.23917
MTTP	YCL014W	89	12.633	3.97282	0.185792	3.2347
MTTP	YIL138C	36	5.10997	4.1628	0.229914	3.20571
MTTP	YIL010W	62	8.80051	4.1041	0.222186	3.19223
MTTP	YCL075W	81	11.4974	3.91882	0.187883	3.18254
MTTP	YPL116W	37	5.25192	4.15363	0.238295	3.16384
MTTP	YNL219C	64	9.0844	3.96167	0.210742	3.12678
MTTP	YMR283C	23	3.2647	4.31725	0.278037	3.11689
MTTP	YJR152W	96	13.6266	3.90976	0.205284	3.10715
MTTP	YLL053C	50	7.09718	4.15495	0.252466	3.10597
MTTP	YJL118W	45	6.38747	4.22631	0.265822	3.10286
MTTP	YJR014W	54	7.66496	4.03333	0.236785	3.0783
MTTP	YPL150W	18	2.55499	4.29732	0.292026	3.04239
MTTP	YHL039W	43	6.10358	4.04952	0.253234	3.02405
MTTP	YPL147W	31	4.40025	4.16804	0.276617	3.01509
MTTP	YNL273W	14	1.98721	4.50584	0.33353	3.00301
MTTP	YOR347C	38	5.39386	4.06615	0.262378	2.99928
MTTP	YNL175C	15	2.12916	4.23985	0.303315	2.95383
MTTP	YDR233C	23	3.2647	4.09647	0.282813	2.93794
MTTP	YML048W-A	16	2.2711	4.152	0.29274	2.93654
MTTP	YNL083W	42	5.96163	3.83473	0.237343	2.92459
MTTP	YLR094C	22	3.12276	4.27151	0.317053	2.91722
MTTP	YPL221W	12	1.70332	4.42409	0.344308	2.90084
MTTP	YOR040W	41	5.81969	3.85543	0.248239	2.89836
MTTP	YPL022W	16	2.2711	4.26541	0.321423	2.89441
MTTP	YIL020C	23	3.2647	3.96459	0.273145	2.88169
MTTP	YBR233W	24	3.40665	4.09845	0.300199	2.8681
MTTP	YIL135C	60	8.51662	3.76744	0.23911	2.86661
MTTP	YML084W	50	7.09718	3.79702	0.248952	2.85174
MTTP	YDR254W	11	1.56138	4.49234	0.369912	2.83057
MTTP	YCL006C	91	12.9169	3.65688	0.228308	2.82198
MTTP	YOL019W	19	2.69693	4.09361	0.312695	2.81356
MTTP	YPL198W	20	2.83887	4.02837	0.308459	2.78579
MTTP	YDR015C	28	3.97442	3.94272	0.305235	2.73927
MTTP	YPL212C	17	2.41304	3.99503	0.321089	2.71227
MTTP	YOR185C	12	1.70332	4.14878	0.349724	2.69785
MTTP	YDR099W	23	3.2647	3.82789	0.29879	2.68415
MTTP	YOR366W	30	4.25831	3.79395	0.29712	2.66669
MTTP	YJR008W	24	3.40665	3.80503	0.307648	2.63442
MTTP	YPL030W	27	3.83248	3.72982	0.293738	2.63423
MTTP	YMR012W	64	9.0844	3.38372	0.223332	2.62802
MTTP	YER087C-A	27	3.83248	3.71062	0.29212	2.62667
MTTP	YOR062C	55	7.8069	3.42875	0.239354	2.60806
MTTP	YDR134C	44	6.24552	3.39901	0.236442	2.59535
MTTP	YOR316C	50	7.09718	3.41312	0.243634	2.58157
MTTP	YDR112W	60	8.51662	3.43975	0.250983	2.57643
MTTP	YIR003W	254	36.0537	2.99828	0.141736	2.57331
MTTP	YJL017W	20	2.83887	3.7256	0.315075	2.55176
MTTP	YLR122C	36	5.10997	3.55962	0.294318	2.51196
MTTP	YBL090W	11	1.56138	4.0344	0.379749	2.50234
MTTP	YOL037C	15	2.12916	3.98166	0.37233	2.49917
MTTP	YEL002C	23	3.2647	3.64221	0.326741	2.45215
MTTP	YML124C	8	1.13555	4.29361	0.433933	2.43047
MTTP	YDR107C	59	8.37468	3.03919	0.204453	2.41782
MTTP	YDR278C	11	1.56138	3.90473	0.389624	2.38336
MTTP	YHR032W	12	1.70332	4.06187	0.41472	2.37733
MTTP	YOR015W	44	6.24552	3.41267	0.308068	2.36134
MTTP	YER074W	13	1.84527	3.82811	0.383689	2.35931
MTTP	YER038W-A	26	3.69054	3.47197	0.321325	2.35634
MTTP	YLL051C	26	3.69054	3.36451	0.303393	2.34374
MTTP	YPL222W	18	2.55499	3.63452	0.357319	2.33584
MTTP	YPL199C	20	2.83887	3.48333	0.332978	2.32346
MTTP	YDL182W	50	7.09718	3.63059	0.36203	2.31621
MTTP	YML071C	18	2.55499	3.62192	0.360666	2.31561
MTTP	YMR095C	35	4.96803	3.4755	0.337374	2.30296
MTTP	YOL046C	26	3.69054	3.6148	0.365299	2.29432
MTTP	YPL152W	29	4.11637	3.57608	0.35874	2.2932
MTTP	YDR135C	27	3.83248	3.4127	0.330264	2.28561
MTTP	YLR015W	17	2.41304	3.5566	0.366777	2.25212
MTTP	YDL201W	31	4.40025	3.36598	0.339349	2.22373
MTTP	YOR093C	18	2.55499	3.57433	0.382047	2.20877
MTTP	YER185W	30	4.25831	3.29047	0.330168	2.20406
MTTP	YJR115W	42	5.96163	2.74233	0.20194	2.18854
MTTP	YOR374W	11	1.56138	3.74846	0.425397	2.15387
MTTP	YDR253C	12	1.70332	3.59167	0.402643	2.14551
MTTP	YOR180C	26	3.69054	3.2894	0.350114	2.13774
MTTP	YMR115W	15	2.12916	3.47432	0.392317	2.11129
MTTP	YDR297W	10	1.41944	3.73141	0.434693	2.10939
MTTP	YLR082C	27	3.83248	3.29055	0.360604	2.10396
MTTP	YMR154C	73	10.3619	2.76015	0.250081	2.06989
MTTP	YNL183C	356	50.532	2.40891	0.144276	2.06136
MTTP	YBL095W	185	26.2596	2.62759	0.215926	2.06023
MTTP	YDR026C	44	6.24552	2.94141	0.299766	2.05968
MTTP	YMR133W	26	3.69054	3.13058	0.348374	2.03997
MTTP	YDL174C	79	11.2136	2.73763	0.255524	2.0381
MTTP	YNL157W	11	1.56138	3.46097	0.411773	2.03583
MTTP	YDR209C	9	1.27749	3.71138	0.452129	2.03336
MTTP	YER007W	8	1.13555	3.77636	0.462941	2.02813
MTTP	YOR266W	9	1.27749	3.72518	0.456354	2.02518
MTTP	YPL121C	14	1.98721	3.44534	0.414118	2.01856
MTTP	YDR036C	35	4.96803	3.13542	0.356736	2.0169
MTTP	YML095C	24	3.40665	3.0326	0.338795	2.00517
MTTP	YDL135C	22	3.12276	3.21078	0.376632	2.0015
MTTP	YLL049W	9	1.27749	3.69702	0.460352	1.99509
MTTP	YEL017C-A	11	1.56138	3.52387	0.433936	1.99473
MTTP	YLR096W	12	1.70332	3.79209	0.474705	1.99197
MTTP	YCL062W	11	1.56138	3.5594	0.44244	1.98458
MTTP	YPL186C	13	1.84527	3.38266	0.427037	1.93814
MTTP	YNL292W	19	2.69693	3.18222	0.394597	1.92653
MTTP	YML053C	25	3.54859	3.1178	0.384521	1.91894
MTTP	YHR035W	63	8.94245	2.89834	0.348826	1.88733
MTTP	YER088C	12	1.70332	3.27786	0.430606	1.86639
MTTP	YDR057W	19	2.69693	3.24425	0.426862	1.8594
MTTP	YHR151C	12	1.70332	3.32027	0.440665	1.85714
MTTP	YHL005C	15	2.12916	3.11951	0.405923	1.85323
MTTP	YOR382W	21	2.98082	3.05016	0.407353	1.80767
MTTP	YOL047C	25	3.54859	3.01111	0.40059	1.80489
MTTP	YMR170C	38	5.39386	2.65643	0.321943	1.80121
MTTP	YBR059C	12	1.70332	3.37255	0.469336	1.78969
MTTP	YMR206W	22	3.12276	3.2124	0.443296	1.78836
MTTP	YBL085W	16	2.2711	2.95179	0.399257	1.77326
MTTP	YIR002C	20	2.83887	3.11928	0.436079	1.75903
MTTP	YPL232W	12	1.70332	3.15896	0.446133	1.74965
MTTP	YDR034C	12	1.70332	3.07821	0.432748	1.74612
MTTP	YDL070W	9	1.27749	3.32499	0.476714	1.73992
MTTP	YJL158C	18	2.55499	2.90585	0.40145	1.7393
MTTP	YOR341W	9	1.27749	3.17274	0.454455	1.73087
MTTP	YHR193C	10	1.41944	3.19954	0.461068	1.72434
MTTP	YMR141C	37	5.25192	2.66287	0.354897	1.71783
MTTP	YDR020C	12	1.70332	3.17518	0.46039	1.71336
MTTP	YML082W	26	3.69054	3.05932	0.455413	1.66606
MTTP	YBR150C	17	2.41304	2.93074	0.438632	1.64522
MTTP	YDR119W	34	4.82609	2.78295	0.411963	1.63648
MTTP	YBL060W	68	9.65217	2.42389	0.325439	1.63506
MTTP	YJL124C	8	1.13555	3.27334	0.500601	1.6347
MTTP	YNL259C	16	2.2711	2.96731	0.459495	1.60385
MTTP	YML118W	10	1.41944	3.1719	0.495589	1.59994
MTTP	YBL067C	23	3.2647	2.86808	0.446047	1.58878
MTTP	YHR171W	13	1.84527	3.09262	0.486737	1.58733
MTTP	YHR051W	8	1.13555	3.11717	0.493294	1.57949
MTTP	YDR260C	6	0.851662	3.63173	0.575488	1.54171
MTTP	YCL050C	18	2.55499	2.81225	0.45201	1.54108
MTTP	YAL042W	12	1.70332	3.03841	0.492909	1.54075
MTTP	YBR104W	13	1.84527	3.02607	0.492513	1.53569
MTTP	YNL140C	30	4.25831	2.43566	0.369615	1.5354
MTTP	YJL044C	28	3.97442	2.53478	0.394653	1.53442
MTTP	YLR209C	19	2.69693	2.67281	0.426551	1.53272
MTTP	YJR025C	11	1.56138	3.02424	0.496341	1.52319
MTTP	YPL041C	11	1.56138	2.88842	0.491025	1.47014
MTTP	YIR001C	46	6.52941	2.77845	0.474175	1.46098
MTTP	YNL176C	15	2.12916	2.87117	0.491664	1.45952
MTTP	YJR049C	23	3.2647	2.49981	0.420079	1.44969
MTTP	YIL100W	14	1.98721	2.73936	0.471679	1.44726
MTTP	YDL128W	6	0.851662	3.13235	0.542853	1.43194
MTTP	YMR264W	25	3.54859	2.50351	0.433956	1.41709
MTTP	YNL332W	11	1.56138	2.79456	0.496811	1.40619
MTTP	YHR087W	10	1.41944	2.80262	0.500001	1.40131
MTTP	YCL024W	8	1.13555	2.97497	0.534848	1.38381
MTTP	YML059C	20	2.83887	2.5007	0.447846	1.38077
MTTP	YLR152C	19	2.69693	2.5404	0.458208	1.37637
MTTP	YDR286C	9	1.27749	2.6557	0.48631	1.3642
MTTP	YDL187C	48	6.8133	2.32523	0.414047	1.36247
MTTP	YBL001C	12	1.70332	2.90307	0.531661	1.35962
MTTP	YML074C	19	2.69693	2.26691	0.404159	1.35072
MTTP	YIL074C	75	10.6458	2.32348	0.419658	1.34842
MTTP	YJR117W	352	49.9642	1.82678	0.263077	1.3462
MTTP	YDR029W	34	4.82609	2.09766	0.359503	1.34354
MTTP	YLR194C	10	1.41944	2.74295	0.510319	1.34317
MTTP	YOR033C	8	1.13555	2.99469	0.552916	1.33888
MTTP	YDR203W	11	1.56138	2.54262	0.477854	1.32762
MTTP	YIL164C	39	5.5358	2.38949	0.444463	1.32745
MTTP	YOR321W	23	3.2647	2.57269	0.489291	1.3139
MTTP	YOR296W	18	2.55499	2.75693	0.525337	1.30861
MTTP	YBR119W	13	1.84527	2.53653	0.484155	1.30846
MTTP	YMR020W	36	5.10997	2.31812	0.436096	1.3072
MTTP	YDL179W	45	6.38747	2.23613	0.420268	1.29635
MTTP	YOR324C	41	5.81969	1.88743	0.314617	1.29361
MTTP	YAL058W	12	1.70332	2.714	0.525688	1.28728
MTTP	YNL326C	133	18.8785	1.73177	0.269644	1.26481
MTTP	YER037W	8	1.13555	2.65225	0.525493	1.25851
MTTP	YJL198W	6	0.851662	3.27513	0.616979	1.25445
MTTP	YPL115C	10	1.41944	2.75897	0.546203	1.25201
MTTP	YMR201C	10	1.41944	2.76966	0.559219	1.22081
MTTP	YJR079W	7	0.993606	3.05111	0.602066	1.21414
MTTP	YIL095W	17	2.41304	2.33651	0.481057	1.21252
MTTP	YBR148W	20	2.83887	2.43751	0.504366	1.20811
MTTP	YPL167C	32	4.5422	2.26534	0.473101	1.19361
MTTP	YJR048W	11	1.56138	2.56896	0.53939	1.18329
MTTP	YLR170C	10	1.41944	2.4957	0.525951	1.18308
MTTP	YIL073C	112	15.8977	1.71377	0.321018	1.16362
MTTP	YMR184W	20	2.83887	2.42532	0.521516	1.16048
MTTP	YJR051W	33	4.68414	2.20474	0.476101	1.15506
MTTP	YBL044W	6	0.851662	3.16379	0.640738	1.13663
MTTP	YHR123W	12	1.70332	2.39757	0.526718	1.13473
MTTP	YHR204W	4	0.567775	3.44585	0.671928	1.13049
MTTP	YMR247C	22	3.12276	2.2293	0.494983	1.12583
MTTP	YDL177C	59	8.37468	1.90538	0.410429	1.12335
MTTP	YLL056C	14	1.98721	2.58559	0.568635	1.11533
MTTP	YLR058C	25	3.54859	2.1065	0.471514	1.11326
MTTP	YOR094W	57	8.09079	2.06776	0.467121	1.10187
MTTP	YMR104C	20	2.83887	2.48119	0.556601	1.10016
MTTP	YDR151C	21	2.98082	2.27386	0.524796	1.08055
MTTP	YLL063C	9	1.27749	2.71538	0.604771	1.0732
MTTP	YBR206W	26	3.69054	2.07888	0.494289	1.05131
MTTP	YPR004C	13	1.84527	2.07337	0.494662	1.04775
MTTP	YMR221C	13	1.84527	2.42674	0.572402	1.03767
MTTP	YBL091C	14	1.98721	2.22968	0.535164	1.03643
MTTP	YBR028C	7	0.993606	2.68628	0.616824	1.02932
MTTP	YBL099W	6	0.851662	2.73193	0.623504	1.02856
MTTP	YDR193W	8	1.13555	2.48987	0.58724	1.02772
MTTP	YOR065W	15	2.12916	2.15602	0.528064	1.0175
MTTP	YNL242W	31	4.40025	1.95256	0.479244	1.01681
MTTP	YCL076W	18	2.55499	2.25166	0.548449	1.01674
MTTP	YLL013C	11	1.56138	2.39095	0.575382	1.01524
MTTP	YML068W	16	2.2711	2.11672	0.520883	1.01416
MTTP	YDL071C	6	0.851662	2.62608	0.616706	1.00656
MTTP	YEL016C	29	4.11637	1.82889	0.452751	1.00086
MTTP	YNL217W	6	0.851662	2.50285	0.600198	1.00064
MTTP	YJR056C	21	2.98082	1.98713	0.4981	0.997341
MTTP	YLR081W	18	2.55499	2.07779	0.521749	0.993704
MTTP	YNL145W	35	4.96803	1.99469	0.507168	0.98305
MTTP	YDL142C	49	6.95524	1.73908	0.454274	0.949063
MTTP	YLR059C	17	2.41304	2.07537	0.543888	0.946601
MTTP	YDL184C	60	8.51662	2.16059	0.56467	0.940568
MTTP	YER048C	14	1.98721	2.49321	0.623948	0.937576
MTTP	YHR114W	7	0.993606	2.49048	0.625209	0.933409
MTTP	YDR223W	17	2.41304	2.16926	0.571518	0.929487
MTTP	YPL129W	5	0.709718	2.80771	0.66897	0.929437
MTTP	YBR100W	17	2.41304	2.16426	0.570809	0.92888
MTTP	YNL196C	9	1.27749	2.35223	0.60577	0.92732
MTTP	YNL129W	31	4.40025	2.03545	0.545855	0.924391
MTTP	YOR345C	19	2.69693	2.07879	0.559795	0.915093
MTTP	YOL048C	9	1.27749	2.0859	0.567524	0.902101
MTTP	YEL063C	11	1.56138	2.32485	0.614047	0.897286
MTTP	YDR277C	5	0.709718	2.98137	0.702927	0.885686
MTTP	YDR097C	16	2.2711	2.09216	0.582381	0.873727
MTTP	YEL061C	4	0.567775	2.7651	0.684439	0.872555
MTTP	YOR186W	4	0.567775	3.13131	0.722019	0.870445
MTTP	YMR316C-A	8	1.13555	2.07592	0.584601	0.862334
MTTP	YBR220C	22	3.12276	1.98525	0.568717	0.856205
MTTP	YOR222W	14	1.98721	1.97398	0.57087	0.847095
MTTP	YBR099C	5	0.709718	2.90607	0.71055	0.841163
MTTP	YIL115C	6	0.851662	2.58356	0.67634	0.836195
MTTP	YOL002C	9	1.27749	2.126	0.607049	0.835412
MTTP	YPL226W	349	49.5383	1.18465	0.2979	0.831744
MTTP	YDR018C	34	4.82609	1.84805	0.561003	0.811289
MTTP	YDR001C	20	2.83887	2.11304	0.6184	0.806336
MTTP	YPL032C	19	2.69693	1.97812	0.592602	0.805883
MTTP	YCR019W	23	3.2647	1.67817	0.520718	0.804316
MTTP	YDL088C	9	1.27749	2.23352	0.641623	0.800442
MTTP	YJL024C	6	0.851662	2.43349	0.67363	0.794218
MTTP	YNL071W	13	1.84527	2.12167	0.627909	0.789455
MTTP	YJL099W	19	2.69693	1.78411	0.561222	0.782827
MTTP	YOR343C	41	5.81969	1.58915	0.51875	0.764776
MTTP	YPL033C	10	1.41944	2.01831	0.6267	0.753435
MTTP	YIL112W	8	1.13555	2.26767	0.668581	0.751547
MTTP	YNL155W	15	2.12916	1.89842	0.611607	0.737332
MTTP	YOR351C	8	1.13555	2.28557	0.677725	0.736584
MTTP	YBL047C	4	0.567775	2.53589	0.712264	0.729668
MTTP	YLL007C	58	8.23273	1.16554	0.374682	0.728836
MTTP	YLR084C	9	1.27749	2.16882	0.664544	0.727541
MTTP	YAR003W	6	0.851662	2.2328	0.675649	0.724211
MTTP	YOR139C	15	2.12916	1.74571	0.586508	0.721838
MTTP	YOR263C	13	1.84527	1.97913	0.637773	0.716895
MTTP	YML058C-A	12	1.70332	1.81271	0.605009	0.716002
MTTP	YHR127W	15	2.12916	1.80341	0.603264	0.715479
MTTP	YJR030C	12	1.70332	2.16802	0.670437	0.714499
MTTP	YHL027W	20	2.83887	1.74005	0.60041	0.695306
MTTP	YCL005W	7	0.993606	2.22592	0.688206	0.694029
MTTP	YJL064W	30	4.25831	1.60137	0.567024	0.693353
MTTP	YJL210W	13	1.84527	1.94655	0.643945	0.693081
MTTP	YMR246W	10	1.41944	1.94578	0.645562	0.689656
MTTP	YCL069W	12	1.70332	2.13616	0.682757	0.67768
MTTP	YLR012C	28	3.97442	1.41609	0.525447	0.672012
MTTP	YEL056W	15	2.12916	1.84131	0.635827	0.670557
MTTP	YAR014C	7	0.993606	2.17984	0.695208	0.664396
MTTP	YER046W	36	5.10997	1.90675	0.654033	0.659675
MTTP	YPL274W	10	1.41944	2.2669	0.709405	0.658752
MTTP	YMR304C-A	29	4.11637	1.5757	0.59228	0.642443
MTTP	YOL032W	14	1.98721	1.77892	0.640865	0.638872
MTTP	YCR021C	13	1.84527	1.86783	0.665117	0.625506
MTTP	YDR114C	3	0.425831	2.918	0.785784	0.625081
MTTP	YLL038C	4	0.567775	2.53874	0.754107	0.624258
MTTP	YNL307C	7	0.993606	2.25805	0.728142	0.613869
MTTP	YBR180W	16	2.2711	1.67249	0.636644	0.60771
MTTP	YOR279C	11	1.56138	2.00724	0.699174	0.60383
MTTP	YHR134W	36	5.10997	1.43586	0.580026	0.603024
MTTP	YMR120C	7	0.993606	2.16901	0.723291	0.600185
MTTP	YLR083C	10	1.41944	2.19036	0.727063	0.59783
MTTP	YHR113W	5	0.709718	2.44503	0.757785	0.592224
MTTP	YCL038C	22	3.12276	1.42595	0.584871	0.591953
MTTP	YDR059C	42	5.96163	1.42141	0.585174	0.589636
MTTP	YAL053W	16	2.2711	1.67582	0.648954	0.588288
MTTP	YDL233W	310	44.0025	1.00152	0.423378	0.577498
MTTP	YMR269W	5	0.709718	2.08053	0.722883	0.576549
MTTP	YLR225C	14	1.98721	1.65751	0.65611	0.570001
MTTP	YMR102C	16	2.2711	1.48918	0.619048	0.567307
MTTP	YNL279W	179	25.4079	1.08822	0.48158	0.564154
MTTP	YPL039W	13	1.84527	1.95997	0.713508	0.561514
MTTP	YOR201C	5	0.709718	2.61022	0.786184	0.558108
MTTP	YJR137C	17	2.41304	1.83136	0.695466	0.557713
MTTP	YDR289C	3	0.425831	3.2285	0.828824	0.552641
MTTP	YMR040W	6	0.851662	2.34265	0.768865	0.54147
MTTP	YPL013C	9	1.27749	2.10628	0.743446	0.540374
MTTP	YBR250W	10	1.41944	1.88063	0.712974	0.539787
MTTP	YDL134C-A	19	2.69693	1.71228	0.686362	0.537035
MTTP	YOL065C	18	2.55499	2.12331	0.748263	0.534516
MTTP	YBR225W	6	0.851662	1.7386	0.692841	0.534026
MTTP	YOR017W	16	2.2711	1.59548	0.667593	0.530348
MTTP	YDR310C	8	1.13555	1.60391	0.672342	0.525534
MTTP	YDR093W	13	1.84527	1.50459	0.661369	0.509501
MTTP	YHR139C-A	10	1.41944	2.08572	0.757866	0.505024
MTTP	YBL068W	10	1.41944	2.24251	0.776513	0.501173
MTTP	YCL064C	10	1.41944	1.59263	0.686584	0.499155
MTTP	YDL172C	22	3.12276	1.21808	0.591688	0.497354
MTTP	YHR076W	10	1.41944	1.48945	0.668601	0.493603
MTTP	YLR201C	6	0.851662	2.27054	0.782615	0.493583
MTTP	YEL041W	31	4.40025	1.57554	0.691148	0.486609
MTTP	YCR020C	7	0.993606	1.89482	0.747722	0.478022
MTTP	YJR003C	11	1.56138	1.4787	0.678608	0.475243
MTTP	YCL022C	13	1.84527	1.88312	0.752149	0.466733
MTTP	YDL183C	28	3.97442	1.29837	0.649983	0.45445
MTTP	YJR073C	7	0.993606	1.97254	0.772269	0.449209
MTTP	YIL086C	8	1.13555	2.1879	0.79742	0.443226
MTTP	YDL243C	43	6.10358	1.37235	0.6795	0.439836
MTTP	YHL008C	9	1.27749	1.96257	0.778907	0.433909
MTTP	YDR215C	4	0.567775	2.45682	0.824774	0.4305
MTTP	YHL040C	9	1.27749	1.82103	0.765264	0.427461
MTTP	YPL104W	3	0.425831	2.39758	0.82407	0.421807
MTTP	YDR261C	7	0.993606	1.99255	0.789955	0.418526
MTTP	YIL099W	15	2.12916	1.6773	0.752308	0.415454
MTTP	YOR023C	18	2.55499	1.52292	0.734039	0.405038
MTTP	YDR109C	18	2.55499	1.5751	0.744489	0.402456
MTTP	YER080W	10	1.41944	1.81667	0.781673	0.396628
MTTP	YJR120W	9	1.27749	1.84313	0.785283	0.395751
MTTP	YOR378W	19	2.69693	1.44674	0.733245	0.385926
MTTP	YOR344C	79	11.2136	1.10119	0.649574	0.385884
MTTP	YIL145C	27	3.83248	1.42331	0.732392	0.380889
MTTP	YDR336W	3	0.425831	2.93993	0.870901	0.379541
MTTP	YDR221W	25	3.54859	1.57781	0.759617	0.379279
MTTP	YOR285W	21	2.98082	1.43893	0.740525	0.373365
MTTP	YML056C	15	2.12916	1.65402	0.775901	0.370664
MTTP	YML088W	33	4.68414	1.29896	0.714783	0.370486
MTTP	YLR028C	14	1.98721	1.5422	0.771524	0.352356
MTTP	YJL144W	9	1.27749	1.78451	0.807348	0.343789
MTTP	YDR157W	18	2.55499	1.47603	0.768607	0.341542
MTTP	YBR019C	14	1.98721	1.42605	0.760577	0.34143
MTTP	YDR231C	6	0.851662	1.97994	0.827922	0.340704
MTTP	YJR031C	15	2.12916	1.30941	0.741578	0.338381
MTTP	YBR228W	18	2.55499	1.31904	0.744765	0.336667
MTTP	YEL039C	13	1.84527	1.60387	0.792376	0.333002
MTTP	YOR375C	9	1.27749	1.45996	0.774744	0.328865
MTTP	YNL106C	15	2.12916	1.29622	0.749463	0.324751
MTTP	YHR207C	7	0.993606	1.34811	0.759441	0.3243
MTTP	YER118C	9	1.27749	1.67606	0.812543	0.314189
MTTP	YIL007C	18	2.55499	1.08011	0.72566	0.296316
MTTP	YDR010C	39	5.5358	1.20836	0.757892	0.292554
MTTP	YDR248C	10	1.41944	1.80997	0.839239	0.290972
MTTP	YBR263W	7	0.993606	1.38123	0.789778	0.290364
MTTP	YNL076W	13	1.84527	1.25046	0.768174	0.289889
MTTP	YPL038W	6	0.851662	1.88182	0.848615	0.28488
MTTP	YPL080C	3	0.425831	2.72535	0.90036	0.271555
MTTP	YLR180W	54	7.66496	0.903632	0.712049	0.260202
MTTP	YHR094C	3	0.425831	2.58008	0.901236	0.254819
MTTP	YOR087W	8	1.13555	1.37142	0.815261	0.253355
MTTP	YOR269W	3	0.425831	2.64199	0.904445	0.252456
MTTP	YPL023C	12	1.70332	1.21521	0.795374	0.248663
MTTP	YHL016C	9	1.27749	1.59014	0.84768	0.24221
MTTP	YPL249C	9	1.27749	2.08389	0.885513	0.238578
MTTP	YHL024W	5	0.709718	1.08351	0.784378	0.233629
MTTP	YLR130C	6	0.851662	1.80466	0.874266	0.226908
MTTP	YER072W	8	1.13555	1.25738	0.822173	0.223595
MTTP	YNL265C	6	0.851662	1.4545	0.846741	0.222917
MTTP	YLR224W	206	29.2404	0.922337	0.758485	0.222758
MTTP	YDL129W	37	5.25192	1.39637	0.84413	0.217653
MTTP	YLL012W	20	2.83887	1.39407	0.844397	0.216921
MTTP	YJR109C	41	5.81969	0.917663	0.764678	0.215946
MTTP	YNL239W	12	1.70332	1.48451	0.855784	0.214089
MTTP	YDR263C	15	2.12916	1.30399	0.838835	0.210157
MTTP	YJR024C	16	2.2711	1.32251	0.842402	0.208425
MTTP	YBR027C	8	1.13555	1.70565	0.879053	0.206293
MTTP	YJL012C	15	2.12916	1.11181	0.815429	0.205208
MTTP	YDL069C	8	1.13555	1.93673	0.894703	0.203931
MTTP	YLR031W	15	2.12916	1.16425	0.833704	0.19361
[truncated: 8,451 more rows]

## Sheet: Enhancers
Supplemental Table 2. List of toxicity modifiers for the 20 OMIM ORFs, based on Z-scores
Query (OMIM)	Subject (yeast gene deletion)	Barcode counts	Normalized barcode counts	Z-score	Error rate	Max Z-score
OPTN	YOR007C	61	2.92249	-2.21576	0.109331	-1.9735
OPTN	YMR139W	4	0.191639	-2.4964	0.213087	-1.96445
OPTN	YDL204W	27	1.29356	-2.17935	0.137981	-1.87864
OPTN	YLR119W	17	0.814465	-2.20818	0.176163	-1.81918
OPTN	YJL084C	33	1.58102	-2.27092	0.204413	-1.80671
OPTN	YML099C	2	0.0958194	-2.05301	0.17152	-1.70088
OPTN	YLR017W	18	0.862374	-2.20702	0.249171	-1.6571
OPTN	YLR012C	14	0.670736	-1.83509	0.106107	-1.64038
OPTN	YOR161C	72	3.4495	-1.71843	0.0463341	-1.6388
OPTN	YDL138W	82	3.92859	-1.7227	0.0528391	-1.63167
OPTN	YJR066W	1	0.0479097	-1.95396	0.167742	-1.62619
OPTN	YOL085C	7	0.335368	-1.81272	0.109412	-1.61438
OPTN	YBR025C	2	0.0958194	-1.92658	0.167744	-1.60341
OPTN	YLL007C	23	1.10192	-1.69422	0.0615905	-1.58987
OPTN	YPL135W	1	0.0479097	-1.72157	0.0812856	-1.58164
OPTN	YBR242W	17	0.814465	-1.90852	0.183016	-1.55923
OPTN	YIL069C	9	0.431187	-1.88458	0.180906	-1.54365
OPTN	YJR005W	2	0.0958194	-1.82423	0.154885	-1.54168
OPTN	YHL044W	3	0.143729	-1.78371	0.14393	-1.52698
OPTN	YDL180W	4	0.191639	-1.58334	0.0391402	-1.52137
OPTN	YLL024C	1	0.0479097	-1.64295	0.0810131	-1.50985
OPTN	YJL052W	1	0.0479097	-1.66881	0.11104	-1.48351
OPTN	YIL007C	9	0.431187	-1.6654	0.123684	-1.45942
OPTN	YML030W	12	0.574916	-1.6887	0.141498	-1.44976
OPTN	YHR139C-A	6	0.287458	-1.87756	0.236227	-1.43403
OPTN	YDL197C	31	1.4852	-1.78033	0.197671	-1.42841
OPTN	YOR100C	4	0.191639	-1.76723	0.197095	-1.41892
OPTN	YCL047C	1	0.0479097	-1.68294	0.164245	-1.40652
OPTN	YPL229W	6	0.287458	-1.75435	0.20346	-1.39741	1
OPTN	YLR044C	3	0.143729	-1.71976	0.187601	-1.39713
OPTN	YBR016W	12	0.574916	-1.85121	0.246202	-1.39544
OPTN	YPL165C	19	0.910284	-1.84978	0.261945	-1.36524
OPTN	YEL048C	16	0.766555	-1.84554	0.272381	-1.34285
OPTN	YJL170C	28	1.34147	-1.5434	0.131671	-1.34018
OPTN	YDL155W	67	3.20995	-1.63443	0.184333	-1.33315
OPTN	YOR039W	1	0.0479097	-1.54634	0.141753	-1.32714
OPTN	YCL012W	15	0.718645	-1.69074	0.226987	-1.30696
OPTN	YDL188C	28	1.34147	-1.62482	0.196057	-1.30626
OPTN	YER114C	1	0.0479097	-1.60695	0.190223	-1.30127
OPTN	YOR238W	1	0.0479097	-1.50258	0.142382	-1.28864
OPTN	YER005W	2	0.0958194	-1.71463	0.249261	-1.28724
OPTN	YOR375C	3	0.143729	-1.53382	0.163187	-1.28352
OPTN	YCR022C	1	0.0479097	-1.56089	0.18537	-1.27155
OPTN	YPL219W	2	0.0958194	-1.47365	0.141622	-1.26495
OPTN	YER020W	3	0.143729	-1.41894	0.122168	-1.24559
OPTN	YCL045C	1	0.0479097	-1.46703	0.154091	-1.24097
OPTN	YOL084W	27	1.29356	-1.59923	0.224651	-1.23996
OPTN	YBR206W	23	1.10192	-1.57362	0.21749	-1.23137
OPTN	YMR169c	6	0.287458	-1.52881	0.195251	-1.23031
OPTN	YOR051C	1	0.0479097	-1.62321	0.242182	-1.2301
OPTN	YHL030W	5	0.239548	-1.51355	0.189321	-1.227
OPTN	YIL056W	82	3.92859	-1.75296	0.308103	-1.21287
OPTN	YJL193W	4	0.191639	-1.64593	0.263336	-1.2125
OPTN	YJR098C	215	10.3006	-1.31254	0.0842436	-1.20196
OPTN	YOR023C	18	0.862374	-1.59751	0.247847	-1.20157
OPTN	YJR131W	5	0.239548	-1.33615	0.104714	-1.19624
OPTN	YMR070W	1	0.0479097	-1.45585	0.180596	-1.19293
OPTN	YEL010W	16	0.766555	-1.54913	0.230156	-1.19259
OPTN	YOR325W	63	3.01831	-1.4968	0.203576	-1.19209
OPTN	YDR005C	4	0.191639	-1.51871	0.215404	-1.19157
OPTN	YBR144C	4	0.191639	-1.55952	0.239219	-1.18645
OPTN	YJL004C	6	0.287458	-1.62125	0.269685	-1.18402
OPTN	YOL071W	9	0.431187	-1.44191	0.181689	-1.17993
OPTN	YDL136W	35	1.67684	-1.53912	0.233864	-1.17917
OPTN	YHR114W	1	0.0479097	-1.414	0.171295	-1.17179
OPTN	YML052W	33	1.58102	-1.55291	0.251263	-1.16272
OPTN	YHR103W	2	0.0958194	-1.60353	0.27565	-1.16152
OPTN	YOR216C	5	0.239548	-1.67516	0.309291	-1.15705
OPTN	YNL074C	142	6.80317	-1.45113	0.204656	-1.15415
OPTN	YHL033C	1	0.0479097	-1.63191	0.294174	-1.15184
OPTN	YJL030W	56	2.68294	-1.52086	0.245241	-1.14788
OPTN	YDR152W	19	0.910284	-1.47283	0.224315	-1.14245
OPTN	YNL129W	38	1.82057	-1.56566	0.275483	-1.13435
OPTN	YOR359W	1	0.0479097	-1.33795	0.16073	-1.1229
OPTN	YDL213C	1	0.0479097	-1.51403	0.258389	-1.12282
OPTN	YDR030C	28	1.34147	-1.40645	0.203169	-1.1207	1
OPTN	YCL056C	6	0.287458	-1.64266	0.31778	-1.12066
OPTN	YIL141W	18	0.862374	-1.50222	0.25611	-1.11749
OPTN	YBR116C	2	0.0958194	-1.51694	0.263742	-1.11686
OPTN	YBL011W	1	0.0479097	-1.4411	0.227998	-1.11253
OPTN	YIL096C	24	1.14983	-1.50057	0.262075	-1.10731
OPTN	YBR220C	22	1.05401	-1.50062	0.265415	-1.10233
OPTN	YDL211C	8	0.383277	-1.37858	0.203334	-1.09827
OPTN	YHL038C	1	0.0479097	-1.48275	0.261975	-1.0943
OPTN	YDL130W	7	0.335368	-1.31255	0.167005	-1.09335
OPTN	YER055C	51	2.44339	-1.23909	0.11943	-1.09111
OPTN	YPL168W	5	0.239548	-1.47491	0.263608	-1.08611	0
OPTN	YJL192C	3	0.143729	-1.35798	0.202069	-1.08357
OPTN	YDR178W	2	0.0958194	-1.3914	0.221518	-1.08318
OPTN	YPL185W	29	1.38938	-1.38105	0.216888	-1.08152
OPTN	YLR034C	8	0.383277	-1.3647	0.211044	-1.07669
OPTN	YLR001C	8	0.383277	-1.38158	0.220881	-1.07641
OPTN	YHR009C	51	2.44339	-1.4112	0.237242	-1.07641
OPTN	YPL163C	6	0.287458	-1.5416	0.303555	-1.07364
OPTN	YAL023C	1	0.0479097	-1.28012	0.163874	-1.07034
OPTN	YDL192W	2	0.0958194	-1.37867	0.224827	-1.06871
OPTN	YDL109C	18	0.862374	-1.30325	0.181984	-1.06608
OPTN	YBL005W	8	0.383277	-1.36077	0.222445	-1.05807
OPTN	YML032C-A	14	0.670736	-1.44406	0.274183	-1.04812
OPTN	YER084W	1	0.0479097	-1.55616	0.327571	-1.0464
OPTN	YJL043W	33	1.58102	-1.51737	0.310979	-1.0455
OPTN	YOR092W	11	0.527006	-1.38535	0.247685	-1.04222
OPTN	YBR212W	16	0.766555	-1.41027	0.264045	-1.03789
OPTN	YOR055W	21	1.0061	-1.40012	0.259162	-1.03726
OPTN	YJL147C	15	0.718645	-1.37353	0.246641	-1.03476
OPTN	YMR151W	2	0.0958194	-1.2934	0.200403	-1.03419
OPTN	YOL046C	19	0.910284	-1.43169	0.278842	-1.03247
OPTN	YDL236W	60	2.87458	-1.34945	0.236089	-1.03086
OPTN	YOR381W	27	1.29356	-1.34665	0.235885	-1.029
OPTN	YDR154C	3	0.143729	-1.32823	0.228525	-1.0247
OPTN	YJR154W	19	0.910284	-1.28144	0.206014	-1.01745
OPTN	YDR203W	2	0.0958194	-1.22276	0.169154	-1.01593
OPTN	YMR278W	15	0.718645	-1.27632	0.208952	-1.00963
OPTN	YNL318C	9	0.431187	-1.38958	0.276623	-1.00519
OPTN	YJL049W	32	1.53311	-1.61118	0.382703	-0.994575
OPTN	YJR110W	19	0.910284	-1.33737	0.25643	-0.994427	1
OPTN	YDL096C	16	0.766555	-1.39745	0.289033	-0.993541
OPTN	YDR133C	8	0.383277	-1.32255	0.249178	-0.993
OPTN	YBR076W	1	0.0479097	-1.39029	0.285967	-0.992714
OPTN	YNL311C	93	4.4556	-1.27437	0.222453	-0.990885
OPTN	YPL256C	12	0.574916	-1.27546	0.223823	-0.989985
OPTN	YOR153W	1	0.0479097	-1.21088	0.184449	-0.987532
OPTN	YIL116W	1	0.0479097	-1.20271	0.183318	-0.982234
OPTN	YPL230W	7	0.335368	-1.40134	0.299768	-0.981264
OPTN	YER172C-A	1	0.0479097	-1.05241	0.0676822	-0.981176
OPTN	YHR092C	2	0.0958194	-1.4017	0.30145	-0.979156
OPTN	YOL024W	1	0.0479097	-1.3255	0.263166	-0.976677
OPTN	YMR320W	54	2.58712	-1.31724	0.259178	-0.975838
OPTN	YMR173W-A	20	0.958194	-1.4187	0.317174	-0.968723
OPTN	YPL084W	1	0.0479097	-1.35256	0.287936	-0.963109
OPTN	YPL077C	1	0.0479097	-1.44895	0.335888	-0.962263
OPTN	YAR018C	2	0.0958194	-1.25913	0.236645	-0.961161
OPTN	YNL116W	6	0.287458	-1.30403	0.265859	-0.957344	1
OPTN	YPL100W	26	1.24565	-1.43256	0.332094	-0.956812
OPTN	YNL093W	27	1.29356	-1.27381	0.25126	-0.953755
OPTN	YLR040C	2	0.0958194	-1.2304	0.225331	-0.953154
OPTN	YPL139C	2	0.0958194	-1.21383	0.21654	-0.950988
OPTN	YMR133W	16	0.766555	-1.25427	0.242727	-0.949825
OPTN	YAR047C	1	0.0479097	-1.13969	0.167459	-0.94884
OPTN	YDL233W	649	31.0934	-1.15965	0.182804	-0.947663
OPTN	YLR218C	4	0.191639	-1.41026	0.328194	-0.947421
OPTN	YDL243C	70	3.35368	-1.36078	0.304178	-0.946862
OPTN	YCR017C	1	0.0479097	-1.41471	0.332413	-0.944445
OPTN	YJR015W	129	6.18035	-1.13188	0.166069	-0.943912
OPTN	YAR040C	38	1.82057	-1.24875	0.24487	-0.94297
OPTN	YJR153W	47	2.25175	-1.28137	0.269938	-0.935477
OPTN	YBR057C	24	1.14983	-1.39065	0.327774	-0.934828
OPTN	YML090W	11	0.527006	-1.3117	0.289775	-0.931604
OPTN	YBL019W	2	0.0958194	-1.33618	0.304036	-0.929936
OPTN	YOR105W	3	0.143729	-1.25352	0.261481	-0.925747
OPTN	YPL199C	6	0.287458	-1.15982	0.202173	-0.925335
OPTN	YMR023C	1	0.0479097	-1.16715	0.209099	-0.9231
OPTN	YDL069C	7	0.335368	-1.4965	0.384016	-0.921821
OPTN	YLR063W	1	0.0479097	-1.26412	0.27159	-0.920799
OPTN	YML058C-A	7	0.335368	-1.22233	0.24701	-0.9204
OPTN	YHR049W	3	0.143729	-1.20424	0.237028	-0.918802
OPTN	YLR102C	1	0.0479097	-1.21857	0.250423	-0.913408
OPTN	YDL038C	5	0.239548	-1.23971	0.263255	-0.913349
OPTN	YOR137C	2	0.0958194	-1.34964	0.323636	-0.912846
OPTN	YLR018C	336	16.0977	-1.04313	0.12624	-0.911442
OPTN	YJR059W	5	0.239548	-1.2818	0.294672	-0.904091
OPTN	YPL182C	8	0.383277	-1.22537	0.264096	-0.901755
OPTN	YIL053W	1	0.0479097	-1.24344	0.275413	-0.900981
OPTN	YDL076C	4	0.191639	-1.4035	0.358561	-0.900262
OPTN	YBR158W	8	0.383277	-1.21323	0.25969	-0.898169	1
OPTN	YLR035C	12	0.574916	-1.34687	0.333721	-0.897394
OPTN	YOL035C	4	0.191639	-1.35343	0.337599	-0.896511
OPTN	YDR157W	22	1.05401	-1.33252	0.329986	-0.892804
OPTN	YDL189W	68	3.25786	-1.10232	0.191791	-0.890909
OPTN	YDR222W	3	0.143729	-1.23509	0.280347	-0.888839
OPTN	YHR041C	1	0.0479097	-1.14422	0.227302	-0.884139
OPTN	YMR028W	1	0.0479097	-1.40173	0.370049	-0.883022
OPTN	YHR087W	3	0.143729	-1.16449	0.244213	-0.880105
OPTN	YDR272W	15	0.718645	-1.22372	0.281539	-0.879197
OPTN	YDR223W	16	0.766555	-1.29781	0.327062	-0.873344
OPTN	YBR208C	20	0.958194	-1.31078	0.334345	-0.872526
OPTN	YHR095W	3	0.143729	-0.982709	0.112675	-0.871982
OPTN	YBR063C	9	0.431187	-1.26324	0.311235	-0.870074
OPTN	YOL053C-A	1	0.0479097	-1.13339	0.235527	-0.866445
OPTN	YLR171W	8	0.383277	-1.40614	0.385379	-0.864242
OPTN	YCL062W	3	0.143729	-1.16646	0.260009	-0.863172
OPTN	YNL193W	9	0.431187	-1.1743	0.266913	-0.860865
OPTN	YJR036C	5	0.239548	-1.20801	0.287653	-0.860519
OPTN	YER119C	7	0.335368	-1.3155	0.348397	-0.857187
OPTN	YBR083W	7	0.335368	-1.33444	0.358099	-0.856576
OPTN	YOR182C	3	0.143729	-1.187	0.278602	-0.856302
OPTN	YIR004W	1	0.0479097	-1.17247	0.272363	-0.853131
OPTN	YML042W	26	1.24565	-1.28747	0.339635	-0.850201
OPTN	YPL092W	4	0.191639	-1.35628	0.377575	-0.844182
OPTN	YML129C	2	0.0958194	-1.08773	0.225107	-0.842877
OPTN	YMR127C	16	0.766555	-1.31045	0.357123	-0.84246
OPTN	YCR018C	32	1.53311	-1.3105	0.357884	-0.841495
OPTN	YPL105C	5	0.239548	-1.32244	0.367169	-0.836879
OPTN	YML117W	1	0.0479097	-1.29055	0.35271	-0.83536
OPTN	YMR280C	4	0.191639	-1.06675	0.227376	-0.824199
OPTN	YOR050C	23	1.10192	-1.36096	0.396011	-0.822007
OPTN	YHL010C	13	0.622826	-1.25164	0.344064	-0.820995
OPTN	YMR170C	32	1.53311	-1.09591	0.252416	-0.819283
OPTN	YBR067C	20	0.958194	-1.20572	0.321261	-0.818371
OPTN	YDL050C	5	0.239548	-1.28905	0.367512	-0.815307
OPTN	YEL005C	2	0.0958194	-1.17079	0.304161	-0.814681
OPTN	YPL062W	1	0.0479097	-1.17079	0.309126	-0.80887
OPTN	YOR142W	10	0.479097	-0.966709	0.165048	-0.807155
OPTN	YJR128W	9	0.431187	-1.3404	0.398592	-0.806126
OPTN	YLR152C	15	0.718645	-1.16276	0.313909	-0.797762
OPTN	YLR123C	13	0.622826	-1.13338	0.296425	-0.797421
OPTN	YPL116W	15	0.718645	-1.02217	0.220952	-0.796316
OPTN	YBR221C	1	0.0479097	-1.35738	0.417148	-0.791153
OPTN	YPL123C	2	0.0958194	-1.15266	0.316188	-0.788199
OPTN	YPL134C	38	1.82057	-1.17768	0.332139	-0.786523
OPTN	YHR078W	126	6.03662	-1.07161	0.266203	-0.786343
OPTN	YDL118W	28	1.34147	-1.1308	0.304777	-0.78616
OPTN	YOR347C	24	1.14983	-1.08459	0.275965	-0.785284
OPTN	YNL314W	5	0.239548	-1.15344	0.323603	-0.780186
OPTN	YJL134W	22	1.05401	-1.27094	0.386353	-0.779906
OPTN	YDR229W	4	0.191639	-1.14982	0.322846	-0.778607
OPTN	YLL061W	19	0.910284	-1.17518	0.340453	-0.775087
OPTN	YOR032C	4	0.191639	-1.07337	0.278927	-0.773979
OPTN	YMR271C	46	2.20385	-1.11595	0.30662	-0.773777
OPTN	YML014W	1	0.0479097	-1.24031	0.376145	-0.773772
OPTN	YLL028W	32	1.53311	-1.25567	0.385469	-0.771648
OPTN	YJR069C	18	0.862374	-1.14944	0.328748	-0.771565
OPTN	YDR110W	30	1.43729	-1.17215	0.343137	-0.76994
OPTN	YDR147W	1	0.0479097	-1.30226	0.409367	-0.76916
OPTN	YER177W	9	0.431187	-1.21363	0.367723	-0.76735
OPTN	YNL249C	13	0.622826	-1.13662	0.328616	-0.763111
OPTN	YMR269W	1	0.0479097	-1.03711	0.266352	-0.760873
OPTN	YMR010W	13	0.622826	-1.26749	0.401635	-0.758423
OPTN	YML071C	8	0.383277	-1.06969	0.292558	-0.756741
OPTN	YDR171W	43	2.06012	-1.11273	0.319985	-0.756673
OPTN	YDR206W	12	0.574916	-1.10939	0.319191	-0.755281
OPTN	YNL283C	6	0.287458	-1.23533	0.389364	-0.754334
OPTN	YDR192C	64	3.06622	-0.874457	0.14223	-0.750083
OPTN	YLL046C	26	1.24565	-1.21833	0.384793	-0.749524
OPTN	YOR324C	31	1.4852	-0.929037	0.196647	-0.746345
OPTN	YER106W	111	5.31797	-1.0739	0.308	-0.743139
OPTN	YHL007C	6	0.287458	-1.04606	0.290564	-0.742111
OPTN	YDL156W	114	5.4617	-1.29144	0.425454	-0.741992
OPTN	YAL028W	9	0.431187	-1.16024	0.361655	-0.740635
OPTN	YLR104W	8	0.383277	-1.11633	0.337441	-0.739632
OPTN	YPL129W	1	0.0479097	-1.08475	0.318167	-0.739616
OPTN	YMR120C	4	0.191639	-1.16529	0.365309	-0.739597
OPTN	YNL270C	5	0.239548	-1.11292	0.339431	-0.735161
OPTN	YDL142C	71	3.40159	-1.06593	0.310572	-0.734882
OPTN	YPL014W	8	0.383277	-1.14978	0.360872	-0.734859
OPTN	YOR062C	44	2.10803	-0.990939	0.259911	-0.733382
OPTN	YER056C	67	3.20995	-1.05076	0.302351	-0.733059
OPTN	YLL058W	36	1.72475	-1.1788	0.379622	-0.731302
OPTN	YOR070C	2	0.0958194	-1.16165	0.371185	-0.73046
OPTN	YML082W	30	1.43729	-1.25234	0.417325	-0.729706
OPTN	YDR057W	15	0.718645	-1.16235	0.372598	-0.729258
OPTN	YDL107W	1	0.0479097	-1.4507	0.497355	-0.729185
OPTN	YNL157W	2	0.0958194	-0.96075	0.241453	-0.728774
OPTN	YDR271C	3	0.143729	-1.26305	0.426057	-0.72492
OPTN	YDR029W	30	1.43729	-0.973198	0.255928	-0.724129
OPTN	YBR129C	3	0.143729	-1.08714	0.334093	-0.723935
OPTN	YOR151C	7	0.335368	-1.0277	0.298576	-0.72085
OPTN	YLR087C	7	0.335368	-1.15402	0.376864	-0.719109
OPTN	YJR003C	8	0.383277	-1.01881	0.299375	-0.713803
OPTN	YER051W	3	0.143729	-1.06401	0.329419	-0.713503
OPTN	YOR197W	10	0.479097	-1.16234	0.387194	-0.712291
OPTN	YNL326C	199	9.53403	-0.910585	0.217992	-0.712084
OPTN	YAL029C	6	0.287458	-1.09333	0.348884	-0.711885
OPTN	YIL157C	14	0.670736	-1.12132	0.368347	-0.708282
OPTN	YMR306W	28	1.34147	-1.21339	0.416523	-0.707987
OPTN	YJR133W	71	3.40159	-1.07834	0.344157	-0.70722
OPTN	YOR139C	13	0.622826	-1.04398	0.322756	-0.707029
OPTN	YPL149W	15	0.718645	-1.03194	0.318926	-0.702831
OPTN	YOR233W	44	2.10803	-0.900448	0.227271	-0.695802
OPTN	YOL028C	1	0.0479097	-0.960297	0.275714	-0.69553
OPTN	YBL013W	8	0.383277	-1.10046	0.368348	-0.695107
OPTN	YIL015C-A	1	0.0479097	-1.08651	0.36305	-0.692054
OPTN	YDR069C	1	0.0479097	-1.1052	0.374242	-0.691586
OPTN	YOL042W	1	0.0479097	-0.999771	0.311292	-0.68855
OPTN	YEL017W	1	0.0479097	-1.04974	0.344601	-0.687997
OPTN	YOR317W	33	1.58102	-1.16242	0.408859	-0.687155
OPTN	YDR282C	1	0.0479097	-1.21515	0.436021	-0.685321
OPTN	YDR051C	24	1.14983	-0.947615	0.27727	-0.684869
OPTN	YHR193C	3	0.143729	-0.979136	0.301463	-0.683963
OPTN	YIL117C	5	0.239548	-0.979142	0.302439	-0.683012
OPTN	YNL237W	2	0.0958194	-1.1334	0.398361	-0.681895
OPTN	YMR030W	1	0.0479097	-1.05865	0.357364	-0.680326
OPTN	YOR085W	5	0.239548	-1.07267	0.371903	-0.673743
OPTN	YHR203C	1	0.0479097	-1.37682	0.51287	-0.67069
OPTN	YOR338W	6	0.287458	-1.13653	0.411119	-0.669279
OPTN	YBR227C	10	0.479097	-0.985551	0.321019	-0.66917
OPTN	YER098W	41	1.9643	-1.09941	0.393171	-0.667153
OPTN	YOR162C	2	0.0958194	-1.02758	0.354693	-0.663101
OPTN	YDR312W	1	0.0479097	-1.05146	0.371177	-0.661181
OPTN	YOR323C	3	0.143729	-1.0234	0.354589	-0.660515
OPTN	YDR008C	16	0.766555	-1.00939	0.34571	-0.660434
OPTN	YLR214W	2	0.0958194	-1.07948	0.389625	-0.658886
OPTN	YDR033W	48	2.29966	-1.04602	0.37261	-0.656263
OPTN	YDL085W	4	0.191639	-1.07442	0.389354	-0.656092
OPTN	YNL121C	2	0.0958194	-1.02965	0.363041	-0.655848
OPTN	YDR163W	1	0.0479097	-1.1178	0.414398	-0.654587
OPTN	YAL034C	25	1.19774	-1.03148	0.366607	-0.653332
OPTN	YML037C	80	3.83277	-0.90466	0.279777	-0.651557
OPTN	YDR198C	8	0.383277	-1.13786	0.427607	-0.651305
OPTN	YIL130W	3	0.143729	-0.909486	0.285782	-0.649572
OPTN	YPL159C	24	1.14983	-1.19957	0.459066	-0.648888
OPTN	YNL063W	132	6.32408	-0.890719	0.272147	-0.648312
OPTN	YCL030C	1	0.0479097	-0.965646	0.329709	-0.647264
OPTN	YDL183C	40	1.91639	-0.997943	0.352194	-0.646474
OPTN	YDL006W	1	0.0479097	-1.00941	0.359955	-0.646065
OPTN	YMR265C	41	1.9643	-1.15382	0.440288	-0.645809
OPTN	YNL211C	9	0.431187	-1.06797	0.395464	-0.645627
OPTN	YOR108W	9	0.431187	-1.05052	0.386036	-0.644982
OPTN	YPL197C	1	0.0479097	-1.10077	0.414611	-0.644381
OPTN	YML070W	25	1.19774	-1.17092	0.449828	-0.644205
OPTN	YPL155C	16	0.766555	-1.03462	0.379465	-0.642018
OPTN	YJR146W	3564	170.75	-0.775814	0.172616	-0.641896
OPTN	YNL134C	17	0.814465	-1.10521	0.419823	-0.641215
OPTN	YHR155W	11	0.527006	-1.1985	0.465544	-0.640545
OPTN	YOR219C	7	0.335368	-0.993456	0.35545	-0.640333
OPTN	YER119C-A	20	0.958194	-0.981509	0.348474	-0.639479
OPTN	YLR107W	11	0.527006	-1.09672	0.418423	-0.637828
OPTN	YAL046C	1	0.0479097	-1.4033	0.546413	-0.636518
OPTN	YJR061W	26	1.24565	-1.00611	0.3704	-0.633444
OPTN	YCL013W	3	0.143729	-1.05011	0.397922	-0.632251
OPTN	YIL035C	2	0.0958194	-0.976142	0.353365	-0.631208
OPTN	YNL075W	2	0.0958194	-0.936368	0.327817	-0.629411
OPTN	YLR072W	17	0.814465	-1.01295	0.379555	-0.628478
OPTN	YML035C-A	10	0.479097	-0.987971	0.364012	-0.628337
OPTN	YJL066C	15	0.718645	-1.09352	0.425444	-0.628289
OPTN	YLR217W	5	0.239548	-1.05331	0.40446	-0.627291
OPTN	YOR093C	11	0.527006	-1.00464	0.376179	-0.626715
OPTN	YEL013W	4	0.191639	-1.00385	0.375725	-0.626681
OPTN	YDL234C	5	0.239548	-0.98405	0.363658	-0.626193	1
OPTN	YBR172C	125	5.98871	-0.828141	0.244594	-0.625583
OPTN	YDL113C	33	1.58102	-1.05693	0.408134	-0.625563
OPTN	YBR103W	1	0.0479097	-1.09627	0.430818	-0.623977
OPTN	YDL146W	4	0.191639	-1.1098	0.439238	-0.622335
OPTN	YMR306C-A	29	1.38938	-1.01179	0.385375	-0.621874
OPTN	YLR142W	6	0.287458	-1.15006	0.460873	-0.620031
OPTN	YDL227C	137	6.56363	-0.864536	0.290597	-0.613305
OPTN	YBR119W	8	0.383277	-0.955788	0.358712	-0.612936
OPTN	YNL329C	29	1.38938	-1.18434	0.482506	-0.612891
OPTN	YIL114C	7	0.335368	-0.930921	0.346119	-0.608711
OPTN	YMR118C	20	0.958194	-0.822373	0.26082	-0.607882
OPTN	YDL161W	48	2.29966	-0.748049	0.190706	-0.605392
OPTN	YMR099C	2	0.0958194	-1.05165	0.424895	-0.604807
OPTN	YNL077W	9	0.431187	-0.934907	0.355309	-0.602727
OPTN	YBR262C	40	1.91639	-1.09667	0.452823	-0.600074
OPTN	YOR191W	3	0.143729	-1.1528	0.479726	-0.599774
OPTN	YJL045W	22	1.05401	-1.07113	0.441399	-0.598335
OPTN	YNL334C	2	0.0958194	-1.01228	0.409379	-0.597874
OPTN	YCL011C	3	0.143729	-0.907691	0.342135	-0.597138
OPTN	YNL219C	52	2.4913	-0.859691	0.306603	-0.596107
OPTN	YAL048C	1	0.0479097	-0.98847	0.399123	-0.593949
OPTN	YER040W	79	3.78486	-0.880485	0.325731	-0.593684
OPTN	YML029W	29	1.38938	-0.78143	0.243639	-0.591043
OPTN	YDR143C	58	2.77876	-0.877498	0.329124	-0.588693
OPTN	YIL024C	6	0.287458	-1.00315	0.414656	-0.587185
OPTN	YLR011W	18	0.862374	-0.841126	0.303237	-0.586065
OPTN	YML121W	1	0.0479097	-0.964527	0.394851	-0.583682
OPTN	YNL094W	27	1.29356	-0.995719	0.414813	-0.582682
OPTN	YCL024W	3	0.143729	-0.938613	0.381033	-0.58097
OPTN	YJL068C	59	2.82667	-1.03315	0.438564	-0.580048
OPTN	YNL105W	12	0.574916	-0.816284	0.293803	-0.576457
OPTN	YLR420W	3	0.143729	-1.03363	0.444824	-0.573846
OPTN	YDL125C	3	0.143729	-0.903063	0.368871	-0.569949
OPTN	YHR051W	2	0.0958194	-0.851912	0.334538	-0.566915
OPTN	YPL102C	1	0.0479097	-1.18691	0.52479	-0.564032
OPTN	YOR016C	17	0.814465	-0.842403	0.332349	-0.562431
OPTN	YBL068W	11	0.527006	-1.20007	0.53268	-0.560819
OPTN	YIL023C	2	0.0958194	-1.00217	0.44179	-0.559422
OPTN	YDR258C	60	2.87458	-0.880773	0.366693	-0.557799
OPTN	YER160C	19	0.910284	-0.812748	0.313889	-0.557636
OPTN	YHL043W	31	1.4852	-0.989379	0.436948	-0.557072
OPTN	YDR026C	45	2.15594	-0.867183	0.358939	-0.555917
OPTN	YMR178W	12	0.574916	-1.03042	0.460793	-0.555612
OPTN	YIL020C	6	0.287458	-0.756551	0.26606	-0.555263
OPTN	YML034W	3	0.143729	-0.956149	0.420106	-0.554466
OPTN	YOL006C	3	0.143729	-0.938437	0.412435	-0.551393
OPTN	YCL014W	82	3.92859	-0.79667	0.310201	-0.549542
OPTN	YJL213W	5	0.239548	-0.994852	0.448059	-0.5491
OPTN	YER058W	4	0.191639	-1.05479	0.480911	-0.547531
OPTN	YDR018C	53	2.53921	-0.996484	0.451083	-0.546987
OPTN	YIL110W	17	0.814465	-1.02813	0.46932	-0.545606
OPTN	YHR133C	4	0.191639	-1.05978	0.487193	-0.54346
OPTN	YOL061W	12	0.574916	-0.78134	0.306427	-0.541917
OPTN	YER002W	3	0.143729	-0.667423	0.190242	-0.540451
OPTN	YHR142W	3	0.143729	-0.987068	0.452657	-0.540265
OPTN	YDL239C	22	1.05401	-0.875985	0.383904	-0.539691
OPTN	YJR014W	48	2.29966	-0.853225	0.368529	-0.538786
OPTN	YEL016C	34	1.62893	-0.848924	0.369225	-0.53548
OPTN	YER097W	4	0.191639	-1.11777	0.521196	-0.535194
OPTN	YMR264W	27	1.29356	-0.929006	0.424777	-0.534385
OPTN	YNL196C	6	0.287458	-0.945589	0.436498	-0.532841
OPTN	YNL322C	97	4.64724	-0.898138	0.408048	-0.531654
OPTN	YHL006C	13	0.622826	-0.902165	0.411078	-0.531305
OPTN	YDR083W	1	0.0479097	-1.07666	0.508258	-0.52944
OPTN	YDR042C	37	1.77266	-0.885218	0.403742	-0.527819
OPTN	YDR022C	48	2.29966	-1.00862	0.477361	-0.527142
OPTN	YBR113W	1	0.0479097	-1.04966	0.499145	-0.525727
OPTN	YBL042C	1	0.0479097	-1.01235	0.481505	-0.524897
OPTN	YLL056C	14	0.670736	-1.03878	0.496497	-0.52303
OPTN	YDL023C	5	0.239548	-1.04283	0.500821	-0.52056
OPTN	YML057W	13	0.622826	-0.892717	0.417282	-0.520202
OPTN	YOR042W	23	1.10192	-0.846196	0.385306	-0.520152
OPTN	YIL121W	7	0.335368	-0.828491	0.37731	-0.515894
OPTN	YPL245W	11	0.527006	-0.940945	0.457221	-0.510725
OPTN	YHR096C	1	0.0479097	-0.931239	0.454844	-0.507671
OPTN	YDL101C	1	0.0479097	-1.01059	0.501275	-0.504006
OPTN	YDR061W	18	0.862374	-1.07424	0.532904	-0.501773
OPTN	YML120C	25	1.19774	-1.03252	0.515782	-0.499965
OPTN	YDR213W	2	0.0958194	-1.06455	0.531001	-0.499272
OPTN	YMR251W-A	2	0.0958194	-0.8148	0.388154	-0.498532
OPTN	YMR186W	62	2.9704	-0.833312	0.403926	-0.496716
OPTN	YDR120C	3	0.143729	-0.90358	0.45161	-0.495514
OPTN	YOR132W	1	0.0479097	-0.756338	0.347126	-0.493793
OPTN	YPL136W	18	0.862374	-0.830711	0.406467	-0.493055
OPTN	YOR131C	2	0.0958194	-1.0121	0.513272	-0.492617
OPTN	YOR366W	22	1.05401	-0.831004	0.407849	-0.49208
OPTN	YER059W	43	2.06012	-0.824425	0.404604	-0.490859
OPTN	YMR123W	1	0.0479097	-0.722856	0.321501	-0.490457
OPTN	YDR296W	1	0.0479097	-0.98691	0.504889	-0.48863
OPTN	YPL264C	6	0.287458	-0.915871	0.466494	-0.488623
OPTN	YLR135W	11	0.527006	-1.09736	0.555523	-0.487749
OPTN	YJL106W	26	1.24565	-0.91921	0.470891	-0.486363
OPTN	YDL033C	4	0.191639	-0.891539	0.454777	-0.486088
OPTN	YBR058C	8	0.383277	-0.840844	0.422925	-0.48523
OPTN	YCR020C-A	2	0.0958194	-1.01558	0.523569	-0.483854
OPTN	YIL102C	5	0.239548	-0.816689	0.408063	-0.483428
OPTN	YMR164C	27	1.29356	-0.960111	0.497421	-0.482532
OPTN	YHR137W	1	0.0479097	-0.785246	0.385641	-0.482423
OPTN	YPL156C	1	0.0479097	-1.13364	0.574738	-0.482092
OPTN	YNL252C	4	0.191639	-1.0272	0.532654	-0.480059
OPTN	YOR321W	28	1.34147	-0.96224	0.503567	-0.477688
OPTN	YDR153C	1225	58.6894	-0.687949	0.306772	-0.476905
OPTN	YOR202W	7	0.335368	-0.909041	0.475405	-0.476878
OPTN	YDR130C	20	0.958194	-1.03577	0.540005	-0.476449
OPTN	YOR125C	13	0.622826	-0.814789	0.415404	-0.476322
OPTN	YJL100W	31	1.4852	-0.878621	0.459347	-0.475029
OPTN	YDL088C	7	0.335368	-0.921364	0.484968	-0.474532
OPTN	YDR102C	18	0.862374	-0.923253	0.486988	-0.47364
OPTN	YJR135C	10	0.479097	-0.79789	0.408897	-0.471635
OPTN	YER075C	10	0.479097	-0.896997	0.481496	-0.465097
OPTN	YHR057C	16	0.766555	-0.905115	0.486962	-0.464359
OPTN	YIL133C	5	0.239548	-0.935952	0.507935	-0.460549
OPTN	YHR202W	10	0.479097	-0.91723	0.499293	-0.459263
OPTN	YAL043C-a	12	0.574916	-0.902032	0.491964	-0.458265
OPTN	YMR251W	41	1.9643	-0.985093	0.535013	-0.458055
OPTN	YOR301W	6	0.287458	-0.810035	0.434749	-0.457873
OPTN	YDL210W	25	1.19774	-0.769601	0.406411	-0.456827
OPTN	YBR264C	9	0.431187	-0.928407	0.508512	-0.456301
OPTN	YBR131W	1	0.0479097	-0.746564	0.389403	-0.45585
OPTN	YJL022W	5	0.239548	-0.973419	0.532621	-0.454956
OPTN	YDR084C	33	1.58102	-0.777129	0.414736	-0.454826
OPTN	YJR001W	25	1.19774	-0.968654	0.531339	-0.453971
OPTN	YNL130C	29	1.38938	-0.757546	0.403977	-0.451515
OPTN	YDR123C	29	1.38938	-0.903038	0.504036	-0.447874
OPTN	YBR156C	3	0.143729	-0.828442	0.46008	-0.447292
OPTN	YAR029W	17	0.814465	-0.583794	0.234963	-0.446624
OPTN	YOL041C	1	0.0479097	-1.04306	0.572142	-0.446283
OPTN	YDL032W	1	0.0479097	-0.949756	0.5309	-0.44553
OPTN	YJR021C	7	0.335368	-0.865357	0.48609	-0.444716
OPTN	YBL107C	2	0.0958194	-0.728337	0.390769	-0.443726
OPTN	YOR097C	21	1.0061	-0.879777	0.496266	-0.443174
OPTN	YER130C	7	0.335368	-0.628416	0.296015	-0.442395
OPTN	YOR343C	66	3.16204	-0.803634	0.451907	-0.440466
OPTN	YDR096W	16	0.766555	-0.831834	0.470605	-0.440369
OPTN	YBR258C	16	0.766555	-0.964123	0.543572	-0.440053
OPTN	YDR089W	202	9.67776	-0.890001	0.511456	-0.434805
OPTN	YCR011C	12	0.574916	-0.931046	0.534645	-0.433266
OPTN	YML007W	19	0.910284	-0.962281	0.550098	-0.432932	1
OPTN	YEL015W	1	0.0479097	-0.801406	0.461822	-0.431299
OPTN	YDR032C	22	1.05401	-1.1725	0.633392	-0.429847
OPTN	YBL087C	2	0.0958194	-0.891354	0.517824	-0.42979
OPTN	YML058W	20	0.958194	-0.846924	0.494314	-0.428278
OPTN	YIL095W	16	0.766555	-0.81002	0.471303	-0.428255	1
OPTN	YMR006C	52	2.4913	-0.92427	0.536738	-0.428179
OPTN	YHR210C	2	0.0958194	-0.564814	0.241979	-0.428141
OPTN	YDR151C	26	1.24565	-0.890652	0.519535	-0.427927
OPTN	YER147C	1	0.0479097	-0.785595	0.455883	-0.427456
OPTN	YBR137W	11	0.527006	-0.939313	0.545374	-0.427036
OPTN	YLR016C	91	4.35978	-0.709167	0.399176	-0.426084
OPTN	YHL016C	10	0.479097	-0.92295	0.538642	-0.425811
OPTN	YIL052C	22	1.05401	-0.834877	0.490232	-0.425594
OPTN	YOL054W	2	0.0958194	-0.927092	0.541687	-0.424898
OPTN	YMR275C	19	0.910284	-0.822927	0.485435	-0.423449
OPTN	YLL025W	2	0.0958194	-0.818588	0.483663	-0.422668
OPTN	YOL014W	139	6.65945	-0.663104	0.3643	-0.421535
OPTN	YBR100W	20	0.958194	-0.888929	0.526272	-0.421111
OPTN	YNL324W	1	0.0479097	-0.458725	0.0823561	-0.420947
OPTN	YDL063C	1	0.0479097	-0.936636	0.550967	-0.420581
OPTN	YLR013W	26	1.24565	-0.774534	0.462394	-0.416394
OPTN	YOR178C	10	0.479097	-0.957769	0.566713	-0.414989
OPTN	YDL054C	1	0.0479097	-0.898623	0.538713	-0.414523
OPTN	YBR259W	18	0.862374	-0.829181	0.502151	-0.412807
OPTN	YOR309C	2	0.0958194	-0.827576	0.504248	-0.410273
OPTN	YBL008W	4	0.191639	-0.863972	0.525778	-0.409714
OPTN	YBL047C	1	0.0479097	-0.756229	0.459658	-0.408622
OPTN	YIL065C	17	0.814465	-1.12372	0.636772	-0.408164
OPTN	YDR043C	45	2.15594	-0.647993	0.37187	-0.407024
OPTN	YLR120C	5	0.239548	-0.89201	0.543921	-0.406827
OPTN	YOR006C	22	1.05401	-0.845411	0.519984	-0.405811
OPTN	YLR038C	5	0.239548	-0.700639	0.420996	-0.405673
OPTN	YMR012W	62	2.9704	-0.663057	0.390779	-0.403949
OPTN	YER146W	9	0.431187	-0.87615	0.541421	-0.401784
OPTN	YDR247W	4	0.191639	-0.931274	0.569598	-0.400822
OPTN	YPL207W	2	0.0958194	-0.706499	0.432822	-0.400711
OPTN	YPL001W	1	0.0479097	-0.781133	0.487847	-0.40006
OPTN	YMR019W	26	1.24565	-0.489743	0.187379	-0.397976
OPTN	YIL120W	149	7.13854	-0.598723	0.338004	-0.396352
OPTN	YLR191W	3	0.143729	-0.770361	0.485655	-0.396231
OPTN	YDL072C	7	0.335368	-0.789773	0.501043	-0.394063
OPTN	YAL005C	18	0.862374	-0.924755	0.575209	-0.392828
OPTN	YOR252W	4	0.191639	-0.911458	0.569989	-0.391937
OPTN	YDR007W	31	1.4852	-0.656955	0.405919	-0.390284
OPTN	YLR134W	6	0.287458	-0.874742	0.554338	-0.389839
OPTN	YOR357C	15	0.718645	-0.990646	0.606837	-0.389485
OPTN	YCL060C	1	0.0479097	-0.903834	0.57067	-0.388043
OPTN	YLR194C	6	0.287458	-0.772362	0.498292	-0.3875
OPTN	YBR171W	1	0.0479097	-1.01501	0.620461	-0.385237
OPTN	YDR112W	67	3.20995	-0.702608	0.451712	-0.385231
OPTN	YLR177W	14	0.670736	-0.982381	0.608486	-0.384616
OPTN	YMR191W	36	1.72475	-0.78123	0.508885	-0.383674
OPTN	YML017W	66	3.16204	-0.886219	0.567885	-0.382948
OPTN	YOL019W	8	0.383277	-0.676831	0.436264	-0.381554
OPTN	YJL027C	30	1.43729	-0.714789	0.466343	-0.381452
OPTN	YPL166W	14	0.670736	-0.55943	0.319481	-0.380703
OPTN	YBR008C	13	0.622826	-0.784088	0.515041	-0.38025
OPTN	YDR215C	2	0.0958194	-0.896831	0.576413	-0.379886
OPTN	YMR204C	14	0.670736	-0.81153	0.533405	-0.378656
OPTN	YBR246W	19	0.910284	-0.760979	0.504077	-0.377387
OPTN	YPL212C	6	0.287458	-0.649522	0.418997	-0.377374
OPTN	YEL049W	39	1.86848	-0.778643	0.515508	-0.377247
OPTN	YBR186W	9	0.431187	-1.0024	0.624588	-0.376311
OPTN	YDL034W	7	0.335368	-0.871476	0.568519	-0.376025
OPTN	YOR255W	12	0.574916	-0.773592	0.514767	-0.375373
OPTN	YJL182C	12	0.574916	-0.874764	0.571847	-0.374532
OPTN	YER149C	1	0.0479097	-1.16211	0.677764	-0.374475
OPTN	YAL007C	12	0.574916	-0.81442	0.540423	-0.374289
OPTN	YPL198W	9	0.431187	-0.668172	0.442597	-0.372442
OPTN	YML020W	7	0.335368	-0.776951	0.521706	-0.371611
OPTN	YBL096C	13	0.622826	-0.905046	0.590006	-0.371063
OPTN	YEL066W	21	1.0061	-0.819719	0.547644	-0.370804
OPTN	YCL063W	3	0.143729	-0.857112	0.567608	-0.370608
OPTN	YJR142W	26	1.24565	-0.907531	0.592733	-0.369608
OPTN	YJL144W	10	0.479097	-0.901182	0.590159	-0.369342
OPTN	YOR328W	50	2.39548	-0.874174	0.579302	-0.367763
OPTN	YHL019C	6	0.287458	-0.769203	0.522704	-0.367137
OPTN	YCL061C	1	0.0479097	-0.908068	0.598743	-0.364369
OPTN	YDL086W	2	0.0958194	-0.900821	0.596241	-0.363715
OPTN	YMR316W	23	1.10192	-0.808148	0.550742	-0.363067
OPTN	YDR287W	2	0.0958194	-0.819451	0.558604	-0.361702
OPTN	YNL191W	17	0.814465	-0.845642	0.572643	-0.361391
OPTN	YLR042C	11	0.527006	-0.765134	0.531569	-0.358412
OPTN	YDL002C	4	0.191639	-1.00387	0.645039	-0.356334
OPTN	YLR181C	5	0.239548	-0.875705	0.59397	-0.355562
OPTN	YML110C	6	0.287458	-0.893354	0.603467	-0.354244
OPTN	YLR204W	3	0.143729	-0.835776	0.576387	-0.354046
OPTN	YBR147W	44	2.10803	-0.591642	0.40539	-0.351797
OPTN	YIL125W	3	0.143729	-0.933783	0.627155	-0.348156
OPTN	YOR341W	3	0.143729	-0.651786	0.466072	-0.348007
OPTN	YOR082C	17	0.814465	-0.918335	0.621232	-0.347836
OPTN	YOR251C	2	0.0958194	-0.741697	0.533344	-0.346117
OPTN	YBL066C	21	1.0061	-0.91276	0.621793	-0.345212
OPTN	YCL027W	3	0.143729	-0.68312	0.497991	-0.342932
OPTN	YNL233W	14	0.670736	-0.833425	0.591537	-0.340424
OPTN	YJL148W	12	0.574916	-0.66945	0.491989	-0.340088
OPTN	YMR110C	14	0.670736	-0.812477	0.58245	-0.33925
OPTN	YOR155C	46	2.20385	-0.753476	0.549879	-0.339156
OPTN	YDR205W	18	0.862374	-0.534806	0.366337	-0.338887
OPTN	YCL006C	122	5.84498	-0.673541	0.497503	-0.338452
OPTN	YAL019W	14	0.670736	-0.838026	0.598797	-0.336219
OPTN	YPR004C	10	0.479097	-0.651813	0.486252	-0.334867
OPTN	YOR318C	20	0.958194	-0.861819	0.61494	-0.331852
OPTN	YBR012C	18	0.862374	-0.678719	0.512838	-0.330646
OPTN	YJL116C	41	1.9643	-0.742983	0.554993	-0.330633
OPTN	YHR108W	16	0.766555	-0.63263	0.479671	-0.329175
OPTN	YOR144C	5	0.239548	-0.453469	0.276165	-0.328237
OPTN	YJR119C	26	1.24565	-0.762664	0.570292	-0.327723
OPTN	YML061C	1	0.0479097	-0.772725	0.576426	-0.327306
OPTN	YML084W	49	2.34757	-0.652567	0.49947	-0.326629
OPTN	YCR016W	7	0.335368	-0.841883	0.614444	-0.324593
OPTN	YHL008C	10	0.479097	-0.887623	0.63488	-0.324089
OPTN	YER071C	16	0.766555	-0.762173	0.57733	-0.322148
OPTN	YOR277C	2	0.0958194	-0.891199	0.638824	-0.32188
OPTN	YER178W	16	0.766555	-0.828811	0.612795	-0.320919
OPTN	YLR202C	1	0.0479097	-0.684563	0.53127	-0.320875
OPTN	YHR204W	1	0.0479097	-0.769289	0.583519	-0.320394
OPTN	YDR218C	12	0.574916	-0.509644	0.371416	-0.320354
OPTN	YJL126W	8	0.383277	-0.648717	0.506635	-0.320054
OPTN	YNL175C	2	0.0958194	-0.499397	0.362689	-0.318271
OPTN	YOR087W	8	0.383277	-0.711494	0.552924	-0.318092
OPTN	YHR152W	3	0.143729	-0.814516	0.610101	-0.317579
OPTN	YOR208W	4	0.191639	-0.971756	0.673327	-0.317447
OPTN	YLR114C	4	0.191639	-0.78892	0.597921	-0.317208
OPTN	YMR150C	9	0.431187	-0.695304	0.544125	-0.316972
OPTN	YPL121C	9	0.431187	-0.71837	0.560819	-0.315494
OPTN	YNL271C	2	0.0958194	-0.729645	0.56876	-0.314652
OPTN	YDR286C	4	0.191639	-0.62444	0.496361	-0.314492
OPTN	YER033C	15	0.718645	-0.650698	0.517318	-0.31408
OPTN	YDL219W	29	1.38938	-0.852444	0.633603	-0.312333
OPTN	YOL027C	8	0.383277	-0.798951	0.609261	-0.312182
OPTN	YLR190W	2	0.0958194	-0.684408	0.550696	-0.307507
OPTN	YBR195C	1	0.0479097	-0.821318	0.626933	-0.306407
OPTN	YPL070W	3	0.143729	-0.796713	0.619186	-0.3034
OPTN	YAL017W	8	0.383277	-0.822456	0.63273	-0.302063
OPTN	YIR002C	21	1.0061	-0.787565	0.617596	-0.301168
OPTN	YDR068W	287	13.7501	-0.499918	0.397923	-0.300989
OPTN	YBR138C	12	0.574916	-0.750145	0.60163	-0.298835
OPTN	YCR014C	1	0.0479097	-1.14571	0.740019	-0.297862
OPTN	YJR053W	15	0.718645	-0.699587	0.575089	-0.297262
OPTN	YBL080C	5	0.239548	-0.773645	0.616356	-0.296804
OPTN	YDL099W	8	0.383277	-0.779152	0.62166	-0.294784
OPTN	YDL056W	4	0.191639	-0.895285	0.673589	-0.292231
OPTN	YIL170W	55	2.63503	-0.806314	0.638503	-0.29148
OPTN	YOR376W	30	1.43729	-0.775448	0.625511	-0.290397
OPTN	YER109C	34	1.62893	-0.618728	0.532099	-0.289503
OPTN	YBL099W	3	0.143729	-0.721696	0.599087	-0.289338
OPTN	YJR115W	15	0.718645	-0.403665	0.291958	-0.285812
OPTN	YBR214W	4	0.191639	-0.757052	0.623788	-0.284812
OPTN	YDL176W	288	13.798	-0.565896	0.497298	-0.284477
OPTN	YDL222C	151	7.23436	-0.587983	0.516795	-0.284116
OPTN	YMR124W	7	0.335368	-0.689815	0.590226	-0.282668
OPTN	YDR289C	1	0.0479097	-0.862773	0.673	-0.282127
OPTN	YLR041W	78	3.73696	-0.707736	0.602575	-0.281272
OPTN	YBR239C	23	1.10192	-0.721472	0.610768	-0.28082
OPTN	YDL123W	36	1.72475	-0.381999	0.266134	-0.280336
OPTN	YBR174C	4	0.191639	-0.805999	0.653599	-0.279199
OPTN	YNL323W	2	0.0958194	-0.778896	0.641854	-0.278958
OPTN	YAL014C	16	0.766555	-0.709404	0.607898	-0.278159
OPTN	YDR028C	56	2.68294	-0.379655	0.26891	-0.277562
OPTN	YOR064C	30	1.43729	-0.959215	0.711458	-0.276774
OPTN	YNL106C	21	1.0061	-0.675648	0.592352	-0.275427
OPTN	YBR065C	37	1.77266	-0.743107	0.630773	-0.274375
OPTN	YOR068C	13	0.622826	-0.808778	0.661008	-0.274169
OPTN	YNL202W	20	0.958194	-0.398864	0.313053	-0.273999
OPTN	YBR093C	12	0.574916	-0.724206	0.622202	-0.273604
OPTN	YOR003W	29	1.38938	-0.738161	0.630118	-0.273033
OPTN	YML102C-A	3	0.143729	-0.779109	0.652057	-0.271086
OPTN	YLR201C	5	0.239548	-0.842149	0.679356	-0.270031
OPTN	YPL089C	3	0.143729	-0.819607	0.672116	-0.268736
OPTN	YJR025C	8	0.383277	-0.716873	0.627054	-0.267355
OPTN	YIL168W	28	1.34147	-0.667085	0.602367	-0.265255
OPTN	YIR014W	95	4.55142	-0.642395	0.587829	-0.264776
OPTN	YMR223W	26	1.24565	-0.404489	0.353496	-0.261504
OPTN	YDR078C	6	0.287458	-0.691763	0.624504	-0.259754
OPTN	YMR209C	13	0.622826	-0.680636	0.619035	-0.259299
OPTN	YOR316C	48	2.29966	-0.541645	0.523627	-0.258025
OPTN	YEL062W	17	0.814465	-0.62476	0.588964	-0.256799
OPTN	YOR193W	12	0.574916	-0.55303	0.536752	-0.25619
OPTN	YDL231C	72	3.4495	-0.365102	0.299565	-0.25573
OPTN	YLR049C	3	0.143729	-0.734484	0.654455	-0.253797
OPTN	YER185W	30	1.43729	-0.631708	0.599688	-0.25288
OPTN	YPL118W	1	0.0479097	-0.705962	0.642885	-0.25211
OPTN	YJL181W	20	0.958194	-0.801697	0.687241	-0.250738
OPTN	YNL332W	8	0.383277	-0.665962	0.624115	-0.250325
OPTN	YLR099C	15	0.718645	-0.665055	0.626575	-0.248348
OPTN	YBR159W	1	0.0479097	-0.775436	0.680981	-0.247379
OPTN	YBL079W	2	0.0958194	-0.935723	0.737701	-0.245439
OPTN	YDL071C	3	0.143729	-0.65722	0.626554	-0.245436
OPTN	YMR279C	22	1.05401	-0.415923	0.40998	-0.245403
OPTN	YJR050W	12	0.574916	-0.298125	0.189489	-0.241633
OPTN	YML001W	7	0.335368	-0.612526	0.609849	-0.238978
OPTN	YOR327C	333	15.9539	-0.595562	0.60101	-0.237623
OPTN	YDL036C	13	0.622826	-0.779881	0.697291	-0.236077
OPTN	YOR378W	30	1.43729	-0.698301	0.662802	-0.235466
OPTN	YOR154W	5	0.239548	-0.682723	0.655514	-0.235188
OPTN	YMR040W	5	0.239548	-0.813085	0.712058	-0.234121
OPTN	YMR255W	21	1.0061	-0.86835	0.73111	-0.233491
OPTN	YDL094C	10	0.479097	-0.729821	0.680368	-0.233274
OPTN	YDR056C	21	1.0061	-0.685235	0.661118	-0.232214
OPTN	YPL115C	8	0.383277	-0.703934	0.673019	-0.230173	1
OPTN	YOR133W	6	0.287458	-0.587191	0.610373	-0.228785
OPTN	YOR035C	1	0.0479097	-0.983855	0.768677	-0.227589
OPTN	YDR059C	77	3.68905	-0.617514	0.631481	-0.227565
OPTN	YPL133C	29	1.38938	-0.665066	0.659902	-0.226188
OPTN	YDR183W	5	0.239548	-0.632855	0.644417	-0.225032
OPTN	YJR004C	73	3.49741	-0.623077	0.641711	-0.223242
OPTN	YER067W	16	0.766555	-0.768745	0.710345	-0.222671
OPTN	YNL135C	6	0.287458	-0.785667	0.716666	-0.222606
OPTN	YHR115C	1	0.0479097	-0.614255	0.639008	-0.221741
OPTN	YPL258C	7	0.335368	-0.648973	0.658515	-0.221614
OPTN	YLR151C	9	0.431187	-0.626282	0.650057	-0.219163
OPTN	YDR317W	2	0.0958194	-0.703927	0.689288	-0.218719
OPTN	YDR148C	24	1.14983	-0.576083	0.627903	-0.214359
OPTN	YLL042C	27	1.29356	-0.636755	0.663579	-0.214218	0
OPTN	YEL053C	10	0.479097	-0.595818	0.645314	-0.211329
OPTN	YDL049C	12	0.574916	-0.796615	0.735254	-0.210901
OPTN	YCL035C	3	0.143729	-0.670646	0.68647	-0.210268
OPTN	YLR094C	15	0.718645	-0.599885	0.652085	-0.208709
OPTN	YJL060W	76	3.64114	-0.676438	0.69415	-0.206889
OPTN	YNL146W	44	2.10803	-0.632026	0.674559	-0.205687
OPTN	YLL032C	38	1.82057	-0.640893	0.679527	-0.205389
OPTN	YJR134C	40	1.91639	-0.486961	0.589746	-0.199778
OPTN	YPL257W	3	0.143729	-0.723744	0.724145	-0.199649
OPTN	YHR067W	1	0.0479097	-0.900207	0.780376	-0.197707
OPTN	YBR222C	14	0.670736	-0.701738	0.719094	-0.197123
OPTN	YML117W-A	21	1.0061	-0.738498	0.733598	-0.196737
OPTN	YJR008W	17	0.814465	-0.54106	0.63765	-0.196053
OPTN	YNL087W	39	1.86848	-0.596224	0.675268	-0.193613
OPTN	YIL093C	2	0.0958194	-0.855526	0.774731	-0.192724
OPTN	YDL238C	5	0.239548	-0.684633	0.720176	-0.191577
OPTN	YJL046W	1	0.0479097	-1.06126	0.821079	-0.189882
OPTN	YPL174C	2	0.0958194	-0.760167	0.750956	-0.189315
OPTN	YLL033W	1	0.0479097	-0.752563	0.748733	-0.189095
OPTN	YJL024C	4	0.191639	-0.663995	0.71591	-0.188634
OPTN	YBR022W	16	0.766555	-0.593822	0.684227	-0.187513
OPTN	YBR013C	28	1.34147	-0.674803	0.722134	-0.187505
OPTN	YBR064W	31	1.4852	-0.58873	0.684112	-0.185973
OPTN	YHR046C	6	0.287458	-0.69149	0.733162	-0.184516
OPTN	YNL122C	63	3.01831	-0.444916	0.585698	-0.184329
OPTN	YML107C	31	1.4852	-0.862089	0.788161	-0.182624
OPTN	YML124C	2	0.0958194	-0.517743	0.650742	-0.180826
OPTN	YML026C	3	0.143729	-0.636834	0.716328	-0.180652
OPTN	YMR199W	14	0.670736	-0.614388	0.707029	-0.179998
OPTN	YML051W	57	2.73085	-0.623031	0.711454	-0.179773
OPTN	YIL167W	15	0.718645	-0.597661	0.702236	-0.177962
OPTN	YER172C	25	1.19774	-0.483389	0.633493	-0.177165
OPTN	YNL159C	14	0.670736	-0.314624	0.437383	-0.177013
OPTN	YJR044C	1	0.0479097	-0.686801	0.742826	-0.176627
OPTN	YPL033C	10	0.479097	-0.618302	0.715506	-0.175903
OPTN	YDL040C	1	0.0479097	-0.905515	0.805935	-0.175728
OPTN	YMR016C	11	0.527006	-0.35761	0.509951	-0.175246
OPTN	YMR294W-A	6	0.287458	-0.604634	0.710664	-0.174943
OPTN	YHR151C	8	0.383277	-0.593112	0.706869	-0.17386
OPTN	YOR380W	5	0.239548	-0.606614	0.71619	-0.172163
OPTN	YJR060W	2	0.0958194	-0.589584	0.714809	-0.168144
OPTN	YJL098W	28	1.34147	-0.626012	0.734273	-0.166348
OPTN	YMR215W	4	0.191639	-0.686828	0.75786	-0.166308
OPTN	YIL012W	7	0.335368	-0.502447	0.670362	-0.165626
OPTN	YDR055W	19	0.910284	-0.804945	0.797491	-0.163009
OPTN	YDR184C	4	0.191639	-0.789156	0.794041	-0.162534
OPTN	YIL131C	16	0.766555	-0.658164	0.758427	-0.158995
OPTN	YIL158W	12	0.574916	-0.601141	0.740329	-0.156099	0
OPTN	YIL098C	40	1.91639	-0.545911	0.714687	-0.155755
OPTN	YLL027W	1	0.0479097	-0.970304	0.839714	-0.155526
OPTN	YCL049C	24	1.14983	-0.599055	0.741843	-0.15465
OPTN	YAL066W	14	0.670736	-0.651288	0.76391	-0.153763
OPTN	YJL185C	9	0.431187	-0.752263	0.796496	-0.153088
OPTN	YBR197C	7	0.335368	-0.619541	0.753664	-0.152615
OPTN	YBR151W	4	0.191639	-0.622366	0.756013	-0.151849
OPTN	YBR071W	5	0.239548	-0.66503	0.77243	-0.151341
OPTN	YJL169W	11	0.527006	-0.538456	0.727335	-0.146818
OPTN	YJL047C	4	0.191639	-0.684557	0.785637	-0.146743
OPTN	YHL041W	202	9.67776	-0.423435	0.654389	-0.146344
OPTN	YER007W	3	0.143729	-0.527724	0.727629	-0.143737
OPTN	YDR193W	6	0.287458	-0.586868	0.756189	-0.143085
OPTN	YDR262W	2	0.0958194	-0.908205	0.843353	-0.142267
OPTN	YPL006W	2	0.0958194	-0.727513	0.805995	-0.141141
OPTN	YAL022C	13	0.622826	-0.59872	0.764787	-0.140827
OPTN	YOR017W	23	1.10192	-0.584355	0.759216	-0.140703
OPTN	YIL060W	4	0.191639	-0.744755	0.811783	-0.140176
OPTN	YOR379C	24	1.14983	-0.59306	0.765067	-0.13933
OPTN	YBR230C	232	11.115	-0.327783	0.576697	-0.138752
OPTN	YER062C	9	0.431187	-0.649927	0.790767	-0.135986
OPTN	YOR019W	9	0.431187	-0.665198	0.796957	-0.135063
OPTN	YIL009W	91	4.35978	-0.417087	0.676437	-0.134954
OPTN	YLL021W	3	0.143729	-0.602374	0.777583	-0.133978
OPTN	YJR010W	38	1.82057	-0.355098	0.627357	-0.132325
OPTN	YBR146W	1	0.0479097	-0.698007	0.818119	-0.126954
OPTN	YPL104W	1	0.0479097	-0.599865	0.79178	-0.124904
OPTN	YBR073W	8	0.383277	-0.7119	0.825657	-0.124115
OPTN	YDL184C	123	5.89289	-0.726885	0.829515	-0.123923
OPTN	YDR274C	1	0.0479097	-0.761903	0.83942	-0.122347
OPTN	YHR177W	5	0.239548	-0.600535	0.797559	-0.121573
OPTN	YBR248C	50	2.39548	-0.66896	0.820417	-0.120134
OPTN	YDR241W	1	0.0479097	-0.727839	0.835869	-0.119461
OPTN	YPL221W	3	0.143729	-0.393123	0.697599	-0.118881
OPTN	YPL048W	21	1.0061	-0.565563	0.792438	-0.117389
OPTN	YDL025C	3	0.143729	-0.479282	0.758128	-0.115925
OPTN	YBR018C	13	0.622826	-0.592658	0.808355	-0.11358
OPTN	YBR213W	3	0.143729	-0.799008	0.858059	-0.113412
OPTN	YDR313C	7	0.335368	-0.717371	0.842227	-0.113182
OPTN	YLR179C	4	0.191639	-0.587087	0.807511	-0.113008
OPTN	YAL011W	4	0.191639	-0.736078	0.848216	-0.111725
OPTN	YLR165C	15	0.718645	-0.51835	0.786888	-0.110467
OPTN	YDR216W	20	0.958194	-0.198522	0.445224	-0.110135
OPTN	YOR152C	102	4.88679	-0.449429	0.75528	-0.109984
OPTN	YNL230C	7	0.335368	-0.569522	0.80693	-0.109958
OPTN	YNL199C	2	0.0958194	-0.67374	0.837471	-0.109502
OPTN	YOR350C	4	0.191639	-0.55767	0.807636	-0.107275
OPTN	YLR121C	46	2.20385	-0.706783	0.848752	-0.1069
OPTN	YDR134C	38	1.82057	-0.36165	0.717981	-0.101992
OPTN	YMR101C	6	0.287458	-0.661497	0.846091	-0.10181
OPTN	YNL265C	6	0.287458	-0.533301	0.8105	-0.10106	0
OPTN	YEL047C	43	2.06012	-0.566415	0.822497	-0.10054
OPTN	YOL081W	2	0.0958194	-0.671963	0.851635	-0.0996955
OPTN	YCR004C	23	1.10192	-0.665826	0.854093	-0.0971488
OPTN	YJR150C	60	2.87458	-0.478182	0.79709	-0.0970279
OPTN	YIL050W	30	1.43729	-0.36789	0.737946	-0.0964069
OPTN	YOR346W	15	0.718645	-0.536967	0.820956	-0.0961405
OPTN	YMR221C	15	0.718645	-0.615146	0.8448	-0.0954708
OPTN	YLR122C	38	1.82057	-0.466921	0.800664	-0.0930741
OPTN	YDL215C	52	2.4913	-0.512117	0.818472	-0.0929635
OPTN	YDR124W	38	1.82057	-0.529161	0.827113	-0.0914853
OPTN	YOR076C	4	0.191639	-0.727341	0.874518	-0.0912679
OPTN	YOR386W	7	0.335368	-0.734754	0.875805	-0.0912526
OPTN	YOR061W	4	0.191639	-0.491392	0.817158	-0.0898469
OPTN	YPL096W	9	0.431187	-0.621871	0.85581	-0.0896676
OPTN	YMR291W	2	0.0958194	-0.827739	0.891744	-0.089608
OPTN	YNL316C	16	0.766555	-0.569169	0.845687	-0.08783
OPTN	YCR005C	9	0.431187	-0.718823	0.878476	-0.0873545
OPTN	YMR182C	17	0.814465	-0.626453	0.860658	-0.0872909
OPTN	YHR018C	20	0.958194	-0.417236	0.792724	-0.0864828
OPTN	YBR179C	1	0.0479097	-0.749273	0.888148	-0.0838076
OPTN	YJR106W	221	10.588	-0.318827	0.739561	-0.0830349
OPTN	YOR069W	8	0.383277	-0.609339	0.865191	-0.0821442
OPTN	YAL044C	3	0.143729	-0.325975	0.7523	-0.080744
OPTN	YPL236C	3	0.143729	-0.563148	0.858655	-0.0795985
OPTN	YJR140C	5	0.239548	-0.793798	0.900088	-0.0793097
OPTN	YMR246W	11	0.527006	-0.538406	0.854496	-0.0783404
OPTN	YIL159W	17	0.814465	-0.599632	0.870422	-0.0776994
OPTN	YER166W	8	0.383277	-0.665567	0.884894	-0.0766105
OPTN	YMR002W	4	0.191639	-0.725691	0.89494	-0.0762409
OPTN	YCR010C	4	0.191639	-0.643629	0.882695	-0.0755006
OPTN	YDL200C	19	0.910284	-0.466635	0.840274	-0.0745337
OPTN	YOR015W	57	2.73085	-0.489208	0.847873	-0.0744214
OPTN	YOR201C	4	0.191639	-0.722694	0.897197	-0.0742954
OPTN	YML115C	24	1.14983	-0.547261	0.875154	-0.0683235
OPTN	YML048W-A	4	0.191639	-0.285496	0.770641	-0.0654812
OPTN	YAR044W	5	0.239548	-0.638379	0.899545	-0.0641283
OPTN	YPL101W	6	0.287458	-0.706343	0.909377	-0.0640108
OPTN	YHR117W	9	0.431187	-0.586637	0.89113	-0.063867
OPTN	YBR077C	4	0.191639	-0.595525	0.893118	-0.0636508
OPTN	YEL011W	46	2.20385	-0.339966	0.813315	-0.0634666
OPTN	YBR074W	32	1.53311	-0.436908	0.855499	-0.0631336
OPTN	YOL043C	9	0.431187	-0.578792	0.895612	-0.060419
OPTN	YJL123C	14	0.670736	-0.234362	0.742262	-0.0604042
OPTN	YML116W	40	1.91639	-0.544551	0.893738	-0.0578651
OPTN	YDR031W	46	2.20385	-0.316555	0.820724	-0.0567507
OPTN	YMR195W	36	1.72475	-0.635623	0.910939	-0.0566093
OPTN	YPL112C	17	0.814465	-0.336621	0.836262	-0.0551179
OPTN	YBL072C	6	0.287458	-0.446832	0.878845	-0.0541361
OPTN	YJR038C	14	0.670736	-0.629796	0.914284	-0.0539839
OPTN	YAL037W	29	1.38938	-0.175156	0.693466	-0.0536914
OPTN	YDL241W	40	1.91639	-0.479766	0.889739	-0.0528995
OPTN	YJL212C	24	1.14983	-0.504368	0.89643	-0.0522372
OPTN	YOR283W	28	1.34147	-0.511006	0.905174	-0.0484567
OPTN	YBL028C	1	0.0479097	-1.13875	0.957502	-0.0483951
OPTN	YJR040W	10	0.479097	-0.62443	0.925316	-0.0466352
OPTN	YDL229W	55	2.63503	-0.438795	0.894205	-0.0464225
OPTN	YNL083W	36	1.72475	-0.338704	0.865587	-0.0455261
OPTN	YCL074W	71	3.40159	-0.497984	0.910055	-0.0447909
OPTN	YBR148W	27	1.29356	-0.539201	0.918035	-0.0441958
OPTN	YPL141C	25	1.19774	-0.48538	0.910167	-0.0436032
OPTN	YLR089C	7	0.335368	-0.723003	0.9411	-0.0425847
OPTN	YPR005C	2	0.0958194	-0.68016	0.938784	-0.0416365
OPTN	YER148W	14	0.670736	-0.444662	0.907017	-0.0413459
OPTN	YBR255W	10	0.479097	-0.553339	0.92826	-0.0396964
OPTN	YLR128W	43	2.06012	-0.448805	0.91169	-0.0396338
OPTN	YMR152W	45	2.15594	-0.173118	0.773296	-0.0392466
OPTN	YNL139C	1	0.0479097	-0.921763	0.958219	-0.0385125
OPTN	YLR118C	261	12.5044	-0.323716	0.89208	-0.0349353
OPTN	YDL242W	88	4.21605	-0.499763	0.930152	-0.0349075
OPTN	YJL016W	68	3.25786	-0.339532	0.897447	-0.0348199
OPTN	YNL128W	15	0.718645	-0.421851	0.918524	-0.0343709
OPTN	YBR183W	7	0.335368	-0.189755	0.826788	-0.0328679
OPTN	YDR010C	81	3.88068	-0.48774	0.934675	-0.0318615
OPTN	YIL145C	51	2.44339	-0.525565	0.942512	-0.0302136
OPTN	YDR066C	39	1.86848	-0.45087	0.934188	-0.0296727
OPTN	YPL113C	24	1.14983	-0.59997	0.95135	-0.0291886
OPTN	YNL194C	24	1.14983	-0.575749	0.95018	-0.0286837
OPTN	YDL174C	118	5.65334	-0.324368	0.911934	-0.0285659
OPTN	YLR173W	6	0.287458	-0.674388	0.957806	-0.0284551
OPTN	YLL001W	9	0.431187	-0.498648	0.947011	-0.0264231
OPTN	YHL009C	4	0.191639	-0.485025	0.951533	-0.0235079
OPTN	YIL002C	12	0.574916	-0.508653	0.956454	-0.0221497
OPTN	YBR161W	9	0.431187	-0.567447	0.963362	-0.02079
OPTN	YBL081W	2	0.0958194	-0.522418	0.963391	-0.0191253
OPTN	YLR028C	22	1.05401	-0.5353	0.965945	-0.0182294
OPTN	YMR190C	3	0.143729	-0.522223	0.968074	-0.0166727
OPTN	YML013W	3	0.143729	-0.496873	0.969018	-0.0153942
OPTN	YPL241C	5	0.239548	-0.638223	0.976156	-0.0152179
OPTN	YIL090W	14	0.670736	-0.503043	0.970551	-0.0148142
OPTN	YBR233W	18	0.862374	-0.385981	0.961887	-0.014711
OPTN	YER048C	19	0.910284	-0.643201	0.978363	-0.0139171
OPTN	YLR143W	3	0.143729	-0.700985	0.981363	-0.0130646
OPTN	YJL190C	10	0.479097	-0.568733	0.979514	-0.0116512
OPTN	YJL083W	46	2.20385	-0.418525	0.974689	-0.0105935
OPTN	YMR172W	60	2.87458	-0.405635	0.975187	-0.0100652
OPTN	YOR091W	15	0.718645	-0.341403	0.97655	-0.00800583
OPTN	YDR015C	26	1.24565	-0.410545	0.981456	-0.00761332
OPTN	YAL018C	22	1.05401	-0.111625	0.936022	-0.00714159
OPTN	YAL012W	56	2.68294	-0.542674	0.988865	-0.00604288
OPTN	YDR125C	29	1.38938	-0.238283	0.98085	-0.00456302
OPTN	YDR035W	62	2.9704	-0.445792	0.990554	-0.00421082
OPTN	YLR081W	24	1.14983	-0.438051	0.991124	-0.0038883
OPTN	YBR038W	2	0.0958194	-0.658108	0.995071	-0.00324366
OPTN	YDL059C	7	0.335368	-0.565494	0.994567	-0.0030721
OPTN	YPL095C	15	0.718645	-0.679313	0.9964	-0.00244521
BMP15	YNL183C	167	8.92624	-2.92513	0.0329999	-2.8286
BMP15	YOR161C	44	2.35182	-1.91331	0.0372931	-1.84196
BMP15	YLL059C	4	0.213802	-2.12083	0.14349	-1.81651
BMP15	YJL133W	7	0.374154	-2.09406	0.163407	-1.75188
BMP15	YMR004W	3	0.160352	-1.99048	0.150705	-1.69051
BMP15	YMR306W	17	0.908659	-2.04305	0.217671	-1.59834
BMP15	YDL180W	1	0.0534505	-1.64388	0.0311792	-1.59262
BMP15	YJR078W	23	1.22936	-2.07366	0.23684	-1.58253
BMP15	YBR262C	25	1.33626	-2.01327	0.219748	-1.57086
BMP15	YER055C	25	1.33626	-1.68948	0.0708882	-1.56972
BMP15	YER119C	3	0.160352	-1.91184	0.183503	-1.56101
BMP15	YER185W	11	0.587956	-1.81257	0.147211	-1.54574
BMP15	YLR012C	14	0.748307	-1.75876	0.121322	-1.54538
BMP15	YPL246C	7	0.374154	-1.97058	0.223005	-1.53113
BMP15	YER173W	10	0.534505	-1.92044	0.209204	-1.51868
BMP15	YDR185C	5	0.267253	-1.77975	0.163079	-1.48951
BMP15	YJL037W	47	2.51217	-1.85268	0.199423	-1.48321
BMP15	YAR030C	5	0.267253	-1.96091	0.246082	-1.47836
BMP15	YPL162C	1	0.0534505	-1.70739	0.139244	-1.46964
BMP15	YBR217W	38	2.03112	-1.83635	0.204974	-1.45994
BMP15	YDL225W	6	0.320703	-1.64902	0.123646	-1.44513
BMP15	YJL027C	12	0.641406	-1.68814	0.144379	-1.44441
BMP15	YPL249C	6	0.320703	-2.03693	0.293939	-1.4382
BMP15	YJL049W	25	1.33626	-2.0415	0.298182	-1.43276
BMP15	YJR061W	14	0.748307	-1.73395	0.179367	-1.42293
BMP15	YNL194C	11	0.587956	-1.84328	0.229466	-1.42031
BMP15	YMR170C	18	0.96211	-1.65087	0.142999	-1.4148
BMP15	YIL099W	11	0.587956	-1.83794	0.232589	-1.41046
BMP15	YER087C-A	4	0.213802	-1.58616	0.113562	-1.40603
BMP15	YDR055W	10	0.534505	-1.92003	0.275473	-1.39112
BMP15	YMR009W	6	0.320703	-1.78802	0.223315	-1.38873
BMP15	YJL082W	16	0.855208	-1.72862	0.200373	-1.38225
BMP15	YJR120W	4	0.213802	-1.75255	0.223018	-1.3617
BMP15	YJL094C	31	1.65697	-1.96832	0.309586	-1.35896
BMP15	YMR124W	1	0.0534505	-1.55454	0.131083	-1.35077
BMP15	YJR009C	10	0.534505	-1.90904	0.297393	-1.3413
BMP15	YJL190C	3	0.160352	-1.69939	0.21171	-1.33961
BMP15	YER059W	24	1.28281	-1.61961	0.174338	-1.33725
BMP15	YDR247W	1	0.0534505	-1.66046	0.19548	-1.33587
BMP15	YLL039C	1	0.0534505	-1.50037	0.131367	-1.30327
BMP15	YJL118W	26	1.38971	-1.63908	0.20514	-1.30284
BMP15	YCR004C	12	0.641406	-1.76853	0.263572	-1.3024
BMP15	YDL157C	55	2.93978	-1.78062	0.270733	-1.29855
BMP15	YNL068C	8	0.427604	-1.71533	0.246222	-1.29298
BMP15	YDL192W	1	0.0534505	-1.55025	0.167803	-1.29011
BMP15	YLR150W	2	0.106901	-1.69765	0.249995	-1.27324
BMP15	YBR203W	4	0.213802	-1.63824	0.227585	-1.2654
BMP15	YOR285W	20	1.06901	-1.67133	0.243824	-1.26382
BMP15	YER108C	4	0.213802	-1.68791	0.254554	-1.25824
BMP15	YAL028W	5	0.267253	-1.61394	0.221053	-1.25717
BMP15	YDL077C	7	0.374154	-1.48366	0.159748	-1.24665
BMP15	YOR222W	6	0.320703	-1.54227	0.194285	-1.24263
BMP15	YHR061C	1	0.0534505	-1.4769	0.159464	-1.24139
BMP15	YDR102C	10	0.534505	-1.62045	0.234617	-1.24026
BMP15	YOR085W	2	0.106901	-1.53733	0.193488	-1.23987
BMP15	YIL165C	19	1.01556	-1.76546	0.299165	-1.2373
BMP15	YNL092W	26	1.38971	-1.55742	0.206415	-1.23595
BMP15	YMR280C	1	0.0534505	-1.38919	0.112465	-1.23296
BMP15	YER057C	16	0.855208	-1.5403	0.202671	-1.22813
BMP15	YLL007C	36	1.92422	-1.36445	0.100866	-1.22682
BMP15	YHR086W	90	4.81055	-1.6432	0.255183	-1.22388
BMP15	YPL110C	3	0.160352	-1.86302	0.347511	-1.2156
BMP15	YBR174C	1	0.0534505	-1.53367	0.20844	-1.21399
BMP15	YBR187W	3	0.160352	-1.66798	0.273372	-1.212
BMP15	YER020W	3	0.160352	-1.38972	0.135111	-1.20195
BMP15	YCL045C	1	0.0534505	-1.4455	0.168859	-1.20142
BMP15	YDL050C	3	0.160352	-1.6183	0.257941	-1.20087
BMP15	YBR230C	132	7.05547	-1.34758	0.119381	-1.1867
BMP15	YJL144W	5	0.267253	-1.6138	0.266384	-1.18391
BMP15	YHR044C	2	0.106901	-1.48328	0.207786	-1.17507
BMP15	YOR003W	17	0.908659	-1.5761	0.255103	-1.17403
BMP15	YJL023C	2	0.106901	-1.66093	0.293952	-1.17269
BMP15	YHR077C	5	0.267253	-1.6126	0.274881	-1.16933
BMP15	YER051W	1	0.0534505	-1.41507	0.175898	-1.16617
BMP15	YOR288C	33	1.76387	-1.58686	0.266861	-1.16339
BMP15	YJR066W	2	0.106901	-1.62446	0.284789	-1.16183
BMP15	YJR052W	5	0.267253	-1.48973	0.223625	-1.15659
BMP15	YJL177W	3	0.160352	-1.51832	0.243619	-1.14843
BMP15	YMR139W	6	0.320703	-1.84235	0.378888	-1.14431
BMP15	YDL110C	13	0.694857	-1.69195	0.325891	-1.14056
BMP15	YHL003C	30	1.60352	-1.53522	0.258951	-1.13767
BMP15	YER178W	9	0.481055	-1.55681	0.277308	-1.12509
BMP15	YIL119C	5	0.267253	-1.52326	0.262951	-1.12272
BMP15	YDR319C	1	0.0534505	-1.48951	0.247576	-1.12074
BMP15	YNL254C	3	0.160352	-1.5161	0.261624	-1.11945
BMP15	YLR053C	1	0.0534505	-1.37408	0.188	-1.11575
BMP15	YJL170C	30	1.60352	-1.34675	0.171549	-1.11571
BMP15	YEL049W	25	1.33626	-1.46853	0.246191	-1.10699
BMP15	YAL007C	6	0.320703	-1.46189	0.243051	-1.10658
BMP15	YEL010W	15	0.801758	-1.48729	0.256938	-1.10515
BMP15	YCL012W	15	0.801758	-1.52822	0.277228	-1.10455
BMP15	YAL031C	1	0.0534505	-1.35488	0.186303	-1.10246
BMP15	YDL129W	56	2.99323	-1.66221	0.337261	-1.10161
BMP15	YLR218C	3	0.160352	-1.55066	0.2898	-1.10128
BMP15	YOL083W	4	0.213802	-1.54145	0.286211	-1.10027
BMP15	YOR055W	18	0.96211	-1.46943	0.254332	-1.0957
BMP15	YHR046C	2	0.106901	-1.43783	0.240312	-1.0923
BMP15	YJL206C-A	11	0.587956	-1.55124	0.296378	-1.09148
BMP15	YBL064C	10	0.534505	-1.7045	0.360432	-1.09015
BMP15	YMR177W	39	2.08457	-1.58997	0.315284	-1.08868
BMP15	YDR110W	23	1.22936	-1.47783	0.266378	-1.08417
BMP15	YHR133C	2	0.106901	-1.49256	0.281224	-1.07282
BMP15	YOR158W	2	0.106901	-1.3509	0.206815	-1.07151
BMP15	YLR093C	7	0.374154	-1.4689	0.271873	-1.06955
BMP15	YOL071W	9	0.481055	-1.3577	0.212251	-1.06953
BMP15	YDR022C	36	1.92422	-1.53438	0.303922	-1.06805
BMP15	YDR183W	1	0.0534505	-1.30112	0.180662	-1.06606
BMP15	YER058W	2	0.106901	-1.47884	0.279247	-1.06588
BMP15	YIL007C	13	0.694857	-1.32454	0.199702	-1.06003
BMP15	YDL216C	10	0.534505	-1.46127	0.27614	-1.05776
BMP15	YMR319C	13	0.694857	-1.34612	0.218497	-1.052
BMP15	YBL002W	2	0.106901	-1.32579	0.20771	-1.05041
BMP15	YDL200C	8	0.427604	-1.34158	0.218008	-1.0491
BMP15	YMR259C	25	1.33626	-1.39912	0.253039	-1.04509
BMP15	YHL034C	2	0.106901	-1.34894	0.225285	-1.04505
BMP15	YJL116C	27	1.44316	-1.4193	0.264986	-1.04321
BMP15	YLR180W	75	4.00879	-1.33262	0.220664	-1.03856
BMP15	YIL161W	35	1.87077	-1.5159	0.317208	-1.03504
BMP15	YNL057W	23	1.22936	-1.60396	0.355552	-1.03367
BMP15	YMR105C	1	0.0534505	-1.30441	0.207755	-1.03342
BMP15	YNL196C	3	0.160352	-1.36898	0.245213	-1.03329
BMP15	YOR010C	100	5.34505	-1.50465	0.313828	-1.03245
BMP15	YJL053W	5	0.267253	-1.35725	0.2405	-1.03083
BMP15	YDR305C	1	0.0534505	-1.48256	0.307376	-1.02685
BMP15	YLR144C	3	0.160352	-1.39606	0.269354	-1.02003
BMP15	YML123C	15	0.801758	-1.3883	0.26602	-1.01898
BMP15	YER184C	12	0.641406	-1.59239	0.360483	-1.01836
BMP15	YML001W	2	0.106901	-1.25429	0.191795	-1.01372
BMP15	YDR098C	8	0.427604	-1.29655	0.218942	-1.01268
BMP15	YJL192C	3	0.160352	-1.30835	0.229694	-1.00783
BMP15	YPL184C	10	0.534505	-1.30577	0.231062	-1.00405
BMP15	YOR321W	20	1.06901	-1.46303	0.313768	-1.00398
BMP15	YCL048W	2	0.106901	-1.75364	0.427839	-1.00337
BMP15	YIR014W	68	3.63464	-1.36078	0.262885	-1.00305
BMP15	YBR047W	16	0.855208	-1.35694	0.26311	-0.999912
BMP15	YHR136C	5	0.267253	-1.32705	0.248674	-0.997049
BMP15	YPL096W	4	0.213802	-1.3957	0.292218	-0.987853
BMP15	YNL211C	6	0.320703	-1.37624	0.282376	-0.987624
BMP15	YLR108C	1	0.0534505	-1.28427	0.233392	-0.984531
BMP15	YJL197W	3	0.160352	-1.35744	0.276008	-0.982772
BMP15	YML036W	49	2.61908	-1.44846	0.324296	-0.978728
BMP15	YDL201W	21	1.12246	-1.34707	0.273507	-0.97864
BMP15	YJL030W	53	2.83288	-1.37114	0.293492	-0.968722
BMP15	YEL057C	25	1.33626	-1.39925	0.308	-0.968279
BMP15	YAL029C	4	0.213802	-1.31904	0.266428	-0.967614
BMP15	YEL025C	1	0.0534505	-1.27993	0.247221	-0.963501
BMP15	YDR014W	7	0.374154	-1.49562	0.355934	-0.963276
BMP15	YDR033W	38	2.03112	-1.34992	0.286759	-0.962821
BMP15	YDL048C	3	0.160352	-1.39251	0.311168	-0.959203
BMP15	YER186C	5	0.267253	-1.54019	0.377804	-0.958302
BMP15	YJL181W	13	0.694857	-1.45522	0.343299	-0.955644
BMP15	YBR148W	16	0.855208	-1.38359	0.310617	-0.953826
BMP15	YLL030C	24	1.28281	-1.43256	0.335346	-0.95216
BMP15	YOL085C	14	0.748307	-1.24076	0.235308	-0.948798
BMP15	YMR143W	1	0.0534505	-1.44405	0.344647	-0.946364
BMP15	YAR003W	1	0.0534505	-1.21493	0.222526	-0.944575
BMP15	YIL116W	1	0.0534505	-1.18195	0.2011	-0.944257
BMP15	YDL088C	4	0.213802	-1.32845	0.28927	-0.94417
BMP15	YOR053W	19	1.01556	-1.38473	0.319736	-0.941984
BMP15	YLR016C	66	3.52773	-1.20645	0.223764	-0.936491
BMP15	YHR150W	4	0.213802	-1.33358	0.299687	-0.933925
BMP15	YJR117W	619	33.0859	-1.17862	0.207627	-0.933909
BMP15	YBR098W	3	0.160352	-1.50407	0.379615	-0.933105
BMP15	YLR107W	8	0.427604	-1.37117	0.319857	-0.932594
BMP15	YDL109C	18	0.96211	-1.19385	0.219095	-0.932282
BMP15	YCL033C	6	0.320703	-1.29714	0.281824	-0.931573
BMP15	YNL082W	14	0.748307	-1.31836	0.293561	-0.931341
BMP15	YLL026W	9	0.481055	-1.32126	0.295804	-0.930422
BMP15	YPL241C	2	0.106901	-1.37893	0.331151	-0.922298
BMP15	YLR015W	5	0.267253	-1.20814	0.236671	-0.922207
BMP15	YOL036W	12	0.641406	-1.22311	0.24845	-0.91923
BMP15	YOR068C	8	0.427604	-1.38986	0.340508	-0.9166
BMP15	YOR340C	2	0.106901	-1.09749	0.165551	-0.915802
BMP15	YOL048C	2	0.106901	-1.15246	0.206712	-0.914229
BMP15	YNL130C	19	1.01556	-1.18384	0.235431	-0.905129
BMP15	YBR129C	2	0.106901	-1.23654	0.271423	-0.900914
BMP15	YDL176W	224	11.9729	-1.17794	0.235251	-0.900828
BMP15	YJL045W	17	0.908659	-1.3649	0.340242	-0.900506
BMP15	YEL039C	12	0.641406	-1.36653	0.349821	-0.888489
BMP15	YBR040W	5	0.267253	-1.2997	0.316555	-0.888275
BMP15	YPL084W	1	0.0534505	-1.3129	0.323543	-0.888122
BMP15	YDL133W	24	1.28281	-1.2675	0.3013	-0.8856
BMP15	YMR023C	1	0.0534505	-1.14464	0.2292	-0.882285
BMP15	YJL036W	15	0.801758	-1.25894	0.30153	-0.879334
BMP15	YER165C-A	5	0.267253	-1.30623	0.329426	-0.875926
BMP15	YLL015W	5	0.267253	-1.18294	0.262994	-0.87183
BMP15	YOL057W	13	0.694857	-1.2029	0.275737	-0.871215
BMP15	YML118W	3	0.160352	-1.22041	0.286207	-0.871117
BMP15	YIL166C	4	0.213802	-1.24495	0.30164	-0.869425
BMP15	YPL077C	1	0.0534505	-1.39875	0.380282	-0.866831
BMP15	YIL011W	7	0.374154	-1.19587	0.277418	-0.864112
BMP15	YIL069C	13	0.694857	-1.30452	0.339361	-0.861816
BMP15	YBL099W	1	0.0534505	-1.16212	0.259767	-0.860237
BMP15	YOR142W	8	0.427604	-1.01706	0.156591	-0.857801
BMP15	YNL305C	30	1.60352	-1.26752	0.324499	-0.856212
BMP15	YER096W	42	2.24492	-1.41086	0.393425	-0.855791
BMP15	YNL078W	71	3.79499	-1.2434	0.316776	-0.849521
BMP15	YIL123W	1	0.0534505	-0.996738	0.150898	-0.846332
BMP15	YLR119W	24	1.28281	-1.34553	0.372728	-0.844011
BMP15	YMR223W	6	0.320703	-0.92018	0.0924194	-0.835138
BMP15	YIL163C	17	0.908659	-1.30741	0.361572	-0.834687
BMP15	YOR105W	3	0.160352	-1.19359	0.301295	-0.833967
BMP15	YBR255W	5	0.267253	-1.24624	0.331931	-0.832573
BMP15	YMR171C	14	0.748307	-1.27833	0.352512	-0.827705
BMP15	YCL035C	1	0.0534505	-1.1447	0.277507	-0.827037
BMP15	YAL014C	10	0.534505	-1.21138	0.317389	-0.826898
BMP15	YPL202C	2	0.106901	-1.09671	0.24837	-0.824321
BMP15	YLR173W	3	0.160352	-1.34485	0.38825	-0.822712
BMP15	YOL072W	1	0.0534505	-1.15345	0.288329	-0.820878
BMP15	YLR219W	3	0.160352	-1.18776	0.314443	-0.814276
BMP15	YDR034C	3	0.160352	-1.08621	0.251481	-0.813052
BMP15	YLR114C	2	0.106901	-1.18327	0.324533	-0.799257
BMP15	YJL065C	10	0.534505	-1.25719	0.367007	-0.795792
BMP15	YML070W	21	1.12246	-1.32997	0.404281	-0.79229
BMP15	YHR155W	9	0.481055	-1.35285	0.415891	-0.790211
BMP15	YDL146W	3	0.160352	-1.25979	0.375365	-0.786907
BMP15	YPL127C	4	0.213802	-1.20334	0.346225	-0.786714
BMP15	YIL066C	72	3.84844	-1.21848	0.355126	-0.785768
BMP15	YDL053C	6	0.320703	-1.18745	0.339466	-0.784349
BMP15	YNL119W	1	0.0534505	-1.11423	0.298075	-0.78211
BMP15	YHL002W	79	4.22259	-1.20389	0.350375	-0.782078
BMP15	YAL023C	2	0.106901	-1.07415	0.272472	-0.781473
BMP15	YER062C	5	0.267253	-1.21426	0.35768	-0.779944
BMP15	YPL054W	36	1.92422	-1.22208	0.362298	-0.779323
BMP15	YNL097C	10	0.534505	-1.15506	0.325405	-0.779198
BMP15	YOR226C	2	0.106901	-1.21737	0.361706	-0.777042
BMP15	YJL126W	4	0.213802	-1.04096	0.255758	-0.774723
BMP15	YMR119W-A	14	0.748307	-1.16235	0.334624	-0.773402
BMP15	YNL339C	14	0.748307	-1.21401	0.369195	-0.765804
BMP15	YNL145W	43	2.29837	-1.19962	0.361959	-0.765408
BMP15	YCR001W	1	0.0534505	-1.21038	0.368332	-0.764558
BMP15	YMR118C	15	0.801758	-0.971319	0.21408	-0.763379
BMP15	YOL029C	2	0.106901	-1.23731	0.38305	-0.763358
BMP15	YOL061W	8	0.427604	-0.982335	0.224418	-0.761881
BMP15	YOR325W	66	3.52773	-1.10624	0.311452	-0.761699
BMP15	YNL066W	47	2.51217	-1.15172	0.341511	-0.758397
BMP15	YBL072C	2	0.106901	-1.02553	0.260743	-0.758133
BMP15	YIL059C	52	2.77943	-1.32232	0.427384	-0.757179
BMP15	YPL191C	7	0.374154	-1.33003	0.431324	-0.756358
BMP15	YNL065W	24	1.28281	-1.08284	0.303345	-0.754363
BMP15	YEL013W	3	0.160352	-1.11913	0.327072	-0.753092
BMP15	YCL024W	2	0.106901	-1.08393	0.305545	-0.752741
BMP15	YMR174c	11	0.587956	-1.17475	0.359421	-0.752523
BMP15	YNL176C	10	0.534505	-1.20392	0.375508	-0.75184
BMP15	YHL045W	36	1.92422	-1.05039	0.284244	-0.75182
BMP15	YJR051W	38	2.03112	-1.18832	0.367416	-0.751714
BMP15	YCL011C	2	0.106901	-1.03501	0.27742	-0.747881
BMP15	YHR195W	4	0.213802	-1.14157	0.345008	-0.747719
BMP15	YHR109W	1	0.0534505	-1.018	0.267139	-0.746056
BMP15	YPL014W	7	0.374154	-1.17625	0.366587	-0.745052
BMP15	YNL140C	23	1.22936	-1.05254	0.292966	-0.744183
BMP15	YOR384W	12	0.641406	-1.2203	0.391041	-0.743116
BMP15	YJR098C	248	13.2557	-0.870119	0.150144	-0.739476
BMP15	YNL278W	1	0.0534505	-1.1261	0.344558	-0.738092
BMP15	YIL158W	7	0.374154	-1.12	0.343114	-0.735716
BMP15	YOR031W	13	0.694857	-1.16339	0.367662	-0.735658
BMP15	YCR019W	21	1.12246	-1.0554	0.308722	-0.729578
BMP15	YAL013W	1	0.0534505	-1.20231	0.394636	-0.727833
BMP15	YLR151C	5	0.267253	-1.07119	0.321793	-0.726489
BMP15	YJR154W	21	1.12246	-1.02853	0.296459	-0.723612
BMP15	YJL042W	597	31.91	-1.03452	0.301606	-0.722504
BMP15	YOR318C	15	0.801758	-1.23508	0.415613	-0.721766
BMP15	YMR238W	9	0.481055	-1.21148	0.405485	-0.720241
BMP15	YML110C	4	0.213802	-1.21541	0.407962	-0.719568
BMP15	YPL120W	9	0.481055	-1.13127	0.365924	-0.717309
BMP15	YEL024W	1	0.0534505	-1.25658	0.433753	-0.711536
BMP15	YJR008W	10	0.534505	-1.01044	0.296356	-0.710993
BMP15	YOL043C	5	0.267253	-1.14758	0.38184	-0.709387
BMP15	YMR278W	17	0.908659	-1.01895	0.305753	-0.707405
BMP15	YIL077C	10	0.534505	-1.12804	0.373534	-0.70668
BMP15	YML030W	20	1.06901	-1.03537	0.318609	-0.705492
BMP15	YOL007C	3	0.160352	-1.17321	0.399057	-0.705034
BMP15	YHR012W	3	0.160352	-1.0873	0.352301	-0.704241
BMP15	YHR138C	10	0.534505	-1.12193	0.374715	-0.701528
BMP15	YDR072C	7	0.374154	-1.28188	0.454128	-0.699742
BMP15	YHR080C	26	1.38971	-1.17799	0.406958	-0.698594
BMP15	YPL144W	7	0.374154	-1.11911	0.376628	-0.697621
BMP15	YML096W	14	0.748307	-1.25742	0.446311	-0.69622
BMP15	YDL091C	4	0.213802	-1.09558	0.365496	-0.695149
BMP15	YIL160C	23	1.22936	-1.19373	0.417679	-0.695135
BMP15	YER030W	36	1.92422	-1.1469	0.395218	-0.693626
BMP15	YJR043C	5	0.267253	-1.06259	0.349413	-0.691304
BMP15	YBL044W	2	0.106901	-1.16082	0.407723	-0.687529
BMP15	YJL089W	24	1.28281	-1.21034	0.432401	-0.686989
BMP15	YEL017C-A	3	0.160352	-1.01013	0.32087	-0.686012
BMP15	YCL047C	3	0.160352	-1.15111	0.404423	-0.685577
BMP15	YMR187C	23	1.22936	-1.19663	0.428224	-0.684207
BMP15	YMR262W	19	1.01556	-1.0743	0.363641	-0.683642
BMP15	YMR041C	24	1.28281	-1.07743	0.365863	-0.683239
BMP15	YBR219C	11	0.587956	-1.18575	0.424202	-0.68275
BMP15	YIL162W	22	1.17591	-1.12605	0.396068	-0.680057
BMP15	YPL129W	1	0.0534505	-1.05216	0.353727	-0.679982
BMP15	YMR304C-A	36	1.92422	-1.08245	0.372146	-0.679619
BMP15	YAR047C	2	0.106901	-0.948338	0.283699	-0.679295
BMP15	YPL132W	10	0.534505	-1.11985	0.396045	-0.676338
BMP15	YDR284C	1	0.0534505	-1.02062	0.338598	-0.675039
BMP15	YHR015W	9	0.481055	-1.24943	0.45992	-0.674792
BMP15	YOR118W	13	0.694857	-0.875525	0.231976	-0.672425
BMP15	YDR149C	2	0.106901	-1.0437	0.357957	-0.670103
BMP15	YHR125W	5	0.267253	-1.08354	0.38168	-0.669974
BMP15	YNL264C	16	0.855208	-1.05852	0.367767	-0.669232
BMP15	YNL255C	47	2.51217	-1.15359	0.420011	-0.669071
BMP15	YOR090C	29	1.55007	-1.0274	0.349213	-0.668617
BMP15	YDR136C	2	0.106901	-1.02103	0.345302	-0.668468
BMP15	YJR121W	1	0.0534505	-1.04869	0.363324	-0.667674
BMP15	YNL054W	1	0.0534505	-1.27615	0.478273	-0.665803
BMP15	YOR300W	126	6.73477	-1.01322	0.34457	-0.664098
BMP15	YOR347C	23	1.22936	-0.988073	0.328308	-0.66368
BMP15	YDR198C	7	0.374154	-1.16897	0.43263	-0.663241
BMP15	YLR210W	7	0.374154	-1.1017	0.399116	-0.661995
BMP15	YDL177C	80	4.27604	-1.01254	0.347442	-0.660742
BMP15	YOR165W	4	0.213802	-1.21372	0.455965	-0.660309
BMP15	YPL214C	3	0.160352	-1.06874	0.3827	-0.659731
BMP15	YPL037C	2	0.106901	-1.24561	0.4731	-0.656311
BMP15	YOR166C	24	1.28281	-1.23092	0.468882	-0.653765
BMP15	YDR099W	8	0.427604	-0.921548	0.29108	-0.653304
BMP15	YER007W	1	0.0534505	-0.919495	0.291134	-0.651799
BMP15	YHR028C	85	4.5433	-0.951749	0.315677	-0.651304
BMP15	YHL027W	21	1.12246	-1.0673	0.390005	-0.651046
BMP15	YNL333W	7	0.374154	-1.04965	0.381173	-0.649554
BMP15	YHR103W	3	0.160352	-1.22426	0.471217	-0.647367
BMP15	YNL304W	15	0.801758	-1.0371	0.380941	-0.642029
BMP15	YBL094C	3	0.160352	-1.20735	0.469259	-0.640792
BMP15	YIL101C	1	0.0534505	-1.40619	0.545593	-0.638981
BMP15	YOR092W	13	0.694857	-1.04341	0.391753	-0.634652
BMP15	YOR368W	11	0.587956	-1.05787	0.401287	-0.633359
BMP15	YNL336W	31	1.65697	-1.05934	0.402386	-0.633075
BMP15	YBR101C	96	5.13125	-0.982365	0.35945	-0.629253
BMP15	YMR150C	6	0.320703	-0.974685	0.356377	-0.627329
BMP15	YJL178C	1	0.0534505	-0.732093	0.143854	-0.626779
BMP15	YMR275C	15	0.801758	-1.02209	0.387715	-0.62581
BMP15	YJR056C	19	1.01556	-0.986204	0.372154	-0.619184
BMP15	YDL130W	11	0.587956	-0.912313	0.32258	-0.618019
BMP15	YJL152W	8	0.427604	-1.15176	0.465808	-0.615262
BMP15	YCL063W	2	0.106901	-1.06078	0.422489	-0.612613
BMP15	YNL120C	1	0.0534505	-0.865041	0.292368	-0.612131
BMP15	YHR129C	2	0.106901	-1.02391	0.40257	-0.611716
BMP15	YPL116W	16	0.855208	-0.866247	0.295916	-0.60991
BMP15	YCL026C	11	0.587956	-1.1712	0.480155	-0.608842
BMP15	YJL123C	3	0.160352	-0.707657	0.141379	-0.607609
BMP15	YOR154W	3	0.160352	-0.999488	0.392391	-0.607298
BMP15	YLL060C	24	1.28281	-0.926513	0.346993	-0.60502
BMP15	YNL270C	5	0.267253	-1.02128	0.407766	-0.604835
BMP15	YJL164C	6	0.320703	-1.08427	0.44425	-0.60258
BMP15	YPL023C	11	0.587956	-0.963455	0.376033	-0.601164
BMP15	YMR306C-A	26	1.38971	-1.01131	0.405742	-0.600979
BMP15	YDL025C	1	0.0534505	-0.851862	0.295754	-0.59992
BMP15	YLR179C	2	0.106901	-0.984741	0.391249	-0.599462
BMP15	YCL030C	1	0.0534505	-0.936999	0.364045	-0.595889
BMP15	YJR131W	13	0.694857	-0.822204	0.278074	-0.593571
BMP15	YPL222W	8	0.427604	-0.935395	0.365483	-0.593523
BMP15	YPL006W	1	0.0534505	-1.07086	0.447936	-0.591182
BMP15	YOR348C	16	0.855208	-0.998633	0.408972	-0.590221
BMP15	YML059C	16	0.855208	-0.980433	0.399036	-0.589205
BMP15	YLR085C	4	0.213802	-0.998682	0.410553	-0.58867
BMP15	YOR093C	10	0.534505	-0.987707	0.404671	-0.588011
BMP15	YDR312W	1	0.0534505	-1.01198	0.42018	-0.586768
BMP15	YNL108C	41	2.19147	-1.13511	0.484685	-0.584937
BMP15	YBL061C	6	0.320703	-0.969755	0.39772	-0.584063
BMP15	YJR135C	8	0.427604	-0.903438	0.360439	-0.577804
BMP15	YIL130W	3	0.160352	-0.862098	0.330633	-0.57706
BMP15	YOR328W	42	2.24492	-1.09194	0.47356	-0.574844
BMP15	YIL096C	27	1.44316	-1.03278	0.444489	-0.573719
BMP15	YNL197C	1	0.0534505	-0.908886	0.369501	-0.573052
BMP15	YDL067C	3	0.160352	-1.03791	0.447952	-0.572974
BMP15	YLR205C	9	0.481055	-0.999457	0.428193	-0.571496
BMP15	YBR241C	24	1.28281	-1.10366	0.482865	-0.570741
BMP15	YDR271C	3	0.160352	-1.1626	0.509666	-0.570061
BMP15	YNL291C	4	0.213802	-1.05517	0.460022	-0.569768
BMP15	YLR032W	5	0.267253	-1.00627	0.434786	-0.568755
BMP15	YDL078C	9	0.481055	-1.13512	0.499138	-0.568538
BMP15	YBL043W	1	0.0534505	-0.985977	0.424919	-0.567017
BMP15	YOR333C	35	1.87077	-1.09758	0.483433	-0.566973
BMP15	YJL149W	1	0.0534505	-0.947038	0.40241	-0.565941
BMP15	YJL180C	1	0.0534505	-1.02016	0.445911	-0.565259
BMP15	YNL257C	50	2.67253	-1.09593	0.485066	-0.564332
BMP15	YJL159W	3	0.160352	-0.998337	0.434868	-0.564192
BMP15	YDR131C	14	0.748307	-1.01606	0.449533	-0.559308
BMP15	YHL036W	2	0.106901	-0.970535	0.423763	-0.559258
BMP15	YMR318C	28	1.49661	-0.916147	0.392925	-0.55617
BMP15	YNL316C	11	0.587956	-1.00301	0.446343	-0.555324
BMP15	YAR035W	4	0.213802	-0.929623	0.403231	-0.55477
BMP15	YJR026W	10	0.534505	-1.20555	0.540715	-0.553692
BMP15	YER145C-A	18	0.96211	-1.13848	0.516592	-0.550349
BMP15	YBR244W	95	5.0778	-1.03113	0.466284	-0.550332
BMP15	YDL137W	204	10.9039	-1.00373	0.453978	-0.54806
BMP15	YOR067C	9	0.481055	-1.13789	0.519269	-0.547018
BMP15	YOR114W	21	1.12246	-0.789683	0.308274	-0.546244
BMP15	YHR050W	1	0.0534505	-1.23659	0.559133	-0.54517
BMP15	YOL081W	1	0.0534505	-1.01063	0.460699	-0.545032
BMP15	YHR114W	3	0.160352	-0.949762	0.428439	-0.542847
BMP15	YBL024W	42	2.24492	-0.937444	0.42312	-0.540793
BMP15	YNL335W	54	2.88633	-0.994955	0.457014	-0.540246
BMP15	YMR008C	26	1.38971	-0.969631	0.443233	-0.539858
BMP15	YMR191W	30	1.60352	-0.943261	0.428738	-0.538849
BMP15	YPR005C	1	0.0534505	-1.05822	0.490818	-0.538828
BMP15	YER038W-A	16	0.855208	-0.879564	0.388757	-0.537628
BMP15	YDL188C	36	1.92422	-0.93163	0.424056	-0.536567
BMP15	YEL047C	33	1.76387	-0.992008	0.45965	-0.536032
BMP15	YMR163C	4	0.213802	-0.914964	0.415148	-0.535118
BMP15	YNL279W	345	18.4404	-0.813536	0.343432	-0.534142
BMP15	YNL101W	45	2.40527	-0.854696	0.376737	-0.5327
BMP15	YOL082W	10	0.534505	-1.06875	0.501598	-0.532666
BMP15	YBL059W	6	0.320703	-0.92927	0.427354	-0.532143
BMP15	YPL002C	2	0.106901	-1.04567	0.493061	-0.530092
BMP15	YBL086C	50	2.67253	-0.951486	0.445946	-0.527174
BMP15	YHL012W	9	0.481055	-0.964725	0.453679	-0.527049
BMP15	YOR039W	4	0.213802	-0.939052	0.439568	-0.526275
BMP15	YER123W	8	0.427604	-0.940959	0.440866	-0.526122
BMP15	YPL035C	4	0.213802	-1.08359	0.514933	-0.525615
BMP15	YER169W	5	0.267253	-0.903188	0.41834	-0.525348
BMP15	YER119C-A	19	1.01556	-0.893881	0.413366	-0.524381
BMP15	YDL099W	6	0.320703	-0.993517	0.472419	-0.524161
BMP15	YOR188W	31	1.65697	-1.0575	0.505521	-0.522909
BMP15	YDL142C	68	3.63464	-0.881977	0.40741	-0.522651
BMP15	YBR150C	12	0.641406	-0.941402	0.449226	-0.5185
BMP15	YMR316W	19	1.01556	-0.968809	0.465356	-0.517968
BMP15	YOR017W	17	0.908659	-0.944678	0.451774	-0.517897
BMP15	YHR177W	3	0.160352	-0.93808	0.448029	-0.517792
BMP15	YLR123C	14	0.748307	-0.90161	0.42601	-0.517515
BMP15	YBR164C	1	0.0534505	-0.978231	0.471117	-0.51737
BMP15	YAL048C	1	0.0534505	-0.947801	0.454897	-0.516649
BMP15	YHL021C	2	0.106901	-0.920801	0.443537	-0.512392
BMP15	YER063W	39	2.08457	-1.16597	0.56103	-0.511826
BMP15	YIL013C	9	0.481055	-0.903375	0.434889	-0.510507
BMP15	YML017W	57	3.04668	-1.03054	0.505211	-0.509899
BMP15	YOR301W	5	0.267253	-0.867657	0.412648	-0.50962
BMP15	YHR009C	56	2.99323	-0.896144	0.431869	-0.509127
BMP15	YHL008C	8	0.427604	-1.07145	0.524935	-0.509006
BMP15	YPL018W	1	0.0534505	-1.26415	0.599475	-0.506326
BMP15	YNL052W	23	1.22936	-1.02525	0.50819	-0.50423
BMP15	YHL009C	2	0.106901	-0.876452	0.425439	-0.503575
BMP15	YDR205W	13	0.694857	-0.689425	0.270687	-0.502807
BMP15	YMR206W	21	1.12246	-1.04276	0.517868	-0.502749
BMP15	YIL079C	2	0.106901	-0.964905	0.479197	-0.502525
BMP15	YDR337W	1	0.0534505	-1.15691	0.568899	-0.498745
BMP15	YDR085C	12	0.641406	-0.965744	0.487403	-0.495037
BMP15	YER114C	3	0.160352	-1.01259	0.511904	-0.494242
BMP15	YLR049C	2	0.106901	-0.936386	0.472623	-0.493828
BMP15	YJL188C	1	0.0534505	-0.853125	0.423532	-0.491799
BMP15	YLR094C	11	0.587956	-0.864697	0.433804	-0.489589
BMP15	YML102W	27	1.44316	-0.840257	0.41742	-0.489517
BMP15	YIL098C	31	1.65697	-0.869659	0.441106	-0.486048
BMP15	YNL116W	8	0.427604	-0.918123	0.473577	-0.483321
BMP15	YNL160W	5	0.267253	-0.929933	0.481444	-0.482222
BMP15	YIL114C	7	0.374154	-0.83762	0.424732	-0.481856
BMP15	YOR043W	18	0.96211	-0.858586	0.441753	-0.479303
BMP15	YIL036W	1	0.0534505	-0.97315	0.510011	-0.476833
BMP15	YBR099C	2	0.106901	-0.999488	0.523161	-0.476595
BMP15	YDR219C	2	0.106901	-0.970544	0.509386	-0.476163
BMP15	YOR313C	14	0.748307	-0.846682	0.437937	-0.475889
BMP15	YDL125C	3	0.160352	-0.840975	0.436039	-0.474278
BMP15	YLR183C	3	0.160352	-0.963778	0.509017	-0.473199
BMP15	YPL135W	9	0.481055	-0.820705	0.423589	-0.473064
BMP15	YOR042W	21	1.12246	-0.81819	0.422861	-0.472209
BMP15	YOR133W	4	0.213802	-0.801584	0.411124	-0.472034
BMP15	YDR046C	56	2.99323	-1.02677	0.542738	-0.469505
BMP15	YDL138W	181	9.67455	-0.612415	0.234366	-0.468886
BMP15	YHR035W	87	4.6502	-0.926106	0.494347	-0.468288
BMP15	YBL106C	5	0.267253	-0.938153	0.500961	-0.468176
BMP15	YBR246W	16	0.855208	-0.858306	0.456772	-0.466255
BMP15	YOR136W	1	0.0534505	-0.84875	0.450846	-0.466094
BMP15	YIR003W	308	16.4628	-0.646181	0.278906	-0.465958
BMP15	YJR103W	13	0.694857	-0.947808	0.510404	-0.464042
BMP15	YML119W	29	1.55007	-1.007	0.546301	-0.456876
BMP15	YBL019W	3	0.160352	-0.987057	0.537517	-0.456497
BMP15	YHR207C	4	0.213802	-0.765515	0.404124	-0.456152
BMP15	YOR066W	10	0.534505	-0.868058	0.474887	-0.455829
BMP15	YPL057C	2	0.106901	-1.01745	0.552777	-0.455029
BMP15	YCL038C	25	1.33626	-0.797652	0.432476	-0.452687
BMP15	YDL071C	2	0.106901	-0.828024	0.458885	-0.448056
BMP15	YLR225C	14	0.748307	-0.865079	0.488361	-0.442609
BMP15	YIL044C	2	0.106901	-0.874332	0.496138	-0.440543
BMP15	YML124C	1	0.0534505	-0.713805	0.387314	-0.437338
BMP15	YPL025C	4	0.213802	-0.844145	0.48355	-0.435959
BMP15	YHL029C	8	0.427604	-0.966299	0.550347	-0.434499
BMP15	YJR147W	86	4.59675	-0.721133	0.399931	-0.43273
BMP15	YML067C	2	0.106901	-0.836282	0.483555	-0.431893
BMP15	YLL012W	29	1.55007	-0.978079	0.560343	-0.430019
BMP15	YPL179W	43	2.29837	-0.869661	0.505906	-0.429695
BMP15	YMR183C	5	0.267253	-0.856282	0.498214	-0.429671
BMP15	YOR049C	3	0.160352	-0.791027	0.457251	-0.429329
BMP15	YER129W	10	0.534505	-1.0024	0.573786	-0.427236
BMP15	YBL042C	1	0.0534505	-0.961253	0.555714	-0.427071
BMP15	YBR222C	11	0.587956	-0.926443	0.539081	-0.427015
BMP15	YOR113W	4	0.213802	-0.851856	0.498952	-0.426821
BMP15	YDL069C	8	0.427604	-1.10076	0.612918	-0.426083
BMP15	YDR003W	13	0.694857	-0.903189	0.528358	-0.425982
BMP15	YLR013W	23	1.22936	-0.797563	0.469675	-0.422967
BMP15	YLR211C	13	0.694857	-0.795218	0.468697	-0.422502
BMP15	YHL005C	8	0.427604	-0.784864	0.461785	-0.422426
BMP15	YBR113W	1	0.0534505	-0.995071	0.576418	-0.421494
BMP15	YBR178W	8	0.427604	-0.78035	0.461529	-0.420196
BMP15	YHR144C	1	0.0534505	-0.819088	0.490162	-0.417602
BMP15	YDL020C	1	0.0534505	-0.978395	0.574906	-0.41591
BMP15	YDL001W	4	0.213802	-0.732633	0.434058	-0.414627
BMP15	YLL043W	12	0.641406	-0.888223	0.534169	-0.413762
BMP15	YBR030W	10	0.534505	-0.782048	0.474924	-0.410634
BMP15	YAL044C	1	0.0534505	-0.579147	0.291333	-0.410423
BMP15	YDR265W	19	1.01556	-0.929965	0.559997	-0.409187
BMP15	YDR294C	5	0.267253	-1.1088	0.631637	-0.40844
BMP15	YJL077C	67	3.58119	-0.874379	0.533665	-0.407753
BMP15	YIL072W	2	0.106901	-0.9027	0.549011	-0.407108
BMP15	YBL080C	4	0.213802	-0.882653	0.539202	-0.406725
BMP15	YML107C	26	1.38971	-1.0972	0.631867	-0.403916
BMP15	YOR106W	1	0.0534505	-0.886224	0.544575	-0.403609
BMP15	YOL075C	4	0.213802	-0.749547	0.462174	-0.403126
BMP15	YJR146W	3291	175.906	-0.546185	0.262018	-0.403074
BMP15	YOR205C	1	0.0534505	-0.782899	0.485207	-0.403031
BMP15	YPL066W	3	0.160352	-0.871597	0.539224	-0.401611
BMP15	YHR209W	7	0.374154	-0.803814	0.505142	-0.397774
BMP15	YPL247C	3	0.160352	-0.735752	0.461153	-0.396458
BMP15	YPL058C	5	0.267253	-0.930881	0.574998	-0.395626
BMP15	YDL178W	49	2.61908	-0.907075	0.568742	-0.391184
BMP15	YJR030C	12	0.641406	-0.952866	0.593241	-0.387587
BMP15	YDL039C	22	1.17591	-0.890967	0.56822	-0.384702
BMP15	YER060W	17	0.908659	-0.767394	0.498867	-0.384566
BMP15	YBR072W	25	1.33626	-0.89838	0.572582	-0.383984
BMP15	YER037W	3	0.160352	-0.720762	0.472355	-0.380306
BMP15	YDR184C	3	0.160352	-0.985298	0.61625	-0.378108
BMP15	YOR180C	21	1.12246	-0.777511	0.516907	-0.37561
BMP15	YNL318C	12	0.641406	-0.859164	0.563613	-0.374928
BMP15	YHR017W	9	0.481055	-0.850846	0.562615	-0.372147
BMP15	YDL204W	47	2.51217	-0.799547	0.535243	-0.371595
BMP15	YBR093C	10	0.534505	-0.82955	0.55244	-0.371274
BMP15	YMR164C	25	1.33626	-0.881103	0.579199	-0.370769
BMP15	YER109C	29	1.55007	-0.708476	0.477866	-0.36992
BMP15	YEL028W	28	1.49661	-0.805109	0.541139	-0.369433
BMP15	YIL050W	22	1.17591	-0.629427	0.413336	-0.369262
BMP15	YLL021W	2	0.106901	-0.800078	0.538529	-0.369213
BMP15	YBR145W	12	0.641406	-0.875999	0.578822	-0.368951
BMP15	YJL210W	13	0.694857	-0.854928	0.569954	-0.367658
BMP15	YBL006C	1	0.0534505	-1.06261	0.655953	-0.365589
BMP15	YOR239W	4	0.213802	-0.749168	0.512059	-0.36555
BMP15	YER147C	1	0.0534505	-0.751421	0.514684	-0.364677
BMP15	YOL050C	5	0.267253	-0.945636	0.614456	-0.364584
BMP15	YLR041W	68	3.63464	-0.807631	0.548737	-0.364454
BMP15	YOR131C	2	0.106901	-0.933238	0.612493	-0.361636
BMP15	YDR090C	22	1.17591	-0.759548	0.524056	-0.361503
BMP15	YLR143W	2	0.106901	-0.992772	0.636825	-0.36055
BMP15	YMR153C-A	36	1.92422	-0.689476	0.477383	-0.360332
BMP15	YEL030W	6	0.320703	-0.816523	0.56001	-0.359262
BMP15	YER148W	10	0.534505	-0.740434	0.515807	-0.358513
BMP15	YHR094C	1	0.0534505	-0.919763	0.611905	-0.356955
BMP15	YHR004C	5	0.267253	-0.725572	0.509736	-0.355722
BMP15	YML042W	28	1.49661	-0.856684	0.584906	-0.355604
BMP15	YJR001W	23	1.22936	-0.903187	0.60704	-0.354916
BMP15	YER028C	24	1.28281	-0.777099	0.543614	-0.354657
BMP15	YOL059W	5	0.267253	-0.923184	0.615918	-0.354578
BMP15	YNL324W	3	0.160352	-0.40669	0.129421	-0.354055
BMP15	YJL146W	10	0.534505	-0.884103	0.600022	-0.353622
BMP15	YPL206C	8	0.427604	-0.867267	0.594343	-0.351813
BMP15	YJL013C	6	0.320703	-0.690966	0.491768	-0.351171
BMP15	YML113W	8	0.427604	-0.667369	0.474243	-0.350874
BMP15	YHR076W	8	0.427604	-0.699037	0.499024	-0.350201
BMP15	YIL060W	3	0.160352	-0.933718	0.627475	-0.347834
BMP15	YNL090W	40	2.13802	-0.927455	0.626708	-0.346212
BMP15	YMR215W	3	0.160352	-0.849603	0.593699	-0.345195
BMP15	YBL047C	1	0.0534505	-0.721141	0.525009	-0.342536
BMP15	YNL295W	16	0.855208	-0.705718	0.517905	-0.340223
BMP15	YML009c	214	11.4384	-0.685975	0.504747	-0.339731
BMP15	YOR062C	48	2.56563	-0.636053	0.466602	-0.339269
BMP15	YCR005C	7	0.374154	-0.960369	0.647711	-0.338327
BMP15	YNL071W	13	0.694857	-0.855653	0.60538	-0.337657
BMP15	YOR364W	1	0.0534505	-0.429427	0.22084	-0.334592
BMP15	YPL269W	2	0.106901	-0.761046	0.560392	-0.334562
BMP15	YPL195W	17	0.908659	-0.684119	0.513563	-0.332781
BMP15	YNL202W	16	0.855208	-0.45566	0.273515	-0.33103
BMP15	YNL253W	17	0.908659	-0.785965	0.579752	-0.330301
BMP15	YDL189W	80	4.27604	-0.582424	0.433016	-0.330225
BMP15	YPL026C	1	0.0534505	-0.911079	0.637752	-0.330037
BMP15	YOR099W	5	0.267253	-0.94568	0.652588	-0.328541
BMP15	YMR311C	17	0.908659	-1.02642	0.680043	-0.328412
BMP15	YER041W	5	0.267253	-0.76929	0.573482	-0.328117
BMP15	YPL001W	1	0.0534505	-0.742654	0.558908	-0.327579
BMP15	YJR099W	97	5.1847	-0.906246	0.638735	-0.327395
BMP15	YIL137C	20	1.06901	-0.85283	0.618966	-0.324957
BMP15	YDR269C	15	0.801758	-0.893063	0.636654	-0.324491
BMP15	YDR020C	7	0.374154	-0.760819	0.574102	-0.324031
BMP15	YDR078C	5	0.267253	-0.763101	0.575741	-0.323753
BMP15	YPL111W	4	0.213802	-0.836891	0.613941	-0.323089
BMP15	YHL026C	9	0.481055	-0.782878	0.587507	-0.322932
BMP15	YLL061W	21	1.12246	-0.786544	0.589588	-0.322807
BMP15	YJL214W	6	0.320703	-0.816126	0.60546	-0.321995
BMP15	YML100W-A	16	0.855208	-0.913431	0.647577	-0.321914
BMP15	YPL047W	7	0.374154	-0.793985	0.59456	-0.321913
BMP15	YBR050C	28	1.49661	-0.880786	0.634953	-0.321528
BMP15	YOL053W	15	0.801758	-0.806138	0.601198	-0.32149
BMP15	YMR234W	26	1.38971	-0.773488	0.586719	-0.319668
BMP15	YEL037C	4	0.213802	-0.689216	0.536988	-0.319115
BMP15	YBL051C	1	0.0534505	-0.988543	0.678878	-0.317443
BMP15	YDR117C	11	0.587956	-0.909038	0.650939	-0.31731
BMP15	YDR009W	32	1.71042	-0.790453	0.599567	-0.316524
BMP15	YJR144W	3	0.160352	-0.925301	0.659417	-0.315142
BMP15	YLL028W	33	1.76387	-0.85899	0.633204	-0.315074
BMP15	YMR148W	34	1.81732	-0.72185	0.567055	-0.312521
BMP15	YBR151W	3	0.160352	-0.76853	0.593545	-0.312373
BMP15	YBR008C	12	0.641406	-0.742457	0.579935	-0.31188
BMP15	YNL248C	1	0.0534505	-0.911939	0.661114	-0.309044
BMP15	YJR113C	3	0.160352	-0.884751	0.651274	-0.308536
BMP15	YBL017C	2	0.106901	-0.86472	0.643819	-0.307997
BMP15	YNL289W	11	0.587956	-0.774182	0.60261	-0.307652
BMP15	YIL009W	76	4.06224	-0.594762	0.483059	-0.307457
BMP15	YOR309C	2	0.106901	-0.764241	0.600802	-0.305083
BMP15	YOL028C	2	0.106901	-0.683306	0.558085	-0.301963
BMP15	YOR189W	3	0.160352	-0.821228	0.63256	-0.301752
BMP15	YOR185C	2	0.106901	-0.545995	0.448991	-0.300848
BMP15	YDL237W	53	2.83288	-0.854904	0.648408	-0.300577
BMP15	YPL133C	25	1.33626	-0.752423	0.602866	-0.298813
BMP15	YDL183C	41	2.19147	-0.69101	0.56988	-0.297217
BMP15	YOL079W	13	0.694857	-0.774818	0.617541	-0.296336
BMP15	YDR095C	44	2.35182	-0.69287	0.576658	-0.293321
BMP15	YJL124C	3	0.160352	-0.692366	0.576532	-0.293195
BMP15	YDL104C	22	1.17591	-0.81679	0.64184	-0.292542
BMP15	YPL039W	15	0.801758	-0.874243	0.665677	-0.29228
BMP15	YLR191W	3	0.160352	-0.699585	0.590255	-0.286652
BMP15	YOR144C	5	0.267253	-0.423869	0.324238	-0.286434
BMP15	YML048W-A	2	0.106901	-0.466323	0.387369	-0.285684
BMP15	YNL206C	3	0.160352	-0.83329	0.658432	-0.284625
BMP15	YOR383C	6	0.320703	-0.668771	0.57747	-0.282576
BMP15	YCR021C	14	0.748307	-0.779656	0.641224	-0.279721
BMP15	YNL239W	15	0.801758	-0.829527	0.663393	-0.279224
BMP15	YDL211C	14	0.748307	-0.676863	0.588223	-0.278717
BMP15	YJL110C	52	2.77943	-0.71022	0.609553	-0.277303
BMP15	YMR042W	7	0.374154	-0.890894	0.690916	-0.275361
BMP15	YEL014C	10	0.534505	-0.762682	0.639707	-0.274789
BMP15	YOR367W	5	0.267253	-0.366077	0.251041	-0.274177
BMP15	YHR117W	7	0.374154	-0.786311	0.654943	-0.271322
BMP15	YCR010C	3	0.160352	-0.82117	0.670467	-0.270602
BMP15	YLR130C	5	0.267253	-0.832578	0.677074	-0.268861
BMP15	YMR279C	19	1.01556	-0.44378	0.397158	-0.267529
BMP15	YNL293W	15	0.801758	-0.747717	0.643035	-0.266909
BMP15	YHR100C	1	0.0534505	-0.963192	0.723822	-0.266012
BMP15	YBR065C	33	1.76387	-0.756791	0.650539	-0.264469
BMP15	YBR104W	10	0.534505	-0.773332	0.658189	-0.264333
BMP15	YAL065C	7	0.374154	-0.888	0.702558	-0.264128
BMP15	YNL067W	5	0.267253	-0.880347	0.700028	-0.264079
BMP15	YJL084C	46	2.45872	-0.862926	0.694109	-0.263962
BMP15	YER172C-A	13	0.694857	-0.451359	0.415254	-0.26393
BMP15	YJL211C	10	0.534505	-0.691696	0.619237	-0.263372
BMP15	YOR350C	3	0.160352	-0.698488	0.624864	-0.262028
BMP15	YAL037W	18	0.96211	-0.368086	0.293443	-0.260074
BMP15	YDR306C	3	0.160352	-0.796236	0.673723	-0.259793
BMP15	YHR073W	4	0.213802	-0.733571	0.645936	-0.259731
BMP15	YLR202C	1	0.0534505	-0.650079	0.603594	-0.257695
BMP15	YOR358W	4	0.213802	-0.816045	0.684901	-0.257135
BMP15	YCL061C	1	0.0534505	-0.851645	0.698449	-0.256815
BMP15	YOR265W	24	1.28281	-0.684363	0.625411	-0.256355
BMP15	YOR338W	7	0.374154	-0.809157	0.684842	-0.255013
BMP15	YPL267W	5	0.267253	-0.808073	0.68477	-0.254729
BMP15	YBR204C	9	0.481055	-0.674464	0.622689	-0.254482
BMP15	YOR021C	18	0.96211	-0.764296	0.670489	-0.251844
BMP15	YBR028C	4	0.213802	-0.741473	0.661036	-0.251333
BMP15	YCL069W	13	0.694857	-0.838631	0.700964	-0.250781
BMP15	YIL117C	7	0.374154	-0.630481	0.603689	-0.249866
BMP15	YDR215C	2	0.106901	-0.818086	0.695712	-0.248933
BMP15	YMR102C	18	0.96211	-0.623515	0.607756	-0.24457
BMP15	YHL032C	7	0.374154	-0.912295	0.73581	-0.241019
BMP15	YOL045W	12	0.641406	-0.595745	0.597013	-0.240077
BMP15	YDR100W	7	0.374154	-0.762125	0.689187	-0.236878
BMP15	YMR156C	14	0.748307	-0.698074	0.662578	-0.235545
BMP15	YDR144C	24	1.28281	-0.789107	0.704414	-0.233249
BMP15	YIL076W	14	0.748307	-0.715662	0.67408	-0.233248
BMP15	YBR158W	12	0.641406	-0.650754	0.642577	-0.232594
BMP15	YBR147W	42	2.24492	-0.492302	0.527874	-0.232428
BMP15	YDR029W	36	1.92422	-0.531953	0.563832	-0.232021
BMP15	YPL051W	9	0.481055	-0.773443	0.702297	-0.230256
BMP15	YIL157C	16	0.855208	-0.715062	0.680019	-0.228806
BMP15	YBL027W	1	0.0534505	-0.951777	0.760374	-0.228071
BMP15	YLR213C	1	0.0534505	-0.802848	0.716704	-0.227444
BMP15	YIL035C	3	0.160352	-0.677098	0.66775	-0.224966
BMP15	YDR139C	25	1.33626	-0.72449	0.689734	-0.224785
BMP15	YDL206W	56	2.99323	-0.877262	0.745479	-0.223281
BMP15	YOL011W	13	0.694857	-0.799302	0.721692	-0.222452
BMP15	YDR151C	25	1.33626	-0.725399	0.693658	-0.22222
BMP15	YPL205C	1	0.0534505	-0.84968	0.738478	-0.22221
BMP15	YER080W	11	0.587956	-0.798578	0.723121	-0.22111
BMP15	YJL067W	42	2.24492	-0.677478	0.674077	-0.220806
BMP15	YNL227C	1	0.0534505	-1.05256	0.792034	-0.218896
BMP15	YDL027C	5	0.267253	-0.714828	0.694776	-0.218183
BMP15	YCL005W	5	0.267253	-0.723591	0.699052	-0.217764
BMP15	YPL064C	6	0.320703	-0.683675	0.681931	-0.217456
BMP15	YAR029W	21	1.12246	-0.38336	0.434125	-0.216934
BMP15	YDL172C	28	1.49661	-0.530914	0.592206	-0.216504
BMP15	YNL063W	136	7.26927	-0.488981	0.557274	-0.216485
BMP15	YDL026W	15	0.801758	-0.740224	0.708773	-0.215573
BMP15	YPL182C	12	0.641406	-0.644909	0.667356	-0.214525
BMP15	YIL067C	8	0.427604	-0.839354	0.745246	-0.213829
BMP15	YDR193W	5	0.267253	-0.66017	0.683652	-0.208843
BMP15	YML057W	14	0.748307	-0.634032	0.67275	-0.207487
BMP15	YMR122C	1	0.0534505	-0.838099	0.753022	-0.206992
BMP15	YPL136W	19	1.01556	-0.587034	0.652739	-0.203854
BMP15	YDL024C	5	0.267253	-0.677031	0.699238	-0.203626
BMP15	YBR195C	1	0.0534505	-0.767307	0.735472	-0.202974
BMP15	YDR250C	10	0.534505	-0.742577	0.731112	-0.19967
BMP15	YJR127C	48	2.56563	-0.811309	0.754541	-0.199143
BMP15	YBL015W	16	0.855208	-0.73083	0.728835	-0.198176
BMP15	YDR111C	13	0.694857	-0.654964	0.69872	-0.197328
BMP15	YIL146C	36	1.92422	-0.61	0.676836	-0.19713
BMP15	YJR111C	1	0.0534505	-0.760789	0.741039	-0.197014
BMP15	YJR003C	11	0.587956	-0.584902	0.665981	-0.195368
BMP15	YPR002W	13	0.694857	-0.693329	0.718723	-0.195017
BMP15	YIL086C	8	0.427604	-0.871809	0.777087	-0.194338
BMP15	YHR104W	19	1.01556	-0.682992	0.717418	-0.193001
BMP15	YNL077W	11	0.587956	-0.59237	0.678937	-0.190188
BMP15	YBL090W	3	0.160352	-0.509309	0.629247	-0.188828
BMP15	YCR011C	12	0.641406	-0.73935	0.745501	-0.188164
BMP15	YNL155W	17	0.908659	-0.664077	0.721015	-0.185268
BMP15	YBR261C	23	1.22936	-0.31365	0.421198	-0.181542
BMP15	YHR093W	8	0.427604	-0.782406	0.768084	-0.181452
BMP15	YER137C	3	0.160352	-0.644919	0.720057	-0.180541
BMP15	YIL074C	128	6.84167	-0.669581	0.730956	-0.180147
BMP15	YMR106C	13	0.694857	-0.632558	0.717311	-0.178817
BMP15	YNL259C	14	0.748307	-0.672562	0.735058	-0.17819
BMP15	YNL273W	4	0.213802	-0.495972	0.642877	-0.177123
BMP15	YOR134W	2	0.106901	-0.538349	0.674045	-0.175478
BMP15	YIL125W	3	0.160352	-0.822245	0.787058	-0.175091
BMP15	YOR111W	19	1.01556	-0.330873	0.472101	-0.174668
BMP15	YOR151C	10	0.534505	-0.572793	0.696998	-0.173558
BMP15	YPL165C	26	1.38971	-0.792339	0.782052	-0.172688
BMP15	YMR104C	25	1.33626	-0.768497	0.775453	-0.172564
BMP15	YHR143W	4	0.213802	-0.779719	0.779037	-0.172289
BMP15	YBR090C-A	9	0.481055	-0.538844	0.680682	-0.172062
BMP15	YMR283C	10	0.534505	-0.480959	0.64325	-0.171582
BMP15	YML003W	12	0.641406	-0.619984	0.724369	-0.170887
BMP15	YLL005C	19	1.01556	-0.65536	0.74193	-0.169128
BMP15	YDL012C	37	1.97767	-0.553837	0.694702	-0.169085
BMP15	YOL037C	8	0.427604	-0.589963	0.717042	-0.166935
BMP15	YLR030W	20	1.06901	-0.79581	0.790813	-0.166473
BMP15	YOL032W	16	0.855208	-0.636951	0.740593	-0.16523
BMP15	YJR054W	13	0.694857	-0.709511	0.767741	-0.16479
BMP15	YLR043C	26	1.38971	-0.640141	0.742578	-0.164786
BMP15	YMR011W	13	0.694857	-0.800402	0.794494	-0.164487
BMP15	YJR083C	16	0.855208	-0.66845	0.754803	-0.163902
BMP15	YBL003C	7	0.374154	-0.569595	0.714029	-0.162888
BMP15	YJL122W	35	1.87077	-0.541031	0.699965	-0.162328
BMP15	YER002W	7	0.374154	-0.360573	0.550234	-0.162173
BMP15	YER153C	14	0.748307	-0.713993	0.773058	-0.162035
BMP15	YMR316C-A	5	0.267253	-0.537509	0.699741	-0.161392
BMP15	YPL101W	5	0.267253	-0.812674	0.803888	-0.159375
BMP15	YDL187C	71	3.79499	-0.609079	0.740023	-0.158346
BMP15	YMR189W	8	0.427604	-0.761655	0.792632	-0.157943
BMP15	YAR023C	6	0.320703	-0.35638	0.557954	-0.157536
BMP15	YOL046C	25	1.33626	-0.658486	0.760784	-0.15752
BMP15	YDL199C	36	1.92422	-0.551279	0.715396	-0.156896
BMP15	YMR214W	6	0.320703	-0.661328	0.763932	-0.156118
BMP15	YER060W-A	10	0.534505	-0.597683	0.739358	-0.155781
BMP15	YNL237W	3	0.160352	-0.744718	0.792297	-0.15468
BMP15	YLR169W	2	0.106901	-0.749356	0.797095	-0.152048
BMP15	YIL016W	5	0.267253	-0.643889	0.765885	-0.150744
BMP15	YJL099W	23	1.22936	-0.576616	0.738578	-0.15074
BMP15	YCL014W	86	4.59675	-0.430563	0.650104	-0.150652
BMP15	YLR174W	4	0.213802	-0.713333	0.789779	-0.149958
BMP15	YLR165C	13	0.694857	-0.568802	0.742907	-0.146235
BMP15	YML120C	25	1.33626	-0.735687	0.801974	-0.145685
BMP15	YHL023C	8	0.427604	-0.716299	0.797554	-0.145011
BMP15	YOR190W	4	0.213802	-0.728685	0.802571	-0.143863
BMP15	YJR106W	194	10.3694	-0.389052	0.631985	-0.143177
BMP15	YHR123W	10	0.534505	-0.590648	0.757806	-0.143051
BMP15	YOR123C	1	0.0534505	-0.864547	0.83514	-0.142529
BMP15	YNL144C	119	6.36061	-0.459233	0.691589	-0.141632
BMP15	YJR050W	16	0.855208	-0.211368	0.332248	-0.141142
BMP15	YLR081W	20	1.06901	-0.582757	0.7579	-0.141086
BMP15	YDR134C	33	1.76387	-0.409838	0.657083	-0.140541
BMP15	YDR309C	6	0.320703	-0.733088	0.808776	-0.140184
BMP15	YEL012W	8	0.427604	-0.503237	0.723397	-0.139197
BMP15	YMR284W	22	1.17591	-0.769786	0.821069	-0.137739
BMP15	YIL056W	89	4.7571	-0.759494	0.818836	-0.137593
BMP15	YAR031W	20	1.06901	-0.728345	0.812108	-0.13685
BMP15	YLR038C	6	0.320703	-0.489234	0.723955	-0.135051
BMP15	YER174C	5	0.267253	-0.695986	0.808502	-0.13328
BMP15	YER128W	21	1.12246	-0.522494	0.745029	-0.133221
BMP15	YDR048C	10	0.534505	-0.629126	0.788957	-0.132773
BMP15	YMR152W	36	1.92422	-0.265994	0.502289	-0.132388
BMP15	YER040W	83	4.43639	-0.457179	0.711607	-0.131847
BMP15	YOR242C	5	0.267253	-0.725945	0.820514	-0.130297
BMP15	YDL113C	35	1.87077	-0.619447	0.793138	-0.12814
BMP15	YCL064C	10	0.534505	-0.551872	0.768328	-0.127853
BMP15	YMR258C	22	1.17591	-0.607129	0.791196	-0.126771
BMP15	YEL067C	47	2.51217	-0.407137	0.695376	-0.124024
BMP15	YNL214W	54	2.88633	-0.486331	0.745721	-0.123664
BMP15	YOR343C	65	3.47428	-0.522508	0.764697	-0.122948
BMP15	YDR075W	4	0.213802	-0.623872	0.807764	-0.119931
BMP15	YEL017W	2	0.106901	-0.653637	0.816647	-0.119846
BMP15	YCR020C	6	0.320703	-0.630451	0.811575	-0.118793
BMP15	YDR150W	2	0.106901	-0.751631	0.842073	-0.118703
BMP15	YMR030W	2	0.106901	-0.662687	0.822357	-0.117722
BMP15	YOR032C	7	0.374154	-0.542799	0.783874	-0.117313
BMP15	YHR121W	28	1.49661	-0.565244	0.797136	-0.114667
BMP15	YER034W	5	0.267253	-0.664082	0.828529	-0.113871
BMP15	YJR039W	14	0.748307	-0.66665	0.829782	-0.113476
BMP15	YBR218C	24	1.28281	-0.714514	0.841388	-0.113331
BMP15	YML117W	2	0.106901	-0.785583	0.861106	-0.109113
BMP15	YLR451W	3	0.160352	-0.63739	0.829096	-0.108932
BMP15	YHR134W	58	3.10013	-0.515337	0.789228	-0.108618
BMP15	YMR276W	77	4.11569	-0.5541	0.807142	-0.106863
BMP15	YPL089C	3	0.160352	-0.714796	0.851481	-0.106161
BMP15	YJL169W	10	0.534505	-0.520642	0.796855	-0.105766
BMP15	YLL032C	35	1.87077	-0.569353	0.815557	-0.105013
BMP15	YDR314C	6	0.320703	-0.641877	0.840281	-0.10252
BMP15	YOR316C	46	2.45872	-0.410527	0.75034	-0.102492
BMP15	YDR258C	63	3.36738	-0.466994	0.784276	-0.100742
BMP15	YAL018C	16	0.855208	-0.200051	0.499117	-0.100202
BMP15	YHL042W	30	1.60352	-0.655194	0.847384	-0.0999933
BMP15	YDR093W	15	0.801758	-0.512909	0.805952	-0.0995289
BMP15	YMR048W	41	2.19147	-0.517108	0.809041	-0.0987465
BMP15	YDR317W	2	0.106901	-0.630845	0.84514	-0.0976928
BMP15	YNL200C	28	1.49661	-0.651333	0.8503	-0.0975048
BMP15	YLL052C	13	0.694857	-0.699754	0.861998	-0.0965674
BMP15	YDL056W	4	0.213802	-0.762449	0.874289	-0.0958483
BMP15	YDR122W	19	1.01556	-0.686576	0.861724	-0.094937
BMP15	YMR019W	38	2.03112	-0.21392	0.561952	-0.0937072
BMP15	YHR095W	14	0.748307	-0.319078	0.715577	-0.0907531
BMP15	YHR105W	13	0.694857	-0.643596	0.86013	-0.0900195
BMP15	YHR029C	3	0.160352	-0.518031	0.827894	-0.0891564
BMP15	YLR193C	2	0.106901	-0.712314	0.875478	-0.0886985
BMP15	YBR207W	17	0.908659	-0.498217	0.823343	-0.0880137
BMP15	YMR264W	29	1.55007	-0.538566	0.838867	-0.0867808
BMP15	YOR035C	1	0.0534505	-0.908514	0.904705	-0.086577
BMP15	YNL283C	8	0.427604	-0.692456	0.875614	-0.0861319
BMP15	YJL150W	51	2.72598	-0.794504	0.892095	-0.0857311
BMP15	YHR078W	137	7.32272	-0.413631	0.795195	-0.0847138
BMP15	YOR132W	2	0.106901	-0.470709	0.820122	-0.0846702
BMP15	YJR005W	8	0.427604	-0.642466	0.868573	-0.0844376
BMP15	YHR111W	1	0.0534505	-0.672484	0.876364	-0.083143
BMP15	YNL307C	6	0.320703	-0.674095	0.877671	-0.0824614
BMP15	YJR010W	35	1.87077	-0.31865	0.745043	-0.0812421
BMP15	YMR313C	13	0.694857	-0.510701	0.8422	-0.0805887
BMP15	YLR054C	8	0.427604	-0.713607	0.887115	-0.0805557
BMP15	YJR021C	8	0.427604	-0.574095	0.861525	-0.0794977
BMP15	YLR072W	20	1.06901	-0.538564	0.852399	-0.0794927
BMP15	YPL167C	45	2.40527	-0.568257	0.861716	-0.0785808
BMP15	YAL015C	19	1.01556	-0.516697	0.84912	-0.0779594
BMP15	YOR064C	28	1.49661	-0.809964	0.904081	-0.0776908
BMP15	YDR043C	48	2.56563	-0.352287	0.781061	-0.0771295
BMP15	YOL052C	8	0.427604	-0.667885	0.88465	-0.0770403
BMP15	YJL138C	9	0.481055	-0.509713	0.849917	-0.0764995
BMP15	YDL186W	106	5.66576	-0.633914	0.88128	-0.0752579
BMP15	YPL046C	4	0.213802	-0.741891	0.900423	-0.073875
BMP15	YMR028W	2	0.106901	-0.836289	0.91294	-0.0728071
BMP15	YJL145W	10	0.534505	-0.626925	0.887138	-0.070756
BMP15	YDR056C	20	1.06901	-0.559742	0.876684	-0.0690254
BMP15	YLR018C	407	21.7544	-0.227941	0.701046	-0.0681439
BMP15	YMR175w	3	0.160352	-0.585382	0.883742	-0.0680555
BMP15	YDR272W	21	1.12246	-0.512059	0.86922	-0.0669673
BMP15	YNL288W	40	2.13802	-0.597638	0.888461	-0.0666598
BMP15	YMR317W	26	1.38971	-0.677952	0.902	-0.066439
BMP15	YAL061W	63	3.36738	-0.536129	0.88025	-0.0642016
BMP15	YNL274C	253	13.523	-0.390963	0.83597	-0.0641298
BMP15	YHR018C	18	0.96211	-0.411391	0.847963	-0.0625467
BMP15	YHR037W	16	0.855208	-0.504887	0.876937	-0.0621327
BMP15	YPL150W	6	0.320703	-0.345767	0.821436	-0.0617417
BMP15	YOR097C	22	1.17591	-0.555008	0.890419	-0.0608184
BMP15	YCL074W	63	3.36738	-0.53526	0.887397	-0.060272
BMP15	YDL093W	6	0.320703	-0.638022	0.905803	-0.0600998
BMP15	YPL112C	15	0.801758	-0.354042	0.830486	-0.0600153
BMP15	YOR100C	10	0.534505	-0.635504	0.90736	-0.058873
BMP15	YLR096W	9	0.481055	-0.663898	0.911382	-0.0588333
BMP15	YLR080W	3	0.160352	-0.728937	0.919547	-0.0586454
BMP15	YCL073C	23	1.22936	-0.553289	0.894275	-0.0584964
BMP15	YDR069C	2	0.106901	-0.661444	0.912578	-0.057825
BMP15	YPL270W	4	0.213802	-0.557686	0.896817	-0.0575438
BMP15	YER171W	15	0.801758	-0.489298	0.884894	-0.0563211
BMP15	YMR147W	88	4.70365	-0.533731	0.894916	-0.0560867
BMP15	YER056C	75	4.00879	-0.427304	0.868783	-0.0560695
BMP15	YPL199C	13	0.694857	-0.418421	0.869417	-0.0546386
BMP15	YJR094W-A	14	0.748307	-0.632627	0.914598	-0.0540274
BMP15	YML037C	90	4.81055	-0.348307	0.851172	-0.0518378
BMP15	YOR156C	63	3.36738	-0.568737	0.90979	-0.051306
BMP15	YOL051W	1	0.0534505	-1.43301	0.964368	-0.0510606
BMP15	YNL217W	3	0.160352	-0.470333	0.896845	-0.0485175
BMP15	YPL192C	11	0.587956	-0.80837	0.940601	-0.0480167
BMP15	YNL105W	17	0.908659	-0.359043	0.867352	-0.0476263
BMP15	YJR062C	36	1.92422	-0.614255	0.923164	-0.0471968
BMP15	YPL274W	11	0.587956	-0.695497	0.938977	-0.0424411
BMP15	YAL049C	4	0.213802	-0.590885	0.929213	-0.0418268
BMP15	YOL084W	39	2.08457	-0.51301	0.919135	-0.0414847
BMP15	YPL227C	5	0.267253	-0.624643	0.933618	-0.0414649
BMP15	YOR271C	16	0.855208	-0.634137	0.936771	-0.0400957
BMP15	YPL221W	3	0.160352	-0.34178	0.883967	-0.0396579
BMP15	YIL014W	5	0.267253	-0.722507	0.946394	-0.0387304
BMP15	YML014W	2	0.106901	-0.727641	0.947895	-0.0379134
BMP15	YBR020W	11	0.587956	-0.639525	0.94129	-0.0375465
BMP15	YER106W	119	6.36061	-0.41521	0.912244	-0.0364374
BMP15	YOR341W	4	0.213802	-0.415409	0.913308	-0.0360126
BMP15	YDL040C	1	0.0534505	-0.830947	0.958354	-0.0346059
BMP15	YNL236W	3	0.160352	-0.897844	0.961655	-0.0344275
BMP15	YML074C	17	0.908659	-0.369481	0.907116	-0.0343189
BMP15	YMR194W	8	0.427604	-0.729674	0.954629	-0.0331063
BMP15	YHR127W	18	0.96211	-0.493087	0.933455	-0.0328122
BMP15	YHR075C	2	0.106901	-0.705131	0.954772	-0.0318917
BMP15	YPL161C	3	0.160352	-0.643105	0.951084	-0.0314579
BMP15	YDR209C	4	0.213802	-0.46779	0.934375	-0.0306987
BMP15	YAL040C	2	0.106901	-0.691578	0.957464	-0.0294171
BMP15	YER004W	9	0.481055	-0.517584	0.943441	-0.0292741
BMP15	YLR079W	1	0.0534505	-0.848532	0.965515	-0.0292618
BMP15	YER033C	16	0.855208	-0.41304	0.929776	-0.0290053
BMP15	YHL040C	10	0.534505	-0.597139	0.952011	-0.0286563
BMP15	YPL123C	4	0.213802	-0.573512	0.951066	-0.0280643
BMP15	YMR039C	12	0.641406	-0.707813	0.965021	-0.0247584
BMP15	YHL041W	186	9.9418	-0.319214	0.925933	-0.0236432
BMP15	YCR006C	1	0.0534505	-0.731093	0.968568	-0.0229795
BMP15	YDR133C	14	0.748307	-0.492336	0.953747	-0.0227723
BMP15	YOR030W	24	1.28281	-0.48007	0.952681	-0.0227163
BMP15	YOR221C	1	0.0534505	-0.748538	0.971647	-0.021223
BMP15	YAR040C	50	2.67253	-0.405331	0.949286	-0.020556
BMP15	YBR139W	18	0.96211	-0.627271	0.967254	-0.0205407
BMP15	YEL043W	23	1.22936	-0.447799	0.955799	-0.0197931
BMP15	YLR199C	10	0.534505	-0.710339	0.973502	-0.0188222
BMP15	YNL087W	37	1.97767	-0.454111	0.958694	-0.0187573
BMP15	YIL138C	21	1.12246	-0.301865	0.938493	-0.0185668
BMP15	YDR086C	4	0.213802	-0.475531	0.961534	-0.0182918
BMP15	YPL219W	9	0.481055	-0.45425	0.96321	-0.0167119
BMP15	YER175C	6	0.320703	-0.469329	0.964922	-0.0164632
BMP15	YIL126W	3	0.160352	-0.57715	0.972574	-0.0158289
BMP15	YOR334W	36	1.92422	-0.485008	0.970281	-0.0144137
BMP15	YLR227C	5	0.267253	-0.555822	0.975044	-0.0138712
BMP15	YML002W	10	0.534505	-0.480157	0.971562	-0.0136547
BMP15	YML029W	40	2.13802	-0.25751	0.948205	-0.0133378
BMP15	YOR377W	17	0.908659	-0.513545	0.97513	-0.0127721
BMP15	YDL243C	79	4.22259	-0.497167	0.97637	-0.0117482
BMP15	YJR150C	55	2.93978	-0.413285	0.981452	-0.00766543
BMP15	YDL094C	10	0.534505	-0.555495	0.989543	-0.00580886
BMP15	YPL198W	11	0.587956	-0.362372	0.988932	-0.00401066
BMP15	YOL062C	18	0.96211	-0.452867	0.993348	-0.00301245
BMP15	YBL067C	27	1.44316	-0.535882	0.998287	-0.000918134
BMP15	YDR274C	1	0.0534505	-0.697246	0.999225	-0.000540655
APOL1	YHR022C	1	0.0601281	-2.53013	0.0550249	-2.39091
APOL1	YBR230C	44	2.64564	-2.45536	0.0447965	-2.34537
APOL1	YBR228W	3	0.180384	-2.52974	0.0793637	-2.32897
APOL1	YBR229C	3	0.180384	-2.43102	0.0558221	-2.29531
APOL1	YNL122C	6	0.360769	-2.20815	0.0531529	-2.09078
APOL1	YLR135W	3	0.180384	-2.37259	0.17724	-1.95207
APOL1	YHR131C	3	0.180384	-2.11629	0.0846044	-1.93724
APOL1	YAL065C	1	0.0601281	-2.22362	0.137107	-1.91874
APOL1	YNL125C	15	0.901922	-2.2737	0.165137	-1.89823
APOL1	YCL076W	6	0.360769	-2.22207	0.146989	-1.89545
APOL1	YDR011W	16	0.96205	-2.17031	0.164259	-1.81382
APOL1	YJR034W	1	0.0601281	-2.14153	0.153869	-1.81202
APOL1	YJR148W	11	0.66141	-2.10103	0.139817	-1.80727
APOL1	YJL043W	19	1.14243	-2.23777	0.201674	-1.78647
APOL1	YJL164C	1	0.0601281	-2.0015	0.126873	-1.74756
APOL1	YLL052C	4	0.240513	-2.07893	0.189336	-1.68532
APOL1	YLR218C	1	0.0601281	-2.00042	0.159826	-1.6807
APOL1	YHR117W	1	0.0601281	-1.88571	0.134677	-1.63175
APOL1	YJL122W	12	0.721538	-1.87766	0.137676	-1.61915
APOL1	YNL129W	25	1.5032	-2.00869	0.218271	-1.57025
APOL1	YDL154W	112	6.73435	-1.94128	0.199041	-1.55488
APOL1	YLR064W	2	0.120256	-1.84505	0.16215	-1.54588
APOL1	YJL103C	1	0.0601281	-1.73698	0.116883	-1.53395
APOL1	YNL066W	30	1.80384	-1.88618	0.188896	-1.52989
APOL1	YNL104C	20	1.20256	-2.02747	0.253079	-1.51436
APOL1	YER067C-A	6	0.360769	-1.91541	0.209985	-1.5132
APOL1	YHL016C	3	0.180384	-1.8632	0.191455	-1.50648
APOL1	YLR134W	1	0.0601281	-1.77282	0.156187	-1.49593
APOL1	YAR042W	1	0.0601281	-1.6409	0.10832	-1.46316
APOL1	YMR102C	5	0.300641	-1.69112	0.140852	-1.45292
APOL1	YDR073W	8	0.481025	-1.79145	0.193915	-1.44406
APOL1	YER042W	2	0.120256	-1.78876	0.20294	-1.42575
APOL1	YCR023C	5	0.300641	-1.74332	0.188973	-1.41388
APOL1	YMR246W	2	0.120256	-1.67064	0.160749	-1.40209
APOL1	YER120W	1	0.0601281	-1.67873	0.164824	-1.40204
APOL1	YPL021W	3	0.180384	-1.75884	0.216243	-1.3785
APOL1	YIL111W	2	0.120256	-1.6623	0.173354	-1.37413
APOL1	YJL162C	2	0.120256	-1.57844	0.140876	-1.35608
APOL1	YER128W	7	0.420897	-1.60294	0.164196	-1.33974
APOL1	YER158C	7	0.420897	-1.80637	0.260057	-1.33661
APOL1	YLR131C	66	3.96846	-1.62023	0.198472	-1.29866
APOL1	YDR256C	4	0.240513	-1.55755	0.167576	-1.29654
APOL1	YBR050C	17	1.02218	-1.7892	0.276552	-1.2944
APOL1	YPL260W	1	0.0601281	-1.58274	0.19328	-1.27683
APOL1	YDR251W	2	0.120256	-1.56416	0.189036	-1.26848
APOL1	YJR077C	1	0.0601281	-1.69619	0.254242	-1.26495
APOL1	YLR110C	20	1.20256	-1.6475	0.247387	-1.23993
APOL1	YPL163C	4	0.240513	-1.71748	0.278438	-1.23927
APOL1	YNL123W	12	0.721538	-1.70249	0.274405	-1.23532
APOL1	YNL314W	2	0.120256	-1.54168	0.199277	-1.23446
APOL1	YBR074W	12	0.721538	-1.52216	0.192595	-1.229
APOL1	YNL076W	6	0.360769	-1.5187	0.19353	-1.22479
APOL1	YDL114W	13	0.781666	-1.58906	0.231055	-1.2219
APOL1	YOR165W	2	0.120256	-1.67384	0.270356	-1.22131
APOL1	YMR007W	4	0.240513	-1.51208	0.205069	-1.202
APOL1	YDL024C	1	0.0601281	-1.46447	0.180614	-1.19997
APOL1	YMR178W	6	0.360769	-1.6176	0.263354	-1.1916
APOL1	YJL005W	2	0.120256	-1.69447	0.302342	-1.18216
APOL1	YJR035W	7	0.420897	-1.5604	0.246205	-1.17622
APOL1	YML032C-A	10	0.601281	-1.5894	0.262732	-1.17182
APOL1	YLR137W	12	0.721538	-1.72227	0.321832	-1.16799
APOL1	YML089C	65	3.90833	-1.8318	0.365886	-1.16157
APOL1	YDL009C	9	0.541153	-1.77183	0.348043	-1.15516
APOL1	YBR204C	3	0.180384	-1.43308	0.199546	-1.14712
APOL1	YLR174W	1	0.0601281	-1.48964	0.230713	-1.14596
APOL1	YHR009C	39	2.345	-1.50338	0.24268	-1.13854
APOL1	YDR214W	13	0.781666	-1.70807	0.340967	-1.12568
APOL1	YBL045C	1	0.0601281	-1.47481	0.237989	-1.12382
APOL1	YBR025C	3	0.180384	-1.57619	0.291976	-1.11598
APOL1	YDL135C	9	0.541153	-1.45564	0.237022	-1.11062
APOL1	YBR223C	5	0.300641	-1.50407	0.267717	-1.1014
APOL1	YLL020C	4	0.240513	-1.43015	0.23179	-1.09866
APOL1	YNL319W	4	0.240513	-1.62151	0.32406	-1.09605
APOL1	YPL035C	2	0.120256	-1.54908	0.294026	-1.09361
APOL1	YBL071C	1	0.0601281	-1.47542	0.259157	-1.09305
APOL1	YMR216C	2	0.120256	-1.66491	0.348913	-1.084
APOL1	YBR041W	1	0.0601281	-1.4597	0.265232	-1.07254
APOL1	YNL091W	6	0.360769	-1.4512	0.26269	-1.06998
APOL1	YDR095C	28	1.68359	-1.42322	0.253716	-1.06213
APOL1	YOL043C	3	0.180384	-1.44897	0.267862	-1.06085
APOL1	YDR263C	12	0.721538	-1.47708	0.29162	-1.04634
APOL1	YIL165C	18	1.08231	-1.62048	0.354434	-1.04613
APOL1	YMR310C	1	0.0601281	-1.38137	0.25583	-1.02798
APOL1	YBR218C	15	0.901922	-1.56333	0.344605	-1.0246
APOL1	YOR108W	5	0.300641	-1.40006	0.272895	-1.01799
APOL1	YJL036W	12	0.721538	-1.3992	0.272833	-1.01745
APOL1	YIL113W	1	0.0601281	-1.40678	0.278421	-1.0151
APOL1	YDR075W	1	0.0601281	-1.32053	0.231497	-1.01483
APOL1	YOR342C	31	1.86397	-1.33195	0.239678	-1.01271
APOL1	YDR098C	7	0.420897	-1.30837	0.226993	-1.01138
APOL1	YLR152C	10	0.601281	-1.38246	0.269956	-1.00926
APOL1	YNL300W	2	0.120256	-1.38684	0.274531	-1.00611
APOL1	YHR077C	5	0.300641	-1.49672	0.328788	-1.00462
APOL1	YJR021C	3	0.180384	-1.35476	0.260871	-1.00134
APOL1	YNL230C	2	0.120256	-1.32038	0.243723	-0.998573
APOL1	YJR056C	13	0.781666	-1.34007	0.256383	-0.996501
APOL1	YHL014C	67	4.02859	-1.33857	0.255985	-0.995913
APOL1	YNL136W	10	0.601281	-1.43814	0.312498	-0.988725
APOL1	YBR119W	4	0.240513	-1.29682	0.238059	-0.988098
APOL1	YHR049W	2	0.120256	-1.27783	0.227982	-0.986507
APOL1	YIL073C	129	7.75653	-1.24235	0.206152	-0.986238
APOL1	YHR207C	1	0.0601281	-1.18204	0.16566	-0.986224
APOL1	YPL212C	1	0.0601281	-1.14625	0.13963	-0.986202
APOL1	YER115C	6	0.360769	-1.39011	0.290576	-0.986178
APOL1	YOR322C	1	0.0601281	-1.20099	0.187504	-0.9758
APOL1	YJR053W	7	0.420897	-1.31968	0.265016	-0.969941
APOL1	YOL055C	6	0.360769	-1.34154	0.277696	-0.968999
APOL1	YMR154C	55	3.30705	-1.22969	0.212737	-0.968092
APOL1	YER177W	6	0.360769	-1.42129	0.32102	-0.965028
APOL1	YDL213C	1	0.0601281	-1.42821	0.327017	-0.961163
APOL1	YLR089C	3	0.180384	-1.52557	0.372547	-0.957224
APOL1	YAR014C	2	0.120256	-1.32769	0.279431	-0.956692
APOL1	YIL084C	1	0.0601281	-1.2576	0.2409	-0.954646
APOL1	YOL068C	2	0.120256	-1.45861	0.346105	-0.95378
APOL1	YMR145C	25	1.5032	-1.50761	0.367806	-0.953101
APOL1	YOL080C	7	0.420897	-1.38073	0.310067	-0.952611
APOL1	YHR001W-A	23	1.38295	-1.49682	0.365504	-0.949728
APOL1	YCL063W	1	0.0601281	-1.31945	0.280216	-0.949719
APOL1	YAL014C	8	0.481025	-1.32706	0.291344	-0.940431
APOL1	YOR028C	33	1.98423	-1.34806	0.302718	-0.939981
APOL1	YHL035C	2	0.120256	-1.45876	0.35716	-0.937749
APOL1	YAL036C	14	0.841794	-1.30583	0.282983	-0.936303
APOL1	YHL038C	1	0.0601281	-1.39757	0.331799	-0.933855
APOL1	YML066C	31	1.86397	-1.34482	0.306759	-0.932287
APOL1	YMR184W	15	0.901922	-1.41156	0.339951	-0.931696
APOL1	YDR305C	1	0.0601281	-1.43195	0.350012	-0.930753
APOL1	YBR213W	1	0.0601281	-1.45055	0.359348	-0.929301
APOL1	YLR204W	1	0.0601281	-1.29375	0.282919	-0.927726
APOL1	YLL009C	3	0.180384	-1.30332	0.289345	-0.926207
APOL1	YAL028W	6	0.360769	-1.35513	0.316544	-0.92617
APOL1	YNL087W	22	1.32282	-1.30639	0.291671	-0.925357
APOL1	YDR085C	8	0.481025	-1.35787	0.320627	-0.922498
APOL1	YHL027W	16	0.96205	-1.32966	0.307816	-0.92037
APOL1	YHL029C	5	0.300641	-1.39588	0.342166	-0.918256
APOL1	YOR289W	15	0.901922	-1.33906	0.315923	-0.916018
APOL1	YPL004C	4	0.240513	-1.25237	0.270108	-0.914096
APOL1	YNL145W	36	2.16461	-1.35967	0.328098	-0.913564
APOL1	YHR152W	1	0.0601281	-1.28864	0.29224	-0.912046
APOL1	YJR087W	19	1.14243	-1.24344	0.270639	-0.906918
APOL1	YOR155C	29	1.74372	-1.31984	0.3129	-0.90686
APOL1	YOL011W	8	0.481025	-1.41762	0.362499	-0.903736
APOL1	YBR203W	5	0.300641	-1.3587	0.335574	-0.902757
APOL1	YLR210W	5	0.300641	-1.32007	0.318166	-0.900068
APOL1	YOR112W	2	0.120256	-1.25175	0.285768	-0.894041
APOL1	YJR069C	13	0.781666	-1.29242	0.310116	-0.891621
APOL1	YNL097C	8	0.481025	-1.26872	0.297928	-0.890732
APOL1	YOR315W	1	0.0601281	-1.09221	0.198097	-0.875847
APOL1	YPL079W	3	0.180384	-1.41213	0.38224	-0.872357
APOL1	YIL032C	3	0.180384	-1.22022	0.2851	-0.872335
APOL1	YBR099C	1	0.0601281	-1.30252	0.330588	-0.871923
APOL1	YMR100W	9	0.541153	-1.3693	0.364787	-0.869797
APOL1	YNL154C	2	0.120256	-1.19884	0.274514	-0.869744
APOL1	YPR004C	4	0.240513	-1.12773	0.228976	-0.869507
APOL1	YJR098C	206	12.3864	-1.00027	0.133679	-0.866553
APOL1	YMR099C	1	0.0601281	-1.26809	0.319205	-0.863309
APOL1	YDR230W	1	0.0601281	-1.20374	0.283946	-0.861944
APOL1	YMR252C	49	2.94628	-1.20854	0.287897	-0.860605
APOL1	YML079W	4	0.240513	-0.986587	0.131002	-0.857342
APOL1	YML087C	110	6.6141	-1.3626	0.372837	-0.854576
APOL1	YIL079C	1	0.0601281	-1.23337	0.308417	-0.852981
APOL1	YNL144C	84	5.05076	-1.15275	0.261208	-0.851644
APOL1	YBR141C	8	0.481025	-1.26358	0.327621	-0.849606
APOL1	YNL115C	14	0.841794	-1.32025	0.358133	-0.847422
APOL1	YNL140C	19	1.14243	-1.15265	0.273034	-0.837936
APOL1	YPL048W	11	0.66141	-1.24575	0.329053	-0.835831
APOL1	YBL049W	2	0.120256	-1.25127	0.334042	-0.833296
APOL1	YOR099W	3	0.180384	-1.37717	0.395094	-0.833059
APOL1	YER169W	3	0.180384	-1.16402	0.287224	-0.829686
APOL1	YOR126C	14	0.841794	-1.31284	0.369593	-0.827626
APOL1	YEL056W	11	0.66141	-1.26619	0.347425	-0.826284
APOL1	YMR158W-A	7	0.420897	-1.25796	0.344776	-0.824248
APOL1	YJL060W	51	3.06654	-1.30232	0.370074	-0.820362
APOL1	YIL028W	2	0.120256	-1.26576	0.351934	-0.820296
APOL1	YMR176W	48	2.88615	-1.37327	0.405724	-0.8161
APOL1	YLR180W	72	4.32923	-1.13663	0.283334	-0.814586
APOL1	YOL059W	3	0.180384	-1.31684	0.381781	-0.814093
APOL1	YHR127W	10	0.601281	-1.20312	0.324817	-0.812327
APOL1	YDR286C	1	0.0601281	-1.02171	0.208363	-0.80882
APOL1	YOR024W	10	0.601281	-1.23256	0.344366	-0.808105
APOL1	YER182W	4	0.240513	-1.20587	0.332791	-0.804568
APOL1	YBL099W	1	0.0601281	-1.12954	0.292521	-0.799126
APOL1	YHR143W	2	0.120256	-1.29135	0.382101	-0.797925
APOL1	YCL048W	2	0.120256	-1.62975	0.510943	-0.797042
APOL1	YPL261C	9	0.541153	-1.23754	0.357412	-0.795229
APOL1	YMR278W	14	0.841794	-1.10952	0.286179	-0.791998
[truncated: 13,598 more rows]
