# Supplementary material for: Yeast genetic interaction screen of human genes associated with amyotrophic lateral sclerosis: identification of MAP2K5 kinase as a potential drug target
Source: Genome Res. 2017 Sep;27(9):1487–500. doi: 10.1101/gr.211649.116 (PMC5580709; doi:10.1101/gr.211649.116)
Supplement: Supplemental Material [file supp_gr.211649.116_Supplemental_Table_S3.xlsx]

## Sheet: OPTN Suppressor
Supplemental Table 3. List of toxicity modifiers tested by yeast spot assays.
Rank	Query (OMIM)	Subject (yeast gene deletion)	Barcode counts	Normalized barcode counts	Z-score	Error rate	Min Z-score
1	OPTN	YBL048W	17	0.814465	3.72867	0.335927	2.47611
11	OPTN	YOR189W	19	0.910284	3.18371	0.353968	2.05678
21	OPTN	YML076C	49	2.34757	2.7647	0.310318	1.90676
31	OPTN	YOR363C	12	0.574916	2.62688	0.459249	1.42049
41	OPTN	YJL164C	28	1.34147	2.50886	0.36013	1.60534
51	OPTN	YBR244W	186	8.9112	2.40389	0.248413	1.80673
61	OPTN	YMR179W	9	0.431187	2.35549	0.573959	1.00354
71	OPTN	YDR146C	50	2.39548	2.25788	0.330231	1.51226
81	OPTN	YDR248C	32	1.53311	2.19239	0.422472	1.26617
91	OPTN	YML003W	38	1.82057	2.1493	0.326999	1.44648
101	OPTN	YNL307C	20	0.958194	2.10374	0.450095	1.15686
102	OPTN	YMR143W	10	0.479097	2.10005	0.610062	0.818889
111	OPTN	YBL062W	37	1.77266	2.03554	0.378976	1.26412
121	OPTN	YJL112W	121	5.79707	1.98425	0.237874	1.51225
131	OPTN	YPL111W	17	0.814465	1.93023	0.477593	1.00836
141	OPTN	YOL083W	23	1.10192	1.89214	0.47658	0.990383
151	OPTN	YJR100C	49	2.34757	1.82284	0.396495	1.10009
161	OPTN	YBL060W	181	8.67165	1.76778	0.248983	1.32763
162	OPTN	YML097C	19	0.910284	1.7615	0.476974	0.921309
171	OPTN	YBR231C	30	1.43729	1.73325	0.544944	0.788726
181	OPTN	YOR013W	46	2.20385	1.6984	0.403699	1.01276
191	OPTN	YEL057C	69	3.30577	1.65777	0.379354	1.02889
201	OPTN	YPL087W	30	1.43729	1.62266	0.394648	0.982278
211	OPTN	YHL002W	156	7.47391	1.59138	0.330182	1.06593
212	OPTN	YEL004W	68	3.25786	1.58916	0.449932	0.874143
221	OPTN	YIL156W	67	3.20995	1.55483	0.491643	0.790407
222	OPTN	YPL201C	42	2.01221	1.55458	0.379735	0.964248
232	OPTN	YBR226C	59	2.82667	1.51588	0.360534	0.969356
241	OPTN	YDR128W	82	3.92859	1.49554	0.311562	1.02958
252	OPTN	YPL072W	22	1.05401	1.45098	0.526153	0.687545
261	OPTN	YER187W	9	0.431187	1.40899	0.67552	0.457187
271	OPTN	YMR157C	41	1.9643	1.38354	0.471116	0.731733
281	OPTN	YJL171C	52	2.4913	1.34218	0.503093	0.66694
291	OPTN	YBR033W	57	2.73085	1.31186	0.476737	0.686446
301	OPTN	YJL048C	73	3.49741	1.28957	0.534176	0.600714
302	OPTN	YLL044W	38	1.82057	1.28749	0.559425	0.567237
311	OPTN	YCL033C	27	1.29356	1.26765	0.526449	0.600298
321	OPTN	YNL226W	7	0.335368	1.23359	0.828703	0.21131
331	OPTN	YDR217C	14	0.670736	1.20635	0.733738	0.321205
341	OPTN	YER038W-A	46	2.20385	1.19026	0.426814	0.682241
351	OPTN	YML123C	48	2.29966	1.16345	0.495178	0.587337
361	OPTN	YBR229C	76	3.64114	1.13832	0.3855	0.699496
371	OPTN	YNL117W	33	1.58102	1.11842	0.603154	0.443839
381	OPTN	YIL154C	11	0.527006	1.10988	0.722991	0.307447
391	OPTN	YNL300W	15	0.718645	1.09276	0.715937	0.310413
401	OPTN	YCL069W	28	1.34147	1.06876	0.713669	0.306018
411	OPTN	YPL108W	12	0.574916	1.05917	0.764825	0.249091
421	OPTN	YOR090C	68	3.25786	1.02747	0.471686	0.542825
431	OPTN	YML119W	55	2.63503	1.00185	0.670741	0.32987
441	OPTN	YDL199C	67	3.20995	0.984091	0.485519	0.506296
451	OPTN	YMR154C	150	7.18645	0.964293	0.351814	0.625042
461	OPTN	YHR160C	11	0.527006	0.937681	0.819111	0.169616
471	OPTN	YHR171W	23	1.10192	0.915886	0.74949	0.229438
481	OPTN	YER074W	17	0.814465	0.879635	0.654727	0.303714
491	OPTN	YHR139C	20	0.958194	0.851853	0.758084	0.206077
501	OPTN	YER087C-A	39	1.86848	0.835845	0.534748	0.388878
511	OPTN	YLR043C	47	2.25175	0.819254	0.693037	0.25148
521	OPTN	YOR285W	54	2.58712	0.798438	0.733507	0.212778
531	OPTN	YOL003C	16	0.766555	0.783926	0.785847	0.16788
541	OPTN	YJL099W	43	2.06012	0.759731	0.679901	0.243189
551	OPTN	YDL134C	28	1.34147	0.734407	0.825713	0.127998

## Sheet: OPTN Enhancer
Supplemental Table 3. List of toxicity modifiers tested by yeast spot assays.
Rank	Query (OMIM)	Subject (yeast gene deletion)	Barcode counts	Normalized barcode counts	Z-score	Error rate	Max Z-score
11	OPTN	YIL069C	9	0.431187	-1.88458	0.180906	-1.54365
21	OPTN	YOR100C	4	0.191639	-1.76723	0.197095	-1.41892
31	OPTN	YML030W	12	0.574916	-1.6887	0.141498	-1.44976
41	OPTN	YDL188C	28	1.34147	-1.62482	0.196057	-1.30626
61	OPTN	YOR375C	3	0.143729	-1.53382	0.163187	-1.28352
71	OPTN	YBR220C	22	1.05401	-1.50062	0.265415	-1.10233
81	OPTN	YNL074C	142	6.80317	-1.45113	0.204656	-1.15415
101	OPTN	YHR092C	2	0.0958194	-1.4017	0.30145	-0.979156
111	OPTN	YPL185W	29	1.38938	-1.38105	0.216888	-1.08152
121	OPTN	YBR221C	1	0.0479097	-1.35738	0.417148	-0.791153
141	OPTN	YER119C	7	0.335368	-1.3155	0.348397	-0.857187
161	OPTN	YMR278W	15	0.718645	-1.27632	0.208952	-1.00963
171	OPTN	YLL028W	32	1.53311	-1.25567	0.385469	-0.771648
181	OPTN	YNL283C	6	0.287458	-1.23533	0.389364	-0.754334
191	OPTN	YPL139C	2	0.0958194	-1.21383	0.21654	-0.950988
201	OPTN	YPL159C	24	1.14983	-1.19957	0.459066	-0.648888
211	OPTN	YIR004W	1	0.0479097	-1.17247	0.272363	-0.853131
221	OPTN	YOR317W	33	1.58102	-1.16242	0.408859	-0.687155
231	OPTN	YNL314W	5	0.239548	-1.15344	0.323603	-0.780186
241	OPTN	YBL028C	1	0.0479097	-1.13875	0.957502	-0.0483951
251	OPTN	YIL065C	17	0.814465	-1.12372	0.636772	-0.408164
261	OPTN	YNL134C	17	0.814465	-1.10521	0.419823	-0.641215
271	OPTN	YMR170C	32	1.53311	-1.09591	0.252416	-0.819283
281	OPTN	YDR083W	1	0.0479097	-1.07666	0.508258	-0.52944
291	OPTN	YMR280C	4	0.191639	-1.06675	0.227376	-0.824199
301	OPTN	YER172C-A	1	0.0479097	-1.05241	0.0676822	-0.981176
311	OPTN	YOR139C	13	0.622826	-1.04398	0.322756	-0.707029
321	OPTN	YML120C	25	1.19774	-1.03252	0.515782	-0.499965
331	OPTN	YPL116W	15	0.718645	-1.02217	0.220952	-0.796316
341	OPTN	YDL006W	1	0.0479097	-1.00941	0.359955	-0.646065
351	OPTN	YOL042W	1	0.0479097	-0.999771	0.311292	-0.68855
361	OPTN	YML035C-A	10	0.479097	-0.987971	0.364012	-0.628337
371	OPTN	YIL117C	5	0.239548	-0.979142	0.302439	-0.683012
381	OPTN	YML121W	1	0.0479097	-0.964527	0.394851	-0.583682
401	OPTN	YIL133C	5	0.239548	-0.935952	0.507935	-0.460549
411	OPTN	YBR264C	9	0.431187	-0.928407	0.508512	-0.456301
421	OPTN	YHR202W	10	0.479097	-0.91723	0.499293	-0.459263
431	OPTN	YJR142W	26	1.24565	-0.907531	0.592733	-0.369608
461	OPTN	YHL008C	10	0.479097	-0.887623	0.63488	-0.324089
471	OPTN	YLR181C	5	0.239548	-0.875705	0.59397	-0.355562
481	OPTN	YBL008W	4	0.191639	-0.863972	0.525778	-0.409714
491	OPTN	YEL016C	34	1.62893	-0.848924	0.369225	-0.53548
501	OPTN	YAL019W	14	0.670736	-0.838026	0.598797	-0.336219
531	OPTN	YMR040W	5	0.239548	-0.813085	0.712058	-0.234121
541	OPTN	YDR055W	19	0.910284	-0.804945	0.797491	-0.163009
561	OPTN	YOL061W	12	0.574916	-0.78134	0.306427	-0.541917
571	OPTN	YJR146W	3564	170.75	-0.775814	0.172616	-0.641896
581	OPTN	YHR204W	1	0.0479097	-0.769289	0.583519	-0.320394
591	OPTN	YBR214W	4	0.191639	-0.757052	0.623788	-0.284812
611	OPTN	YDL094C	10	0.479097	-0.729821	0.680368	-0.233274
621	OPTN	YLR089C	7	0.335368	-0.723003	0.9411	-0.0425847
631	OPTN	YBR073W	8	0.383277	-0.7119	0.825657	-0.124115
641	OPTN	YDR317W	2	0.0958194	-0.703927	0.689288	-0.218719
651	OPTN	YHR046C	6	0.287458	-0.69149	0.733162	-0.184516
661	OPTN	YCL027W	3	0.143729	-0.68312	0.497991	-0.342932
671	OPTN	YLR173W	6	0.287458	-0.674388	0.957806	-0.0284551
681	OPTN	YNL332W	8	0.383277	-0.665962	0.624115	-0.250325
691	OPTN	YMR101C	6	0.287458	-0.661497	0.846091	-0.10181
701	OPTN	YER062C	9	0.431187	-0.649927	0.790767	-0.135986
711	OPTN	YPL241C	5	0.239548	-0.638223	0.976156	-0.0152179
721	OPTN	YMR182C	17	0.814465	-0.626453	0.860658	-0.0872909
731	OPTN	YBR197C	7	0.335368	-0.619541	0.753664	-0.152615
741	OPTN	YMR294W-A	6	0.287458	-0.604634	0.710664	-0.174943
761	OPTN	YBR147W	44	2.10803	-0.591642	0.40539	-0.351797
781	OPTN	YDL059C	7	0.335368	-0.565494	0.994567	-0.0030721
801	OPTN	YDR124W	38	1.82057	-0.529161	0.827113	-0.0914853
811	OPTN	YIL002C	12	0.574916	-0.508653	0.956454	-0.0221497

## Sheet: ANG Suppressor
Supplemental Table 3. List of toxicity modifiers tested by yeast spot assays.
Rank	Query (OMIM)	Subject (yeast gene deletion)	Barcode counts	Normalized barcode counts	Z-score	Error rate	Min Z-score
1	ANG	YBR015C	5	0.397478	3.45607	0.649499	1.21136
11	ANG	YIL158W	24	1.90789	2.84389	0.35649	1.83007
21	ANG	YEL018W	12	0.953947	2.65302	0.511862	1.29504
31	ANG	YPL019C	10	0.794956	2.47124	0.500107	1.23535
41	ANG	YHR078W	160	12.7193	2.34728	0.221808	1.82664
51	ANG	YBR246W	33	2.62335	2.26628	0.359204	1.45222
61	ANG	YBR216C	19	1.51042	2.18451	0.505947	1.07927
71	ANG	YHR177W	11	0.874451	2.10548	0.53822	0.972269
81	ANG	YOR108W	20	1.58991	2.05195	0.468172	1.09128
91	ANG	YIL159W	23	1.8284	1.98557	0.494515	1.00367
101	ANG	YOR263C	23	1.8284	1.93776	0.487281	0.993524
111	ANG	YHR079C	15	1.19243	1.86907	0.486186	0.960356
121	ANG	YER151C	13	1.03344	1.77782	0.613487	0.687151
131	ANG	YBR264C	16	1.27193	1.71624	0.588278	0.706612
141	ANG	YDR008C	29	2.30537	1.66289	0.451631	0.911877
151	ANG	YIL130W	13	1.03344	1.62695	0.506671	0.802622
161	ANG	YMR106C	21	1.66941	1.58661	0.527976	0.748916
171	ANG	YDL222C	145	11.5269	1.55927	0.311162	1.07409
181	ANG	YOR017W	28	2.22588	1.51116	0.524707	0.718244
191	ANG	YOR047C	31	2.46436	1.47017	0.53278	0.686894
201	ANG	YBR144C	13	1.03344	1.44517	0.715474	0.411188
211	ANG	YOR306C	39	3.10033	1.3908	0.691196	0.429484
221	ANG	YNL289W	18	1.43092	1.36896	0.632633	0.50291
241	ANG	YNL257C	56	4.45175	1.32758	0.618727	0.506172
251	ANG	YPL167C	48	3.81579	1.30211	0.568251	0.562184
261	ANG	YCL008C	11	0.874451	1.28674	0.740524	0.333878
271	ANG	YMR194W	11	0.874451	1.26538	0.940261	0.0755922
281	ANG	YOR304W	16	1.27193	1.21703	0.732464	0.325599
291	ANG	YDL184C	96	7.63157	1.18657	0.733398	0.316343
301	ANG	YMR273C	23	1.8284	1.16121	0.769009	0.268229
311	ANG	YJL049W	35	2.78235	1.11976	0.930974	0.0772927
321	ANG	YDL211C	21	1.66941	1.09381	0.647313	0.385773
331	ANG	YIL076W	19	1.51042	1.06151	0.770167	0.243969
341	ANG	YDR117C	15	1.19243	1.03942	0.966286	0.035043
361	ANG	YDL113C	37	2.94134	0.996983	0.741674	0.257547
371	ANG	YDL134C-A	29	2.30537	0.973395	0.840941	0.154827
381	ANG	YHL003C	44	3.49781	0.935367	0.744968	0.238548
391	ANG	YHL012W	15	1.19243	0.89659	0.90929	0.0813298
401	ANG	YDL189W	89	7.07511	0.846821	0.458656	0.458422
411	ANG	YDL012C	40	3.17982	0.827754	0.707001	0.242531
421	ANG	YBR119W	14	1.11294	0.787182	0.914058	0.0676518

## Sheet: ANG Enhancer
Supplemental Table 3. List of toxicity modifiers tested by yeast spot assays.
Rank	Query (OMIM)	Subject (yeast gene deletion)	Barcode counts	Normalized barcode counts	Z-score	Error rate	Max Z-score
1	ANG	YJL070C	7	0.556469	-2.75309	0.0772841	-2.54032
11	ANG	YMR145C	14	1.11294	-2.20377	0.249134	-1.65474
21	ANG	YHL029C	2	0.158991	-1.87515	0.217218	-1.46783
31	ANG	YPL115C	1	0.0794956	-1.71919	0.17456	-1.41909
41	ANG	YLR134W	1	0.0794956	-1.69631	0.203247	-1.35154
51	ANG	YJL150W	26	2.06688	-1.98497	0.378045	-1.23456
61	ANG	YEL065W	16	1.27193	-1.68368	0.284404	-1.20483
71	ANG	YLR170C	1	0.0794956	-1.40591	0.184843	-1.14604
81	ANG	YIL054W	8	0.635965	-1.47781	0.259991	-1.0936
101	ANG	YDL240W	11	0.874451	-1.50948	0.340534	-0.99545
111	ANG	YPL230W	4	0.317982	-1.45564	0.354527	-0.939576
121	ANG	YML053C	11	0.874451	-1.37611	0.332682	-0.918305
131	ANG	YLR180W	52	4.13377	-1.25618	0.286242	-0.89661
141	ANG	YJL037W	38	3.02083	-1.3606	0.356786	-0.875155
151	ANG	YER118C	4	0.317982	-1.37459	0.382638	-0.848621
161	ANG	YJL186W	4	0.317982	-1.22253	0.32004	-0.831273
171	ANG	YNL068C	7	0.556469	-1.37608	0.415274	-0.80463
181	ANG	YCR020C	2	0.158991	-1.23733	0.360022	-0.791861
191	ANG	YER085C	4	0.317982	-1.21239	0.364194	-0.770848
201	ANG	YER030W	23	1.8284	-1.27755	0.41751	-0.744159
211	ANG	YIL135C	32	2.54386	-1.09828	0.342528	-0.722089
231	ANG	YLR191W	1	0.0794956	-1.04385	0.345042	-0.683679
241	ANG	YDL124W	6	0.476973	-1.06547	0.377281	-0.663486
251	ANG	YBR148W	12	0.953947	-1.1934	0.456268	-0.648887
271	ANG	YBR016W	10	0.794956	-1.28212	0.520991	-0.614148
281	ANG	YOR197W	6	0.476973	-1.16836	0.486142	-0.60037
291	ANG	YPL227C	2	0.158991	-1.1347	0.485588	-0.583706
301	ANG	YHL007C	4	0.317982	-0.971911	0.411917	-0.571564
321	ANG	YBL005W	7	0.556469	-0.999154	0.452516	-0.547021
331	ANG	YAL058W	5	0.397478	-1.05788	0.50096	-0.527926
341	ANG	YLR084C	4	0.317982	-1.06241	0.521306	-0.508571
351	ANG	YDR107C	22	1.7489	-0.719652	0.302581	-0.501898
361	ANG	YPL095C	7	0.556469	-1.2516	0.608648	-0.489815
381	ANG	YOL027C	4	0.317982	-1.0241	0.551668	-0.459137
391	ANG	YNL217W	1	0.0794956	-0.818078	0.451347	-0.448841
401	ANG	YPL053C	2	0.158991	-0.999075	0.566354	-0.433245
411	ANG	YOR081C	11	0.874451	-0.611389	0.31385	-0.419505
421	ANG	YOR190W	2	0.158991	-1.0164	0.602821	-0.403695
431	ANG	YOL048C	3	0.238487	-0.788434	0.504285	-0.390839
441	ANG	YBR214W	2	0.158991	-0.910538	0.600983	-0.36332
451	ANG	YDL168W	34	2.70285	-0.786189	0.557117	-0.34819
461	ANG	YLR190W	1	0.0794956	-0.769253	0.564812	-0.33477
471	ANG	YJR148W	20	1.58991	-0.821459	0.609697	-0.320618
481	ANG	YIL042C	4	0.317982	-0.864758	0.643783	-0.308042
491	ANG	YNL196C	4	0.317982	-0.843912	0.646895	-0.297989
501	ANG	YPL170W	5	0.397478	-0.743879	0.617098	-0.284833
511	ANG	YJL154C	5	0.397478	-1.03391	0.742437	-0.266298
521	ANG	YBL071C	2	0.158991	-0.91296	0.725076	-0.250995
531	ANG	YBL061C	5	0.397478	-0.753622	0.680917	-0.240468
541	ANG	YMR316C-B	9	0.71546	-0.832784	0.725935	-0.228237
551	ANG	YJR095W	13	1.03344	-0.768399	0.713921	-0.219823
561	ANG	YJR113C	2	0.158991	-0.89283	0.77233	-0.20327
571	ANG	YAR029W	14	1.11294	-0.389557	0.511868	-0.190155
581	ANG	YJL094C	27	2.14638	-1.00463	0.82658	-0.174223
591	ANG	YLR042C	7	0.556469	-0.692771	0.763791	-0.163639
601	ANG	YDR144C	16	1.27193	-0.811522	0.82392	-0.142892
611	ANG	YCL014W	57	4.53125	-0.466452	0.719927	-0.13064
621	ANG	YBL086C	37	2.94134	-0.658942	0.814238	-0.122406
631	ANG	YBR217W	39	3.10033	-0.667581	0.829379	-0.113903
641	ANG	YLL043W	9	0.71546	-0.70544	0.8538	-0.103135
661	ANG	YPR004C	7	0.556469	-0.497474	0.864953	-0.0671822
671	ANG	YJL064W	30	2.38487	-0.572103	0.900471	-0.0569409
681	ANG	YOR284W	32	2.54386	-0.642235	0.928534	-0.0458978
691	ANG	YBR235W	25	1.98739	-0.784619	0.953387	-0.0365736
701	ANG	YER139C	8	0.635965	-0.627266	0.965759	-0.0214779

## Sheet: CLINT1 Suppressor
Supplemental Table 3. List of toxicity modifiers tested by yeast spot assays.
Rank	Query (OMIM)	Subject (yeast gene deletion)	Barcode counts	Normalized barcode counts	Z-score	Error rate	Min Z-score
21	CLINT1	YDR056C	53	2.49049	2.27594	0.304237	1.58352
31	CLINT1	YBR104W	32	1.50369	2.03597	0.384595	1.25295
41	CLINT1	YCL069W	35	1.64466	1.96312	0.424728	1.12933
51	CLINT1	YBR182C	18	0.845827	1.84876	0.585462	0.766382
61	CLINT1	YMR109W	64	3.00739	1.82239	0.383533	1.12344
71	CLINT1	YMR153W	71	3.33632	1.76372	0.359634	1.12942
81	CLINT1	YNL321W	59	2.77243	1.69487	0.374484	1.06017
91	CLINT1	YDR110W	71	3.33632	1.61966	0.366321	1.02635
101	CLINT1	YIL067C	22	1.03379	1.57363	0.568064	0.679709
111	CLINT1	YEL047C	75	3.52428	1.53702	0.387846	0.94089
121	CLINT1	YER080W	28	1.31573	1.49048	0.534393	0.69398
131	CLINT1	YNL253W	43	2.02059	1.43951	0.435827	0.812131
141	CLINT1	YHR017W	27	1.26874	1.41559	0.504495	0.70143
151	CLINT1	YMR010W	33	1.55068	1.3468	0.57558	0.571609
161	CLINT1	YDR163W	7	0.328933	1.31809	0.832336	0.220996
171	CLINT1	YMR265C	74	3.47729	1.26513	0.52159	0.60525
181	CLINT1	YER073W	70	3.28933	1.2299	0.461984	0.661708
191	CLINT1	YNL307C	16	0.751846	1.20459	0.692332	0.370616
201	CLINT1	YHR134W	103	4.84001	1.17378	0.402991	0.700755
211	CLINT1	YJL098W	50	2.34952	1.14344	0.520044	0.5488
221	CLINT1	YIR013C	95	4.46409	1.12343	0.43949	0.629695
231	CLINT1	YDR326C	105	4.93399	1.10912	0.250268	0.831539
241	CLINT1	YBR059C	21	0.986799	1.07546	0.654537	0.371534
251	CLINT1	YMR255W	36	1.69165	1.04652	0.76881	0.241944
261	CLINT1	YBR063C	28	1.31573	1.03252	0.636568	0.375251
271	CLINT1	YML057W	33	1.55068	1.0201	0.556042	0.452882
281	CLINT1	YJR087W	63	2.9604	1.00313	0.468532	0.533133
291	CLINT1	YPL247C	14	0.657866	0.982256	0.628922	0.364494
301	CLINT1	YHR125W	19	0.892818	0.968383	0.707052	0.283686
311	CLINT1	YOR011W	75	3.52428	0.948792	0.530381	0.445571
321	CLINT1	YER051W	14	0.657866	0.935324	0.745541	0.238002
331	CLINT1	YOR050C	45	2.11457	0.914997	0.792543	0.189823
341	CLINT1	YMR006C	81	3.80622	0.899989	0.667418	0.299321
351	CLINT1	YIL001W	37	1.73865	0.888089	0.667938	0.294901
361	CLINT1	YER114C	11	0.516894	0.872074	0.96481	0.0306887
371	CLINT1	YMR107W	22	1.03379	0.85991	0.927596	0.0622613
381	CLINT1	YOL065C	44	2.06758	0.845996	0.988572	0.00966825
391	CLINT1	YOR308C	13	0.610875	0.82939	0.93668	0.0525173
401	CLINT1	YJR119C	46	2.16156	0.813069	0.688393	0.253358
411	CLINT1	YPL064C	16	0.751846	0.798645	0.823374	0.141061
421	CLINT1	YDR244W	25	1.17476	0.784943	0.807551	0.151061
431	CLINT1	YOR379C	40	1.87962	0.772155	0.735206	0.204462
441	CLINT1	YLL052C	25	1.17476	0.757009	0.962016	0.0287539
451	CLINT1	YCL023C	147	6.90759	0.742333	0.822235	0.131961
461	CLINT1	YOR346W	27	1.26874	0.724752	0.788903	0.152993
471	CLINT1	YML087C	197	9.25711	0.707774	0.749174	0.177528
481	CLINT1	YPL120W	26	1.22175	0.694696	0.868543	0.0913229
491	CLINT1	YNL101W	89	4.18215	0.686833	0.573062	0.293235
501	CLINT1	YML102W	57	2.67845	0.66643	0.663606	0.224183
511	CLINT1	YOR285W	53	2.49049	0.641232	0.888587	0.0714418

## Sheet: CLINT1 Enhancer
Supplemental Table 3. List of toxicity modifiers tested by yeast spot assays.
Rank	Query (OMIM)	Subject (yeast gene deletion)	Barcode counts	Normalized barcode counts	Z-score	Error rate	Max Z-score
11	CLINT1	YJL210W	3	0.140971	-2.20375	0.107911	-1.96594
21	CLINT1	YMR106C	3	0.140971	-1.89382	0.115299	-1.67546
31	CLINT1	YER005W	2	0.0939808	-1.72503	0.243941	-1.30422
41	CLINT1	YER093C-A	33	1.55068	-1.60292	0.234383	-1.22722
51	CLINT1	YOR223W	6	0.281942	-1.50077	0.315136	-1.02782
61	CLINT1	YNL206C	1	0.0469904	-1.47071	0.215033	-1.15446
71	CLINT1	YNL082W	15	0.704856	-1.39876	0.254013	-1.04346
81	CLINT1	YDR252W	5	0.234952	-1.32915	0.275468	-0.963011
91	CLINT1	YLR059C	14	0.657866	-1.28839	0.278572	-0.929477
101	CLINT1	YLR049C	1	0.0469904	-1.26483	0.237903	-0.963927
121	CLINT1	YOR371C	5	0.234952	-1.20619	0.339581	-0.796591
131	CLINT1	YPL119C	135	6.3437	-1.19208	0.327163	-0.802078
141	CLINT1	YOR189W	2	0.0939808	-1.17568	0.330955	-0.786579
151	CLINT1	YCR014C	1	0.0469904	-1.1605	0.719029	-0.326067
171	CLINT1	YBR219C	13	0.610875	-1.12345	0.429561	-0.640858
181	CLINT1	YMR278W	18	0.845827	-1.10406	0.257581	-0.819672
191	CLINT1	YPL071C	1	0.0469904	-1.08485	0.235277	-0.829613
201	CLINT1	YDR116C	1	0.0469904	-1.07138	0.536738	-0.496331
211	CLINT1	YOR234C	1	0.0469904	-1.06279	0.452767	-0.581593
221	CLINT1	YHR031C	3	0.140971	-1.04352	0.372629	-0.654675
231	CLINT1	YCL051W	7	0.328933	-1.03251	0.476174	-0.540854
241	CLINT1	YPL167C	44	2.06758	-1.01605	0.422786	-0.586477
251	CLINT1	YIL124W	32	1.50369	-1.00358	0.453012	-0.548945
271	CLINT1	YPL081W	12	0.563885	-0.982148	0.43198	-0.557879
281	CLINT1	YPL030W	14	0.657866	-0.966954	0.284535	-0.691822
311	CLINT1	YDL046W	12	0.563885	-0.933392	0.375532	-0.582874
321	CLINT1	YDL040C	1	0.0469904	-0.917886	0.78321	-0.198989
331	CLINT1	YBR031W	1	0.0469904	-0.910522	0.555073	-0.405116
351	CLINT1	YJL105W	6	0.281942	-0.884479	0.360577	-0.565556
361	CLINT1	YDR289C	1	0.0469904	-0.872725	0.655173	-0.300939
371	CLINT1	YBR077C	3	0.140971	-0.863033	0.533079	-0.402969
381	CLINT1	YBR224W	27	1.26874	-0.853135	0.218135	-0.667037
391	CLINT1	YBL019W	4	0.187962	-0.837684	0.641903	-0.299972
411	CLINT1	YOR354C	20	0.939808	-0.809974	0.613127	-0.313357
431	CLINT1	YEL030W	7	0.328933	-0.788929	0.552713	-0.352878
441	CLINT1	YPL174C	2	0.0939808	-0.774722	0.72438	-0.213529
451	CLINT1	YJR150C	55	2.58447	-0.766951	0.468556	-0.407591
461	CLINT1	YDL094C	10	0.469904	-0.758743	0.642871	-0.270969
471	CLINT1	YMR141C	45	2.11457	-0.751223	0.473967	-0.395169
491	CLINT1	YBL107C	2	0.0939808	-0.735386	0.38085	-0.455314
501	CLINT1	YPL073C	12	0.563885	-0.726716	0.544566	-0.330971
511	CLINT1	YCR004C	23	1.08078	-0.716454	0.779489	-0.157986
521	CLINT1	YBR146W	1	0.0469904	-0.707917	0.794041	-0.145802
531	CLINT1	YNL211C	12	0.563885	-0.69772	0.678058	-0.224626
541	CLINT1	YLL061W	25	1.17476	-0.69075	0.645753	-0.244696
551	CLINT1	YHL024W	1	0.0469904	-0.683031	0.217421	-0.534526
561	CLINT1	YDL227C	149	7.00157	-0.675223	0.380024	-0.418622
571	CLINT1	YOR043W	23	1.08078	-0.667404	0.565004	-0.290318
581	CLINT1	YOR359W	5	0.234952	-0.655075	0.615863	-0.251638
601	CLINT1	YDR249C	13	0.610875	-0.633255	0.873884	-0.0798636
611	CLINT1	YPL201C	18	0.845827	-0.626527	0.618544	-0.238993
631	CLINT1	YDL138W	207	9.72701	-0.602277	0.224942	-0.4668
641	CLINT1	YBR157C	6	0.281942	-0.588045	0.956688	-0.0254697
651	CLINT1	YDR157W	31	1.4567	-0.579024	0.87417	-0.0728584
661	CLINT1	YPL135W	13	0.610875	-0.550701	0.66422	-0.184914
671	CLINT1	YBL081W	2	0.0939808	-0.53538	0.923838	-0.0407756
681	CLINT1	YBR207W	19	0.892818	-0.526766	0.727301	-0.143648
691	CLINT1	YPL258C	8	0.375923	-0.517865	0.862116	-0.0714051
701	CLINT1	YBR239C	26	1.22175	-0.49974	0.916967	-0.041495
