# Supplementary material for: Yeast genetic interaction screen of human genes associated with amyotrophic lateral sclerosis: identification of MAP2K5 kinase as a potential drug target
Source: Genome Res. 2017 Sep;27(9):1487–500. doi: 10.1101/gr.211649.116 (PMC5580709; doi:10.1101/gr.211649.116)
Supplement: Supplemental Material [file supp_gr.211649.116_Supplemental_Table_S4.xlsx]

## Sheet: Orthologs
Supplemental Table 4. List of the human orthologs of the yeast toxicity suppressors for the 20 OMIM ORFs
OMIM genes		Yeast genes							Human ortholog genes
Gene names	Function	Subject (yeast gene deletion)	Homology score	Barcode counts	Normalized barcode counts	Z-socre	Error rate	Min Z-score	Ensemble names	Gene names	Function	Homology score
ABCB7	Cell death and survival	YHR018C	1	55	2.75474	2.26404	0.247782	1.70305	ENSP00000378741	ASL	Amino Acid Metabolism	1
ABCB7	Cell death and survival	YER042W	1	22	1.10189	2.01867	0.457656	1.09481	ENSP00000313921	MSRA	Amino Acid Metabolism	1
ABCB7	Cell death and survival	YBL098W	1	66	3.30568	2.14522	0.269327	1.56745	ENSP00000355517	KMO	Amino Acid Metabolism	1
ABCB7	Cell death and survival	YAL044C	1	35	1.75301	4.18703	0.199555	3.35149	ENSP00000319531	GCSH	Amino Acid Metabolism	1
ABCB7	Cell death and survival	YLR099C	1	42	2.10362	2.32536	0.305505	1.61495	ENSP00000216327	ABHD4	Lipid Metabolism	1
ABCB7	Cell death and survival	YDR142C	1	9	0.450775	2.17238	0.507819	1.0692	ENSP00000315680	PEX7	Lipid Metabolism	1
ABCB7	Cell death and survival	YJL062W	1	5	0.250431	2.30665	0.820958	0.412986	ENSP00000311750	PIGG	Lipid Metabolism	1
ABCB7	Cell death and survival	YAR042W	1	35	1.75301	2.42472	0.296662	1.7054	ENSP00000263847	OSBP	Lipid Metabolism	1
ABCB7	Cell death and survival	YER089C	0.46	45	2.25388	1.97122	0.414886	1.15339	ENSP00000342778	PPM1G	Tissue development	1
ABCB7	Cell death and survival	YOL075C	1	24	1.20207	2.2952	0.332758	1.53145	ENSP00000363868	ABCA1	Protein Synthesis	1
ABCB7	Cell death and survival	YDR092W	1	29	1.4525	2.78292	0.333955	1.85355	ENSP00000316176	UBE2N	Protein Synthesis	1
ABCB7	Cell death and survival	YEL012W	1	35	1.75301	2.57134	0.270101	1.87682	ENSP00000347836	UBE2H	Protein Synthesis	1
ABCB7	Cell death and survival	YNL121C	1	14	0.701206	2.04599	0.470888	1.08256	ENSP00000284320	TOMM70A	Molecular transport	1
ABCB7	Cell death and survival	YPR003C	1	34	1.70293	2.18823	0.373527	1.37087	ENSP00000347778	SLC26A8	Molecular transport	1
ABCB7	Cell death and survival	YBR058C	1	30	1.50258	1.96154	0.354426	1.26632	ENSP00000229268	USP5		1
ABCB7	Cell death and survival	YHL010C	1	41	2.05353	2.14914	0.359931	1.3756	ENSP00000330813	BRAP		1
ABCB7	Cell death and survival	YJR058C	1	28	1.40241	2.01246	0.501761	1.00269	ENSP00000263270	AP2S1		1
ABCB7	Cell death and survival	YML096W	1	42	2.10362	2.40712	0.370014	1.51645	ENSP00000260952	ASNSD1		1
ABCB7	Cell death and survival	YDR204W	1	20	1.00172	3.36388	0.316374	2.29964	ENSP00000300452	COQ4		1
ABCB7	Cell death and survival	YOL060C	1	11	0.550947	2.29837	0.540084	1.05706	ENSP00000358894	CNNM2		1
ABCB7	Cell death and survival	YBL037W	1	19	0.951636	2.47337	0.38689	1.51645	ENSP00000327694	AP2A2	Cell death and survival	1
ABCB7	Cell death and survival	YPL268W	1	5	0.250431	1.96303	0.743142	0.504219	ENSP00000244007	PLCG1	Cell death and survival	1
ABCB7	Cell death and survival	YBL022C	1	14	0.701206	2.00042	0.499199	1.00181	ENSP00000353826	LONP1	Cell death and survival	1
ABCB7	Cell death and survival	YOR171C	1	12	0.601034	2.39016	0.527389	1.12962	ENSP00000245222	SPHK2	Cell death and survival	1
ABCB7	Cell death and survival	YOR123C	1	7	0.350603	2.8149	0.592809	1.1462	ENSP00000299601	LEO1		1
ABCB7	Cell death and survival	YIL035C	1	15	0.751292	2.06133	0.441652	1.15094	ENSP00000262506	CSNK2A2	Cell death and survival	1
ABCB7	Cell death and survival	YJR102C	1	18	0.90155	2.10707	0.430097	1.20083	ENSP00000253794	VPS25		1
ABCB7	Cell death and survival	YEL052W	1	38	1.90327	2.15029	0.428471	1.22896	ENSP00000357973	LACE1		1
ABCB7	Cell death and survival	YOL006C	1	17	0.851464	2.13871	0.424989	1.22978	ENSP00000354522	TOP1	Cell death and survival	1
ABCB7	Cell death and survival	YHR176W	1	14	0.701206	2.31198	0.440116	1.29444	ENSP00000236166	FMO6P		1
ABCB7	Cell death and survival	YLR083C	1	29	1.4525	2.30701	0.418696	1.34107	ENSP00000381104	TM9SF4		1
ABCB7	Cell death and survival	YER041W	1	22	1.10189	2.18698	0.384779	1.34548	ENSP00000318977	GEN1		1
ABCB7	Cell death and survival	YER140W	1	40	2.00345	2.20966	0.375972	1.37889	ENSP00000385347	TAPT1		1
ABCB7	Cell death and survival	YJL153C	1	32	1.60276	2.16865	0.358334	1.39155	ENSP00000315147	ISYNA1		1
ABCB7	Cell death and survival	YPL154C	1	44	2.20379	2.2031	0.364832	1.39934	ENSP00000236671	CTSD	Cell death and survival	1
ABCB7	Cell death and survival	YCL008C	1	23	1.15198	2.28012	0.381509	1.41023	ENSP00000251968	TSG101	Cell death and survival	1
ABCB7	Cell death and survival	YOR275C	1	47	2.35405	2.17714	0.339352	1.43832	ENSP00000307387	PDCD6IP	Cell death and survival	1
ABCB7	Cell death and survival	YJR110W	1	62	3.10534	2.09522	0.298674	1.46943	ENSP00000363985	MTMR8	Cell death and survival	1
ABCB7	Cell death and survival	YNL107W	1	16	0.801378	2.54753	0.415611	1.48875	ENSP00000247843	YEASTS4		1
ABCB7	Cell death and survival	YDR009W	0.677	73	3.65629	2.16716	0.304984	1.50621	ENSP00000316632	GALK2		1
ABCB7	Cell death and survival	YBR043C	1	40	2.00345	2.37788	0.320259	1.61634	ENSP00000358515	SLC22A15		1
ABCB7	Cell death and survival	YDR091C	1	10	0.500861	3.0388	0.463566	1.63011	ENSP00000296577	ABCE1	Cell death and survival	1
ABCB7	Cell death and survival	YJR036C	1	29	1.4525	2.46439	0.335297	1.63809	ENSP00000298068	HECTD2		1
ABCB7	Cell death and survival	YBR037C	1	26	1.30224	2.83626	0.368164	1.79205	ENSP00000255390	SCO1		1
ABCB7	Cell death and survival	YMR150C	1	35	1.75301	2.64719	0.285909	1.89034	ENSP00000278200	IMMP1L		1
ABCB7	Cell death and survival	YAL039C	1	23	1.15198	3.75567	0.285061	2.68507	ENSP00000326579	HCCS		1
ABCB7	Cell death and survival	YOR091W	1	64	3.20551	3.98047	0.17635	3.27851	ENSP00000338788	ZC3H15		1
ACVR1	Gene expression	YER151C	1	22	1.17141	2.29814	0.414689	1.34513	ENSP00000219473	USP10	Post translational modification	1
ACVR1	Gene expression	YER098W	1	86	4.57914	2.45217	0.27765	1.77133	ENSP00000282344	USP12	Post translational modification	1
ACVR1	Gene expression	YJR121W	1	11	0.585704	2.34961	0.485428	1.20904	ENSP00000262030	ATP5B	Nucleic acid metabolism	1
ACVR1	Gene expression	YBR227C	1	41	2.18308	2.3928	0.285627	1.70935	ENSP00000300107	CLPX	Nucleic acid metabolism	1
ACVR1	Gene expression	YPL101W	1	16	0.851933	2.2642	0.50122	1.12934	ENSP00000368461	ELP4	Gene expression	1
ACVR1	Gene expression	YDL125C	1	19	1.01167	2.33881	0.374406	1.46315	ENSP00000304229	HINT1	Gene expression	1
ACVR1	Gene expression	YLR113W	1	12	0.63895	2.87627	0.447418	1.58937	ENSP00000229795	MAPK14	Gene expression	1
ACVR1	Gene expression	YDR092W	1	23	1.22465	2.00682	0.438965	1.12589	ENSP00000316176	UBE2N	Protein Synthesis	1
ACVR1	Gene expression	YPL191C	1	24	1.2779	2.17148	0.472057	1.14642	ENSP00000326194	FAM63B		1
ACVR1	Gene expression	YLR070C	1	40	2.12983	2.11244	0.454522	1.15229	ENSP00000267814	SORD		1
ACVR1	Gene expression	YLR176C	1	23	1.22465	2.16699	0.411541	1.27519	ENSP00000254325	RFX1		1
ACVR1	Gene expression	YCL064C	1	31	1.65062	2.15287	0.337669	1.42591	ENSP00000341117	SDSL		1
ACVR1	Gene expression	YMR230W	0.96	21	1.11816	2.43567	0.365246	1.54605	ENSP00000217256			0.722
ACVR1	Gene expression	YLR181C	1	19	1.01167	2.71111	0.401676	1.62212	ENSP00000356602	VTA1		1
ACVR1	Gene expression	YBR177C	0.094	19	1.01167	2.57357	0.359206	1.64913	ENSP00000289119	ABHD3		0.329
ACVR1	Gene expression	YOR291W	1	43	2.28957	2.49049	0.304819	1.73134	ENSP00000256031	ATP13A3		1
ACVR1	Gene expression	YJR084W	1	99	5.27134	2.37014	0.265864	1.74	ENSP00000246505	PCID2		1
ACVR1	Gene expression	YDL161W	0.333	200	10.6492	2.67177	0.116718	2.35993	ENSP00000378985			1
ANG	Protein Synthesis	YOL016C	0.406	20	1.58991	3.15094	0.361556	2.0117	ENSP00000380447	CAMK1	Cell cycle	0.586
ANG	Protein Synthesis	YOR386W	1	12	0.953947	2.28487	0.593507	0.928782	ENSP00000008527	CRY1	Protein Synthesis	1
ANG	Protein Synthesis	YEL071W	0.274	24	1.90789	2.15223	0.479523	1.12018	ENSP00000315351	D2HGDH	Protein Synthesis	1
ANG	Protein Synthesis	YEL071W	0.274	24	1.90789	2.15223	0.479523	1.12018	ENSP00000383580	D2HGDH	Protein Synthesis	1
ANG	Protein Synthesis	YPL132W	1	23	1.8284	2.13501	0.453187	1.16745	ENSP00000299335	COX11	Protein Synthesis	1
ANG	Protein Synthesis	YJR131W	1	40	3.17982	1.9828	0.288534	1.41069	ENSP00000348959	MAN1A2	Protein Synthesis	1
ANG	Protein Synthesis	YNL326C	1	265	21.0663	2.35042	0.15771	1.97973	ENSP00000362465	ZDHHC15	Protein Synthesis	1
ANG	Protein Synthesis	YER157W	1	30	2.38487	2.89261	0.287697	2.06041	ENSP00000258654	COG3	Protein Synthesis	1
ANG	Protein Synthesis	YNL255C	1	72	5.72368	2.95812	0.295019	2.08542	ENSP00000376968	CNBP	Protein Synthesis	1
ANG	Protein Synthesis	YOR039W	1	13	1.03344	2.06146	0.513053	1.00382	ENSP00000382984	CSNK2B	Molecular transport	1
ANG	Protein Synthesis	YJL124C	1	11	0.874451	2.21156	0.48867	1.13084	ENSP00000310596	LSM1	Molecular transport	1
ANG	Protein Synthesis	YBR084C-A	1	4	0.317982	1.98156	0.856862	0.283636	ENSP00000384740			0.806
ANG	Protein Synthesis	YMR121C	1	10	0.794956	2.14012	0.668342	0.709787	ENSP00000309334	RPL15		1
ANG	Protein Synthesis	YBL019W	1	9	0.71546	2.01615	0.645903	0.713911	ENSP00000364126	APEX2		1
ANG	Protein Synthesis	YLR114C	1	10	0.794956	2.01875	0.584601	0.838589	ENSP00000315568	AVL9		1
ANG	Protein Synthesis	YNL252C	1	10	0.794956	2.22712	0.614263	0.859081	ENSP00000312311	MRPL46		1
ANG	Protein Synthesis	YPL109C	1	15	1.19243	2.05117	0.563838	0.894642	ENSP00000072869	ADCK2		1
ANG	Protein Synthesis	YOR286W	1	16	1.27193	2.05962	0.533095	0.961645	ENSP00000357004			1
ANG	Protein Synthesis	YIL159W	1	23	1.8284	1.98557	0.494515	1.00367	ENSP00000247170	DAAM1		1
ANG	Protein Synthesis	YNL136W	1	27	2.14638	2.06313	0.458031	1.11815	ENSP00000359518	MRGBP		1
ANG	Protein Synthesis	YDR054C	1	32	2.54386	2.23249	0.459365	1.20696	ENSP00000263228	UBE2R2		1
ANG	Protein Synthesis	YNL155W	1	28	2.22588	2.10149	0.42446	1.20949	ENSP00000220669	ZFAND1		1
ANG	Protein Synthesis	YDL192W	0.871	13	1.03344	2.41829	0.483755	1.24843	ENSP00000355714			1
ANG	Protein Synthesis	YBR092C	0.874	23	1.8284	2.38311	0.422002	1.37743	ENSP00000361064	MINPP1		1
ANG	Protein Synthesis	YMR023C	1	12	0.953947	2.51432	0.448997	1.3854	ENSP00000351644	GTPBP3		1
ANG	Protein Synthesis	YDR265W	1	32	2.54386	2.3701	0.413759	1.38945	ENSP00000288774	PEX10		1
ANG	Protein Synthesis	YER041W	1	15	1.19243	2.50766	0.437782	1.40986	ENSP00000318977	GEN1		1
ANG	Protein Synthesis	YER176W	1	20	1.58991	2.26842	0.371837	1.42494	ENSP00000360817	ZNFX1		1
ANG	Protein Synthesis	YBL002W	1	16	1.27193	2.46962	0.422533	1.42612	ENSP00000342886	HIST1H2BJ		1
ANG	Protein Synthesis	YJL060W	1	81	6.43914	2.37126	0.33252	1.58277	ENSP00000260508	CCBL2		1
ANG	Protein Synthesis	YLR038C	1	19	1.51042	2.60993	0.347879	1.70199	ENSP00000376037	COX6B1		1
ANG	Protein Synthesis	YJL126W	1	23	1.8284	2.69592	0.329424	1.80782	ENSP00000356988	NIT1		1
ANG	Protein Synthesis	YBR172C	1	184	14.6272	2.31972	0.171272	1.92242	ENSP00000275732	GIGYF1		1
APOL1	Molecular transport	YLL039C	1	22	1.32282	2.33607	0.368142	1.47607	ENSP00000344818	UBC	Cell cycle	1
APOL1	Molecular transport	YBR046C	1	56	3.36718	2.65607	0.262324	1.95932	ENSP00000238721	TP53I3	Nucleic acid metabolism	1
APOL1	Molecular transport	YJL045W	0.566	48	2.88615	2.63178	0.323918	1.7793	ENSP00000264932	SDHA	Lipid Metabolism	1
APOL1	Molecular transport	YPL087W	1	32	1.9241	2.79464	0.295461	1.96893	ENSP00000278544	ACER3	Lipid Metabolism	1
APOL1	Molecular transport	YDR026C	1	104	6.25333	2.94868	0.196002	2.37074	ENSP00000333920	TTF1	Gene expression	1
APOL1	Molecular transport	YOR153W	1	15	0.901922	2.09986	0.434038	1.18844	ENSP00000371818	ABCA3	Molecular transport	1
APOL1	Molecular transport	YOR326W	1	11	0.66141	2.56781	0.504985	1.27111	ENSP00000285039	MYO5B	Molecular transport	1
APOL1	Molecular transport	YHR078W	1	205	12.3263	2.14621	0.20846	1.69881	ENSP00000319673	GPR89A	Molecular transport	1
APOL1	Molecular transport	YAL002W	1	11	0.66141	2.1216	0.547139	0.960788	ENSP00000287546			1
APOL1	Molecular transport	YPL058C	0.296	16	0.96205	2.04521	0.50957	1.00303	ENSP00000342216	ABCA9		0.129
APOL1	Molecular transport	YOR067C	1	23	1.38295	2.05081	0.503821	1.01757	ENSP00000299626	ALG8	Post translational modification	1
APOL1	Molecular transport	YJL053W	1	27	1.62346	2.1101	0.382531	1.30292	ENSP00000281187	VPS26B		1
APOL1	Molecular transport	YJL082W	1	55	3.30705	2.03526	0.340843	1.34156	ENSP00000306598	TTC39C		1
APOL1	Molecular transport	YHR132C	1	25	1.5032	2.43823	0.444317	1.35488	ENSP00000222482	CPA4		1
APOL1	Molecular transport	YBL024W	1	81	4.87038	1.97214	0.308438	1.36386	ENSP00000264670	NSUN2		1
APOL1	Molecular transport	YPL191C	1	24	1.44308	2.81144	0.410536	1.65725	ENSP00000326194	FAM63B		1
APOL1	Molecular transport	YIL001W	1	46	2.76589	2.97807	0.281467	2.13984	ENSP00000232744	ABTB1		1
BMP15	Tissue development	YBR018C	1	39	2.08457	3.31342	0.272089	2.41188	ENSP00000368119	GALT	Nucleic acid metabolism	1
BMP15	Tissue development	YIL120W	0.072	421	22.5027	4.53867	0.081842	4.16722	ENSP00000245407	SLC22A5	Nucleic acid metabolism	0.172
BMP15	Tissue development	YBL098W	1	60	3.20703	2.0071	0.292759	1.4195	ENSP00000355517	KMO	Amino Acid Metabolism	1
BMP15	Tissue development	YOR120W	1	10	0.534505	2.37092	0.512764	1.1552	ENSP00000312606	AKR1A1	Lipid Metabolism	1
BMP15	Tissue development	YML054C	1	83	4.43639	3.42757	0.170093	2.84456	ENSP00000368066	HAO1	Lipid Metabolism	1
BMP15	Tissue development	YER141W	1	19	1.01556	2.40702	0.432173	1.36677	ENSP00000016171	COX15	Protein Synthesis	1
BMP15	Tissue development	YHR047C	1	57	3.04668	3.72252	0.181052	3.04855	ENSP00000320324	NPEPPS	Protein Synthesis	1
BMP15	Tissue development	YBL079W	1	8	0.427604	2.2489	0.653559	0.779112	ENSP00000231498	NUP155	Molecular transport	1
BMP15	Tissue development	YOR326W	1	11	0.587956	2.09442	0.551609	0.939122	ENSP00000285039	MYO5B	Molecular transport	1
BMP15	Tissue development	YMR026C	1	9	0.481055	1.9624	0.606867	0.771485	ENSP00000225873	PEX12		1
BMP15	Tissue development	YHR189W	1	23	1.22936	1.98358	0.498342	0.995078	ENSP00000334277			1
BMP15	Tissue development	YBR173C	1	9	0.481055	2.40228	0.570231	1.03242	ENSP00000370222	POMP	Cell death and survival	1
BMP15	Tissue development	YOR290C	1	10	0.534505	2.26932	0.540869	1.04191	ENSP00000350720	SMARCA4	Cell death and survival	1
BMP15	Tissue development	YBR170C	1	32	1.71042	2.00448	0.400468	1.20175	ENSP00000363879	NPLOC4		1
BMP15	Tissue development	YNL148C	1	6	0.320703	2.93588	0.566944	1.2714	ENSP00000221855	TBCB		1
BMP15	Tissue development	YBR043C	1	35	1.87077	2.06298	0.368498	1.30277	ENSP00000358515	SLC22A15		1
BMP15	Tissue development	YBL056W	1	20	1.06901	2.42564	0.430991	1.38021	ENSP00000342778	PPM1G	Cell death and survival	1
BMP15	Tissue development	YDR121W	1	33	1.76387	2.51707	0.382784	1.55358	ENSP00000363284	POLE3		1
BMP15	Tissue development	YJR110W	1	60	3.20703	2.25425	0.291062	1.59812	ENSP00000363985	MTMR8	Cell death and survival	1
BMP15	Tissue development	YHR181W	1	31	1.65697	2.46198	0.329858	1.64988	ENSP00000272438	TEX261	Cell death and survival	1
BMP15	Tissue development	YBR048W	1	12	0.641406	3.09684	0.434217	1.75214	ENSP00000270625	RPS11		1
BMP15	Tissue development	YDR128W	1	89	4.7571	2.37006	0.227559	1.83073	ENSP00000205064			1
BMP15	Tissue development	YNL075W	1	19	1.01556	2.89094	0.338077	1.91358	ENSP00000259239	IMP4		1
BMP15	Tissue development	YOR253W	1	51	2.72598	2.96252	0.345132	1.94006	ENSP00000240922	NAA50		1
BMP15	Tissue development	YML121W	1	13	0.694857	3.58523	0.381518	2.2174	ENSP00000369899	RRAGA	Cell death and survival	1
BMP15	Tissue development	YJL101C	1	61	3.26048	3.55478	0.209268	2.81087	ENSP00000229416	GCLC	Cell death and survival	1
BMP15	Tissue development	YER172C	1	82	4.38294	3.45276	0.174833	2.8491	ENSP00000317123	SNRNP20		1
BMP15	Tissue development	YDR107C	0.665	172	9.19349	3.50371	0.114621	3.10211	ENSP00000381104	TM9SF4		1
BMP15	Tissue development	YDR084C	1	106	5.66576	3.83272	0.163733	3.20518	ENSP00000305654	TVP23B		1
BMP15	Tissue development	YNL201C	1	102	5.45195	4.57626	0.138225	3.9437	ENSP00000337125	SMEK1		1
BMP15	Tissue development	YBR034C	1	74	3.95534	4.63231	0.13486	4.0076	ENSP00000246789			1
BMP15	Tissue development	YDL230W	1	181	9.67455	4.62061	0.104423	4.13811	ENSP00000311857	PTPN2	Cell death and survival	1
CALCR	Cell death and survival	YHL033C	0.967	4	0.529631	2.59081	0.900591	0.257549	ENSP00000361076	RPL7A	Cell cycle	1
CALCR	Cell death and survival	YIL155C	1	14	1.85371	2.18285	0.494908	1.10254	ENSP00000308610	GPD2	Nucleic acid metabolism	1
CALCR	Cell death and survival	YOL049W	1	4	0.529631	1.99511	0.752051	0.494684	ENSP00000216951	GSS	Amino Acid Metabolism	1
CALCR	Cell death and survival	YOR375C	0.872	12	1.58889	2.28222	0.533451	1.06477	ENSP00000327589	GLUD2	Amino Acid Metabolism	1
CALCR	Cell death and survival	YNL325C	1	16	2.11852	2.53608	0.48388	1.30892	ENSP00000230124	FIG4	Lipid Metabolism	1
CALCR	Cell death and survival	YPL103C	1	15	1.98611	3.07026	0.483659	1.5853	ENSP00000340093	NAPEPLD	Lipid Metabolism	1
CALCR	Cell death and survival	YPL259C	1	18	2.38334	2.72771	0.479347	1.42019	ENSP00000291439	AP1M1	Molecular transport	1
CALCR	Cell death and survival	YJR106W	1	134	17.7426	1.97918	0.250883	1.48264	ENSP00000202831	SLC24A6	Molecular transport	1
CALCR	Cell death and survival	YNL308C	1	3	0.397223	2.5052	0.935786	0.160869	ENSP00000320917	KRI1		1
CALCR	Cell death and survival	YDR162C	1	9	1.19167	2.23711	0.76737	0.52042	ENSP00000269886	SH3GL1	Cell morphology	1
CALCR	Cell death and survival	YAR003W	1	6	0.794446	1.98566	0.709147	0.577537	ENSP00000264515	RBBP5		1
CALCR	Cell death and survival	YPL154C	1	16	2.11852	1.99996	0.634863	0.730259	ENSP00000236671	CTSD	Cell death and survival	1
CALCR	Cell death and survival	YOR267C	0.171	7	0.926854	2.4032	0.677976	0.773888	ENSP00000363761	EPHB2	Cell death and survival	0.524
CALCR	Cell death and survival	YMR009W	1	13	1.7213	2.20407	0.620861	0.835651	ENSP00000333666	ADI1	Cell death and survival	1
CALCR	Cell death and survival	YIL013C	0.188	13	1.7213	2.00797	0.561038	0.881424	ENSP00000342216	ABCA9		0.129
CALCR	Cell death and survival	YJR031C	1	19	2.51575	1.9878	0.512585	0.968885	ENSP00000359000	GBF1	Cell morphology	1
CALCR	Cell death and survival	YML061C	1	4	0.529631	3.16883	0.687422	0.990504	ENSP00000328174	PIF1		1
CALCR	Cell death and survival	YHR176W	1	6	0.794446	2.81155	0.620916	1.06581	ENSP00000236166	FMO6P		1
CALCR	Cell death and survival	YMR127C	1	18	2.38334	2.45438	0.536235	1.13825	ENSP00000259021	KAT7	Cell death and survival	1
CALCR	Cell death and survival	YML056C	1	19	2.51575	2.55035	0.528025	1.2037	ENSP00000345096	IMPDH1	Cell death and survival	1
CALCR	Cell death and survival	YDL079C	0.239	15	1.98611	2.82072	0.568807	1.21627	ENSP00000222330	GSK3A	Cell death and survival	1
CALCR	Cell death and survival	YNL293W	0.354	17	2.25093	2.50547	0.491775	1.27334	ENSP00000364580	GRTP1		1
CALCR	Cell death and survival	YMR190C	1	6	0.794446	3.18638	0.583094	1.32842	ENSP00000347232	BLM	Cell death and survival	1
CALCR	Cell death and survival	YPL162C	1	10	1.32408	2.8487	0.529461	1.34043	ENSP00000310180			1
CALCR	Cell death and survival	YPL149W	1	21	2.78056	2.4376	0.421187	1.41091	ENSP00000343313	ATG5	Cell death and survival	1
CALCR	Cell death and survival	YLR097C	1	22	2.91297	2.96949	0.489463	1.51603	ENSP00000244426	FBXO9		1
CALCR	Cell death and survival	YPL140C	0.452	5	0.662038	3.68485	0.585258	1.52826	ENSP00000178640	MAP2K5	Cell death and survival	1
CALCR	Cell death and survival	YMR226C	1	17	2.25093	3.12923	0.432698	1.77522	ENSP00000251312	DHRS11		1
CALCR	Cell death and survival	YJR125C	1	6	0.794446	3.90695	0.523432	1.86193	ENSP00000270460	EPN1		1
CALCR	Cell death and survival	YAL036C	1	27	3.57501	2.99936	0.36318	1.91006	ENSP00000329715	DRG1		1
CALCR	Cell death and survival	YEL037C	1	11	1.45648	3.39092	0.426773	1.94377	ENSP00000350708	RAD23B	Cell death and survival	1
CALCR	Cell death and survival	YDL190C	1	23	3.04538	3.26292	0.401789	1.95191	ENSP00000343001	UBE4B	Cell death and survival	1
CALCR	Cell death and survival	YAL015C	1	23	3.04538	3.18915	0.365255	2.0243	ENSP00000219066	NTHL1		1
CALCR	Cell death and survival	YHR106W	1	25	3.31019	3.30434	0.330945	2.21079	ENSP00000382120	AIFM3	Cell death and survival	1
CALCR	Cell death and survival	YHR029C	1	9	1.19167	3.98892	0.436942	2.24599	ENSP00000351619	PBLD		1
CALCR	Cell death and survival	YPL216W	0.094	15	1.98611	3.62375	0.367564	2.29179	ENSP00000371859	BAZ1A	Cell death and survival	0.078
CALCR	Cell death and survival	YDR059C	0.647	61	8.07687	3.31915	0.281414	2.38509	ENSP00000222402	UBE2D4		1
CALCR	Cell death and survival	YOR016C	0.625	31	4.10464	3.5946	0.277797	2.59603	ENSP00000214869	TMED1		0.424
CALCR	Cell death and survival	YBL072C	1	13	1.7213	4.14877	0.370016	2.61366	ENSP00000361288			1
CFH	Cell death and survival	YCR005C	0.46	15	1.06625	1.97076	0.597833	0.792576	ENSP00000342056	CS	Nucleic acid metabolism	1
CFH	Cell death and survival	YOR330C	1	8	0.568664	1.97206	0.539238	0.908649	ENSP00000268124	POLG	Nucleic acid metabolism	1
CFH	Cell death and survival	YBR175W	1	18	1.27949	2.07771	0.488361	1.06303	ENSP00000351446	WDR5	Nucleic acid metabolism	1
CFH	Cell death and survival	YHR013C	1	4	0.284332	2.95536	0.756834	0.718644	ENSP00000359032	NAA10	Amino Acid Metabolism	1
CFH	Cell death and survival	YPL259C	1	29	2.06141	1.98253	0.45204	1.08634	ENSP00000291439	AP1M1	Molecular transport	1
CFH	Cell death and survival	YLR188W	1	30	2.13249	2.23546	0.46684	1.19186	ENSP00000355637	ABCB10	Molecular transport	1
CFH	Cell death and survival	YLR092W	1	17	1.20841	2.43507	0.497626	1.22331	ENSP00000355384	SLC26A11	Molecular transport	1
CFH	Cell death and survival	YOR039W	1	16	1.13733	2.44176	0.429752	1.39241	ENSP00000382984	CSNK2B	Molecular transport	1
CFH	Cell death and survival	YMR242C	1	7	0.497581	2.1495	0.767045	0.500737	ENSP00000383883			0.544
CFH	Cell death and survival	YDR165W	1	5	0.355415	2.33317	0.746117	0.592353	ENSP00000328671	WDR4		1
CFH	Cell death and survival	YJL095W	1	15	1.06625	2.07731	0.592303	0.846912	ENSP00000300647			1
CFH	Cell death and survival	YIL148W	1	12	0.852996	2.28428	0.533544	1.06552	ENSP00000386142			1
CFH	Cell death and survival	YAL022C	1	23	1.63491	1.98966	0.442455	1.10932	ENSP00000362285	SLC29A3		1
CFH	Cell death and survival	YJR094W-A	1	25	1.77708	2.24964	0.447384	1.24319	ENSP00000346793			0.345
CFH	Cell death and survival	YBL003C	1	19	1.35058	2.13159	0.405586	1.26705	ENSP00000358155	HIST2H2AA3		1
CFH	Cell death and survival	YMR020W	1	68	4.83365	1.99221	0.351449	1.29205	ENSP00000367309	MAOB	Cell death and survival	1
CFH	Cell death and survival	YER166W	0.605	16	1.13733	2.49394	0.481917	1.29207	ENSP00000273859	ATP10D		1
CFH	Cell death and survival	YML063W	1	7	0.497581	3.09571	0.553388	1.38258	ENSP00000346050	RPS3A	Cell death and survival	1
CFH	Cell death and survival	YOR328W	0.691	64	4.54931	2.2411	0.371616	1.40827	ENSP00000342216	ABCA9		0.129
CFH	Cell death and survival	YBL024W	1	70	4.97581	2.08898	0.319278	1.42202	ENSP00000264670	NSUN2		1
CFH	Cell death and survival	YHR181W	1	23	1.63491	2.40243	0.386264	1.47446	ENSP00000272438	TEX261	Cell death and survival	1
CFH	Cell death and survival	YDL051W	1	41	2.9144	2.50532	0.358702	1.60666	ENSP00000299213	LARP6		1
CFH	Cell death and survival	YJL068C	1	81	5.75773	2.45415	0.313975	1.68361	ENSP00000367992	ESD		1
CFH	Cell death and survival	YLR085C	1	18	1.27949	2.87677	0.384015	1.77205	ENSP00000188312	ACTR6		1
CFH	Cell death and survival	YML022W	1	26	1.84816	2.75107	0.336591	1.82509	ENSP00000367615	APRT	Cell death and survival	1
CFH	Cell death and survival	YPL217C	1	32	2.27466	3.04398	0.336433	2.01989	ENSP00000363642	BMS1		1
CFH	Cell death and survival	YEL064C	1	15	1.06625	3.89263	0.374363	2.43537	ENSP00000387345	SLC38A11		1
CFH	Cell death and survival	YJL079C	1	65	4.6204	4.45807	0.177986	3.66459	ENSP00000260113	PI15		1
CLINT1	Molecular transport	YOR226C	1	19	0.892818	3.0692	0.367553	1.94111	ENSP00000310623	ISCU	Amino Acid Metabolism	1
CLINT1	Molecular transport	YHR203C	1	7	0.328933	2.42724	0.702945	0.721022	ENSP00000362744	RPS4X	Protein Synthesis	1
CLINT1	Molecular transport	YBR104W	1	32	1.50369	2.03597	0.384595	1.25295	ENSP00000352167	SLC25A29	Molecular transport	1
CLINT1	Molecular transport	YIL121W	0.061	36	1.69165	2.34286	0.28465	1.67597	ENSP00000375989	SLC22A3	Molecular transport	0.155
CLINT1	Molecular transport	YBR009C	1	6	0.281942	2.7362	0.76949	0.630721	ENSP00000376669			1
CLINT1	Molecular transport	YMR315W	1	80	3.75923	2.02032	0.34025	1.3329	ENSP00000221403	DHDH		1
CLINT1	Molecular transport	YPL006W	1	11	0.516894	2.68475	0.476832	1.40458	ENSP00000269228	NPC1	Cell death and survival	1
CLINT1	Molecular transport	YER140W	1	43	2.02059	2.25396	0.358824	1.44519	ENSP00000385347	TAPT1		1
CLINT1	Molecular transport	YCL045C	1	22	1.03379	2.36332	0.366446	1.49729	ENSP00000364354	EMC1		1
CLINT1	Molecular transport	YPL164C	1	45	2.11457	2.16932	0.286882	1.54698	ENSP00000348020	MLH3		1
CLINT1	Molecular transport	YER156C	1	24	1.12777	2.95106	0.328513	1.9816	ENSP00000267103	C12orf10		1
CLINT1	Molecular transport	YAR018C	1	25	1.17476	3.00429	0.312168	2.06644	ENSP00000355966	NEK2	Cell death and survival	1
CNBP	Protein Synthesis	YIL155C	1	16	1.77087	2.00312	0.482509	1.0366	ENSP00000308610	GPD2	Nucleic acid metabolism	1
CNBP	Protein Synthesis	YJR069C	1	28	3.09902	2.81289	0.371255	1.76859	ENSP00000369456	ITPA	Nucleic acid metabolism	1
CNBP	Protein Synthesis	YDL114W	1	27	2.98834	1.97463	0.473845	1.03896	ENSP00000351035	HSD11B11	Lipid Metabolism	1
CNBP	Protein Synthesis	YAR035W	1	11	1.21747	2.39541	0.510369	1.17287	ENSP00000360541	CPT2	Lipid Metabolism	1
CNBP	Protein Synthesis	YBR260C	1	20	2.21358	2.2714	0.477547	1.1867	ENSP00000347710	OPHN1	Tissue development	1
CNBP	Protein Synthesis	YJL190C	1	11	1.21747	2.05045	0.639176	0.739851	ENSP00000318646	RPS15A	Protein Synthesis	1
CNBP	Protein Synthesis	YDL061C	0.8	7	0.774755	2.90948	0.566896	1.26011	ENSP00000379339	RPS29	Protein Synthesis	1
CNBP	Protein Synthesis	YNL329C	1	29	3.2097	2.69643	0.474942	1.41578	ENSP00000303511	PEX6	Protein Synthesis	1
CNBP	Protein Synthesis	YOR251C	1	8	0.885434	3.48289	0.48328	1.79968	ENSP00000385828	TST	Protein Synthesis	1
CNBP	Protein Synthesis	YOL020W	0.13	10	1.10679	3.04927	0.509399	1.49598	ENSP00000298085	SLC7A3	Molecular transport	0.275
CNBP	Protein Synthesis	YPL134C	0.481	42	4.64853	2.42468	0.37963	1.5042	ENSP00000329452	SLC25A21	Molecular transport	1
CNBP	Protein Synthesis	YOR022C	1	27	2.98834	3.55721	0.375628	2.22102	ENSP00000358071	SEC23IP	Molecular transport	1
CNBP	Protein Synthesis	YBR210W	0.393	3	0.332038	3.07175	0.944061	0.171831	ENSP00000355825			1
CNBP	Protein Synthesis	YDR025W	1	4	0.442717	2.32862	0.842892	0.365845	ENSP00000270625	RPS11		1
CNBP	Protein Synthesis	YMR304W	1	5	0.553396	2.03027	0.805463	0.394962	ENSP00000371310	USP7	Cell death and survival	1
CNBP	Protein Synthesis	YIL045W	0.203	14	1.54951	1.96274	0.704862	0.57928	ENSP00000354717			0.14
CNBP	Protein Synthesis	YDL101C	1	4	0.442717	2.73583	0.772302	0.622943	ENSP00000372023	CHEK2	Cell death and survival	1
CNBP	Protein Synthesis	YBR231C	1	14	1.54951	2.12996	0.692465	0.655035	ENSP00000283882	CFDP1	Cell death and survival	1
CNBP	Protein Synthesis	YIL065C	1	16	1.77087	2.21367	0.703414	0.656542	ENSP00000300738	RRM1	Cell death and survival	1
CNBP	Protein Synthesis	YBL049W	1	8	0.885434	2.25614	0.639623	0.813063	ENSP00000300022	YPEL4		1
CNBP	Protein Synthesis	YIL112W	1	10	1.10679	2.1596	0.612925	0.835926	ENSP00000262457	INVS		1
CNBP	Protein Synthesis	YDR155C	1	10	1.10679	2.17532	0.600767	0.86846	ENSP00000225174	PPIF	Cell death and survival	1
CNBP	Protein Synthesis	YPL079W	0.992	9	0.996113	2.58129	0.63357	0.945865	ENSP00000381903			0.591
CNBP	Protein Synthesis	YML060W	1	17	1.88155	2.0475	0.518208	0.98647	ENSP00000306561	OGG1	Cell death and survival	1
CNBP	Protein Synthesis	YOR308C	1	9	0.996113	2.56036	0.585938	1.06015	ENSP00000310448	SART1		1
CNBP	Protein Synthesis	YOR219C	0.07	14	1.54951	2.21081	0.497112	1.11179	ENSP00000353731	DPP4	Cell death and survival	1
CNBP	Protein Synthesis	YDL188C	1	40	4.42717	2.04567	0.410333	1.20626	ENSP00000384493	PPP2CB	Cell death and survival	1
CNBP	Protein Synthesis	YIL042C	1	12	1.32815	2.57146	0.509887	1.26031	ENSP00000378405	BCKDK	Cell death and survival	1
CNBP	Protein Synthesis	YER096W	1	43	4.75921	2.48319	0.456539	1.34952	ENSP00000372088	RAD51	Cell death and survival	1
CNBP	Protein Synthesis	YLR172C	1	18	1.99223	2.57772	0.468811	1.36926	ENSP00000359123			1
CNBP	Protein Synthesis	YDR256C	1	20	2.21358	2.37875	0.41749	1.38565	ENSP00000241052	CAT	Cell death and survival	1
CNBP	Protein Synthesis	YDR063W	1	47	5.20192	2.30014	0.381385	1.4229	ENSP00000346789	GMFB	Cell death and survival	1
CNBP	Protein Synthesis	YOR140W	1	77	8.5223	2.1428	0.328337	1.43924	ENSP00000303599	HSFY1		1
CNBP	Protein Synthesis	YJR094W-A	1	18	1.99223	2.85242	0.464137	1.52851	ENSP00000346793			0.345
CNBP	Protein Synthesis	YPL065W	1	10	1.10679	2.9874	0.48552	1.53696	ENSP00000366565	VPS28	Cell death and survival	1
CNBP	Protein Synthesis	YBR066C	1	22	2.43494	2.69978	0.429195	1.54105	ENSP00000173785			1
CNBP	Protein Synthesis	YER073W	0.344	38	4.20581	2.52757	0.385016	1.55442	ENSP00000366927	ALDH1B1		1
CNBP	Protein Synthesis	YHL010C	1	21	2.32426	2.79268	0.43435	1.57968	ENSP00000330813	BRAP		1
CNBP	Protein Synthesis	YLR043C	0.606	30	3.32038	2.62838	0.393054	1.59529	ENSP00000363641	TXN	Cell death and survival	1
CNBP	Protein Synthesis	YLL019C	1	18	1.99223	2.84595	0.426278	1.63278	ENSP00000316948	CLK4		1
CNBP	Protein Synthesis	YAL030W	1	23	2.54562	2.84033	0.424478	1.63467	ENSP00000379599			1
CNBP	Protein Synthesis	YER146W	1	15	1.66019	3.00752	0.452822	1.64565	ENSP00000223084	LSM5		1
CNBP	Protein Synthesis	YDR005C	1	15	1.66019	3.0635	0.438869	1.71902	ENSP00000318604	MAF1		1
CNBP	Protein Synthesis	YJL098W	1	30	3.32038	2.8476	0.376038	1.7768	ENSP00000321013			1
CNBP	Protein Synthesis	YBL082C	1	27	2.98834	2.91402	0.368326	1.84071	ENSP00000380793	ALG3		1
CNBP	Protein Synthesis	YOR133W	1	14	1.54951	3.0863	0.392268	1.87564	ENSP00000307940	EEF2	Cell death and survival	1
CNBP	Protein Synthesis	YPL074W	1	78	8.63298	2.87036	0.331745	1.91813	ENSP00000378924	FIGNL1		1
CNBP	Protein Synthesis	YER148W	1	21	2.32426	3.14535	0.351853	2.03865	ENSP00000375942	TBP	Cell death and survival	1
CNBP	Protein Synthesis	YDL168W	1	60	6.64075	2.85433	0.279706	2.05596	ENSP00000296412	ADH5	Cell death and survival	1
CNBP	Protein Synthesis	YPL247C	1	13	1.43883	3.67907	0.375991	2.29577	ENSP00000308344	DCAF7	Cell death and survival	1
DFNA5		YHR203C	1	9	0.29458	1.96222	0.692274	0.603827	ENSP00000362744	RPS4X	Protein Synthesis	1
DFNA5		YCR016W	1	34	1.11286	2.20787	0.345257	1.44559	ENSP00000380286	C7orf50		1
DFNA5		YBR177C	0.094	30	0.981934	2.45619	0.292436	1.73791	ENSP00000289119	ABHD3		0.329
DFNA5		YOR142W	1	115	3.76408	2.24567	0.155197	1.89714	ENSP00000377446	SLCLG1		1
DFNA5		YMR278W	1	104	3.40404	2.36092	0.195282	1.89988	ENSP00000371393	PGM2		1
DFNA5		YHR028C	1	321	10.5067	2.56868	0.138047	2.21408	ENSP00000353731	DPP4	Cell death and survival	1
HSD11B1	Lipid Metabolism	YIL155C	1	22	1.87853	2.2367	0.391448	1.36115	ENSP00000308610	GPD2	Nucleic acid metabolism	1
HSD11B1	Lipid Metabolism	YOR323C	1	14	1.19543	3.21908	0.402873	1.9222	ENSP00000360268	ALDH18A1	Amino Acid Metabolism	1
HSD11B1	Lipid Metabolism	YNL271C	1	8	0.6831	2.61347	0.529442	1.22979	ENSP00000383178	DIAPH3	Protein Synthesis	1
HSD11B1	Lipid Metabolism	YPL081W	0.925	22	1.87853	2.29297	0.438648	1.28716	ENSP00000302896	RPS9	Protein Synthesis	1
HSD11B1	Lipid Metabolism	YEL071W	0.274	24	2.0493	2.52326	0.438784	1.41609	ENSP00000383580	D2HGDH	Protein Synthesis	1
HSD11B1	Lipid Metabolism	YDR244W	1	19	1.62236	1.96736	0.504128	0.975558	ENSP00000379877	PEX5	Molecular transport	1
HSD11B1	Lipid Metabolism	YNL270C	0.185	14	1.19543	2.04904	0.519817	0.983914	ENSP00000298085	SLC7A3	Molecular transport	0.275
HSD11B1	Lipid Metabolism	YCL025C	0.132	6	0.512325	2.57568	0.582473	1.07542	ENSP00000298085	SLC7A3	Molecular transport	0.275
HSD11B1	Lipid Metabolism	YPL195W	1	32	2.7324	2.12579	0.352777	1.37586	ENSP00000347416	AP3D1	Molecular transport	1
HSD11B1	Lipid Metabolism	YOR222W	1	27	2.30546	2.64548	0.356708	1.70182	ENSP00000329452	SLC25A21	Molecular transport	1
HSD11B1	Lipid Metabolism	YDR080W	1	4	0.34155	2.16051	0.898143	0.220064	ENSP00000309457	VPS41	Cell death and survival	1
HSD11B1	Lipid Metabolism	YBR031W	1	5	0.426938	2.56371	0.689393	0.796307	ENSP00000311430			1
HSD11B1	Lipid Metabolism	YDL238C	1	10	0.853875	2.02519	0.592311	0.825649	ENSP00000351170	GDA	Cell death and survival	1
HSD11B1	Lipid Metabolism	YDR214W	1	26	2.22008	2.00826	0.565888	0.871811	ENSP00000216479	AHSA1	Cell death and survival	1
HSD11B1	Lipid Metabolism	YOL027C	1	14	1.19543	2.00148	0.554725	0.891207	ENSP00000305653	LETM1	Cell death and survival	1
HSD11B1	Lipid Metabolism	YOR307C	1	12	1.02465	2.09476	0.570947	0.898763	ENSP00000387152	SLC35E1		1
HSD11B1	Lipid Metabolism	YBR223C	1	18	1.53698	1.98453	0.519676	0.953216	ENSP00000377099	TDP1		1
HSD11B1	Lipid Metabolism	YCR011C	1	19	1.62236	2.08882	0.51802	1.00677	ENSP00000237612	ABCG2	Cell death and survival	1
HSD11B1	Lipid Metabolism	YLR048W	0.877	5	0.426938	3.17841	0.680627	1.0151	ENSP00000346067	RPSA	Cell death and survival	1
HSD11B1	Lipid Metabolism	YER174C	1	11	0.939263	2.35651	0.549581	1.06142	ENSP00000330836	GLRX3		1
HSD11B1	Lipid Metabolism	YDR330W	1	5	0.426938	3.08917	0.653268	1.07111	ENSP00000296328	UBXN7		1
HSD11B1	Lipid Metabolism	YAL019W	1	21	1.79314	2.18784	0.486224	1.12406	ENSP00000351947	SMARCAD1		1
HSD11B1	Lipid Metabolism	YJL048C	1	47	4.01321	2.1396	0.455715	1.16455	ENSP00000272638	UBXN4		1
HSD11B1	Lipid Metabolism	YNL097C	1	24	2.0493	2.06427	0.434111	1.16815	ENSP00000320566	ING3	Cell death and survival	1
HSD11B1	Lipid Metabolism	YBR222C	1	21	1.79314	2.34502	0.456648	1.27417	ENSP00000384627	ACSF3		1
HSD11B1	Lipid Metabolism	YPL206C	1	17	1.45159	2.48995	0.467154	1.32676	ENSP00000284116	GDPD1		1
HSD11B1	Lipid Metabolism	YNL092W	1	54	4.61093	2.06123	0.345453	1.34917	ENSP00000366030	C9orf41		1
HSD11B1	Lipid Metabolism	YEL071W	0.274	24	2.0493	2.52326	0.438784	1.41609	ENSP00000315351			1
HSD11B1	Lipid Metabolism	YMR246W	1	19	1.62236	2.51064	0.415851	1.46659	ENSP00000339787	ACSL4	Cell death and survival	1
HSD11B1	Lipid Metabolism	YNL154C	1	14	1.19543	2.62736	0.435638	1.48278	ENSP00000378807	CSNK1G3		1
HSD11B1	Lipid Metabolism	YOR356W	1	9	0.768488	2.97955	0.501457	1.48544	ENSP00000303552	ETFDH		1
HSD11B1	Lipid Metabolism	YOR304W	1	21	1.79314	2.662	0.410618	1.56893	ENSP00000283131	SMARCA5	Cell death and survival	1
HSD11B1	Lipid Metabolism	YOR339C	1	34	2.90318	2.43513	0.340045	1.60708	ENSP00000348838	UBE2C	Cell death and survival	1
HSD11B1	Lipid Metabolism	YDR019C	1	60	5.12325	2.57211	0.372043	1.61517	ENSP00000273588	AMT		1
HSD11B1	Lipid Metabolism	YPL119C	0.389	134	11.4419	2.32333	0.296967	1.63338	ENSP00000353284	DDX3Y		1
HSD11B1	Lipid Metabolism	YEL012W	1	21	1.79314	2.66442	0.342746	1.7512	ENSP00000347836			1
HSD11B1	Lipid Metabolism	YOR090C	1	54	4.61093	2.65552	0.286658	1.89429	ENSP00000379503	PDP1	Cell death and survival	1
HSD11B1	Lipid Metabolism	YOR113W	1	15	1.28081	3.18413	0.395115	1.92603	ENSP00000329357	SP1	Cell death and survival	1
HSD11B1	Lipid Metabolism	YER183C	1	12	1.02465	3.61372	0.424537	2.07956	ENSP00000258874	MTHFS		1
HSD11B1	Lipid Metabolism	YOR134W	0.089	12	1.02465	3.61066	0.372089	2.26717	ENSP00000262444	ARHGP44		0.352
HSD11B1	Lipid Metabolism	YML028W	1	19	1.62236	3.52493	0.339364	2.32869	ENSP00000301522	PRDX2	Cell death and survival	1
HSD11B1	Lipid Metabolism	YER110C	1	18	1.53698	4.2555	0.303863	2.96241	ENSP00000346453	IPO4		1
ICOS	Cell death and survival	YLR032W	1	15	1.16459	2.11663	0.498636	1.06121	ENSP00000376644	HLTF	Nucleic acid metabolism	1
ICOS	Cell death and survival	YBR025C	1	15	1.16459	2.50177	0.502189	1.24541	ENSP00000386350	OLA1	Nucleic acid metabolism	1
ICOS	Cell death and survival	YHR200W	1	11	0.85403	3.69012	0.405977	2.19202	ENSP00000357876	PSMD4	Tissue development	1
ICOS	Cell death and survival	YPL105C	0.166	14	1.08695	2.31039	0.543431	1.05485	ENSP00000362667	GIGYF2	Protein Synthesis	0.386
ICOS	Cell death and survival	YML001W	1	19	1.47514	2.58909	0.369849	1.63152	ENSP00000265062	RAB7A	Molecular transport	1
ICOS	Cell death and survival	YAL029C	0.235	21	1.63042	3.02208	0.36333	1.92406	ENSP00000285039	MYO5B	Molecular transport	1
ICOS	Cell death and survival	YLR181C	1	11	0.85403	1.97881	0.609404	0.772914	ENSP00000356602	VTA1		1
ICOS	Cell death and survival	YLR216C	1	6	0.465834	2.41547	0.67092	0.794884	ENSP00000303754	PPID	Cell death and survival	1
ICOS	Cell death and survival	YJL193W	0.096	14	1.08695	2.09775	0.58448	0.871657	ENSP00000387152	SLC35E1		1
ICOS	Cell death and survival	YPL051W	1	17	1.31986	1.97206	0.536126	0.914786	ENSP00000326884	ARFRP1		1
ICOS	Cell death and survival	YOR357C	1	22	1.70806	2.09599	0.547636	0.94815	ENSP00000230085	SNX3		1
ICOS	Cell death and survival	YDL033C	1	12	0.931669	2.05111	0.525856	0.972521	ENSP00000290846	TRMU		1
ICOS	Cell death and survival	YDR155C	1	14	1.08695	2.10163	0.51737	1.01431	ENSP00000225174	PPIF	Cell death and survival	1
ICOS	Cell death and survival	YBL013W	1	19	1.47514	1.99698	0.485146	1.02815	ENSP00000220058	MTFMT		1
ICOS	Cell death and survival	YMR226C	1	23	1.7857	1.98096	0.468511	1.05286	ENSP00000251312	DHRS11		1
ICOS	Cell death and survival	YNL200C	1	37	2.87264	1.96545	0.462002	1.05741	ENSP00000357218	APOA1BP		1
ICOS	Cell death and survival	YCL037C	0.13	5	0.388195	3.16381	0.663902	1.06335	ENSP00000366871			0.532
ICOS	Cell death and survival	YDR252W	0.226	17	1.31986	2.19699	0.477458	1.14802	ENSP00000369965	BTF3		0.716
ICOS	Cell death and survival	YDR257C	1	14	1.08695	2.28273	0.466564	1.21769	ENSP00000219315	SETD6		1
ICOS	Cell death and survival	YDL082W	0.981	7	0.543473	2.68461	0.539142	1.23722	ENSP00000307889			1
ICOS	Cell death and survival	YNL293W	0.354	27	2.09625	2.15824	0.42362	1.24397	ENSP00000364580	GRTP1		1
ICOS	Cell death and survival	YMR182C	0.073	25	1.94098	2.34532	0.44074	1.31164	ENSP00000331614	IKZF1	Cell death and survival	0.463
ICOS	Cell death and survival	YML110C	1	14	1.08695	2.60234	0.492327	1.32114	ENSP00000288532	COQ5		1
ICOS	Cell death and survival	YIL007C	1	42	3.26084	1.99258	0.329603	1.33582	ENSP00000261817	PSMD9	Cell death and survival	1
ICOS	Cell death and survival	YER078C	1	19	1.47514	2.47053	0.444801	1.37164	ENSP00000349658	XPNPEP3		1
ICOS	Cell death and survival	YLR168C	1	20	1.55278	2.32396	0.409161	1.37308	ENSP00000348206	SLMO2		1
ICOS	Cell death and survival	YEL016C	0.151	56	4.34779	2.07802	0.304142	1.44601	ENSP00000360454	ENPP4		0.299
ICOS	Cell death and survival	YML057W	1	28	2.17389	2.30487	0.370624	1.45063	ENSP00000378323	PPP3CA	Cell death and survival	1
ICOS	Cell death and survival	YML057W	1	28	2.17389	2.30487	0.370624	1.45063	ENSP00000380878	PPP3CC	Cell death and survival	1
ICOS	Cell death and survival	YHR206W	1	10	0.776391	3.08711	0.501558	1.53875	ENSP00000313243	HSF5		1
ICOS	Cell death and survival	YJR070C	1	20	1.55278	2.72839	0.376138	1.70214	ENSP00000250937	DOHH		1
ICOS	Cell death and survival	YDL238C	1	14	1.08695	3.05328	0.422313	1.76384	ENSP00000351170	GDA	Cell death and survival	1
ICOS	Cell death and survival	YBR169C	1	48	3.72667	2.90608	0.359235	1.86212	ENSP00000302961	HSPA4	Cell death and survival	1
ICOS	Cell death and survival	YNL087W	1	56	4.34779	2.63058	0.290231	1.8671	ENSP00000377612	ESYT1		1
ICOS	Cell death and survival	YNL119W	1	11	0.85403	3.36491	0.43042	1.91659	ENSP00000367635	CTU2		1
ICOS	Cell death and survival	YNL305C	1	62	4.81362	3.07404	0.271572	2.23921	ENSP00000258412	TMBIM1		1
LGI	Cell morphology	YBL063W	1	20	1.14193	2.0346	0.530042	0.956178	ENSP00000260731	KIF11	Cell cycle	1
LGI	Cell morphology	YAL017W	0.465	21	1.19903	2.18625	0.446454	1.21019	ENSP00000351475	PASK	Nucleic acid metabolism	1
LGI	Cell morphology	YER081W	1	23	1.31322	2.08597	0.482371	1.07976	ENSP00000358417	PHGDH	Amino Acid Metabolism	1
LGI	Cell morphology	YIL074C	1	185	10.5629	2.25826	0.275545	1.63601	ENSP00000358417	PHGDH	Amino Acid Metabolism	1
LGI	Cell morphology	YMR165C	1	4	0.228387	2.1151	0.87111	0.272614	ENSP00000379406	LPIN1	Lipid Metabolism	1
LGI	Cell morphology	YPL172C	1	16	0.913546	2.24956	0.491753	1.14334	ENSP00000261643	COX10	Protein Synthesis	1
LGI	Cell morphology	YOR245C	1	27	1.54161	2.42617	0.347968	1.58194	ENSP00000198801	MOGAT2	Protein Synthesis	1
LGI	Cell morphology	YBL080C	1	19	1.08484	2.80524	0.37937	1.74102	ENSP00000263985	PET112	Protein Synthesis	1
LGI	Cell morphology	YPL081W	0.925	36	2.05548	2.73381	0.315618	1.87097	ENSP00000302896	RPS9	Protein Synthesis	1
LGI	Cell morphology	YOL002C	1	24	1.37032	2.40605	0.35437	1.55342	ENSP00000349616	ADIPOR2	Molecular transport	1
LGI	Cell morphology	YPL236C	1	13	0.742256	2.7466	0.418311	1.59766	ENSP00000387156	STK16	Molecular transport	1
LGI	Cell morphology	YML104C	1	52	2.96902	2.30041	0.288412	1.63694	ENSP00000242044	SNX13	Molecular transport	1
LGI	Cell morphology	YOR271C	1	36	2.05548	2.6009	0.35943	1.66606	ENSP00000272433	SFXN5	Molecular transport	1
LGI	Cell morphology	YJL180C	1	8	0.456773	1.99375	0.615272	0.767052	ENSP00000304017			1
LGI	Cell morphology	YPL057C	1	10	0.570966	2.23085	0.573063	0.952432	ENSP00000236709	A4GNT		1
LGI	Cell morphology	YIL038C	1	24	1.37032	2.0459	0.484506	1.05465	ENSP00000221232	CNOT3		1
LGI	Cell morphology	YOR304W	1	27	1.54161	1.96467	0.424062	1.13153	ENSP00000283131	SMARCA5	Cell death and survival	1
LGI	Cell morphology	YDR054C	1	43	2.45516	2.03228	0.421964	1.17473	ENSP00000263228	UBE2R2		1
LGI	Cell morphology	YNL067W	1	16	0.913546	2.32808	0.49232	1.18192	ENSP00000346022	RPL9		1
LGI	Cell morphology	YHL036W	0.06	13	0.742256	2.26238	0.467556	1.20459	ENSP00000280612	SLC7A11	Cell death and survival	0.32
LGI	Cell morphology	YDR329C	1	24	1.37032	2.13841	0.407231	1.26759	ENSP00000356563	PEX3		1
LGI	Cell morphology	YNL301C	1	22	1.25613	2.23496	0.431781	1.26995	ENSP00000084795	RPL18		1
LGI	Cell morphology	YAL062W	1	55	3.14031	1.97082	0.335694	1.30923	ENSP00000277865	GLUD1	Cell death and survival	1
LGI	Cell morphology	YBL003C	1	25	1.42742	2.34415	0.340327	1.54638	ENSP00000358155	HIST2H2AA3		1
LGI	Cell morphology	YML038C	1	69	3.93967	2.2296	0.301188	1.55807	ENSP00000361301	SLC35C2		1
LGI	Cell morphology	YIL126W	1	13	0.742256	2.80962	0.430235	1.60082	ENSP00000265773	SMARCA2	Cell death and survival	1
LGI	Cell morphology	YIL126W	1	13	0.742256	2.80962	0.430235	1.60082	ENSP00000350720	SMARCA4	Cell death and survival	1
LGI	Cell morphology	YOR280C	1	55	3.14031	2.36095	0.319664	1.60624	ENSP00000263084	OVCA2		1
LGI	Cell morphology	YIL125W	1	13	0.742256	3.08236	0.452113	1.68878	ENSP00000222673	OGDH	Cell death and survival	1
LGI	Cell morphology	YDR128W	1	83	4.73902	2.35098	0.236471	1.79504	ENSP00000205064			1
LGI	Cell morphology	YBR180W	0.106	48	2.74064	2.54789	0.292914	1.80158	ENSP00000310241	SLC22A13		0.184
LGI	Cell morphology	YOR285W	0.153	65	3.71128	2.62729	0.28893	1.86819	ENSP00000357004			1
LGI	Cell morphology	YHR123W	1	32	1.82709	2.714	0.307404	1.87971	ENSP00000260585	EPT1		1
LGI	Cell morphology	YAL005C	1	42	2.39806	2.94133	0.320667	1.99814	ENSP00000227378			1
LGI	Cell morphology	YPL099C	1	52	2.96902	2.76849	0.256781	2.0576	ENSP00000363191	ROMO1		1
LGI	Cell morphology	YHL017W	0.472	62	3.53999	2.81205	0.256924	2.08957	ENSP00000374484	TMEM87A		0.348
LGI	Cell morphology	YDL024C	0.653	23	1.31322	3.29952	0.31818	2.24968	ENSP00000361064	MINPP1		1
LGI	Cell morphology	YOL011W	0.619	37	2.11258	3.30021	0.307772	2.2845	ENSP00000382434	PLA2G4E		0.303
LGI	Cell morphology	YJR117W	1	957	54.6415	2.65963	0.121034	2.33773	ENSP00000361845	ZMPSTE24	Cell morphology	1
LGI	Cell morphology	YPL220W	1	25	1.42742	3.34649	0.295384	2.35799	ENSP00000363018	RPL10A		1
LYZ	Cell death and survival	YBR181C	1	4	0.271145	2.66556	0.817796	0.485677	ENSP00000369757	RPS6	Cell cycle	1
LYZ	Cell death and survival	YPL174C	1	7	0.474504	2.23782	0.640575	0.804328	ENSP00000303585	CLIP1	Cell cycle	1
LYZ	Cell death and survival	YMR120C	1	15	1.01679	2.26542	0.486448	1.16341	ENSP00000236959	ATIC	Nucleic acid metabolism	1
LYZ	Cell death and survival	YDL019C	0.408	8	0.542291	2.24467	0.609304	0.876983	ENSP00000263847	OSBP	Lipid Metabolism	1
LYZ	Cell death and survival	YMR207C	0.201	26	1.76244	2.41407	0.39563	1.45899	ENSP00000341044	ACACB	Lipid Metabolism	1
LYZ	Cell death and survival	YBR006W	1	21	1.42351	2.81669	0.377255	1.75408	ENSP00000314649	ALDH5A1	Protein Synthesis	1
LYZ	Cell death and survival	YAL026C	1	6	0.406718	2.3638	0.63546	0.861699	ENSP00000371084	ATP8A1	Molecular transport	1
LYZ	Cell death and survival	YBR068C	0.141	37	2.50809	2.10481	0.568174	0.908913	ENSP00000298085	SLC7A3	Molecular transport	0.275
LYZ	Cell death and survival	YNL275W	1	37	2.50809	1.97709	0.433104	1.1208	ENSP00000264485	SLC4A4	Molecular transport	1
LYZ	Cell death and survival	YOL012C	1	4	0.271145	2.4227	0.823318	0.428049	ENSP00000308405	H2AFV		1
LYZ	Cell death and survival	YLR179C	1	11	0.745649	2.01275	0.52958	0.94684	ENSP00000261313	PEBP1	Cell death and survival	1
LYZ	Cell death and survival	YOL031C	1	17	1.15237	2.01623	0.509879	0.988197	ENSP00000378294	SIL1		1
LYZ	Cell death and survival	YPL127C	1	16	1.08458	1.99667	0.503943	0.990464	ENSP00000344504	HIF0		1
LYZ	Cell death and survival	YCL001W	1	18	1.22015	2.16816	0.496699	1.09124	ENSP00000302088	RER1		1
LYZ	Cell death and survival	YJL197W	1	16	1.08458	2.1218	0.485488	1.09169	ENSP00000265560	USP4		1
LYZ	Cell death and survival	YLR025W	1	27	1.83023	2.04821	0.422596	1.18265	ENSP00000217402	CHMP4B	Cell death and survival	1
LYZ	Cell death and survival	YOR157C	1	11	0.745649	2.56144	0.535757	1.18913	ENSP00000259457	PSMB7		1
LYZ	Cell death and survival	YJR088C	1	11	0.745649	2.42884	0.49785	1.21964	ENSP00000220853	EMC2		1
LYZ	Cell death and survival	YPL060W	1	17	1.15237	2.27497	0.458851	1.2311	ENSP00000367637	MRS2	Cell death and survival	1
LYZ	Cell death and survival	YEL009C	1	16	1.08458	2.34556	0.469161	1.24512	ENSP00000303315	JUNB	Cell death and survival	1
LYZ	Cell death and survival	YOR038C	1	17	1.15237	2.48532	0.494122	1.25727	ENSP00000263208	HIRA		1
LYZ	Cell death and survival	YBR058C	1	23	1.55909	2.103	0.390425	1.28194	ENSP00000229268	USP5		1
LYZ	Cell death and survival	YDR083W	1	7	0.474504	3.31061	0.562041	1.44991	ENSP00000254605	RRP8		1
LYZ	Cell death and survival	YHR079C	1	20	1.35573	2.34707	0.381337	1.45204	ENSP00000225768			1
LYZ	Cell death and survival	YJL155C	1	12	0.813436	2.72295	0.466224	1.45345	ENSP00000356047	PFKFB2		1
LYZ	Cell death and survival	YOR265W	1	46	3.11817	2.22096	0.331317	1.48511	ENSP00000369736	TBCA		1
LYZ	Cell death and survival	YMR222C	0.281	40	2.71145	2.44744	0.366739	1.54987	ENSP00000263084	OVCA2		1
LYZ	Cell death and survival	YNL299W	0.401	18	1.22015	2.61036	0.382643	1.61153	ENSP00000350054	PAPD5		0.331
LYZ	Cell death and survival	YDR152W	1	51	3.4571	2.3491	0.312579	1.61482	ENSP00000357579			1
LYZ	Cell death and survival	YHL032C	1	18	1.22015	2.9643	0.448594	1.63453	ENSP00000351706	GK2		1
LYZ	Cell death and survival	YDR098C	0.531	37	2.50809	2.37135	0.309413	1.63762	ENSP00000330836	GLRX3		1
LYZ	Cell death and survival	YBR093C	1	28	1.89802	2.72488	0.346377	1.78105	ENSP00000361064	MINPP1		1
LYZ	Cell death and survival	YNL082W	1	44	2.9826	2.81585	0.298323	1.97582	ENSP00000265849	PMS2	Cell death and survival	1
LYZ	Cell death and survival	YOR126C	1	43	2.91481	2.99359	0.311659	2.06061	ENSP00000314400	IAH1		1
LYZ	Cell death and survival	YPL048W	0.527	41	2.77924	2.93336	0.29472	2.06884	ENSP00000367258			1
LYZ	Cell death and survival	YJR040W	1	23	1.55909	3.34921	0.360143	2.14301	ENSP00000365256	CLCN5		1
LYZ	Cell death and survival	YOR141C	1	15	1.01679	3.53159	0.382005	2.18251	ENSP00000336842	ACTR8		1
LYZ	Cell death and survival	YOR011W	0.185	77	5.21955	3.00073	0.24251	2.27303	ENSP00000342216	ABCA9		0.129
LYZ	Cell death and survival	YOL052C	1	23	1.55909	3.61176	0.343057	2.37272	ENSP00000357880	AMD1		1
MERTK	Post translational modification	YIL006W	1	4	0.352296	1.96507	0.886672	0.222698	ENSP00000297578	SLC25A32	Amino Acid Metabolism	1
MERTK	Post translational modification	YPL001W	1	6	0.528444	2.556	0.590884	1.0457	ENSP00000264108	HAT1	Amino Acid Metabolism	1
MERTK	Post translational modification	YNL239W	1	24	2.11378	2.53801	0.440121	1.42098	ENSP00000378296	BLMH	Amino Acid Metabolism	1
MERTK	Post translational modification	YER081W	1	17	1.49726	2.75359	0.482011	1.42633	ENSP00000358417	PHGDH	Amino Acid Metabolism	1
MERTK	Post translational modification	YLL028W	0.063	41	3.61104	2.31636	0.422527	1.33764	ENSP00000355920	SLC22A2	Lipid Metabolism	0.155
MERTK	Post translational modification	YLR174W	1	9	0.792667	2.21089	0.60817	0.866295	ENSP00000260985	IDH1	Protein Synthesis	1
MERTK	Post translational modification	YIL069C	1	25	2.20185	2.01082	0.486075	1.03341	ENSP00000361435	RPS24	Protein Synthesis	1
MERTK	Post translational modification	YOR245C	1	17	1.49726	2.30124	0.447556	1.27131	ENSP00000198801	MOGAT2	Protein Synthesis	1
MERTK	Post translational modification	YDR272W	1	30	2.64222	2.16629	0.39577	1.30894	ENSP00000380514	HAGH	Protein Synthesis	1
MERTK	Post translational modification	YOR085W	1	14	1.23304	2.40743	0.482889	1.24491	ENSP00000354649	MAGT1	Molecular transport	1
MERTK	Post translational modification	YPL270W	0.084	11	0.968815	2.82901	0.465996	1.5107	ENSP00000355637	ABCB10	Molecular transport	1
MERTK	Post translational modification	YDR335W	1	23	2.0257	2.99329	0.373012	1.87675	ENSP00000381779	XPO5	Molecular transport	1
MERTK	Post translational modification	YOL041C	1	4	0.352296	2.43668	0.832268	0.40871	ENSP00000355565	RBM34		1
MERTK	Post translational modification	YIL018W	1	5	0.44037	2.38257	0.744729	0.6082	ENSP00000262584	RPL8		1
MERTK	Post translational modification	YNL323W	0.15	6	0.528444	2.09602	0.692097	0.645372	ENSP00000347930	TMEM30B		0.287
MERTK	Post translational modification	YPL002C	1	7	0.616518	2.20139	0.679707	0.705089	ENSP00000290330	SNF8		1
MERTK	Post translational modification	YML097C	1	11	0.968815	1.99372	0.585526	0.826343	ENSP00000370208			1
MERTK	Post translational modification	YLR174W	1	9	0.792667	2.21089	0.60817	0.866295	ENSP00000331897	IDH2		1
MERTK	Post translational modification	YLR174W	1	9	0.792667	2.21089	0.60817	0.866295	ENSP00000377168			1
MERTK	Post translational modification	YBL106C	1	12	1.05689	2.02771	0.569387	0.873158	ENSP00000321826	STXBP5		1
MERTK	Post translational modification	YDR284C	1	7	0.616518	2.25223	0.605233	0.889108	ENSP00000314854			1
MERTK	Post translational modification	YHR046C	0.344	11	0.968815	2.12491	0.572538	0.908318	ENSP00000269159	IMPA2		0.424
MERTK	Post translational modification	YIL159W	1	21	1.84956	2.03951	0.509137	1.00112	ENSP00000247170	DAAM1		1
MERTK	Post translational modification	YBR001C	1	6	0.528444	2.80548	0.637617	1.01666	ENSP00000264029	TREH		1
MERTK	Post translational modification	YOL075C	1	13	1.14496	2.11926	0.464511	1.13484	ENSP00000363868	ABCA1	Cell death and survival	1
MERTK	Post translational modification	YJR044C	1	5	0.44037	3.00821	0.62238	1.13596	ENSP00000314625	LEPROTL1		1
MERTK	Post translational modification	YPL120W	1	21	1.84956	2.24236	0.447203	1.23957	ENSP00000355231	BECN1	Cell death and survival	1
MERTK	Post translational modification	YJL052W	0.728	16	1.40918	2.33484	0.446846	1.29152	ENSP00000229239	GAPDH	Cell death and survival	1
MERTK	Post translational modification	YIL035C	1	10	0.880741	2.6612	0.488054	1.36239	ENSP00000262506	CSNK2A2	Cell death and survival	1
MERTK	Post translational modification	YNL092W	1	53	4.66793	2.12526	0.342239	1.39791	ENSP00000366030	C9orf41		1
MERTK	Post translational modification	YBR231C	1	20	1.76148	2.87929	0.487626	1.47527	ENSP00000283882	CFDP1	Cell death and survival	1
MERTK	Post translational modification	YPL170W	1	19	1.67341	2.46069	0.394341	1.49034	ENSP00000217971	PGRMC1	Cell death and survival	1
MERTK	Post translational modification	YBL002W	1	15	1.32111	2.62984	0.425264	1.51146	ENSP00000342886	HIST1H2BJ		1
MERTK	Post translational modification	YDR109C	1	35	3.08259	2.59542	0.391832	1.57845	ENSP00000360262	FGGY		1
MERTK	Post translational modification	YEL013W	1	14	1.23304	2.83306	0.431232	1.61135	ENSP00000263946	PKP1		1
MERTK	Post translational modification	YER007C-A	1	53	4.66793	2.3886	0.323869	1.615	ENSP00000360365	MCTS1	Cell death and survival	1
MERTK	Post translational modification	YER134C	1	13	1.14496	3.44134	0.468351	1.82958	ENSP00000288087	MDP1		1
MERTK	Post translational modification	YCL064C	1	22	1.93763	2.84839	0.35368	1.84097	ENSP00000341117	SDSL		1
MERTK	Post translational modification	YDR329C	1	19	1.67341	3.07125	0.387153	1.88221	ENSP00000356563	PEX3		1
MTTP	Lipid Metabolism	YBL067C	1	23	3.2647	2.86808	0.446047	1.58878	ENSP00000282344	USP12	Post translational modification	1
MTTP	Lipid Metabolism	YJR010W	1	63	8.94245	4.81569	0.170591	3.99417	ENSP00000361049	PAPSS2	Post translational modification	1
MTTP	Lipid Metabolism	YDR097C	1	16	2.2711	2.09216	0.582381	0.873727	ENSP00000234420	MSH6	Cell cycle	1
MTTP	Lipid Metabolism	YPL022W	1	16	2.2711	4.26541	0.321423	2.89441	ENSP00000310520	ERCC4	Cell cycle	1
MTTP	Lipid Metabolism	YBL068W	1	10	1.41944	2.24251	0.776513	0.501173	ENSP00000361512	PRPS1	Nucleic acid metabolism	1
MTTP	Lipid Metabolism	YMR120C	1	7	0.993606	2.16901	0.723291	0.600185	ENSP00000236959	ATIC	Nucleic acid metabolism	1
MTTP	Lipid Metabolism	YLR059C	1	17	2.41304	2.07537	0.543888	0.946601	ENSP00000265881	REXO2	Nucleic acid metabolism	1
MTTP	Lipid Metabolism	YOR347C	1	38	5.39386	4.06615	0.262378	2.99928	ENSP00000376214	PKLR	Nucleic acid metabolism	1
MTTP	Lipid Metabolism	YIL074C	1	75	10.6458	2.32348	0.419658	1.34842	ENSP00000358417	PHGDH	Amino Acid Metabolism	1
MTTP	Lipid Metabolism	YNL071W	1	13	1.84527	2.12167	0.627909	0.789455	ENSP00000280346	DLAT	Lipid Metabolism	1
MTTP	Lipid Metabolism	YOR180C	1	26	3.69054	3.2894	0.350114	2.13774	ENSP00000369461	ECI2	Lipid Metabolism	1
MTTP	Lipid Metabolism	YDR125C	0.361	47	6.67135	4.37851	0.19499	3.52474	ENSP00000013894	ABHD5	Lipid Metabolism	0.507
MTTP	Lipid Metabolism	YBR183W	0.402	32	4.5422	4.72344	0.199099	3.783	ENSP00000278544	ACER3	Lipid Metabolism	1
MTTP	Lipid Metabolism	YNL202W	1	75	10.6458	4.94381	0.137624	4.26342	ENSP00000219481	DECR2	Lipid Metabolism	1
MTTP	Lipid Metabolism	YJR073C	1	7	0.993606	1.97254	0.772269	0.449209	ENSP00000255389	PEMT	Protein Synthesis	1
MTTP	Lipid Metabolism	YLR058C	1	25	3.54859	2.1065	0.471514	1.11326	ENSP00000318868	SHMT1	Protein Synthesis	1
MTTP	Lipid Metabolism	YHR193C	1	10	1.41944	3.19954	0.461068	1.72434	ENSP00000377469	NACA	Protein Synthesis	1
MTTP	Lipid Metabolism	YDL182W	0.865	50	7.09718	3.63059	0.36203	2.31621	ENSP00000363614	HMGCL	Protein Synthesis	0.573
MTTP	Lipid Metabolism	YER074W	1	13	1.84527	3.82811	0.383689	2.35931	ENSP00000361435	RPS24	Protein Synthesis	1
MTTP	Lipid Metabolism	YBR233W	1	24	3.40665	4.09845	0.300199	2.8681	ENSP00000305556	PCBP1	Protein Synthesis	1
MTTP	Lipid Metabolism	YJL024C	1	6	0.851662	2.43349	0.67363	0.794218	ENSP00000325369	AP3S1	Molecular transport	1
MTTP	Lipid Metabolism	YOL002C	1	9	1.27749	2.126	0.607049	0.835412	ENSP00000349616	ADIPOR2	Molecular transport	1
MTTP	Lipid Metabolism	YOR222W	1	14	1.98721	1.97398	0.57087	0.847095	ENSP00000329452	SLC25A21	Molecular transport	1
MTTP	Lipid Metabolism	YBR220C	1	22	3.12276	1.98525	0.568717	0.856205	ENSP00000352456	SLC33A1	Molecular transport	1
MTTP	Lipid Metabolism	YEL063C	0.194	11	1.56138	2.32485	0.614047	0.897286	ENSP00000298085	SLC7A3	Molecular transport	0.275
MTTP	Lipid Metabolism	YMR221C	1	13	1.84527	2.42674	0.572402	1.03767	ENSP00000278426	SLC43A1	Molecular transport	1
MTTP	Lipid Metabolism	YBR104W	1	13	1.84527	3.02607	0.492513	1.53569	ENSP00000352167	SLC25A29	Molecular transport	1
MTTP	Lipid Metabolism	YNL259C	1	16	2.2711	2.96731	0.459495	1.60385	ENSP00000316854	ATOX1	Molecular transport	1
MTTP	Lipid Metabolism	YPL232W	0.672	12	1.70332	3.15896	0.446133	1.74965	ENSP00000215095	STX1B	Molecular transport	0.815
MTTP	Lipid Metabolism	YHR032W	0.121	12	1.70332	4.06187	0.41472	2.37733	ENSP00000326671	SLC47A2	Molecular transport	0.339
MTTP	Lipid Metabolism	YOR316C	0.387	50	7.09718	3.41312	0.243634	2.58157	ENSP00000355968	SLC30A1	Molecular transport	1
MTTP	Lipid Metabolism	YEL054C	1	3	0.425831	2.08979	0.964608	0.0739625	ENSP00000354739	RPL12		1
MTTP	Lipid Metabolism	YPL249C	1	9	1.27749	2.08389	0.885513	0.238578	ENSP00000359356	EVI5		1
MTTP	Lipid Metabolism	YOR269W	1	3	0.425831	2.64199	0.904445	0.252456	ENSP00000006951			1
MTTP	Lipid Metabolism	YDR336W	1	3	0.425831	2.93993	0.870901	0.379541	ENSP00000303802	GTPBP8		1
MTTP	Lipid Metabolism	YPL104W	1	3	0.425831	2.39758	0.82407	0.421807	ENSP00000355086	DARS2		1
MTTP	Lipid Metabolism	YPL013C	1	9	1.27749	2.10628	0.743446	0.540374	ENSP00000362036	MRPS16		1
MTTP	Lipid Metabolism	YDR289C	1	3	0.425831	3.2285	0.828824	0.552641	ENSP00000362532	RPRD1B		1
MTTP	Lipid Metabolism	YOR201C	1	5	0.709718	2.61022	0.786184	0.558108	ENSP00000250156	MRM1		1
MTTP	Lipid Metabolism	YHR113W	1	5	0.709718	2.44503	0.757785	0.592224	ENSP00000273075	DNPEP		1
MTTP	Lipid Metabolism	YLR083C	1	10	1.41944	2.19036	0.727063	0.59783	ENSP00000381104	TM9SF4		1
MTTP	Lipid Metabolism	YAR003W	1	6	0.851662	2.2328	0.675649	0.724211	ENSP00000264515			1
MTTP	Lipid Metabolism	YBL047C	1	4	0.567775	2.53589	0.712264	0.729668	ENSP00000248070	EPS15L1		1
MTTP	Lipid Metabolism	YIL112W	1	8	1.13555	2.26767	0.668581	0.751547	ENSP00000262457	INVS		1
MTTP	Lipid Metabolism	YDR001C	0.73	20	2.83887	2.11304	0.6184	0.806336	ENSP00000264029	TREH		1
MTTP	Lipid Metabolism	YEL061C	1	4	0.567775	2.7651	0.684439	0.872555	ENSP00000378533			1
MTTP	Lipid Metabolism	YNL129W	1	31	4.40025	2.03545	0.545855	0.924391	ENSP00000168977	NMRK2		1
MTTP	Lipid Metabolism	YHR114W	1	7	0.993606	2.49048	0.625209	0.933409	ENSP00000320117	TRIP10	Cell death and survival	1
MTTP	Lipid Metabolism	YML068W	1	16	2.2711	2.11672	0.520883	1.01416	ENSP00000348462	RFN14		1
MTTP	Lipid Metabolism	YOR065W	1	15	2.12916	2.15602	0.528064	1.0175	ENSP00000317159	CYC1		1
MTTP	Lipid Metabolism	YBL099W	1	6	0.851662	2.73193	0.623504	1.02856	ENSP00000282050	ATP5A1	Cell death and survival	1
MTTP	Lipid Metabolism	YBL091C	1	14	1.98721	2.22968	0.535164	1.03643	ENSP00000325312	METAP2	Cell death and survival	1
MTTP	Lipid Metabolism	YPR004C	1	13	1.84527	2.07337	0.494662	1.04775	ENSP00000267950	ETFA		1
MTTP	Lipid Metabolism	YMR104C	1	20	2.83887	2.48119	0.556601	1.10016	ENSP00000340608	SGK2		1
MTTP	Lipid Metabolism	YMR247C	1	22	3.12276	2.2293	0.494983	1.12583	ENSP00000373846	LTN1		1
MTTP	Lipid Metabolism	YHR204W	1	4	0.567775	3.44585	0.671928	1.13049	ENSP00000256497	EDEM1		1
MTTP	Lipid Metabolism	YHR123W	1	12	1.70332	2.39757	0.526718	1.13473	ENSP00000260585	EPT1		1
MTTP	Lipid Metabolism	YLR170C	1	10	1.41944	2.4957	0.525951	1.18308	ENSP00000369645	AP1S2		1
MTTP	Lipid Metabolism	YJR048W	1	11	1.56138	2.56896	0.53939	1.18329	ENSP00000307786	CYCS	Cell death and survival	1
MTTP	Lipid Metabolism	YPL167C	1	32	4.5422	2.26534	0.473101	1.19361	ENSP00000357795	REV3L	Cell death and survival	1
MTTP	Lipid Metabolism	YMR201C	1	10	1.41944	2.76966	0.559219	1.22081	ENSP00000364270	XPA	Cell death and survival	1
MTTP	Lipid Metabolism	YPL115C	1	10	1.41944	2.75897	0.546203	1.25201	ENSP00000303909	ABR		1
MTTP	Lipid Metabolism	YAL058W	1	12	1.70332	2.714	0.525688	1.28728	ENSP00000247461	CANX	Cell death and survival	1
MTTP	Lipid Metabolism	YMR020W	1	36	5.10997	2.31812	0.436096	1.3072	ENSP00000367309	MAOB	Cell death and survival	1
MTTP	Lipid Metabolism	YOR321W	0.525	23	3.2647	2.57269	0.489291	1.3139	ENSP00000261534	POMT2		1
MTTP	Lipid Metabolism	YOR033C	1	8	1.13555	2.99469	0.552916	1.33888	ENSP00000355506	EXO1	Cell death and survival	1
MTTP	Lipid Metabolism	YML059C	1	20	2.83887	2.5007	0.447846	1.38077	ENSP00000277531	PNPLA7		1
MTTP	Lipid Metabolism	YCL024W	0.088	8	1.13555	2.97497	0.534848	1.38381	ENSP00000233027	NEK4	Cell death and survival	0.07
MTTP	Lipid Metabolism	YPL041C	1	11	1.56138	2.88842	0.491025	1.47014	ENSP00000303279	IARS2		1
MTTP	Lipid Metabolism	YJR025C	1	11	1.56138	3.02424	0.496341	1.52319	ENSP00000294973	HAAO		1
MTTP	Lipid Metabolism	YLR209C	1	19	2.69693	2.67281	0.426551	1.53272	ENSP00000381136			1
MTTP	Lipid Metabolism	YAL042W	1	12	1.70332	3.03841	0.492909	1.54075	ENSP00000349970	ERGIC3		1
MTTP	Lipid Metabolism	YHR051W	1	8	1.13555	3.11717	0.493294	1.57949	ENSP00000317780	COX5A	Cell death and survival	1
MTTP	Lipid Metabolism	YHR171W	1	13	1.84527	3.09262	0.486737	1.58733	ENSP00000346437	ATG7	Cell death and survival	1
MTTP	Lipid Metabolism	YML118W	1	10	1.41944	3.1719	0.495589	1.59994	ENSP00000309142	PDE12		1
MTTP	Lipid Metabolism	YJL124C	1	8	1.13555	3.27334	0.500601	1.6347	ENSP00000310596	LSM1		1
MTTP	Lipid Metabolism	YDR020C	1	12	1.70332	3.17518	0.46039	1.71336	ENSP00000356853			1
MTTP	Lipid Metabolism	YOR341W	1	9	1.27749	3.17274	0.454455	1.73087	ENSP00000263857	POLR1A		1
MTTP	Lipid Metabolism	YDL070W	1	9	1.27749	3.32499	0.476714	1.73992	ENSP00000382253			1
MTTP	Lipid Metabolism	YIR002C	1	20	2.83887	3.11928	0.436079	1.75903	ENSP00000369213	DDX58	Cell death and survival	1
MTTP	Lipid Metabolism	YBR059C	1	12	1.70332	3.37255	0.469336	1.78969	ENSP00000386456	AAK1	Cell death and survival	1
MTTP	Lipid Metabolism	YNL292W	1	19	2.69693	3.18222	0.394597	1.92653	ENSP00000298746	TRUB1		1
MTTP	Lipid Metabolism	YDL135C	1	22	3.12276	3.21078	0.376632	2.0015	ENSP00000269321	ARHGDIA	Cell death and survival	1
MTTP	Lipid Metabolism	YDR036C	1	35	4.96803	3.13542	0.356736	2.0169	ENSP00000352706	HIBCH		1
MTTP	Lipid Metabolism	YER007W	1	8	1.13555	3.77636	0.462941	2.02813	ENSP00000384571	TBCE		1
MTTP	Lipid Metabolism	YDL174C	1	79	11.2136	2.73763	0.255524	2.0381	ENSP00000300051	LDHD		1
MTTP	Lipid Metabolism	YDR026C	1	44	6.24552	2.94141	0.299766	2.05968	ENSP00000333920	TTF1	Cell death and survival	1
MTTP	Lipid Metabolism	YNL183C	0.283	356	50.532	2.40891	0.144276	2.06136	ENSP00000332118	EPHB3	Cell death and survival	0.55
MTTP	Lipid Metabolism	YMR154C	1	73	10.3619	2.76015	0.250081	2.06989	ENSP00000253693	CAPN7		1
MTTP	Lipid Metabolism	YOR374W	1	11	1.56138	3.74846	0.425397	2.15387	ENSP00000366927	ALDH1B1		1
MTTP	Lipid Metabolism	YOR093C	1	18	2.55499	3.57433	0.382047	2.20877	ENSP00000301180	DIP2B		1
MTTP	Lipid Metabolism	YDL201W	1	31	4.40025	3.36598	0.339349	2.22373	ENSP00000386157			1
MTTP	Lipid Metabolism	YDR135C	1	27	3.83248	3.4127	0.330264	2.28561	ENSP00000382340	ABCC1	Cell death and survival	1
MTTP	Lipid Metabolism	YPL152W	1	29	4.11637	3.57608	0.35874	2.2932	ENSP00000385881			1
MTTP	Lipid Metabolism	YPL222W	1	18	2.55499	3.63452	0.357319	2.33584	ENSP00000370288	SELO		1
MTTP	Lipid Metabolism	YDR107C	0.665	59	8.37468	3.03919	0.204453	2.41782	ENSP00000381104	TM9SF4		1
MTTP	Lipid Metabolism	YML124C	0.627	8	1.13555	4.29361	0.433933	2.43047	ENSP00000248437	TUBA4A		1
MTTP	Lipid Metabolism	YMR012W	1	64	9.0844	3.38372	0.223332	2.62802	ENSP00000320468	CLUH		1
MTTP	Lipid Metabolism	YJR008W	1	24	3.40665	3.80503	0.307648	2.63442	ENSP00000368691	MEMO1		1
MTTP	Lipid Metabolism	YDR099W	1	23	3.2647	3.82789	0.29879	2.68415	ENSP00000264335	YWHAE	Cell death and survival	1
MTTP	Lipid Metabolism	YOR185C	0.869	12	1.70332	4.14878	0.349724	2.69785	ENSP00000376176	RAN	Cell death and survival	1
MTTP	Lipid Metabolism	YPL212C	1	17	2.41304	3.99503	0.321089	2.71227	ENSP00000365837	PUS1		1
MTTP	Lipid Metabolism	YPL198W	1	20	2.83887	4.02837	0.308459	2.78579	ENSP00000260536			0.89
MTTP	Lipid Metabolism	YOR040W	0.471	41	5.81969	3.85543	0.248239	2.89836	ENSP00000341952	HAGHL		0.139
MTTP	Lipid Metabolism	YNL083W	1	42	5.96163	3.83473	0.237343	2.92459	ENSP00000264128	SLC25A24	Cell death and survival	1
MTTP	Lipid Metabolism	YNL175C	1	15	2.12916	4.23985	0.303315	2.95383	ENSP00000352956	RBM23		1
MTTP	Lipid Metabolism	YOR347C	1	38	5.39386	4.06615	0.262378	2.99928	ENSP00000334983	PKM	Cell death and survival	1
MTTP	Lipid Metabolism	YNL273W	1	14	1.98721	4.50584	0.33353	3.00301	ENSP00000229201	TIMELESS		1
MTTP	Lipid Metabolism	YPL147W	1	31	4.40025	4.16804	0.276617	3.01509	ENSP00000310688	ABCD2	Cell death and survival	1
MTTP	Lipid Metabolism	YHL039W	1	43	6.10358	4.04952	0.253234	3.02405	ENSP00000327436	SETD3		1
MTTP	Lipid Metabolism	YJR014W	1	54	7.66496	4.03333	0.236785	3.0783	ENSP00000280557	DENR		1
MTTP	Lipid Metabolism	YNL219C	1	64	9.0844	3.96167	0.210742	3.12678	ENSP00000316397			1
MTTP	Lipid Metabolism	YEL011W	1	56	7.94885	4.38289	0.20016	3.50561	ENSP00000264326	GBE1	Cell death and survival	1
MTTP	Lipid Metabolism	YHR210C	1	22	3.12276	4.70198	0.247055	3.54033	ENSP00000272252	GALM		1
MTTP	Lipid Metabolism	YBR147W	0.465	63	8.94245	4.36784	0.18805	3.54647	ENSP00000364295	PQLC2		1
MTTP	Lipid Metabolism	YLR019W	1	631	89.5665	4.05193	0.108808	3.61105	ENSP00000260327	CTDSPL2		1
MTTP	Lipid Metabolism	YBL075C	0.222	37	5.25192	4.67038	0.223399	3.62702	ENSP00000227378			1
MTTP	Lipid Metabolism	YIL009W	0.773	88	12.491	4.43847	0.180198	3.63867	ENSP00000339787	ACSL4	Cell death and survival	1
MTTP	Lipid Metabolism	YDL189W	1	99	14.0524	4.40955	0.164501	3.68417	ENSP00000385169	R3HDM2		1
MTTP	Lipid Metabolism	YOR034C	0.234	67	9.51023	4.84533	0.148093	4.12777	ENSP00000322418			0.344
MTTP	Lipid Metabolism	YMR223W	1	76	10.7877	4.91555	0.140892	4.22299	ENSP00000261497	USP22	Cell death and survival	1
MTTP	Lipid Metabolism	YBR261C	1	83	11.7813	4.90076	0.130876	4.25937	ENSP00000361564	NTMT1		1
MTTP	Lipid Metabolism	YOR367W	1	56	7.94885	5.02743	0.148767	4.27951	ENSP00000357076	TAGLN2	Cell death and survival	1
MTTP	Lipid Metabolism	YMR152W	1	104	14.7621	4.87969	0.119411	4.297	ENSP00000358059	RTN4IP1		1
OPTN	Cell death and survival	YOR067C	1	29	1.38938	2.07355	0.447272	1.14611	ENSP00000299626	ALG8	Post translational modification	1
OPTN	Cell death and survival	YJR105W	1	5	0.239548	2.20053	0.832955	0.367589	ENSP00000286621	ADK	Nucleic acid metabolism	1
OPTN	Cell death and survival	YLR032W	1	24	1.14983	2.06529	0.401005	1.2371	ENSP00000376644	HLTF	Nucleic acid metabolism	1
OPTN	Cell death and survival	YEL038W	1	54	2.58712	2.14908	0.292813	1.5198	ENSP00000273920	ENOPH1	Amino Acid Metabolism	1
OPTN	Cell death and survival	YDR244W	1	36	1.72475	2.23782	0.344256	1.46744	ENSP00000379877	PEX5	Protein Synthesis	1
OPTN	Cell death and survival	YDL061C	0.8	15	0.718645	2.59477	0.405204	1.54336	ENSP00000379339	RPS29	Protein Synthesis	1
OPTN	Cell death and survival	YPL270W	0.084	17	0.814465	2.13666	0.420111	1.23902	ENSP00000355637	ABCB10	Molecular transport	1
OPTN	Cell death and survival	YHR161C	0.323	40	1.91639	2.30208	0.287388	1.64049	ENSP00000195649	SNAP91	Molecular transport	0.336
OPTN	Cell death and survival	YER053C	1	41	1.9643	3.29539	0.297262	2.3158	ENSP00000228318	SLC25A3	Molecular transport	1
OPTN	Cell death and survival	YDR266C	1	5	0.239548	2.09695	0.789288	0.441854	ENSP00000248125			1
OPTN	Cell death and survival	YMR143W	1	10	0.479097	2.10005	0.610062	0.818889	ENSP00000367806	RPS16		1
OPTN	Cell death and survival	YDR294C	1	17	0.814465	1.96461	0.573884	0.837153	ENSP00000299297	SGPL1	Cell death and survival	1
OPTN	Cell death and survival	YHR135C	0.49	15	0.718645	2.17554	0.602228	0.865369	ENSP00000378807	CSNK1G3		1
OPTN	Cell death and survival	YHR206W	1	13	0.622826	2.12461	0.515806	1.02873	ENSP00000313243	HSF5		1
OPTN	Cell death and survival	YMR304W	1	12	0.574916	2.17154	0.508981	1.06627	ENSP00000371310	USP7	Cell death and survival	1
OPTN	Cell death and survival	YIL126W	1	13	0.622826	2.11452	0.481359	1.09668	ENSP00000265773	SMARCA2	Cell death and survival	1
OPTN	Cell death and survival	YIL126W	1	13	0.622826	2.11452	0.481359	1.09668	ENSP00000350720	SMARCA4	Cell death and survival	1
OPTN	Cell death and survival	YOR101W	1	18	0.862374	2.16437	0.48711	1.11008	ENSP00000256196	RRAS2	Cell death and survival	1
OPTN	Cell death and survival	YDR105C	1	9	0.431187	2.40517	0.537685	1.11195	ENSP00000255175	SERINC3	Cell death and survival	1
OPTN	Cell death and survival	YOR234C	1	9	0.431187	2.472	0.541855	1.13254	ENSP00000330165			1
OPTN	Cell death and survival	YMR284W	1	49	2.34757	2.09873	0.397878	1.26369	ENSP00000353192	XRCC6		1
OPTN	Cell death and survival	YDR248C	1	32	1.53311	2.19239	0.422472	1.26617	ENSP00000365601	IDNK		1
OPTN	Cell death and survival	YPL009C	1	36	1.72475	1.98488	0.348215	1.29372	ENSP00000298310	NEMF		1
OPTN	Cell death and survival	YDR304C	1	31	1.4852	2.22495	0.386295	1.36546	ENSP00000300026	PPIB	Cell death and survival	1
OPTN	Cell death and survival	YIL044C	1	15	0.718645	2.42658	0.417204	1.4142	ENSP00000361803	SMAP2		1
OPTN	Cell death and survival	YJR129C	1	99	4.74306	1.97753	0.277078	1.4296	ENSP00000262365	FAM86B2		1
OPTN	Cell death and survival	YMR216C	1	17	0.814465	2.77437	0.461326	1.49448	ENSP00000337679			1
OPTN	Cell death and survival	YJL112W	1	121	5.79707	1.98425	0.237874	1.51225	ENSP00000379029	KIF21A		1
OPTN	Cell death and survival	YDR146C	1	50	2.39548	2.25788	0.330231	1.51226	ENSP00000369774	ZNF763		1
OPTN	Cell death and survival	YBL017C	1	13	0.622826	2.73106	0.445838	1.51345	ENSP00000256637	SORT1	Cell death and survival	1
OPTN	Cell death and survival	YDR063W	1	106	5.07843	2.15849	0.266775	1.58265	ENSP00000346789	GMFB	Cell death and survival	1
OPTN	Cell death and survival	YJL164C	0.413	28	1.34147	2.50886	0.36013	1.60534	ENSP00000359719	PRKACB		1
OPTN	Cell death and survival	YER028C	1	67	3.20995	2.23117	0.27862	1.60952	ENSP00000353863			1
OPTN	Cell death and survival	YJR024C	1	59	2.82667	2.40527	0.302932	1.67664	ENSP00000278359	APIP	Cell death and survival	1
OPTN	Cell death and survival	YMR130W	1	48	2.29966	2.34783	0.285418	1.67772	ENSP00000238379	HDHD3		1
OPTN	Cell death and survival	YDL131W	1	30	1.43729	2.62363	0.359374	1.68077	ENSP00000381654	HMGCLL1		1
OPTN	Cell death and survival	YBR053C	1	26	1.24565	2.57904	0.319201	1.7558	ENSP00000266079	PRPF6		1
OPTN	Cell death and survival	YPL225W	1	60	2.87458	2.39241	0.260192	1.76992	ENSP00000362456	PBDC1		1
OPTN	Cell death and survival	YOR231W	1	59	2.82667	2.39103	0.259683	1.77012	ENSP00000178640	MAP2K5	Cell death and survival	1
OPTN	Cell death and survival	YBR244W	1	186	8.9112	2.40389	0.248413	1.80673	ENSP00000346103	GPX4	Cell death and survival	1
OPTN	Cell death and survival	YHR073W	1	22	1.05401	2.82634	0.340577	1.86376	ENSP00000315410	OSBPL3		1
OPTN	Cell death and survival	YLR206W	1	38	1.82057	2.76984	0.314299	1.89928	ENSP00000378985			1
OPTN	Cell death and survival	YML076C	1	49	2.34757	2.7647	0.310318	1.90676	ENSP00000287936	HMGCR	Cell death and survival	1
OPTN	Cell death and survival	YMR132C	1	45	2.15594	2.77495	0.29072	1.96822	ENSP00000348933	CCDC25		1
OPTN	Cell death and survival	YDR093W	1	51	2.44339	2.66099	0.251712	1.99119	ENSP00000273859	ATP10D		1
OPTN	Cell death and survival	YDR284C	1	16	0.766555	3.12433	0.359959	1.99969	ENSP00000314854			1
OPTN	Cell death and survival	YOL008W	1	13	0.622826	3.54073	0.427704	2.02635	ENSP00000257927			1
OPTN	Cell death and survival	YMR210W	1	143	6.85108	2.61789	0.217509	2.04848	ENSP00000326491	ABHD1		1
OPTN	Cell death and survival	YER176W	1	42	2.01221	3.26308	0.226292	2.52467	ENSP00000360817	ZNFX1		1
OPTN	Cell death and survival	YOR005C	1	165	7.9051	3.23082	0.187636	2.6246	ENSP00000349393	LIG4		1
RAG2	Cell death and survival	YDL219W	1	61	2.98366	2.37514	0.330855	1.58932	ENSP00000366672	DTD1	Cell cycle	1
RAG2	Cell death and survival	YMR008C	1	73	3.57061	2.35688	0.274506	1.7099	ENSP00000346228	PLA2G4C	Lipid Metabolism	1
RAG2	Cell death and survival	YBR068C	0.141	51	2.49454	2.06603	0.492902	1.04768	ENSP00000298085	SLC7A3	Molecular transport	0.275
RAG2	Cell death and survival	YHR048W	0.07	10	0.489125	2.1727	0.510025	1.06457	ENSP00000357915	SLC22A16	Molecular transport	0.159
RAG2	Cell death and survival	YLL061W	0.126	56	2.7391	2.17459	0.313102	1.49372	ENSP00000298085	SLC7A3	Molecular transport	0.275
RAG2	Cell death and survival	YMR036C	1	12	0.58695	2.10614	0.611926	0.817338	ENSP00000321656	CDC25C	Cell death and survival	1
RAG2	Cell death and survival	YOR127W	0.206	8	0.3913	2.3546	0.617695	0.900176	ENSP00000341489	SYDE1		0.175
RAG2	Cell death and survival	YOR369C	1	9	0.440213	2.41525	0.618781	0.920741	ENSP00000356881			1
RAG2	Cell death and survival	YIL079C	1	13	0.635863	2.07126	0.494869	1.04626	ENSP00000337839	ZCCHC7		1
RAG2	Cell death and survival	YIL047C	1	9	0.440213	2.62254	0.539857	1.20674	ENSP00000356562	XPR1	Cell death and survival	1
RAG2	Cell death and survival	YMR009W	1	34	1.66303	2.03798	0.405013	1.21257	ENSP00000333666	ADI1	Cell death and survival	1
RAG2	Cell death and survival	YJL197W	1	22	1.07608	2.08978	0.418549	1.21511	ENSP00000265560	USP4		1
RAG2	Cell death and survival	YHL013C	1	25	1.22281	2.27686	0.460212	1.22902	ENSP00000285420	OTUD6B		1
RAG2	Cell death and survival	YOR033C	1	19	0.929338	2.14739	0.413123	1.26025	ENSP00000355506	EXO1	Cell death and survival	1
RAG2	Cell death and survival	YOR243C	1	24	1.1739	2.11555	0.399894	1.26956	ENSP00000348722	PUS7		1
RAG2	Cell death and survival	YCL057W	1	13	0.635863	2.41127	0.471139	1.27523	ENSP00000304467	THOP1		1
RAG2	Cell death and survival	YMR028W	1	10	0.489125	2.8274	0.53143	1.32484	ENSP00000348784	IGBP1	Cell death and survival	1
RAG2	Cell death and survival	YBR103W	1	10	0.489125	2.68438	0.501651	1.33776	ENSP00000263964	TBL1XR1		1
RAG2	Cell death and survival	YOL058W	1	43	2.10324	2.07248	0.33486	1.37849	ENSP00000253004	ASS1	Cell death and survival	1
RAG2	Cell death and survival	YDL243C	0.804	138	6.74993	2.01475	0.289071	1.43235	ENSP00000373538			0.913
RAG2	Cell death and survival	YNL072W	1	51	2.49454	2.17053	0.339502	1.43363	ENSP00000221486	RNASEH2A		1
RAG2	Cell death and survival	YJL115W	1	12	0.58695	2.42729	0.401319	1.45318	ENSP00000263382	ASF1B		1
RAG2	Cell death and survival	YCL033C	1	34	1.66303	2.24169	0.339776	1.48001	ENSP00000277598			1
RAG2	Cell death and survival	YHL017W	0.472	64	3.1304	2.16141	0.291923	1.53044	ENSP00000374484	TMEM87A		0.348
RAG2	Cell death and survival	YNL125C	1	79	3.86409	2.24633	0.300339	1.57167	ENSP00000343022	SLC16A12		1
RAG2	Cell death and survival	YOL043C	0.196	27	1.32064	2.50724	0.35631	1.61388	ENSP00000219066	NTHL1		1
RAG2	Cell death and survival	YDR001C	0.73	61	2.98366	2.40918	0.329864	1.61448	ENSP00000264029	TREH		1
RAG2	Cell death and survival	YCL011C	1	23	1.12499	2.48477	0.329985	1.66483	ENSP00000385269	ELAVL1	Cell death and survival	1
RAG2	Cell death and survival	YDL142C	1	154	7.53253	2.19476	0.222274	1.70692	ENSP00000368140	CRLS1		1
RAG2	Cell death and survival	YMR183C	1	26	1.27173	2.57176	0.334602	1.71124	ENSP00000222812	STX1A	Cell death and survival	1
RAG2	Cell death and survival	YDR086C	1	20	0.978251	2.68023	0.339952	1.76908	ENSP00000378906	SEC61G	Cell death and survival	1
RAG2	Cell death and survival	YIL133C	1	23	1.12499	2.8043	0.357242	1.80249	ENSP00000270634			1
RAG2	Cell death and survival	YDL136W	1	102	4.98908	2.47693	0.245792	1.86812	ENSP00000259469	RPL35		1
RAG2	Cell death and survival	YBR245C	0.062	31	1.51629	2.8024	0.316285	1.91604	ENSP00000283131	SMARCA5	Cell death and survival	1
RAG2	Cell death and survival	YMR230W	0.96	25	1.22281	2.81304	0.316981	1.92136	ENSP00000217256			0.722
RAG2	Cell death and survival	YBL103C	1	31	1.51629	2.7361	0.29264	1.93541	ENSP00000338360			1
RAG2	Cell death and survival	YHL007C	1	38	1.85868	2.77059	0.267178	2.03035	ENSP00000314067	PAK2	Cell death and survival	1
RAG2	Cell death and survival	YER171W	1	50	2.44563	2.84632	0.24941	2.13642	ENSP00000375809	ERCC2	Cell death and survival	1
RAG2	Cell death and survival	YHR037W	1	52	2.54345	2.88414	0.248481	2.16749	ENSP00000364490	ALDG4A1		1
RAG2	Cell death and survival	YPL240C	1	42	2.05433	2.98185	0.263737	2.19542	ENSP00000325875	HSP90AB1	Cell death and survival	1
RAG2	Cell death and survival	YDR018C	0.259	121	5.91842	3.20675	0.212067	2.5267	ENSP00000291572	AGPAT3		0.581
RAG2	Cell death and survival	YDR148C	1	75	3.66844	3.16811	0.201155	2.53083	ENSP00000335304	DLST	Cell death and survival	1
RAG2	Cell death and survival	YDR120C	1	23	1.12499	3.6432	0.300817	2.54727	ENSP00000350352	TRMT1		1
SCNN1B	Molecular transport	YOR323C	1	9	0.896937	2.01499	0.602684	0.800589	ENSP00000360268	ALDH18A1	Post translational modification	1
SCNN1B	Molecular transport	YOR136W	1	7	0.697618	3.26054	0.518871	1.56874	ENSP00000299518	IDH3A	Nucleic acid metabolism	1
SCNN1B	Molecular transport	YBR024W	0.381	35	3.48809	2.04617	0.54065	0.939911	ENSP00000379046	SCO2	Protein Synthesis	0.108
SCNN1B	Molecular transport	YNL270C	0.185	13	1.29558	2.38033	0.50248	1.18426	ENSP00000298085	SLC7A3	Molecular transport	0.275
SCNN1B	Molecular transport	YPL086C	1	3	0.298979	2.75367	0.871226	0.354601	ENSP00000256398	ELP3		1
SCNN1B	Molecular transport	YDL101C	1	4	0.398639	2.31756	0.821956	0.412629	ENSP00000372023	CHEK2	Cell death and survival	1
SCNN1B	Molecular transport	YBL022C	1	7	0.697618	1.98154	0.704609	0.58533	ENSP00000353826	LONP1	Cell death and survival	1
SCNN1B	Molecular transport	YBR164C	1	5	0.498298	2.37802	0.713483	0.681342	ENSP00000261636	ARL1		1
SCNN1B	Molecular transport	YHL036W	0.06	7	0.697618	2.03525	0.663178	0.685517	ENSP00000280612	SLC7A11	Cell death and survival	0.32
SCNN1B	Molecular transport	YOL081W	0.408	5	0.498298	2.54513	0.703738	0.754025	ENSP00000351015	NF1	Cell death and survival	1
SCNN1B	Molecular transport	YIL064W	1	12	1.19592	2.0642	0.594568	0.836894	ENSP00000357830			1
SCNN1B	Molecular transport	YIL110W	1	21	2.09285	1.97393	0.547613	0.892979	ENSP00000307077	METTL18		1
SCNN1B	Molecular transport	YPL227C	1	9	0.896937	2.34204	0.605019	0.925062	ENSP00000239891	ALG5		1
SCNN1B	Molecular transport	YBL036C	1	16	1.59455	2.09734	0.558446	0.92609	ENSP00000333551	PROSC		1
SCNN1B	Molecular transport	YCL011C	1	10	0.996597	2.04088	0.537137	0.94465	ENSP00000385269	ELAVL1	Cell death and survival	1
SCNN1B	Molecular transport	YLL009C	1	12	1.19592	2.13737	0.550872	0.959953	ENSP00000261070	COX17		1
SCNN1B	Molecular transport	YHR057C	0.053	21	2.09285	2.0266	0.501876	1.0095	ENSP00000303057	PPIC		0.299
SCNN1B	Molecular transport	YDR263C	0.16	25	2.49149	2.01987	0.491616	1.02687	ENSP00000355506	EXO1	Cell death and survival	1
SCNN1B	Molecular transport	YHL022C	1	16	1.59455	2.37648	0.560197	1.04518	ENSP00000360304			1
SCNN1B	Molecular transport	YML070W	0.154	28	2.79047	2.19424	0.512294	1.07014	ENSP00000344562	CORO6		1
SCNN1B	Molecular transport	YMR127C	1	23	2.29217	2.24209	0.500519	1.11988	ENSP00000259021	KAT7	Cell death and survival	1
SCNN1B	Molecular transport	YNL141W	1	40	3.98639	1.98997	0.435891	1.12256	ENSP00000361965	ADA	Cell death and survival	1
SCNN1B	Molecular transport	YER028C	1	31	3.08945	2.04307	0.427323	1.17002	ENSP00000353863			1
SCNN1B	Molecular transport	YML118W	1	12	1.19592	2.39215	0.506638	1.1802	ENSP00000309142	PDE12		1
SCNN1B	Molecular transport	YBR235W	1	37	3.68741	2.3513	0.479937	1.22283	ENSP00000275730	SLC12A9		1
SCNN1B	Molecular transport	YAL048C	1	6	0.597958	3.04875	0.590769	1.24765	ENSP00000351132	RHOT1	Cell death and survival	1
SCNN1B	Molecular transport	YBR161W	0.6	13	1.29558	2.59685	0.509876	1.27278	ENSP00000384794	A4GALT	Cell death and survival	0.208
SCNN1B	Molecular transport	YPL119C	0.389	111	11.0622	2.06151	0.355066	1.32954	ENSP00000353284	DDX3Y		1
SCNN1B	Molecular transport	YJL132W	1	155	15.4472	2.09682	0.358965	1.34414	ENSP00000230036	GPLD1	Cell death and survival	1
SCNN1B	Molecular transport	YBL078C	1	20	1.99319	2.5922	0.47621	1.35777	ENSP00000266458	GABARAPL1		1
SCNN1B	Molecular transport	YMR171C	1	25	2.49149	2.48074	0.436502	1.39789	ENSP00000316589	RANBP10		1
SCNN1B	Molecular transport	YJL036W	1	30	2.98979	2.56665	0.374661	1.60503	ENSP00000363349	SLX30		1
SCNN1B	Molecular transport	YLL001W	1	15	1.4949	2.86816	0.428356	1.63957	ENSP00000370388	DNM1L	Cell death and survival	1
SCNN1B	Molecular transport	YER007C-A	1	48	4.78366	2.52697	0.329283	1.69488	ENSP00000360365	MCTS1	Cell death and survival	1
SCNN1B	Molecular transport	YNL288W	1	44	4.38503	2.83237	0.359209	1.81496	ENSP00000273064	RQCD1		1
SCNN1B	Molecular transport	YOR142W	1	42	4.18571	2.65797	0.238801	2.02325	ENSP00000377446	SLCLG1		1
SCNN1B	Molecular transport	YCL039W	1	68	6.77686	2.86971	0.288232	2.04257	ENSP00000295024	WDR26	Cell death and survival	1
SCNN1B	Molecular transport	YML018C	1	8	0.797277	3.77078	0.440197	2.11089	ENSP00000245680	SLC35F5		1
SNAI2	Cell death and survival	YOR002W	1	12	0.950051	2.55271	0.452617	1.39731	ENSP00000263440	ALG6	Post translational modification	1
SNAI2	Cell death and survival	YEL062W	1	32	2.53347	2.46247	0.329152	1.65194	ENSP00000232501	NPRL2	Post translational modification	1
SNAI2	Cell death and survival	YJL106W	1	42	3.32518	2.62849	0.336126	1.74499	ENSP00000263043	ICK	Post translational modification	1
SNAI2	Cell death and survival	YPL135W	0.358	25	1.97927	2.29534	0.361329	1.46596	ENSP00000310623	ISCU	Amino Acid Metabolism	1
SNAI2	Cell death and survival	YDR287W	1	8	0.633367	2.49769	0.558421	1.10293	ENSP00000256108	IMPA1	Lipid Metabolism	1
SNAI2	Cell death and survival	YJL138C	1	18	1.42508	1.96112	0.451716	1.07525	ENSP00000293831	EIF4A1	Protein Synthesis	1
SNAI2	Cell death and survival	YLL062C	1	48	3.8002	1.96019	0.403366	1.16951	ENSP00000274353	BHMT	Protein Synthesis	1
SNAI2	Cell death and survival	YBR003W	1	6	0.475025	3.11156	0.615675	1.19585	ENSP00000365388	PDSS1	Protein Synthesis	1
SNAI2	Cell death and survival	YDR117C	1	19	1.50425	2.04452	0.549365	0.921331	ENSP00000271764	EIF2D	Molecular transport	1
SNAI2	Cell death and survival	YOR100C	1	18	1.42508	2.30409	0.48544	1.18559	ENSP00000326305	SLC25A20	Molecular transport	1
SNAI2	Cell death and survival	YHR117W	0.416	16	1.26673	2.33861	0.478051	1.22064	ENSP00000284320	TOMM70A	Molecular transport	1
SNAI2	Cell death and survival	YDR046C	0.13	68	5.38362	2.20219	0.405455	1.3093	ENSP00000298085	SLC7A3	Molecular transport	0.275
SNAI2	Cell death and survival	YNL253W	1	35	2.77098	2.94138	0.321205	1.9966	ENSP00000265097	THOC3	Molecular transport	1
SNAI2	Cell death and survival	YHR113W	1	8	0.633367	2.00136	0.656042	0.688384	ENSP00000273075	DNPEP		1
SNAI2	Cell death and survival	YDL214C	1	8	0.633367	2.55962	0.635669	0.932549	ENSP00000350896	EPHB4	Cell death and survival	1
SNAI2	Cell death and survival	YPL037C	1	8	0.633367	2.61638	0.632547	0.961396	ENSP00000360658			1
SNAI2	Cell death and survival	YBL037W	1	11	0.87088	2.12327	0.54022	0.976238	ENSP00000327694	AP2A2	Cell death and survival	1
SNAI2	Cell death and survival	YAL049C	1	10	0.791709	2.26371	0.55044	1.01767	ENSP00000296658	CMBL		1
SNAI2	Cell death and survival	YDL072C	1	16	1.26673	1.98507	0.479106	1.03401	ENSP00000343458	BCAP31	Cell death and survival	1
SNAI2	Cell death and survival	YOR079C	1	23	1.82093	2.01182	0.480746	1.04464	ENSP00000031146			1
SNAI2	Cell death and survival	YER004W	1	17	1.34591	2.03111	0.47758	1.06109	ENSP00000344925			1
SNAI2	Cell death and survival	YPL196W	1	26	2.05844	2.16639	0.503346	1.07595	ENSP00000217320	TLDC2		1
SNAI2	Cell death and survival	YML026C	1	9	0.712538	2.32522	0.535723	1.07955	ENSP00000363762			1
SNAI2	Cell death and survival	YHR110W	0.095	20	1.58342	2.11314	0.487431	1.08313	ENSP00000383007			0.303
SNAI2	Cell death and survival	YBL047C	1	7	0.554196	2.44991	0.546068	1.11209	ENSP00000248070	EPS15L1		1
SNAI2	Cell death and survival	YIL001W	1	29	2.29596	2.02196	0.432988	1.14648	ENSP00000232744	ABTB1		1
SNAI2	Cell death and survival	YNL127W	1	25	1.97927	2.259	0.462539	1.21413	ENSP00000358810	STRIP1		1
SNAI2	Cell death and survival	YOR289W	1	36	2.85015	2.06715	0.405734	1.22844	ENSP00000262844	AMMECR1		1
SNAI2	Cell death and survival	YBL082C	1	32	2.53347	2.07029	0.405164	1.23148	ENSP00000380793	ALG3		1
SNAI2	Cell death and survival	YHR121W	1	40	3.16684	2.01966	0.387469	1.2371	ENSP00000293406	LSM12		1
SNAI2	Cell death and survival	YPL212C	1	19	1.50425	2.00925	0.378161	1.24943	ENSP00000365837	PUS1		1
SNAI2	Cell death and survival	YLR050C	1	27	2.13761	2.37918	0.448421	1.3123	ENSP00000226230	TMEM97		1
SNAI2	Cell death and survival	YML022W	1	21	1.66259	2.28055	0.406402	1.35373	ENSP00000367615	APRT	Cell death and survival	1
SNAI2	Cell death and survival	YJR070C	1	18	1.42508	2.35355	0.422002	1.36035	ENSP00000250937	DOHH		1
SNAI2	Cell death and survival	YER171W	1	27	2.13761	2.22132	0.378862	1.37975	ENSP00000375809	ERCC2	Cell death and survival	1
SNAI2	Cell death and survival	YJL177W	1	16	1.26673	2.56156	0.459363	1.38487	ENSP00000386061			1
SNAI2	Cell death and survival	YER163C	1	17	1.34591	2.51477	0.434877	1.42115	ENSP00000295304	CHAC2		1
SNAI2	Cell death and survival	YOR027W	1	47	3.72103	2.35096	0.389037	1.43635	ENSP00000351646	STIP1	Cell death and survival	1
SNAI2	Cell death and survival	YJR025C	1	18	1.42508	2.5914	0.414789	1.51651	ENSP00000294973	HAAO		1
SNAI2	Cell death and survival	YEL030W	0.47	17	1.34591	2.62096	0.420546	1.51873	ENSP00000297185	HSPA9	Cell death and survival	1
SNAI2	Cell death and survival	YML036W	1	73	5.77948	2.38008	0.348391	1.55088	ENSP00000386936	TPRKB		1
SNAI2	Cell death and survival	YLR179C	1	12	0.950051	2.97196	0.436137	1.67578	ENSP00000261313	PEBP1	Cell death and survival	1
SNAI2	Cell death and survival	YPL089C	1	10	0.791709	3.26616	0.48632	1.67776	ENSP00000284368			1
SNAI2	Cell death and survival	YJL100W	1	48	3.8002	2.49695	0.323364	1.68953	ENSP00000264864	PI4K2B		1
SNAI2	Cell death and survival	YPR004C	1	27	2.13761	2.65653	0.311104	1.83007	ENSP00000267950	ETFA		1
SNAI2	Cell death and survival	YML078W	0.079	85	6.72953	2.55814	0.261814	1.88838	ENSP00000348240			0.175
SNAI2	Cell death and survival	YBR223C	1	24	1.9001	3.00917	0.36658	1.90607	ENSP00000377099			1
SNAI2	Cell death and survival	YLL024C	0.903	31	2.4543	3.04708	0.283774	2.1824	ENSP00000227378			1

## Sheet: Legend
	Amino acid metabolism
	Cell cycle
	Cell death and survival
	Cell morphology
	Gene expression
	Lipid metabolism
	Molecular transport
	Nucleic acid metabolism
	Post translational modification
	Protein synthesis
	Tissue development
