# Supplementary material for: Yeast genetic interaction screen of human genes associated with amyotrophic lateral sclerosis: identification of MAP2K5 kinase as a potential drug target
Source: HighWire-hosted journal article supplement (doi:10.1101/gr.211649.116), 2017-06-08
Supplement: Supplemental_Fig_S1.pdf [file Supplemental_Fig_S1.pdf]

# Supplemental Figure 1

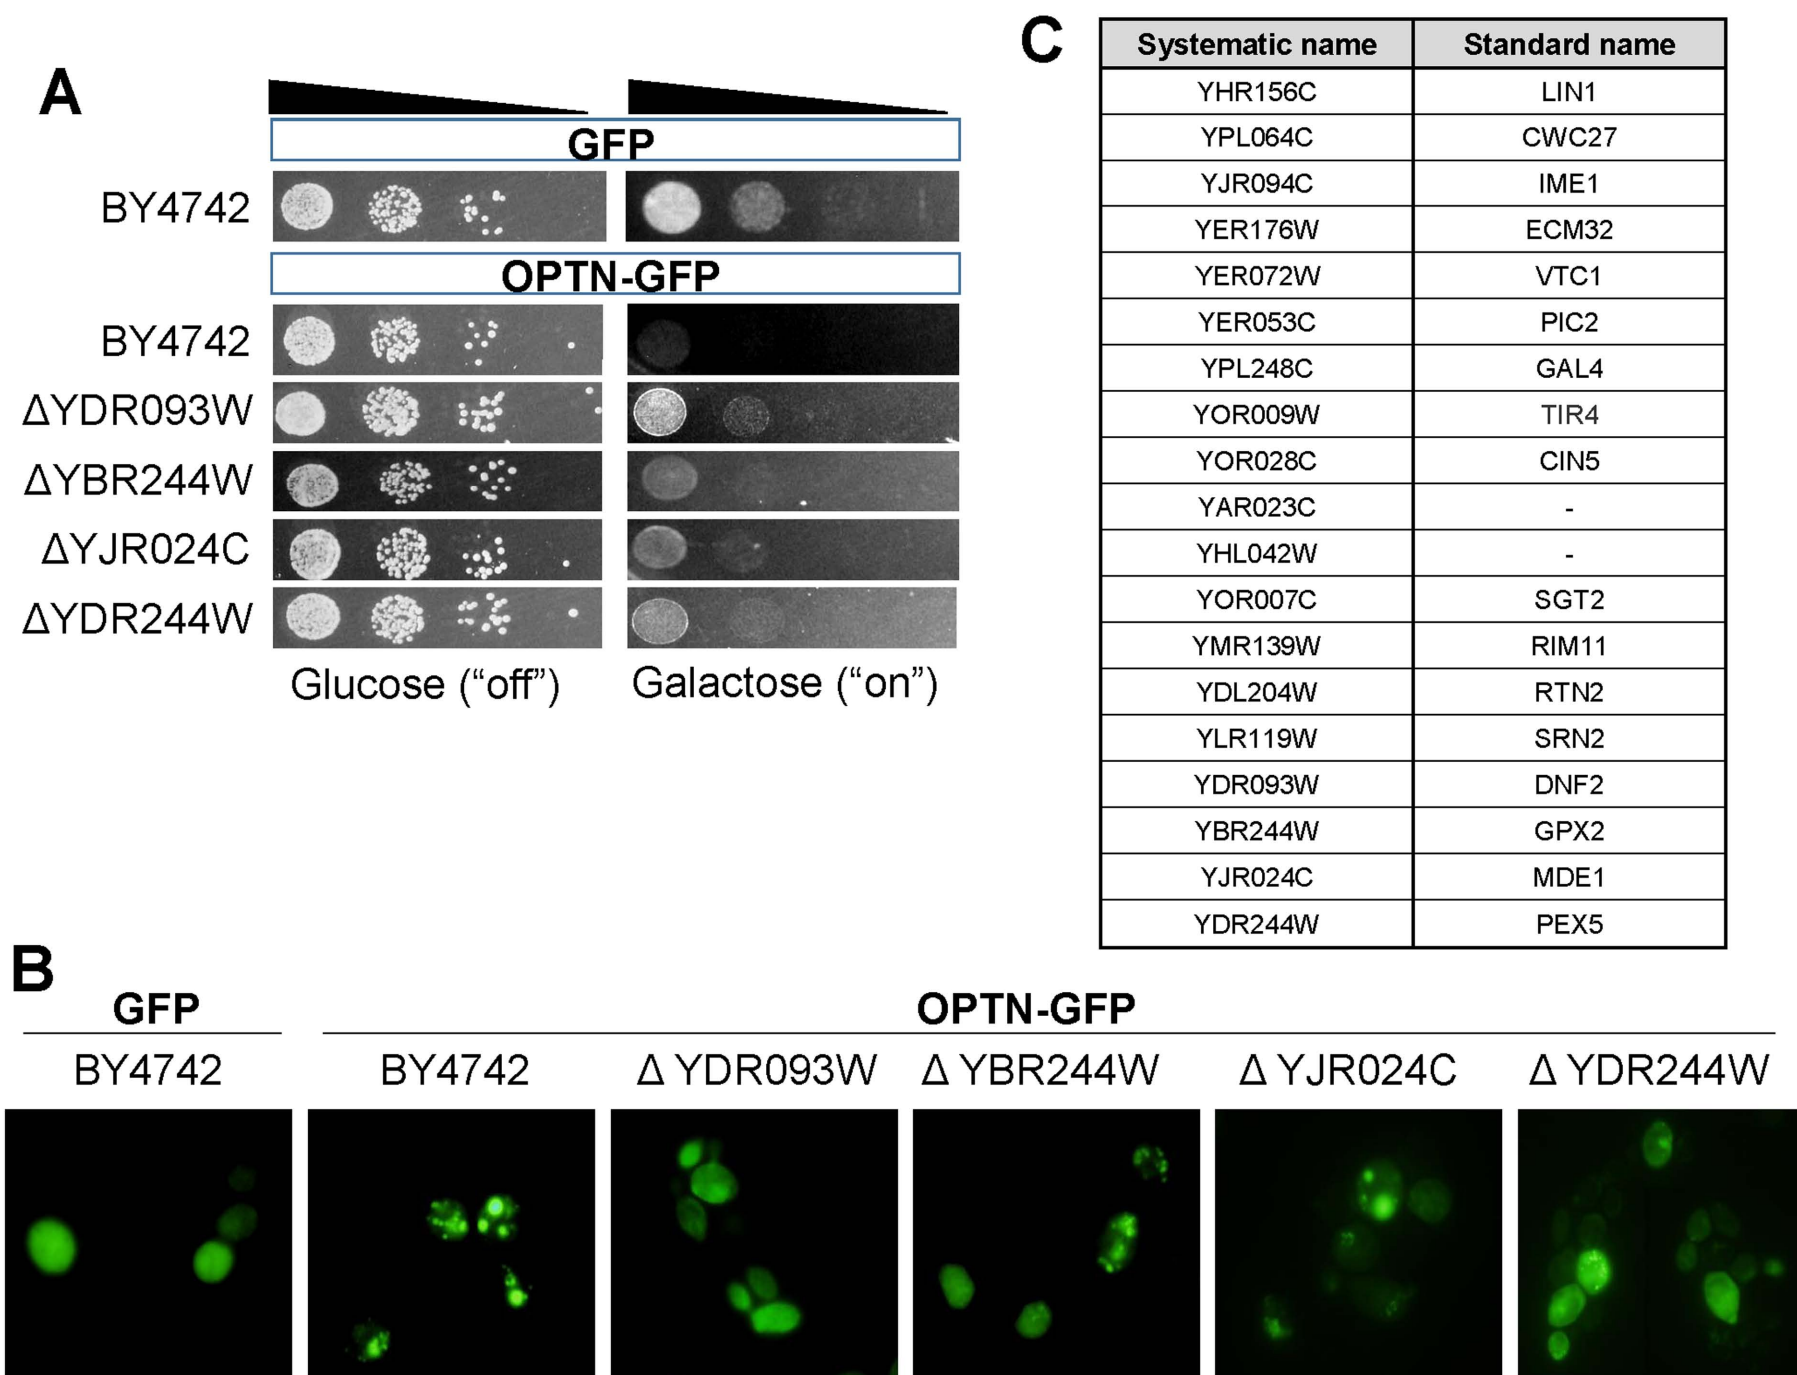

**Supplemental Figure 1. Evaluation of yeast toxicity and protein aggregate formation after expression of GFP-fused OPTN.** GFP-tagged OPTN induced yeast toxicity (A) and aggregate formation (B) in several yeast deletion strains in a manner similar to that of untagged OPTN protein. Systematic and standard names of the yeast deletion used here and Figure 3 are listed (C).
