# Supplementary material for: Yeast genetic interaction screen of human genes associated with amyotrophic lateral sclerosis: identification of MAP2K5 kinase as a potential drug target
Source: HighWire-hosted journal article supplement (doi:10.1101/gr.211649.116), 2017-06-08
Supplement: Supplemental_Fig_S2.pdf [file Supplemental_Fig_S2.pdf]

Supplemental Figure 2A

A

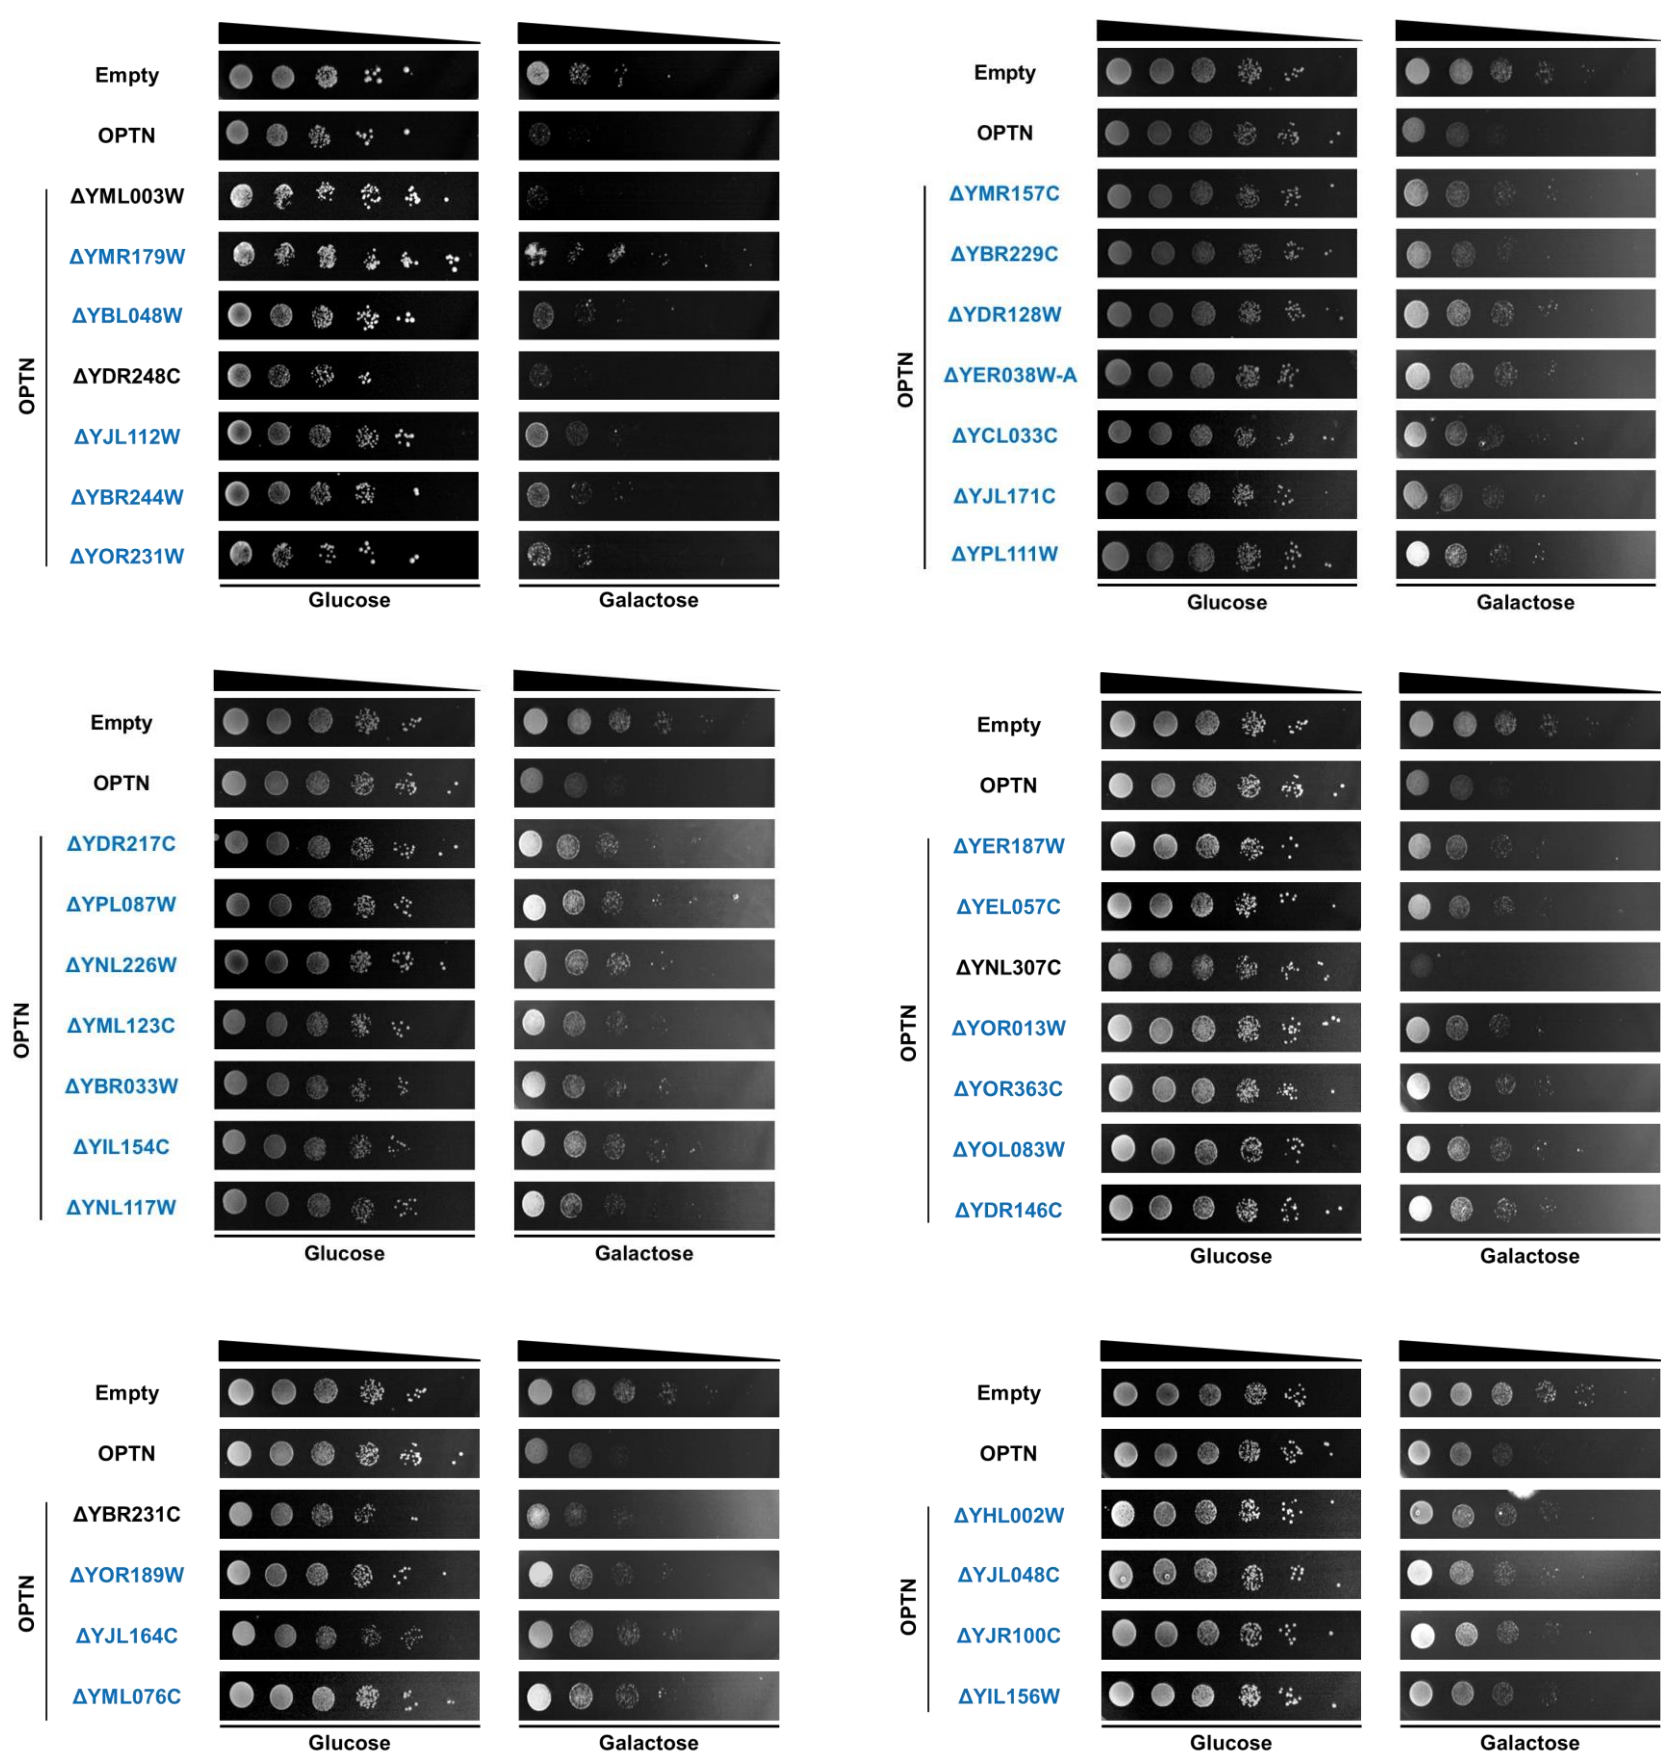

**Supplemental Figure 2. Validation of toxicity modifiers by yeast spot assays.** Ten percent of randomly selected modifying genes from toxicity suppressors and enhancers for the three OMIM genes (OPTN, ANG, and CLINT1) were tested by yeast spot assays. A, suppressors for OPTN; B, enhancers for OPTN; C, suppressors for ANG; D, enhancers for ANG; E, suppressors for CLINT1; F, enhancers for CLINT1; G, summary table. Deletion strains in blue indicate consistent results.

Supplemental Figure 2A continued

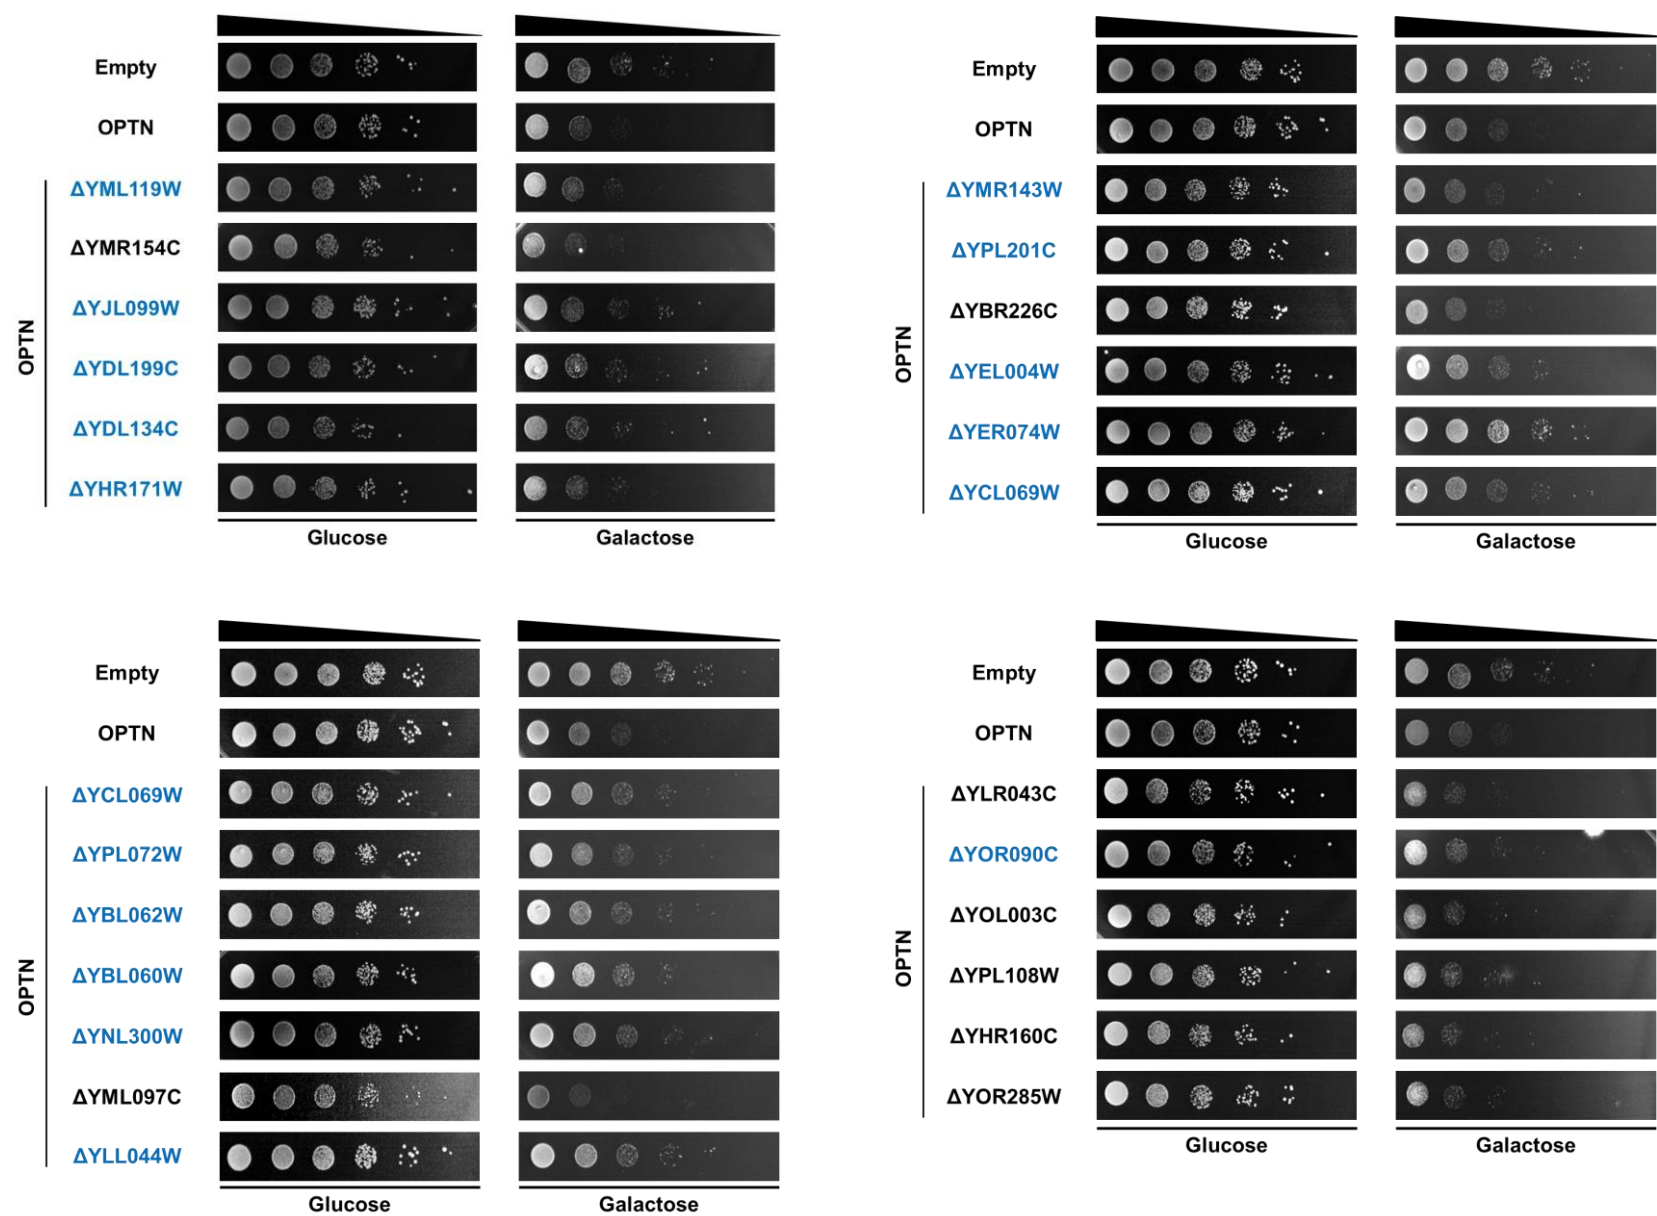

Supplemental Figure 2B

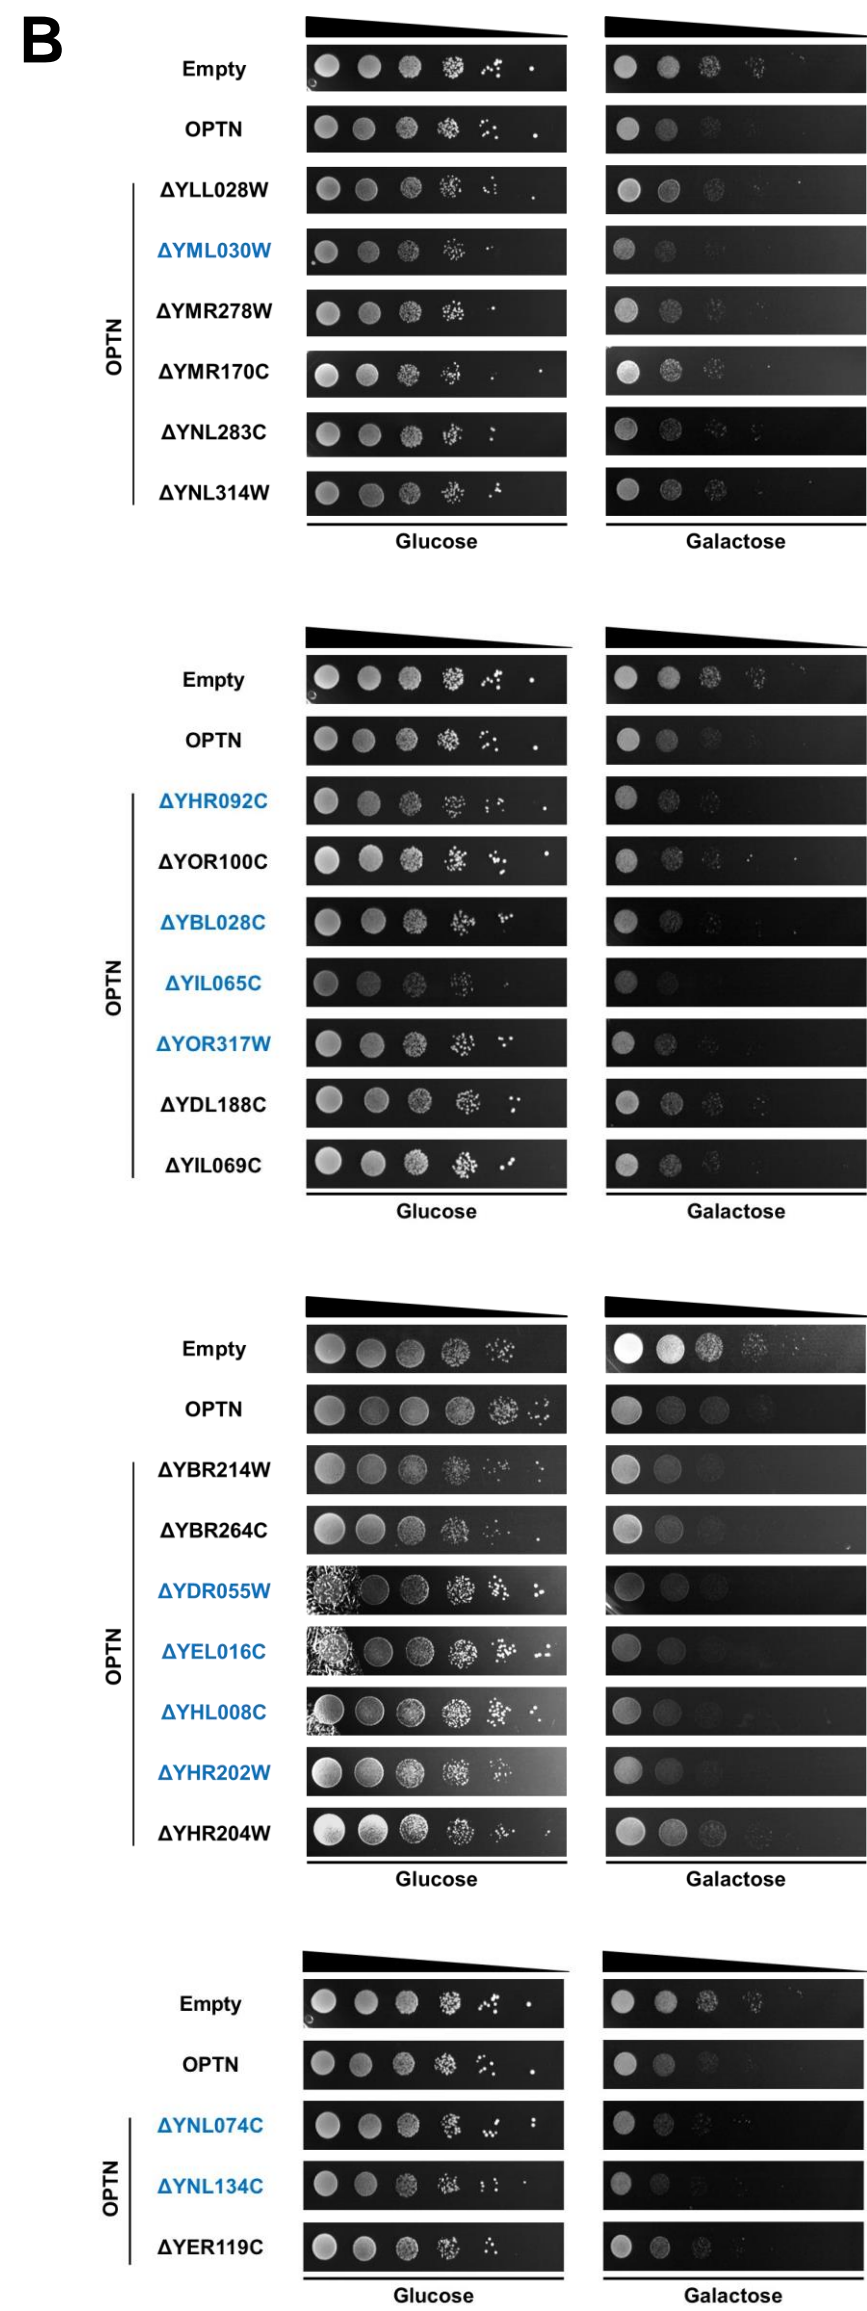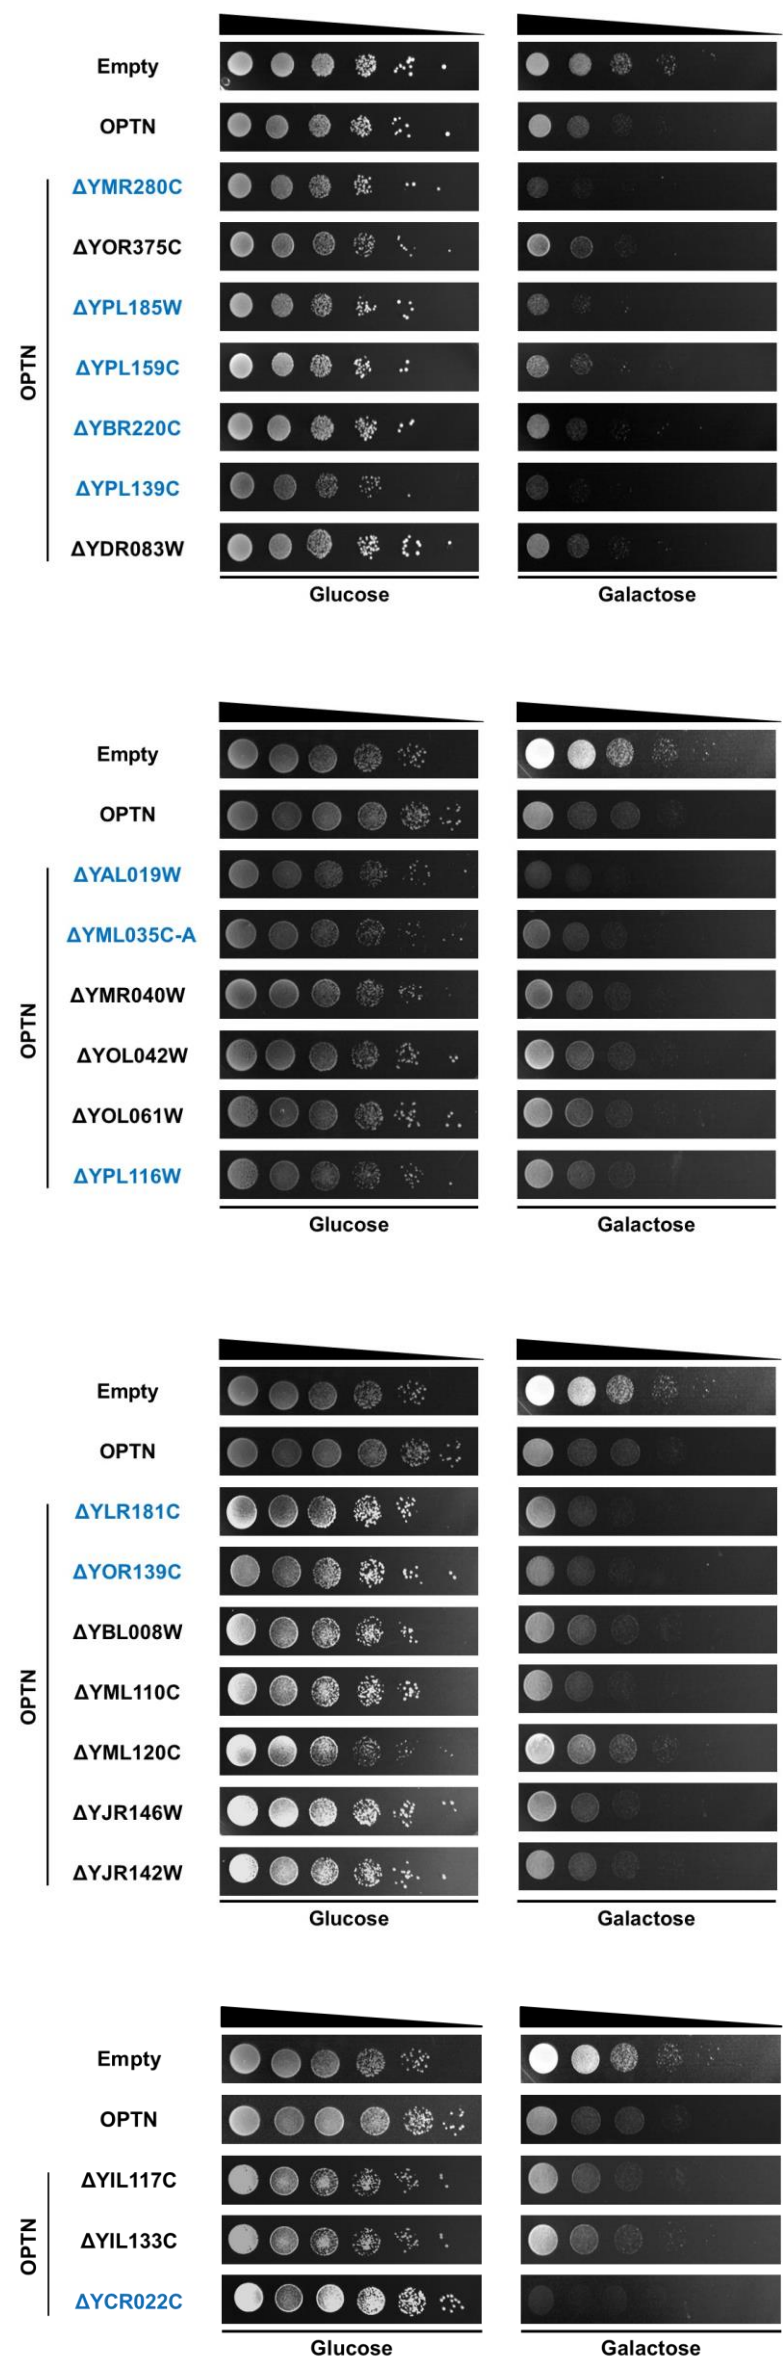



Supplemental Figure 2B continued

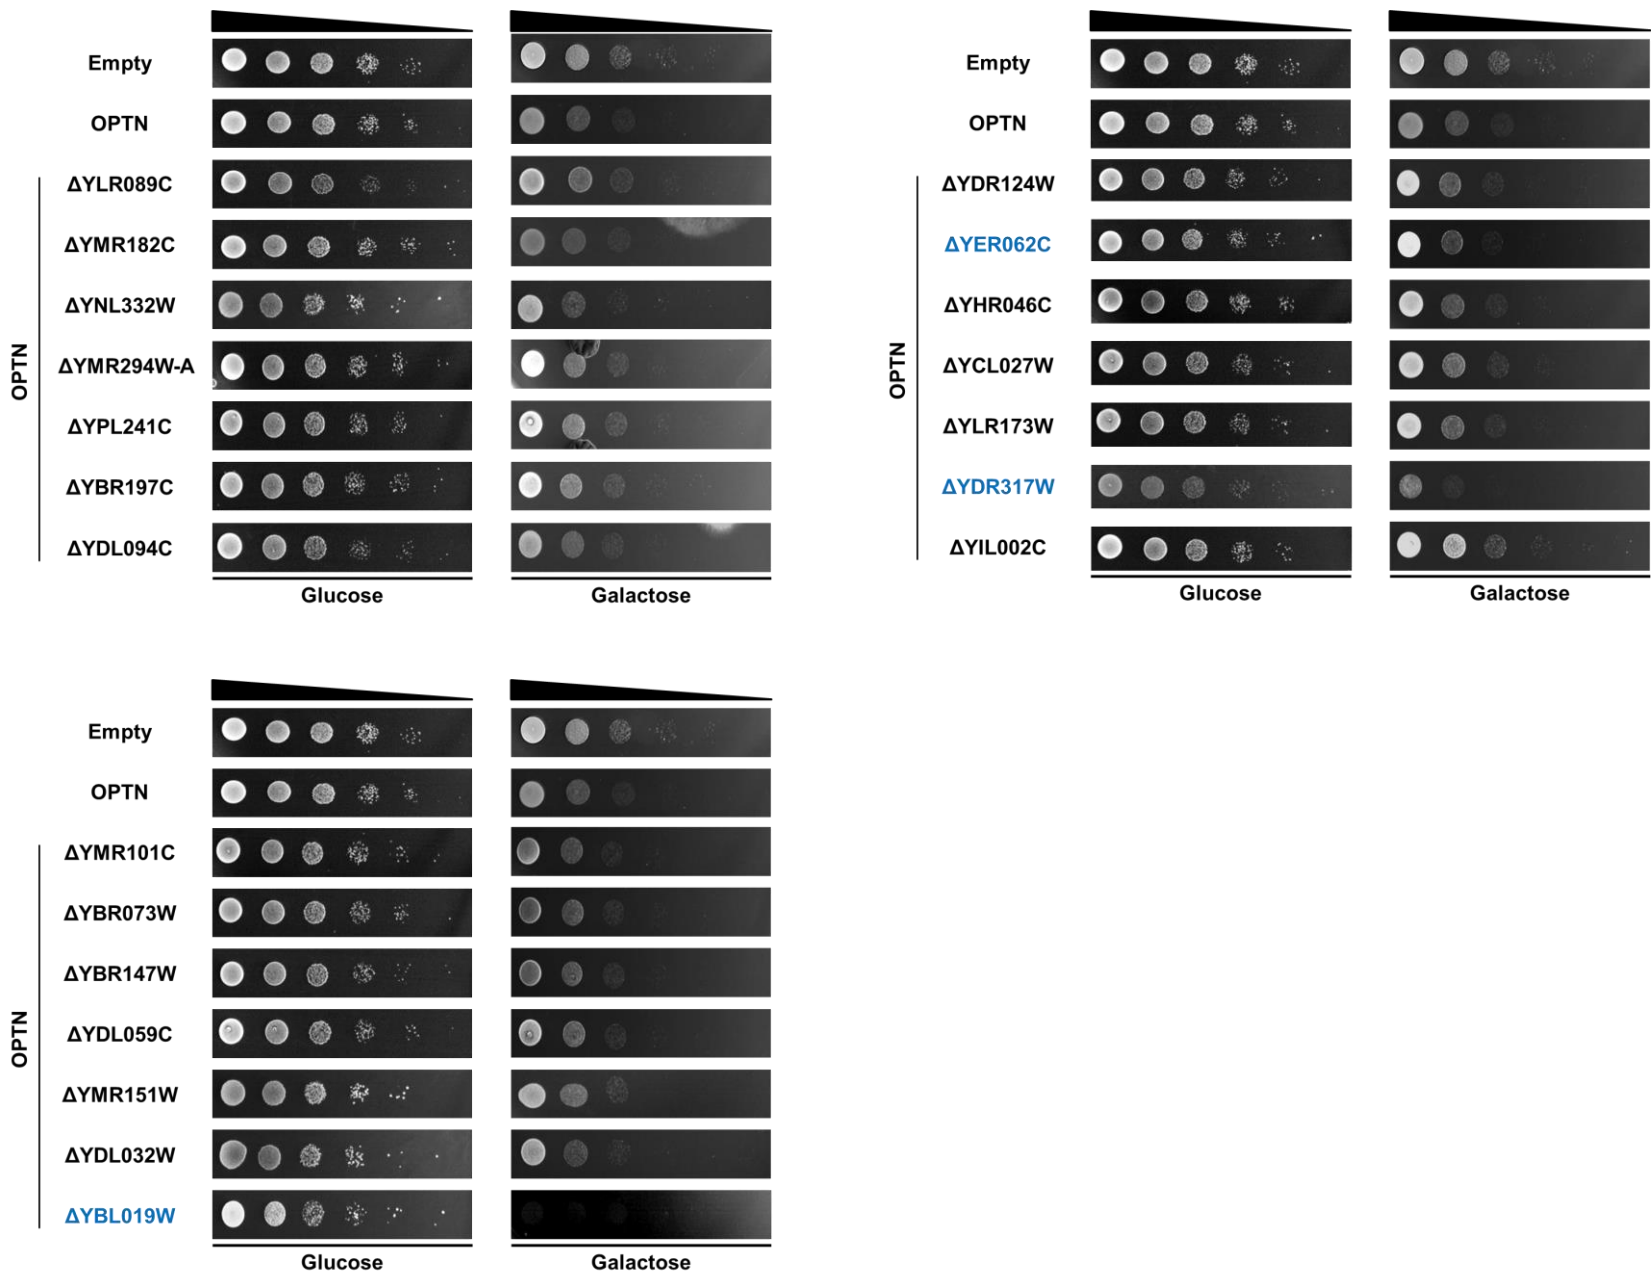

Supplemental Figure 2C

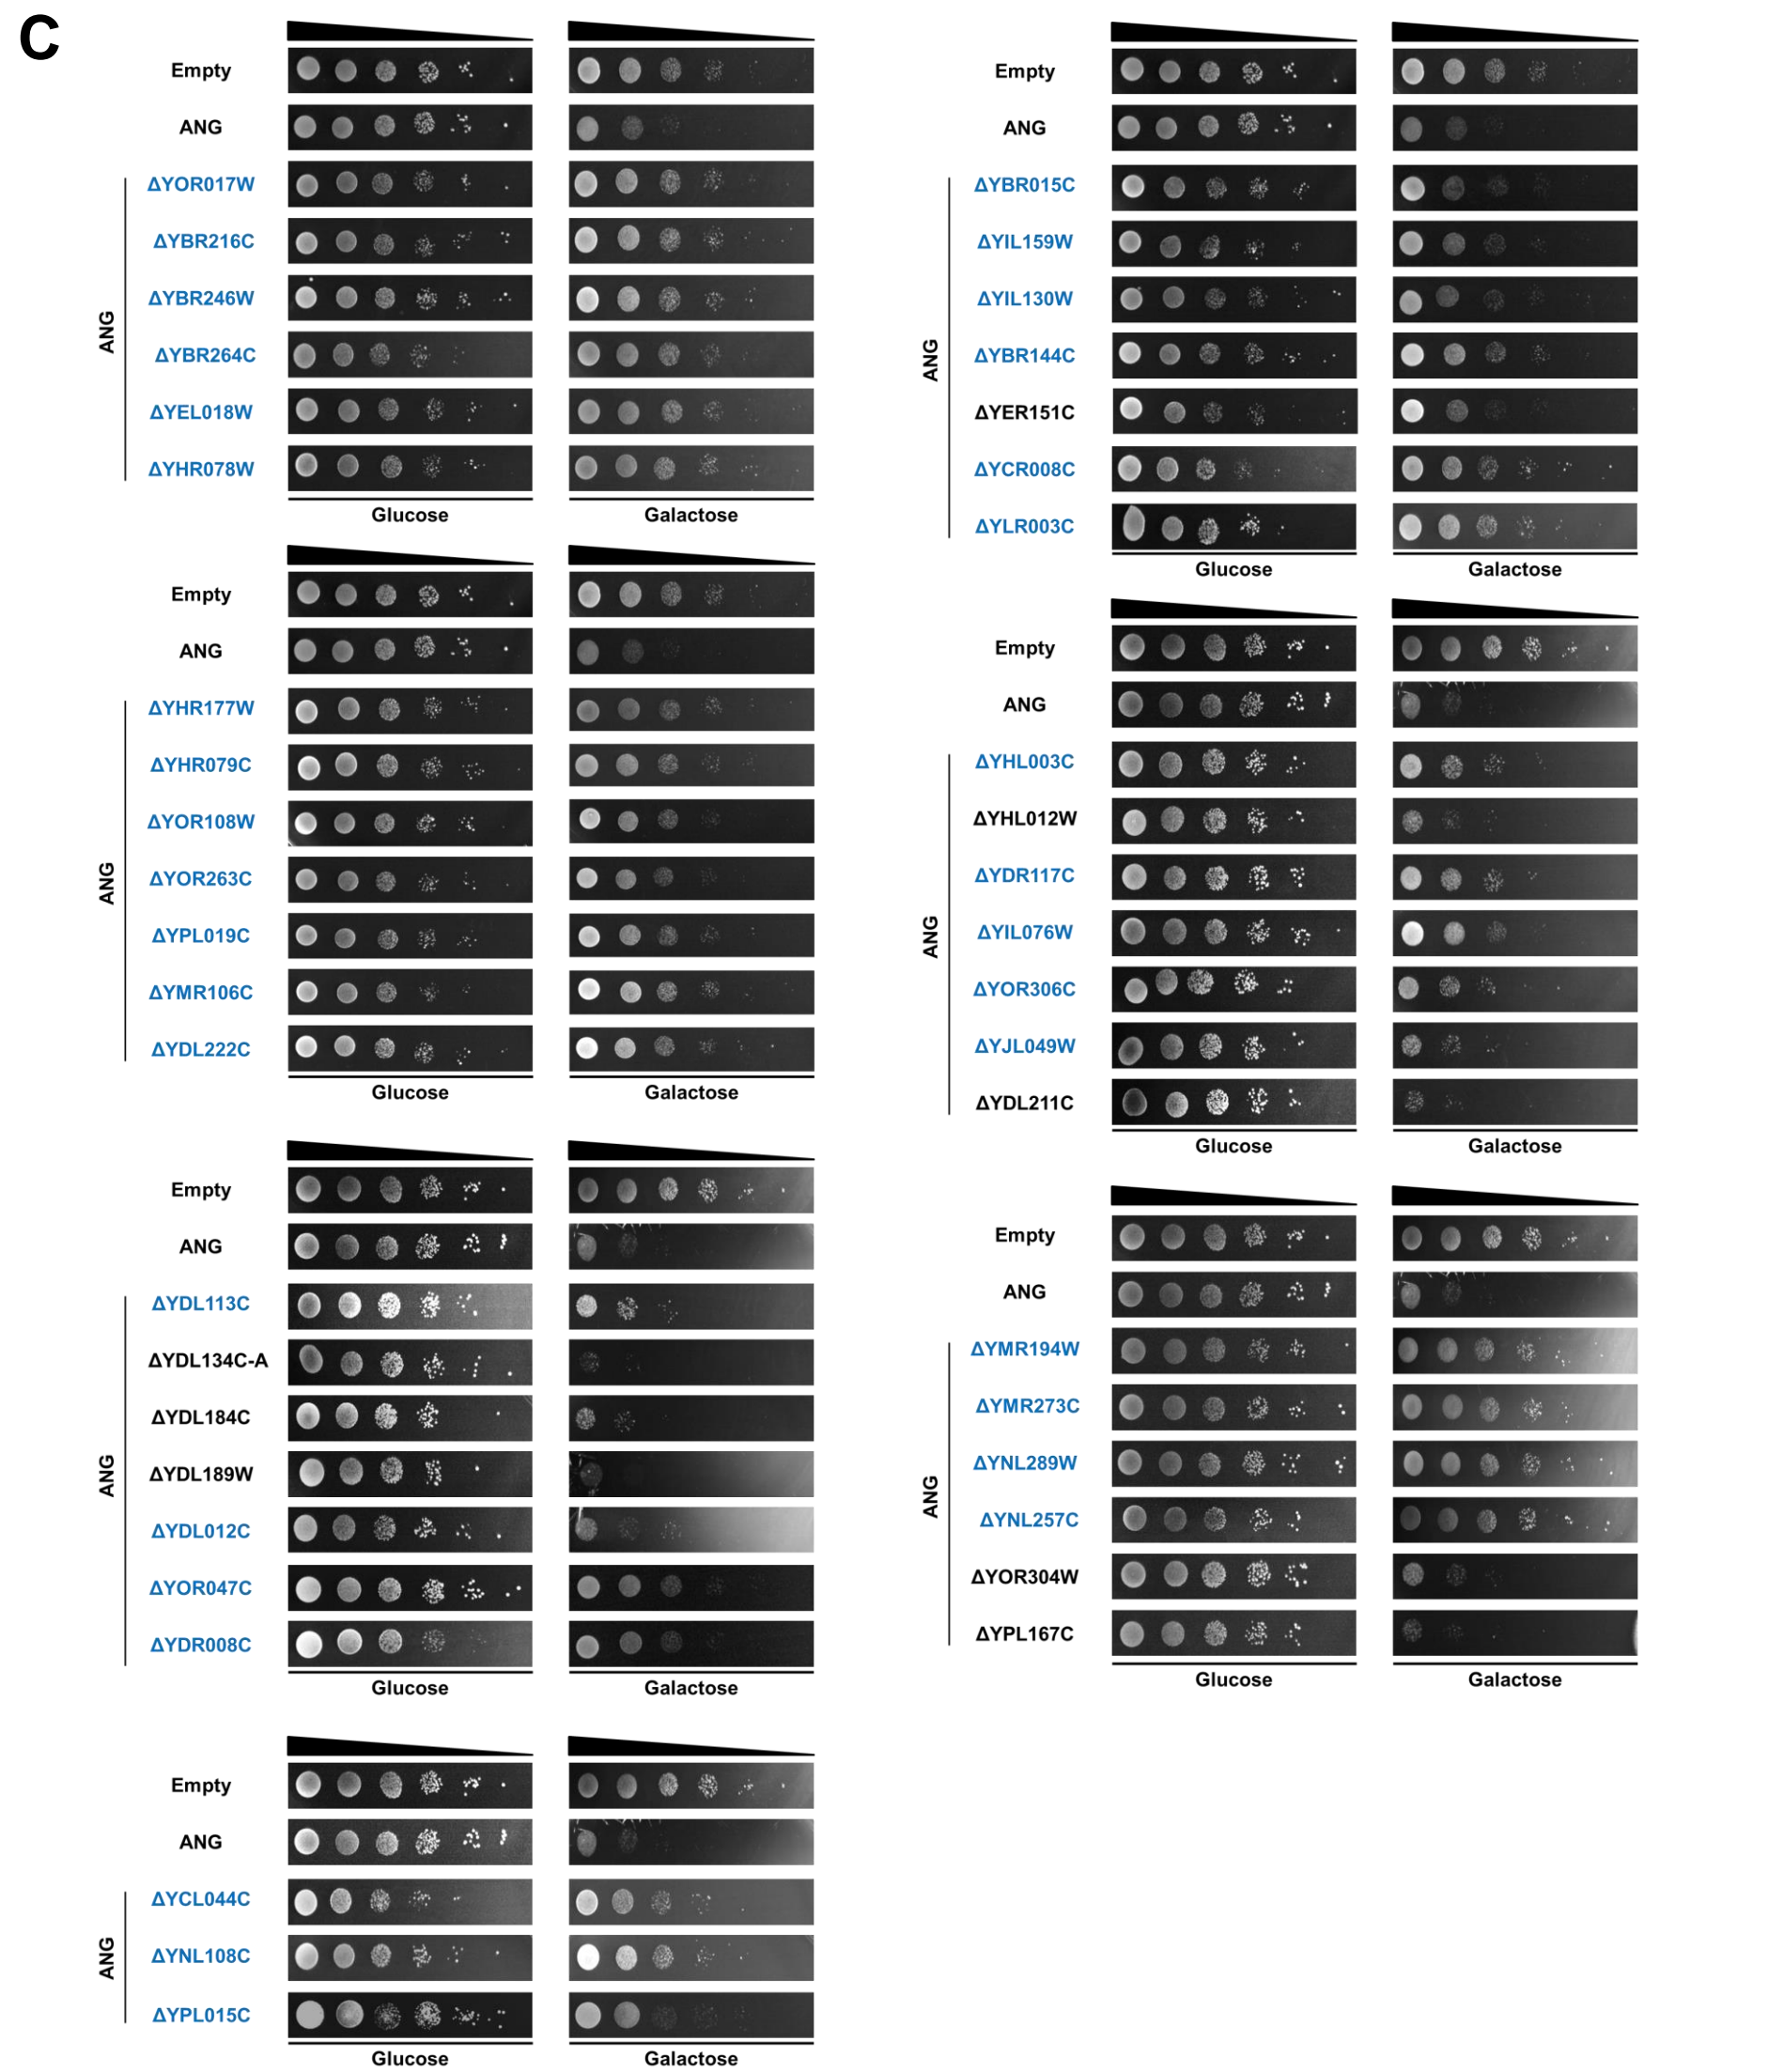

Supplemental Figure 2D

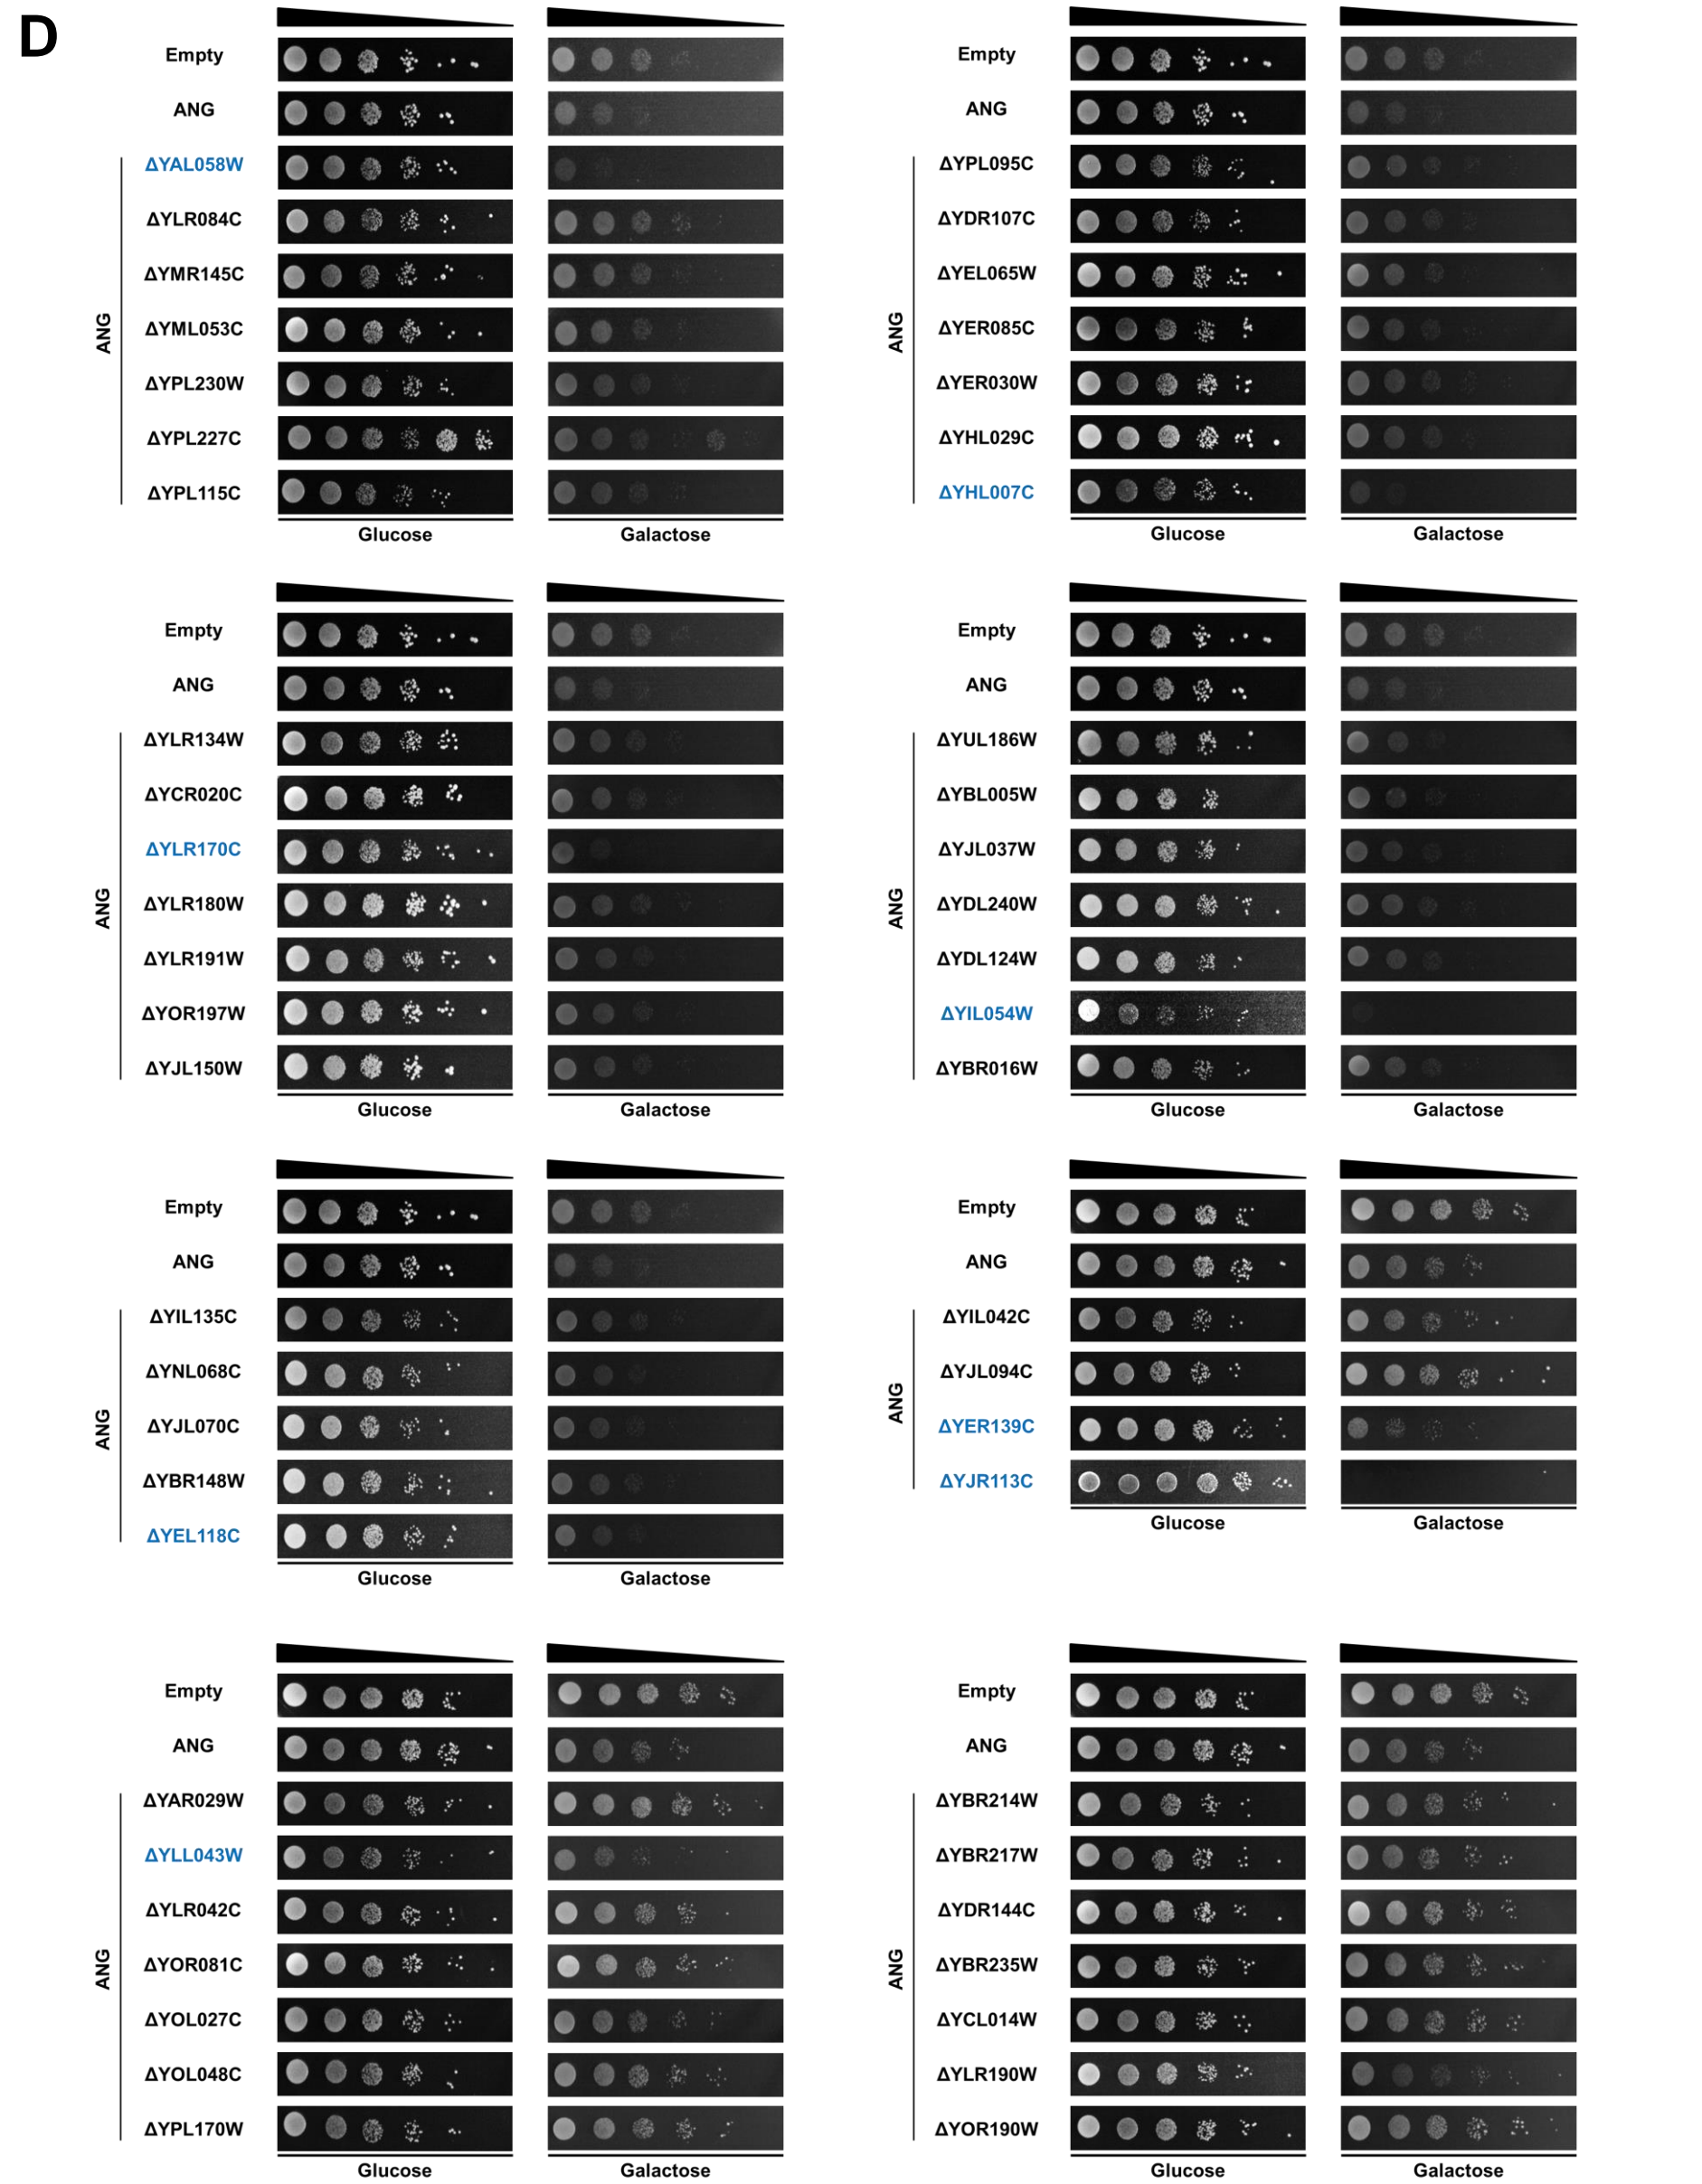

Supplemental Figure 2D continued

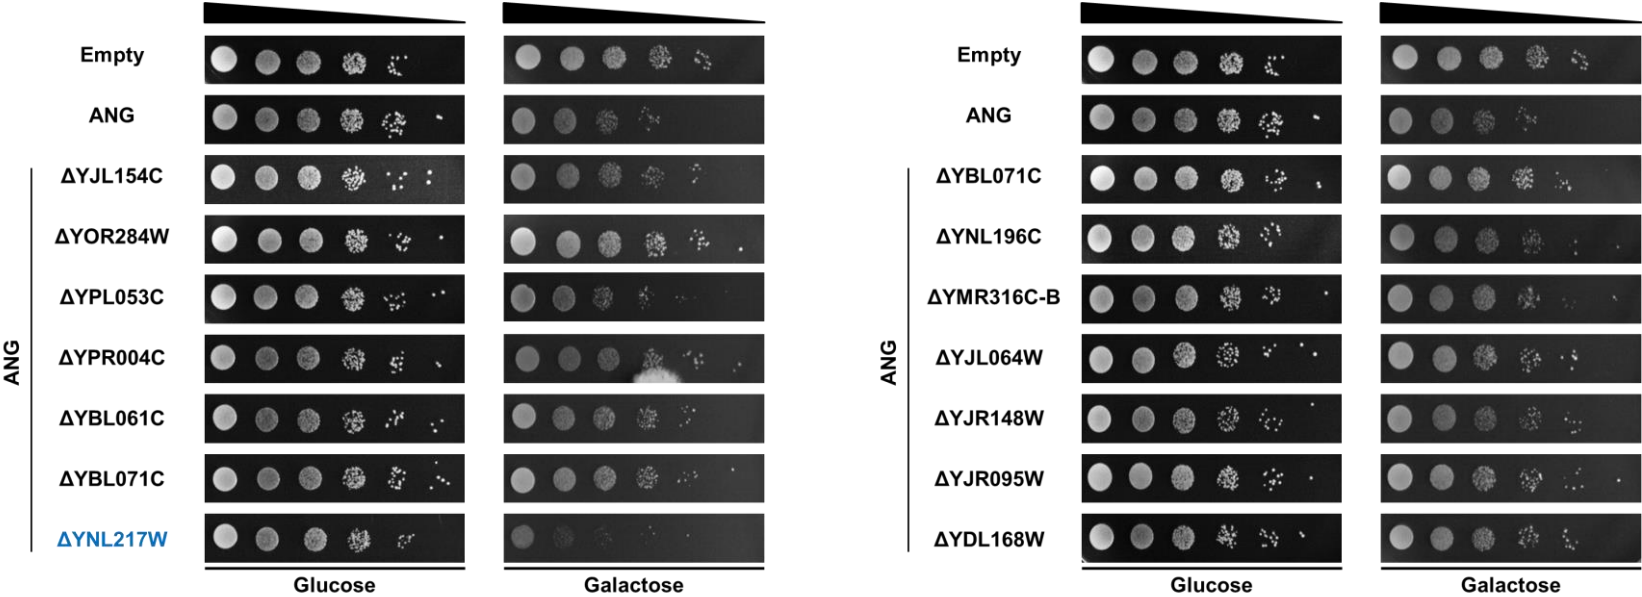



Supplemental Figure 2E

E

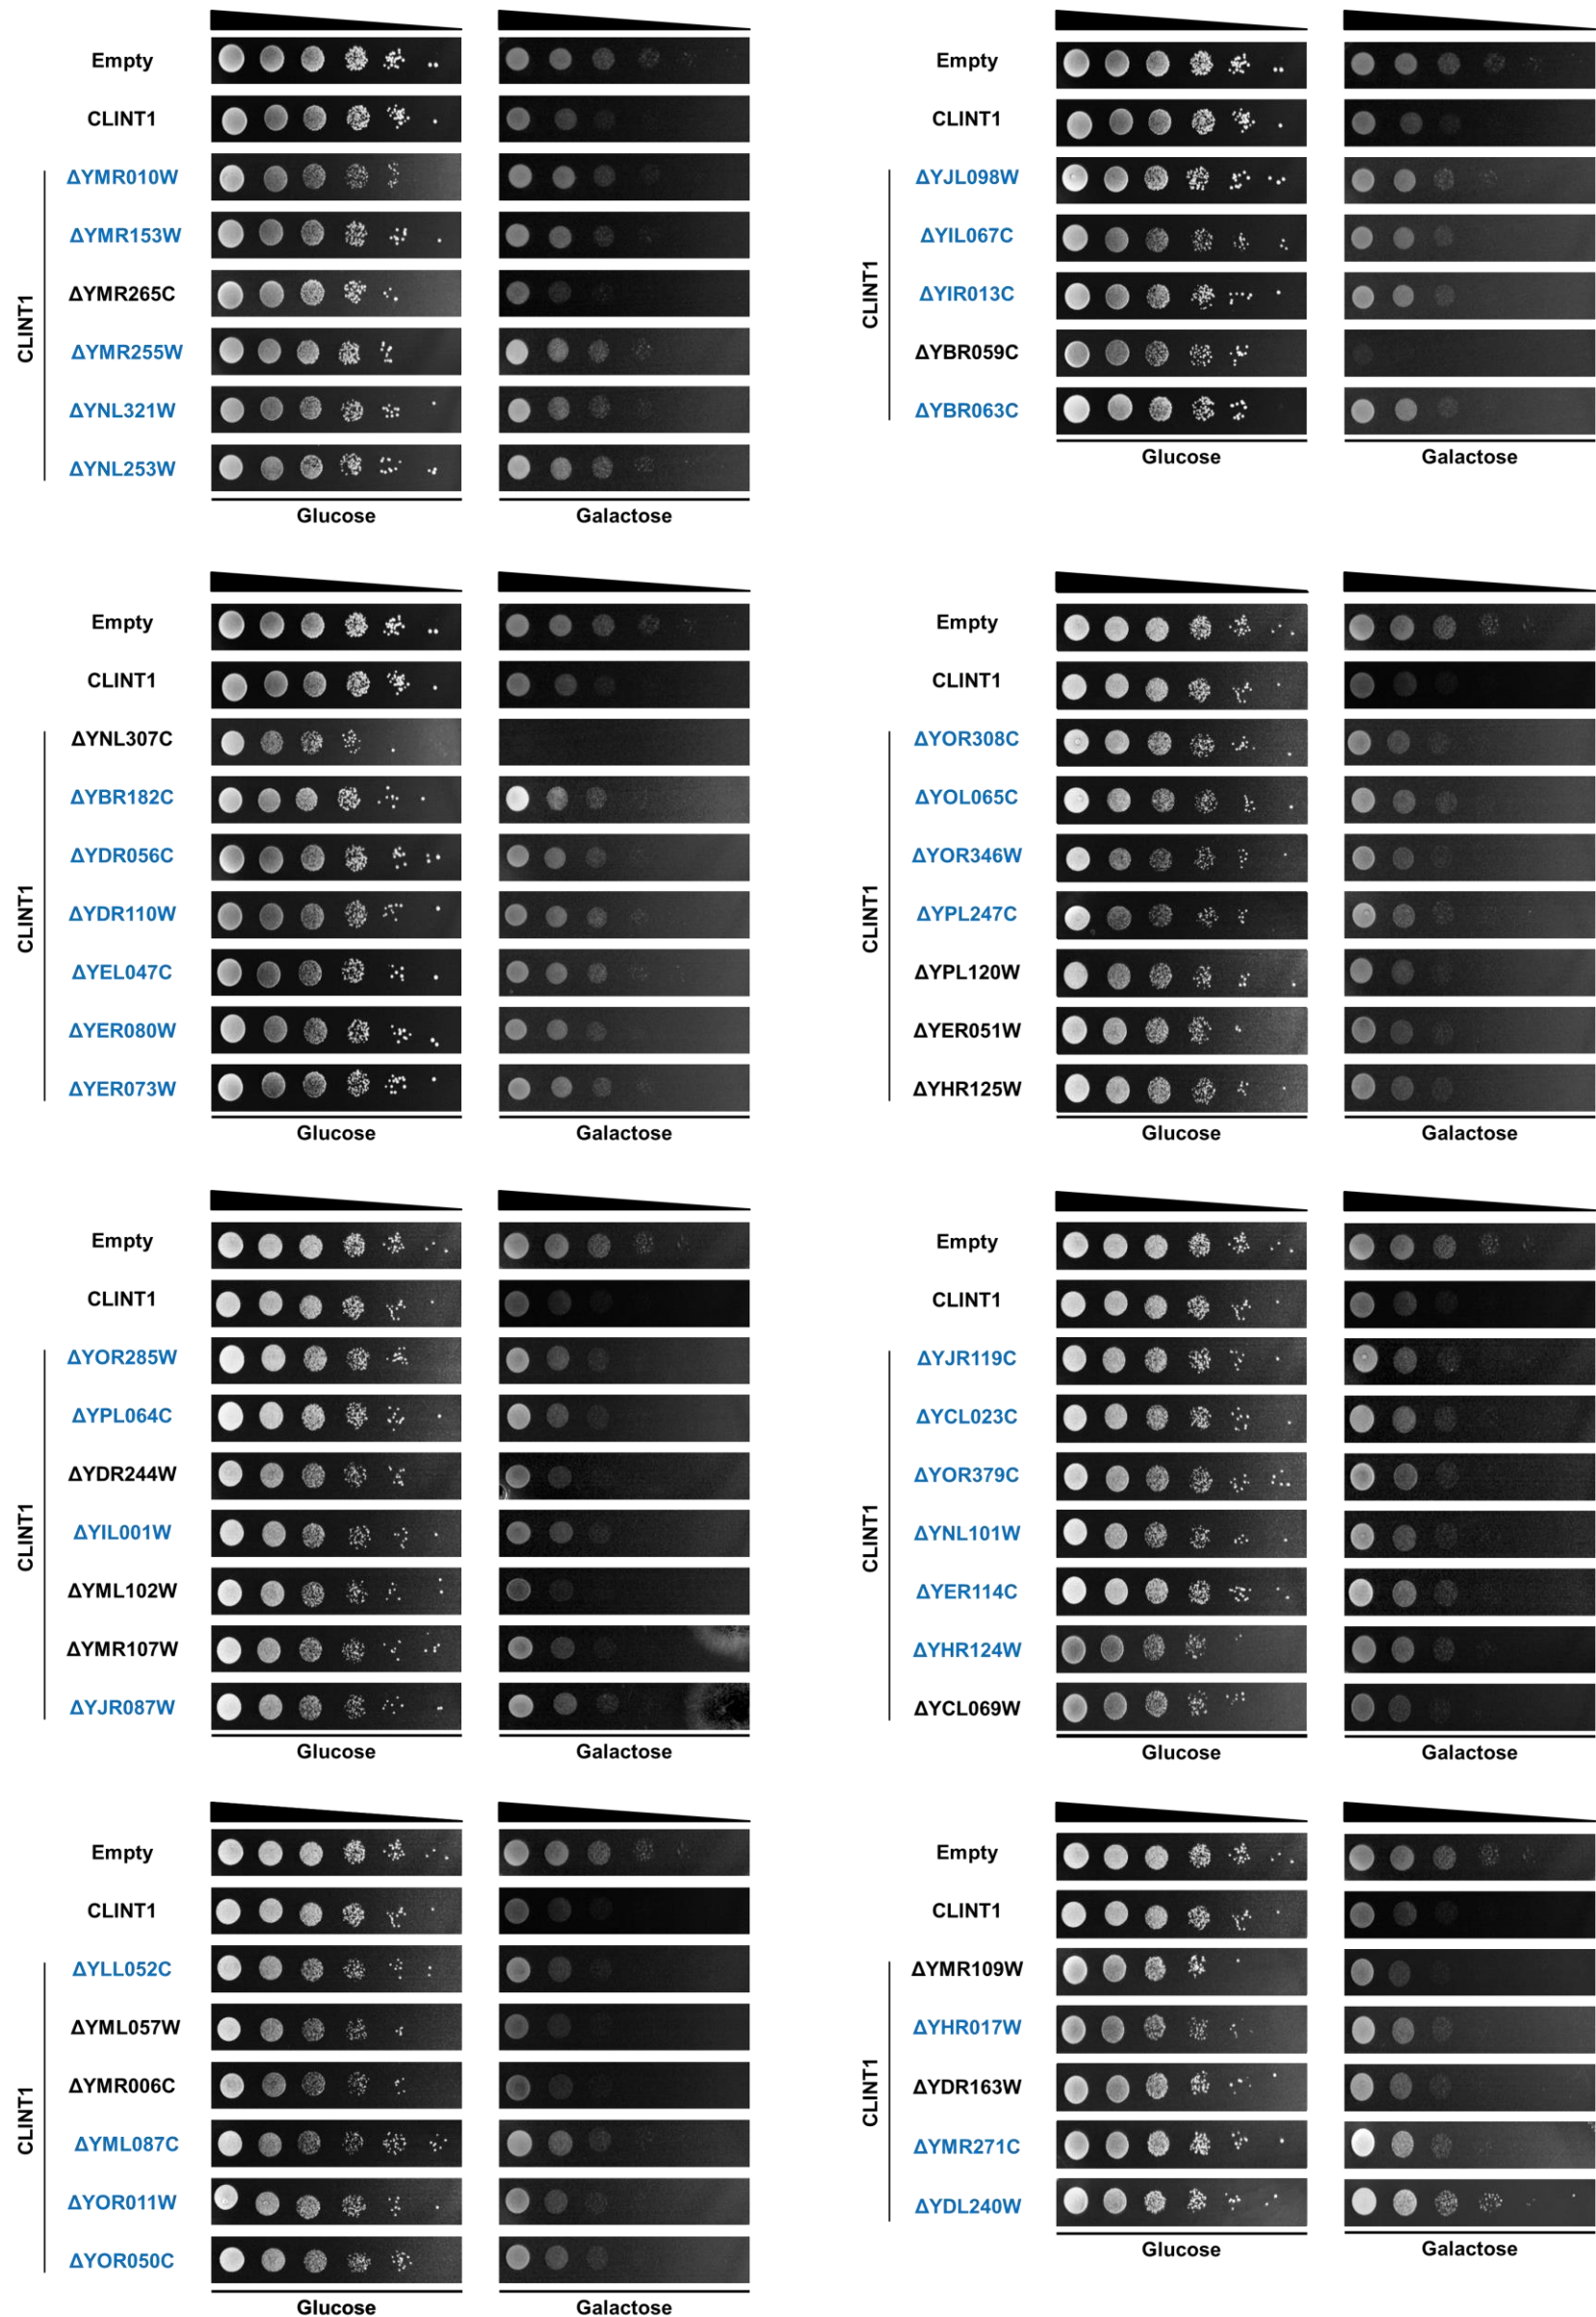



Supplemental Figure 2F

F

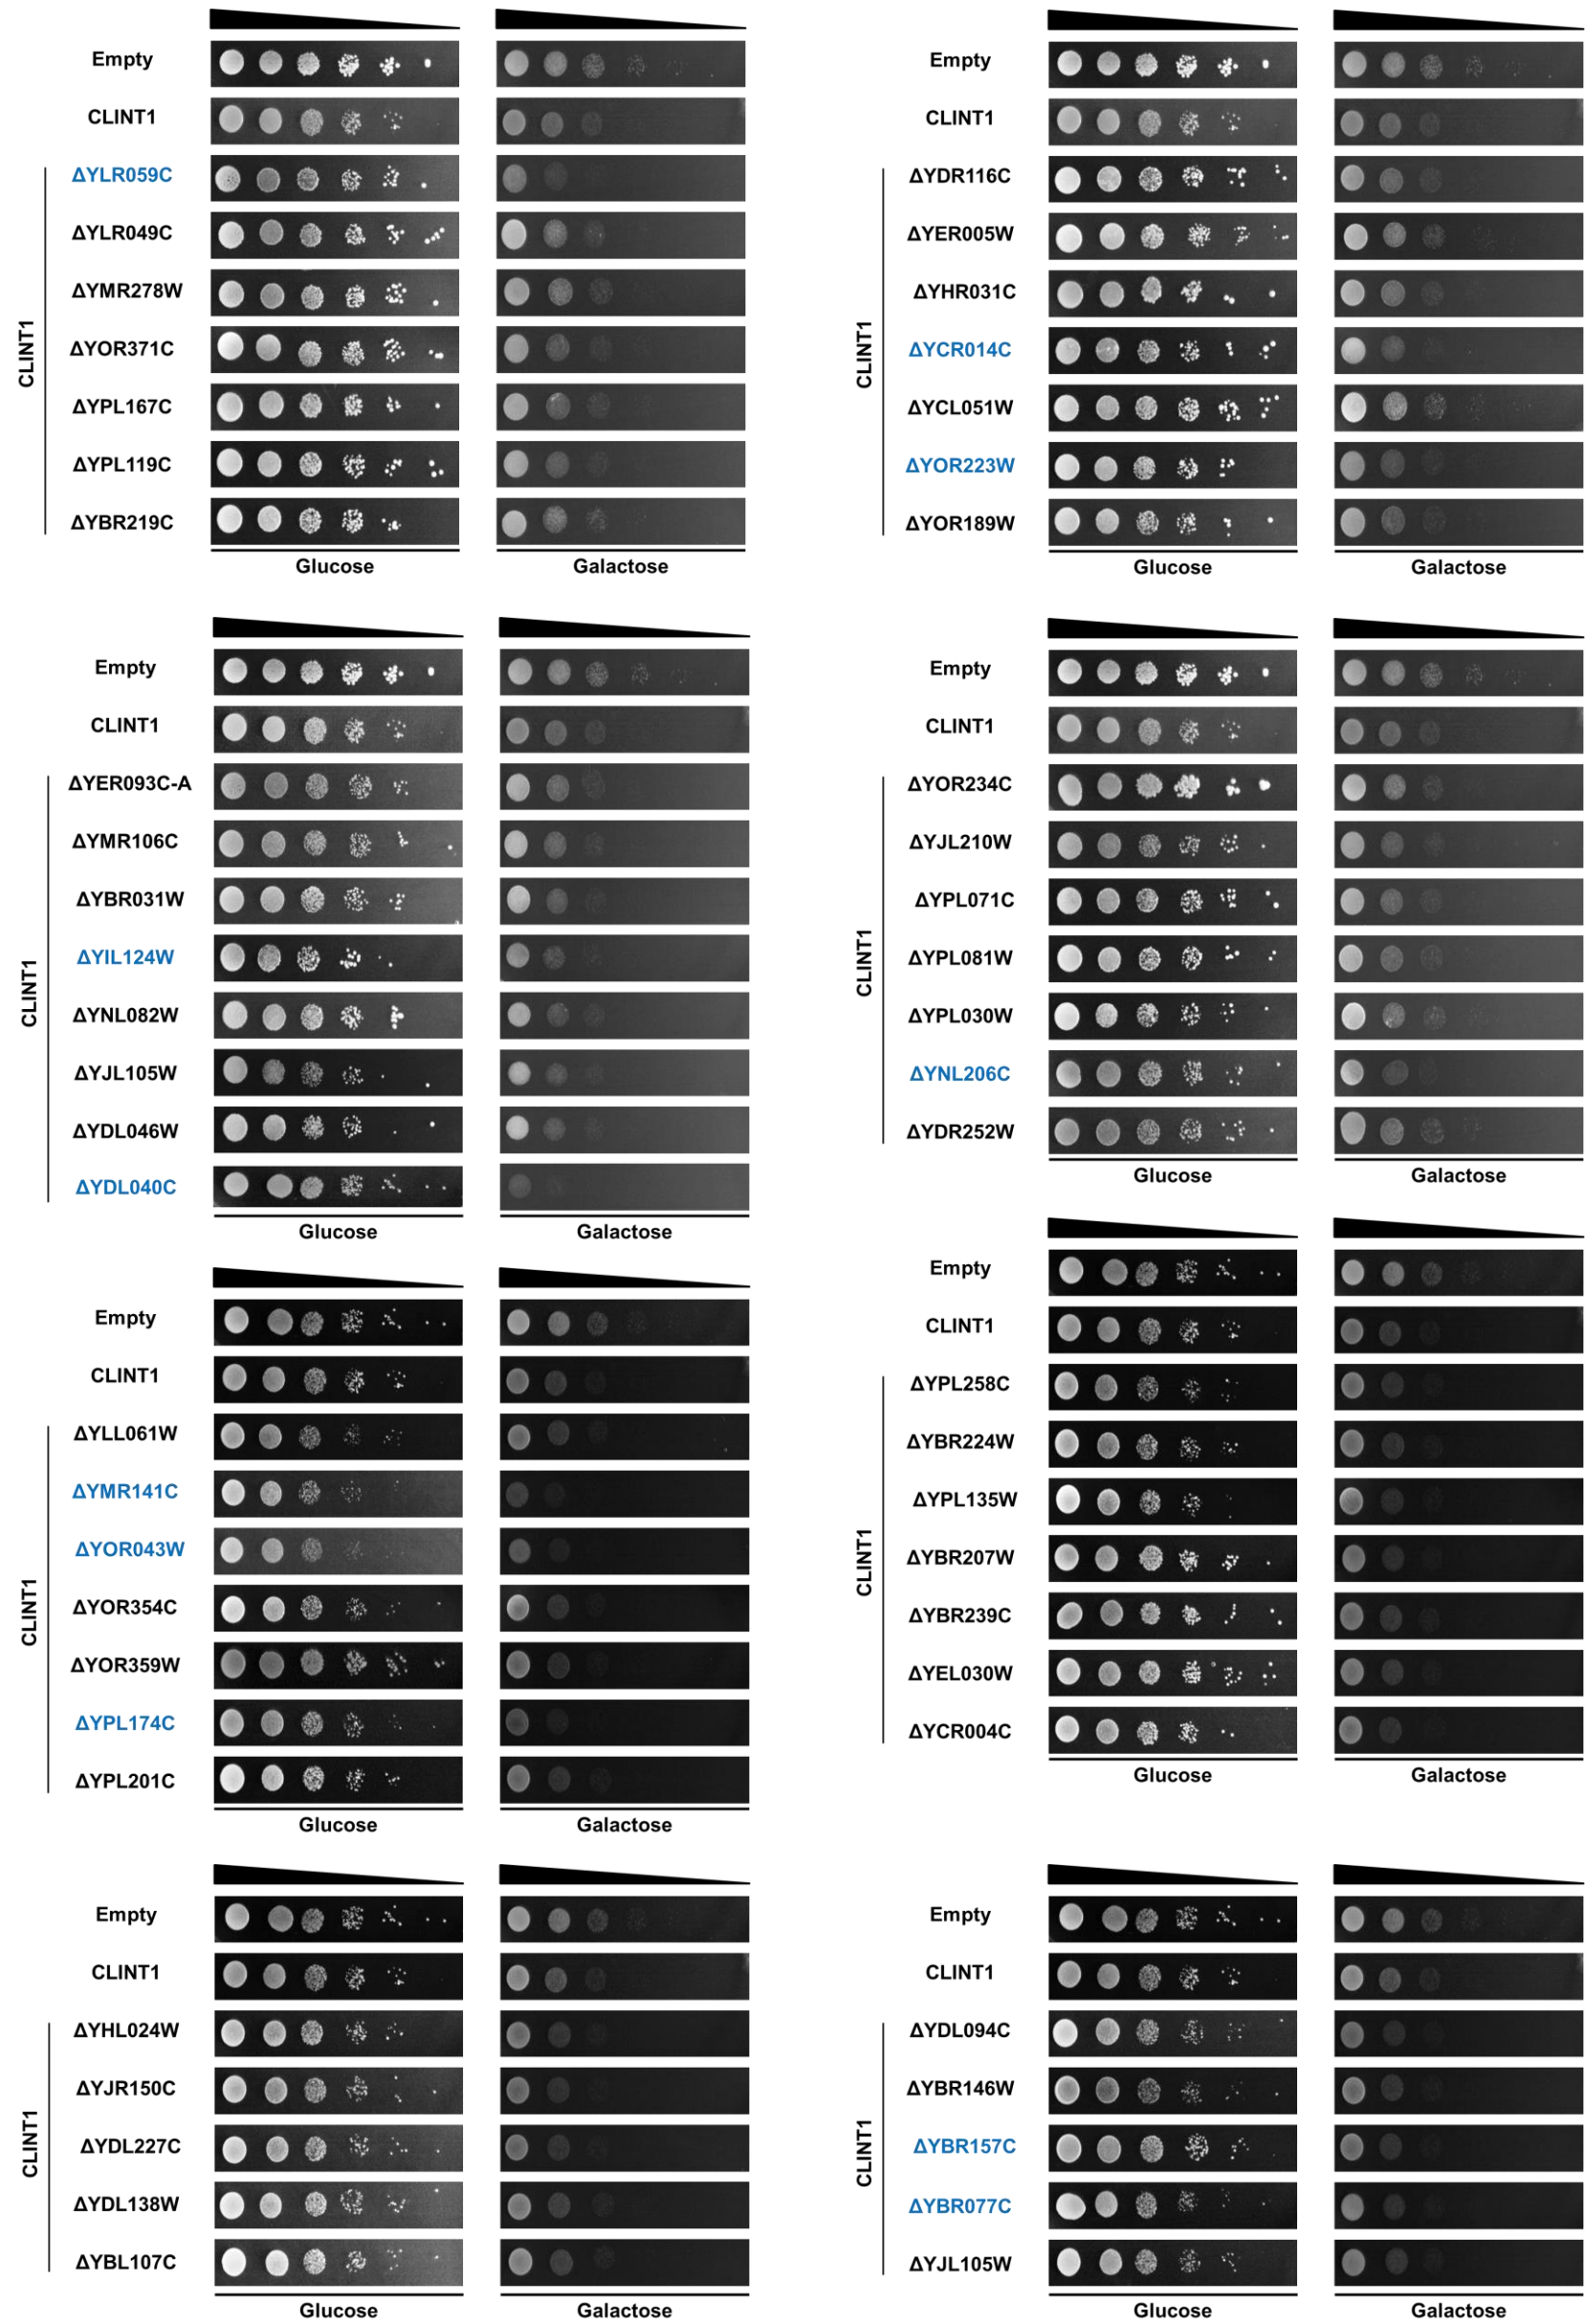

G

| OMIM   | Toxicity suppressors          |             | Toxicity enhancers          |             |
|--------|-------------------------------|-------------|-----------------------------|-------------|
|        | No. suppressor/<br>No. tested | Consistency | No. enhancer/<br>No. tested | Consistency |
| OPTN   | 49/61                         | 80.3%       | 25/67                       | 37.3%       |
| ANG    | 35/43                         | 81.4%       | 8/65                        | 12.3%       |
| CLINT1 | 36/50                         | 72.0%       | 14/59                       | 23.7%       |
