# Supplementary material for: Yeast genetic interaction screen of human genes associated with amyotrophic lateral sclerosis: identification of MAP2K5 kinase as a potential drug target
Source: HighWire-hosted journal article supplement (doi:10.1101/gr.211649.116), 2017-06-08
Supplement: Supplemental_Fig_S3.pdf [file Supplemental_Fig_S3.pdf]

Supplemental Figure 3

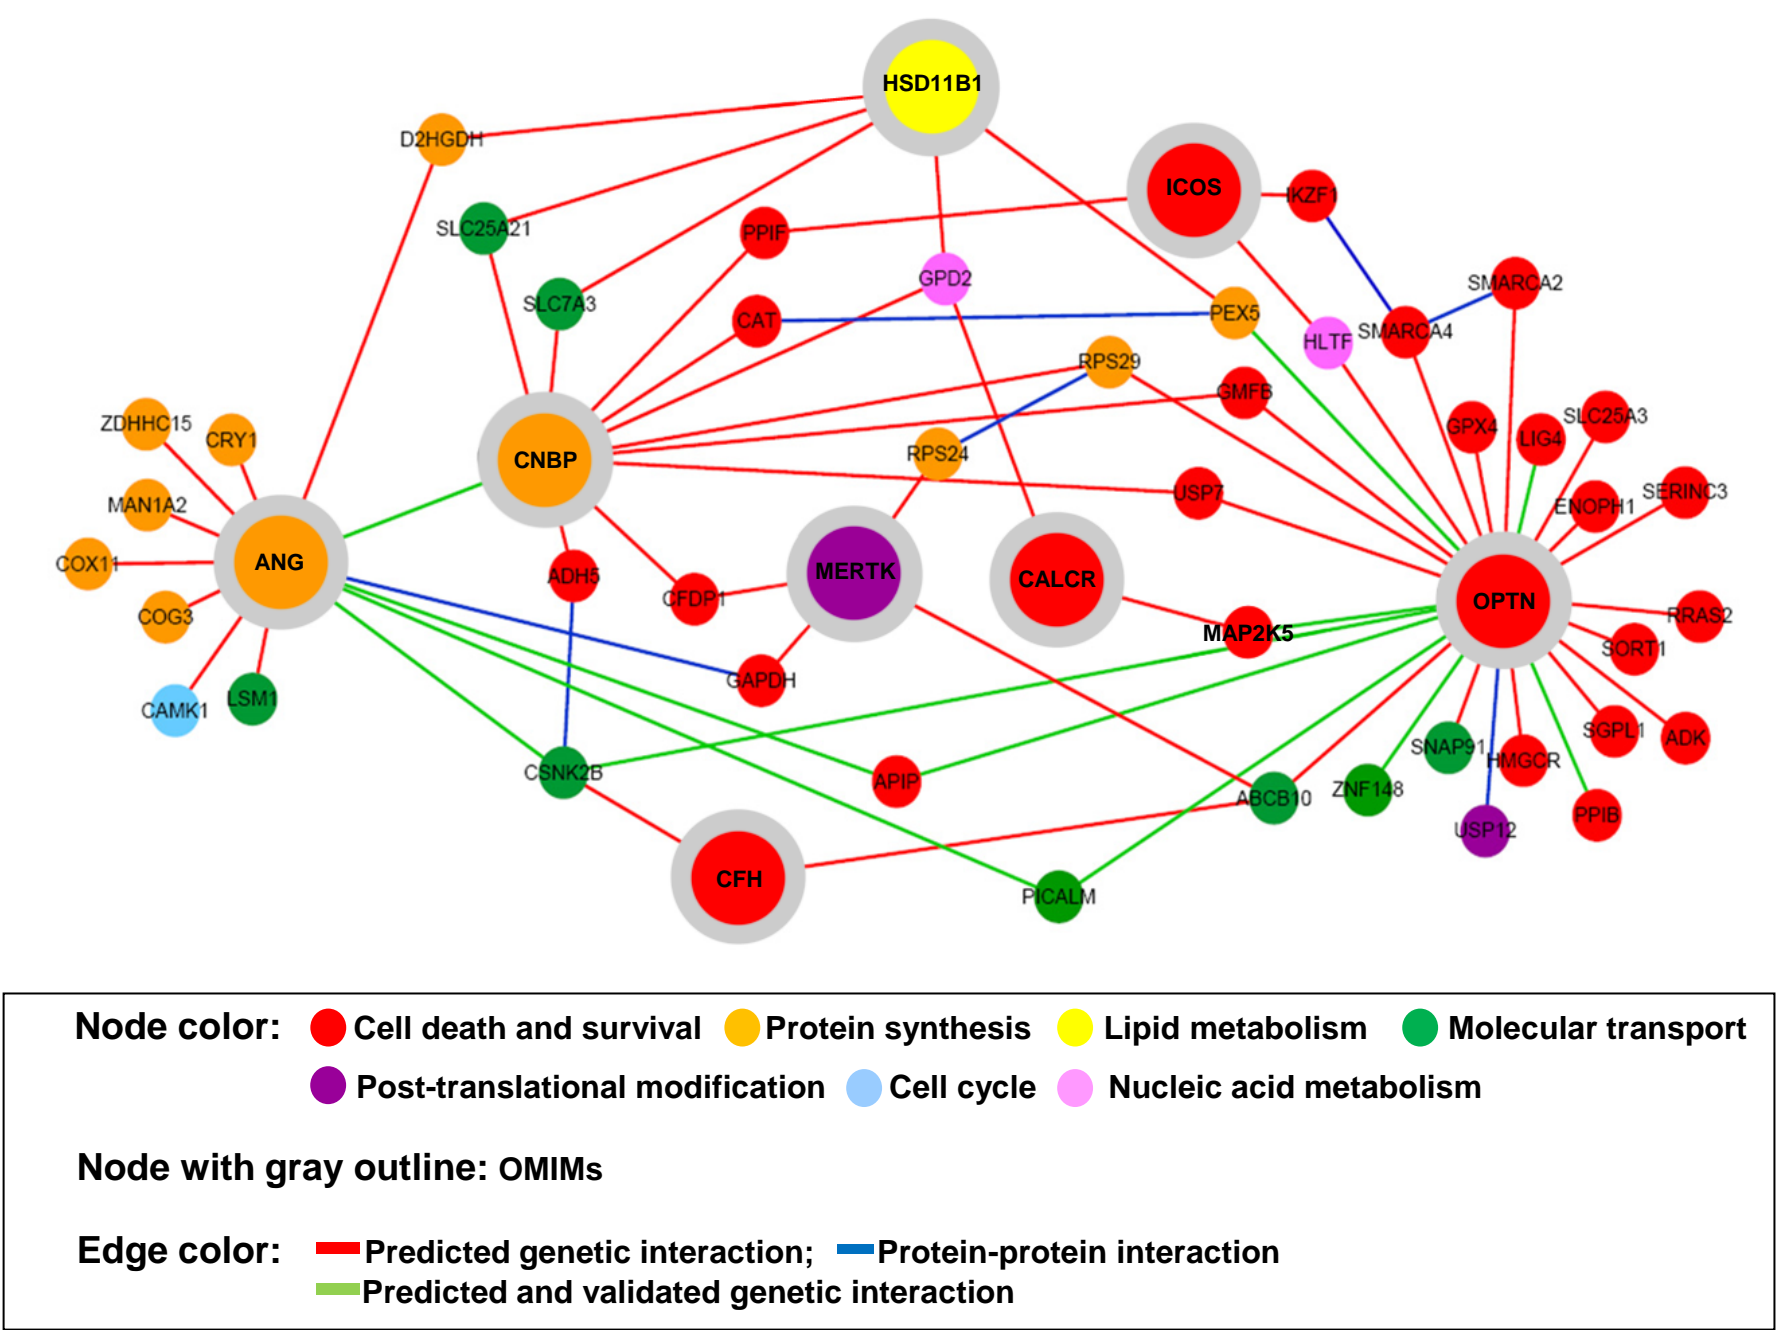

**Supplemental Figure 3. Subnetwork of human-yeast genetic interactions with a focus on OPTN and ANG.** A subnetwork was constructed with OPTN/ANG and their toxicity modifiers with less than five interaction paths.
