# Supplementary material for: Yeast genetic interaction screen of human genes associated with amyotrophic lateral sclerosis: identification of MAP2K5 kinase as a potential drug target
Source: HighWire-hosted journal article supplement (doi:10.1101/gr.211649.116), 2017-06-08
Supplement: Supplemental_Fig_S4.pdf [file Supplemental_Fig_S4.pdf]

Supplemental Figure 4

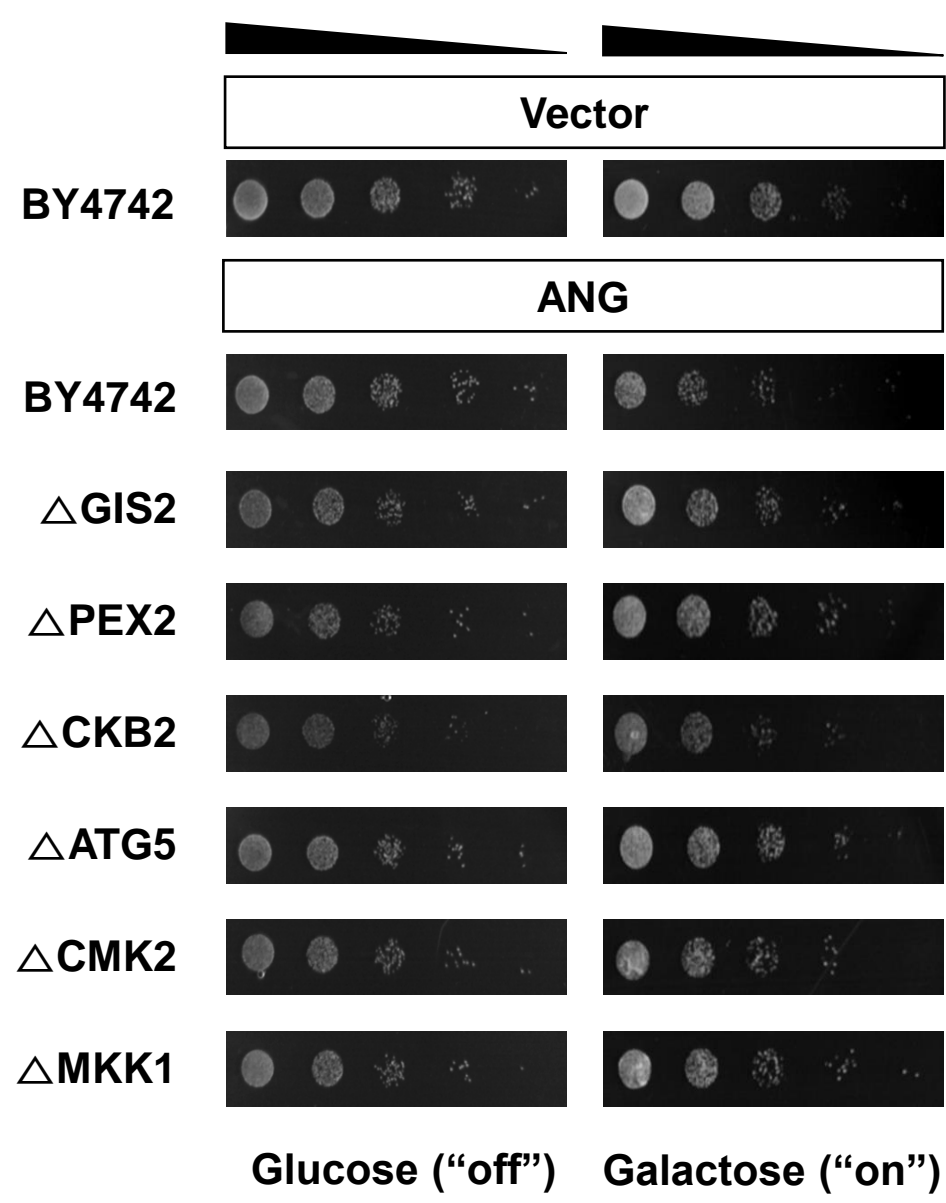

**Supplemental Figure 4. Evaluation of ANG genetic interactions using yeast spotting assay.** ANG toxicity in several yeast deletion strains was assessed by yeast spotting assay.
