# Supplementary material for: Yeast genetic interaction screen of human genes associated with amyotrophic lateral sclerosis: identification of MAP2K5 kinase as a potential drug target
Source: HighWire-hosted journal article supplement (doi:10.1101/gr.211649.116), 2017-06-08
Supplement: Supplemental_Fig_S5.pdf [file Supplemental_Fig_S5.pdf]

# Supplemental Figure 5

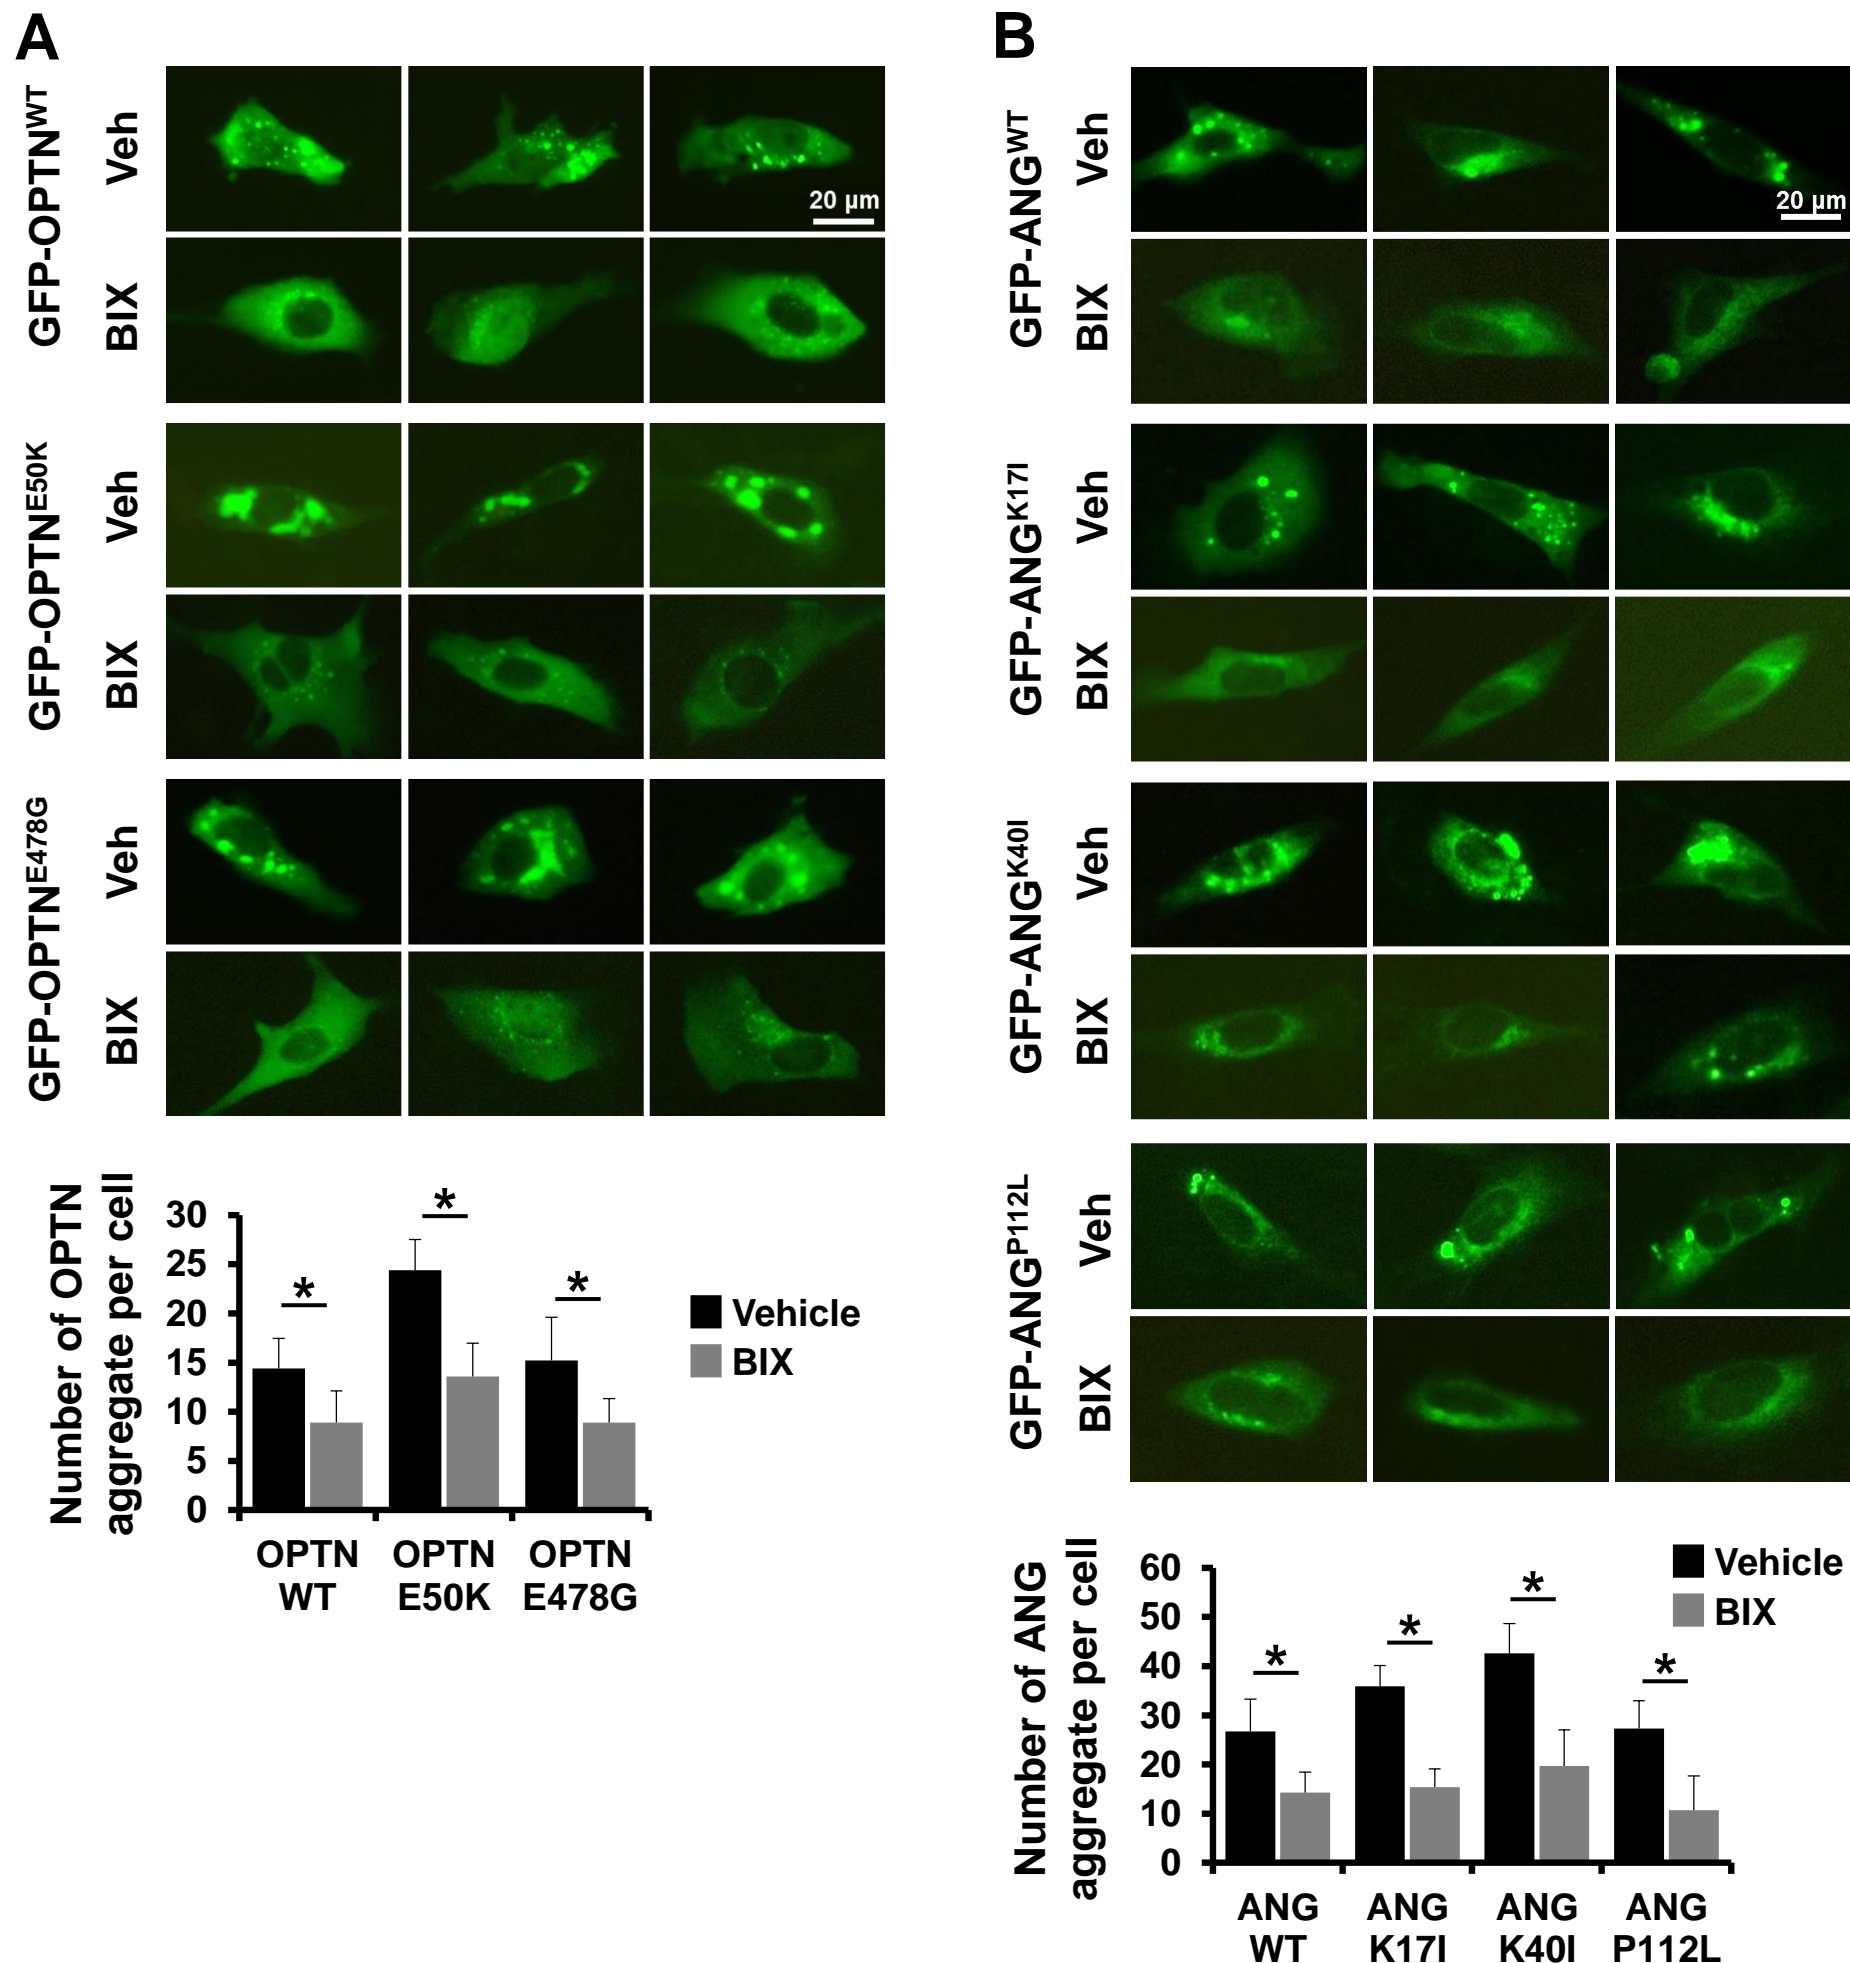

**Supplemental Figure 5. Microscopy images of OPTN and ANG protein aggregates in mammalian cells.** NIH3T3 cells were transiently transfected with wild-type GFP-OPTN or GFP-OPTN mutants (E50K or E478G) (A) and wild-type GFP-ANG or GFP-ANG mutants (K17I, K40I, or P112L) (B). After 36 hr of transient transfection, cells were incubated with vehicle (veh) or 10  $\mu$ M BIX 02189 for 12 hr. Protein aggregates were visualized using fluorescence microscopy and quantified (*lower*). Protein aggregates (puncta ( $>1 \mu$ m)/cell) were counted using ImageJ software (Analyze particles). Results were obtained from at least 10 cells per group. Scale bar, 20  $\mu$ m. \* $p < 0.05$  between the indicated groups; mean  $\pm$  SD.
