# Supplementary material for: Yeast genetic interaction screen of human genes associated with amyotrophic lateral sclerosis: identification of MAP2K5 kinase as a potential drug target
Source: HighWire-hosted journal article supplement (doi:10.1101/gr.211649.116), 2017-06-08
Supplement: Supplemental_Fig_S6.pdf [file Supplemental_Fig_S6.pdf]

## Supplemental Figure 6

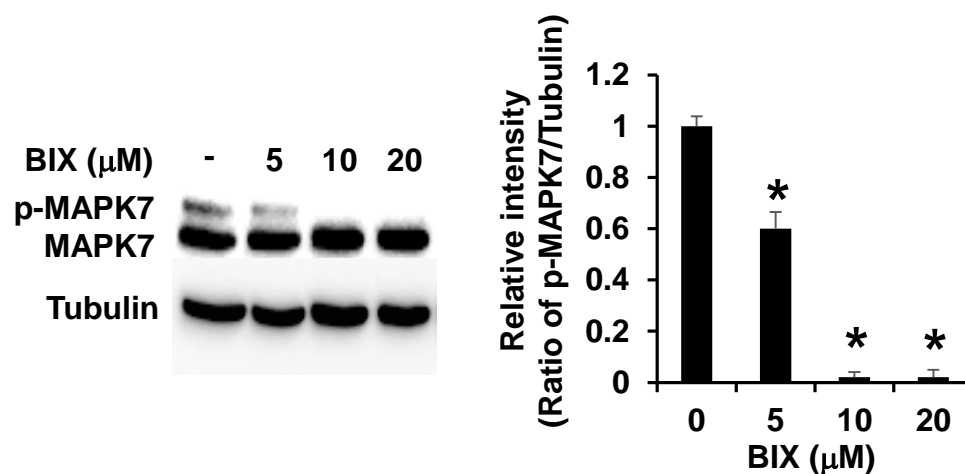

**Supplemental Figure 6. Inhibition of MAPK7 phosphorylation by BIX 02189.** NIH3T3 cells were incubated with increasing concentrations of BIX 02189 (0, 5, 10, 20  $\mu\text{M}$ ) for 2 hr. The cell lysates were harvested, and phosphorylated MAPK7 (p-MAPK7) was detected by western blot analysis. Inhibitor treatment reduced the basal levels of phospho-MAPK7. Tubulin was detected as a loading control. The results are representative of three experiments. The results of densitometric analysis (*right*) are presented as the mean  $\pm$  SD ( $n = 3$ ); \* $p < 0.05$  versus vehicle.
