# Supplementary material for: Yeast genetic interaction screen of human genes associated with amyotrophic lateral sclerosis: identification of MAP2K5 kinase as a potential drug target
Source: HighWire-hosted journal article supplement (doi:10.1101/gr.211649.116), 2017-06-08
Supplement: Supplemental_Fig_S7.pdf [file Supplemental_Fig_S7.pdf]

**Supplemental Figure 7**

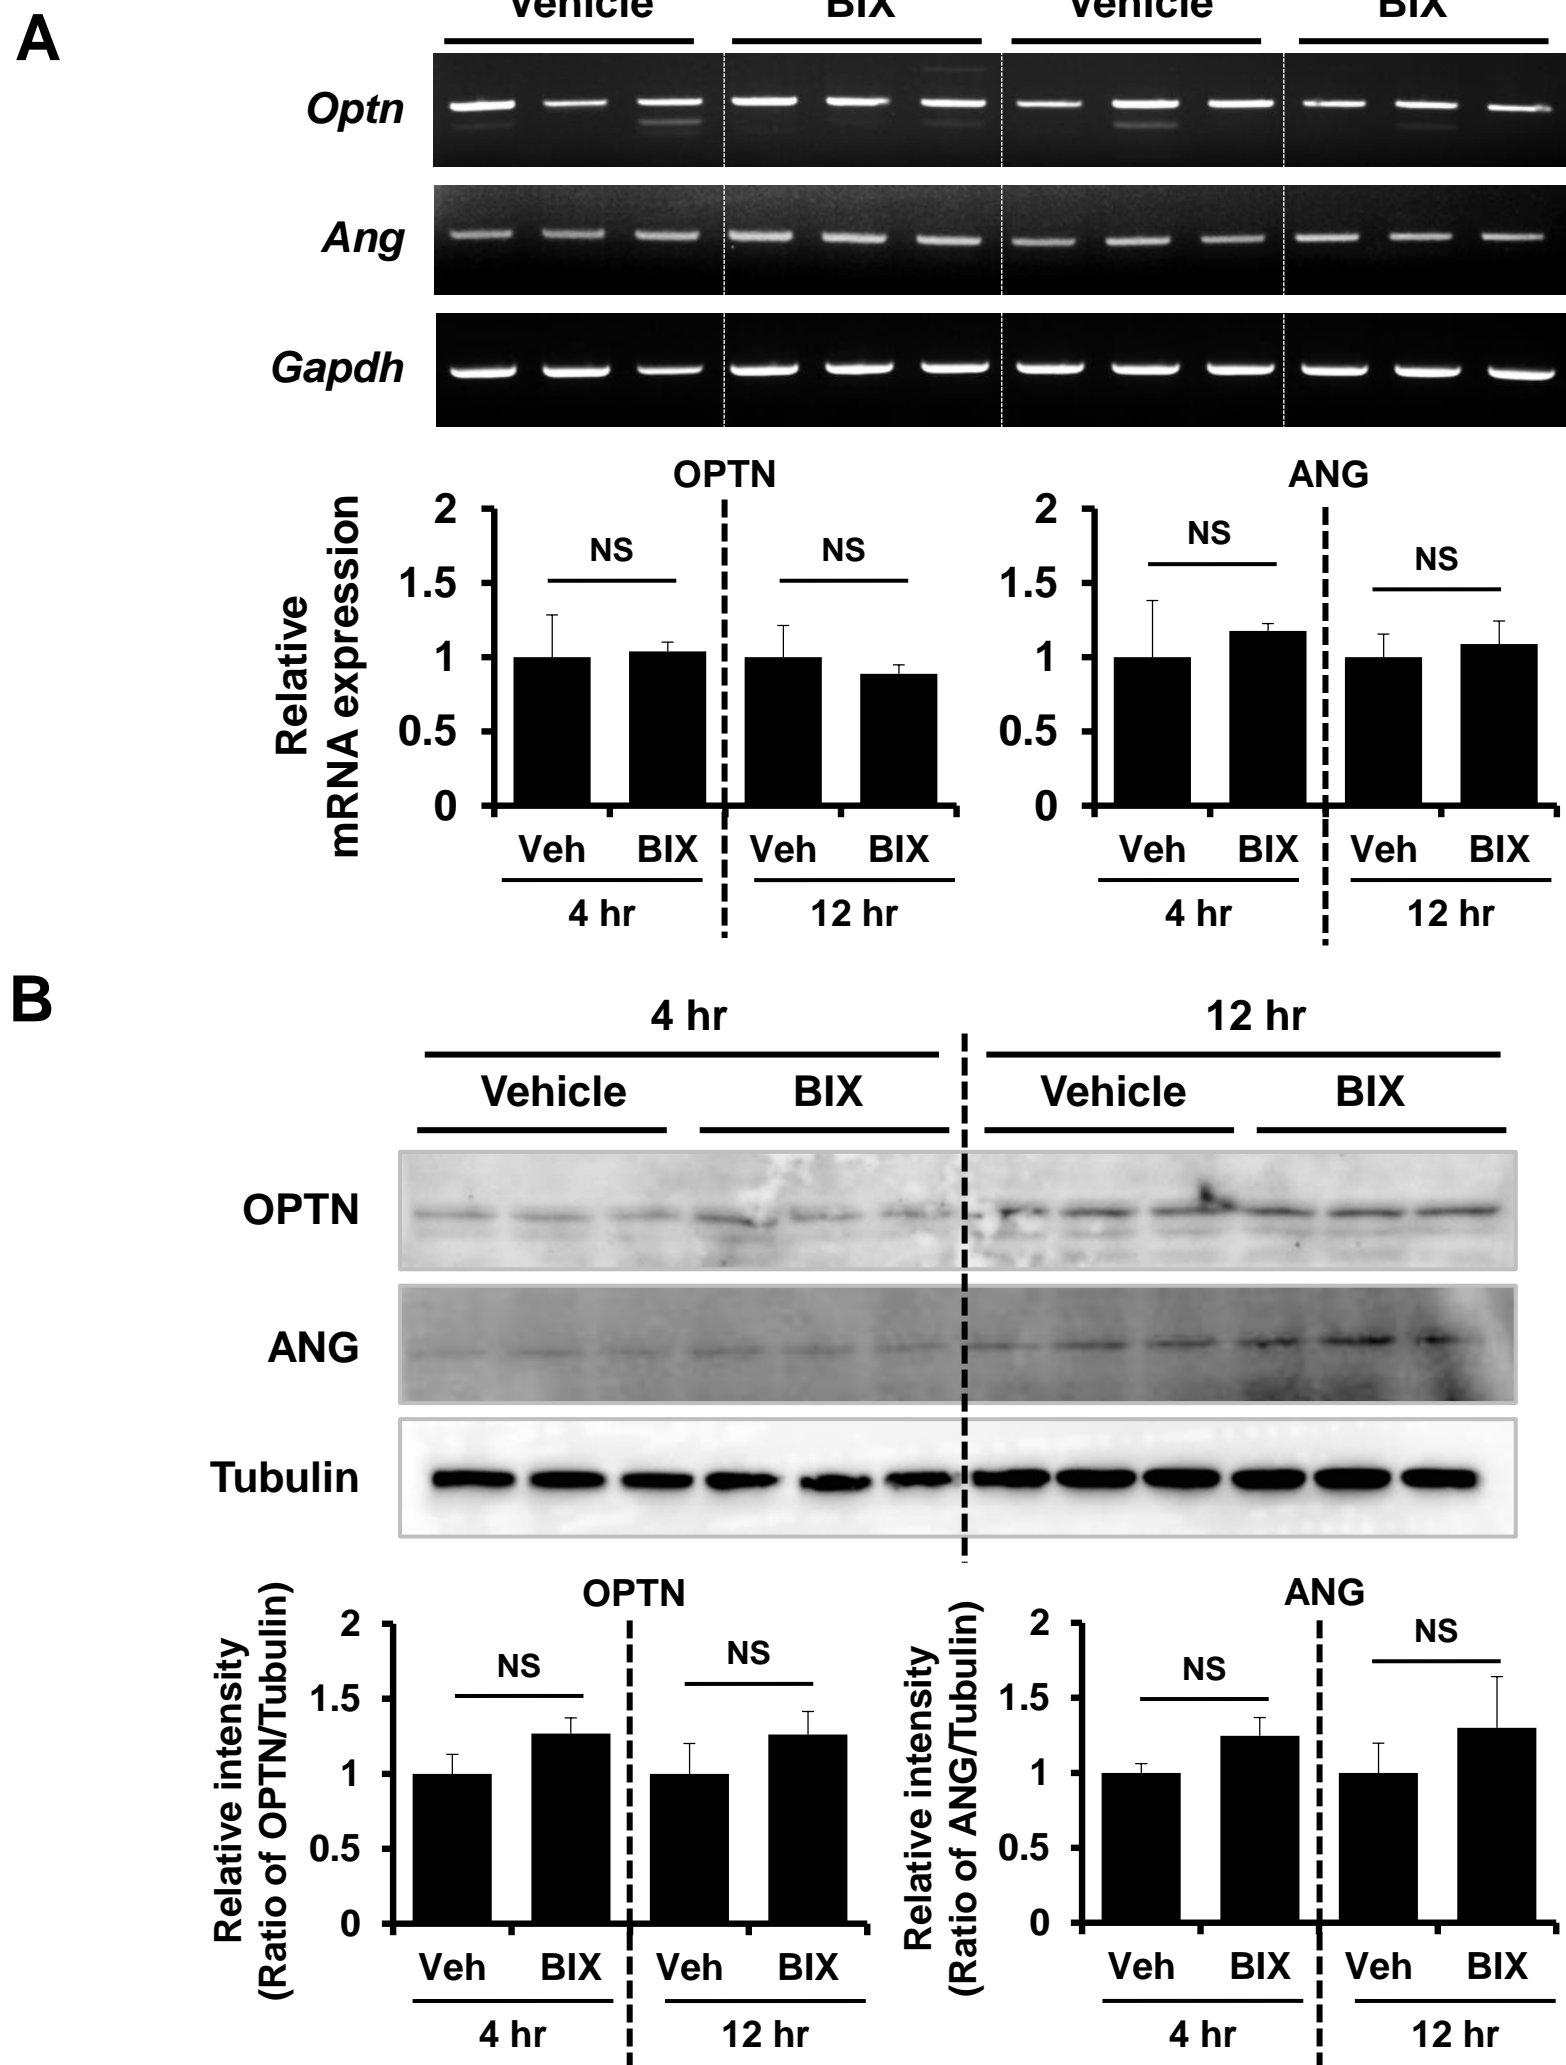

**Supplemental Figure 7. No significant effects of MAP2K5 inhibition on OPTN or ANG levels.** NIH3T3 cells were incubated with vehicle or BIX 02189 (10  $\mu$ M) for 4 or 12 hr. The cell lysates were harvested, and the expression levels of OPTN and ANG mRNA (A) or protein (B) were assessed by RT-PCR (A) or western blot analysis (B), respectively. *Gapdh* and Tubulin were detected as a loading control. N.S. indicates no statistically significant difference (n=3).
