# Supplementary material for: Yeast genetic interaction screen of human genes associated with amyotrophic lateral sclerosis: identification of MAP2K5 kinase as a potential drug target
Source: HighWire-hosted journal article supplement (doi:10.1101/gr.211649.116), 2017-06-08
Supplement: Supplemental_Fig_S8.pdf [file Supplemental_Fig_S8.pdf]

Supplemental Figure 8

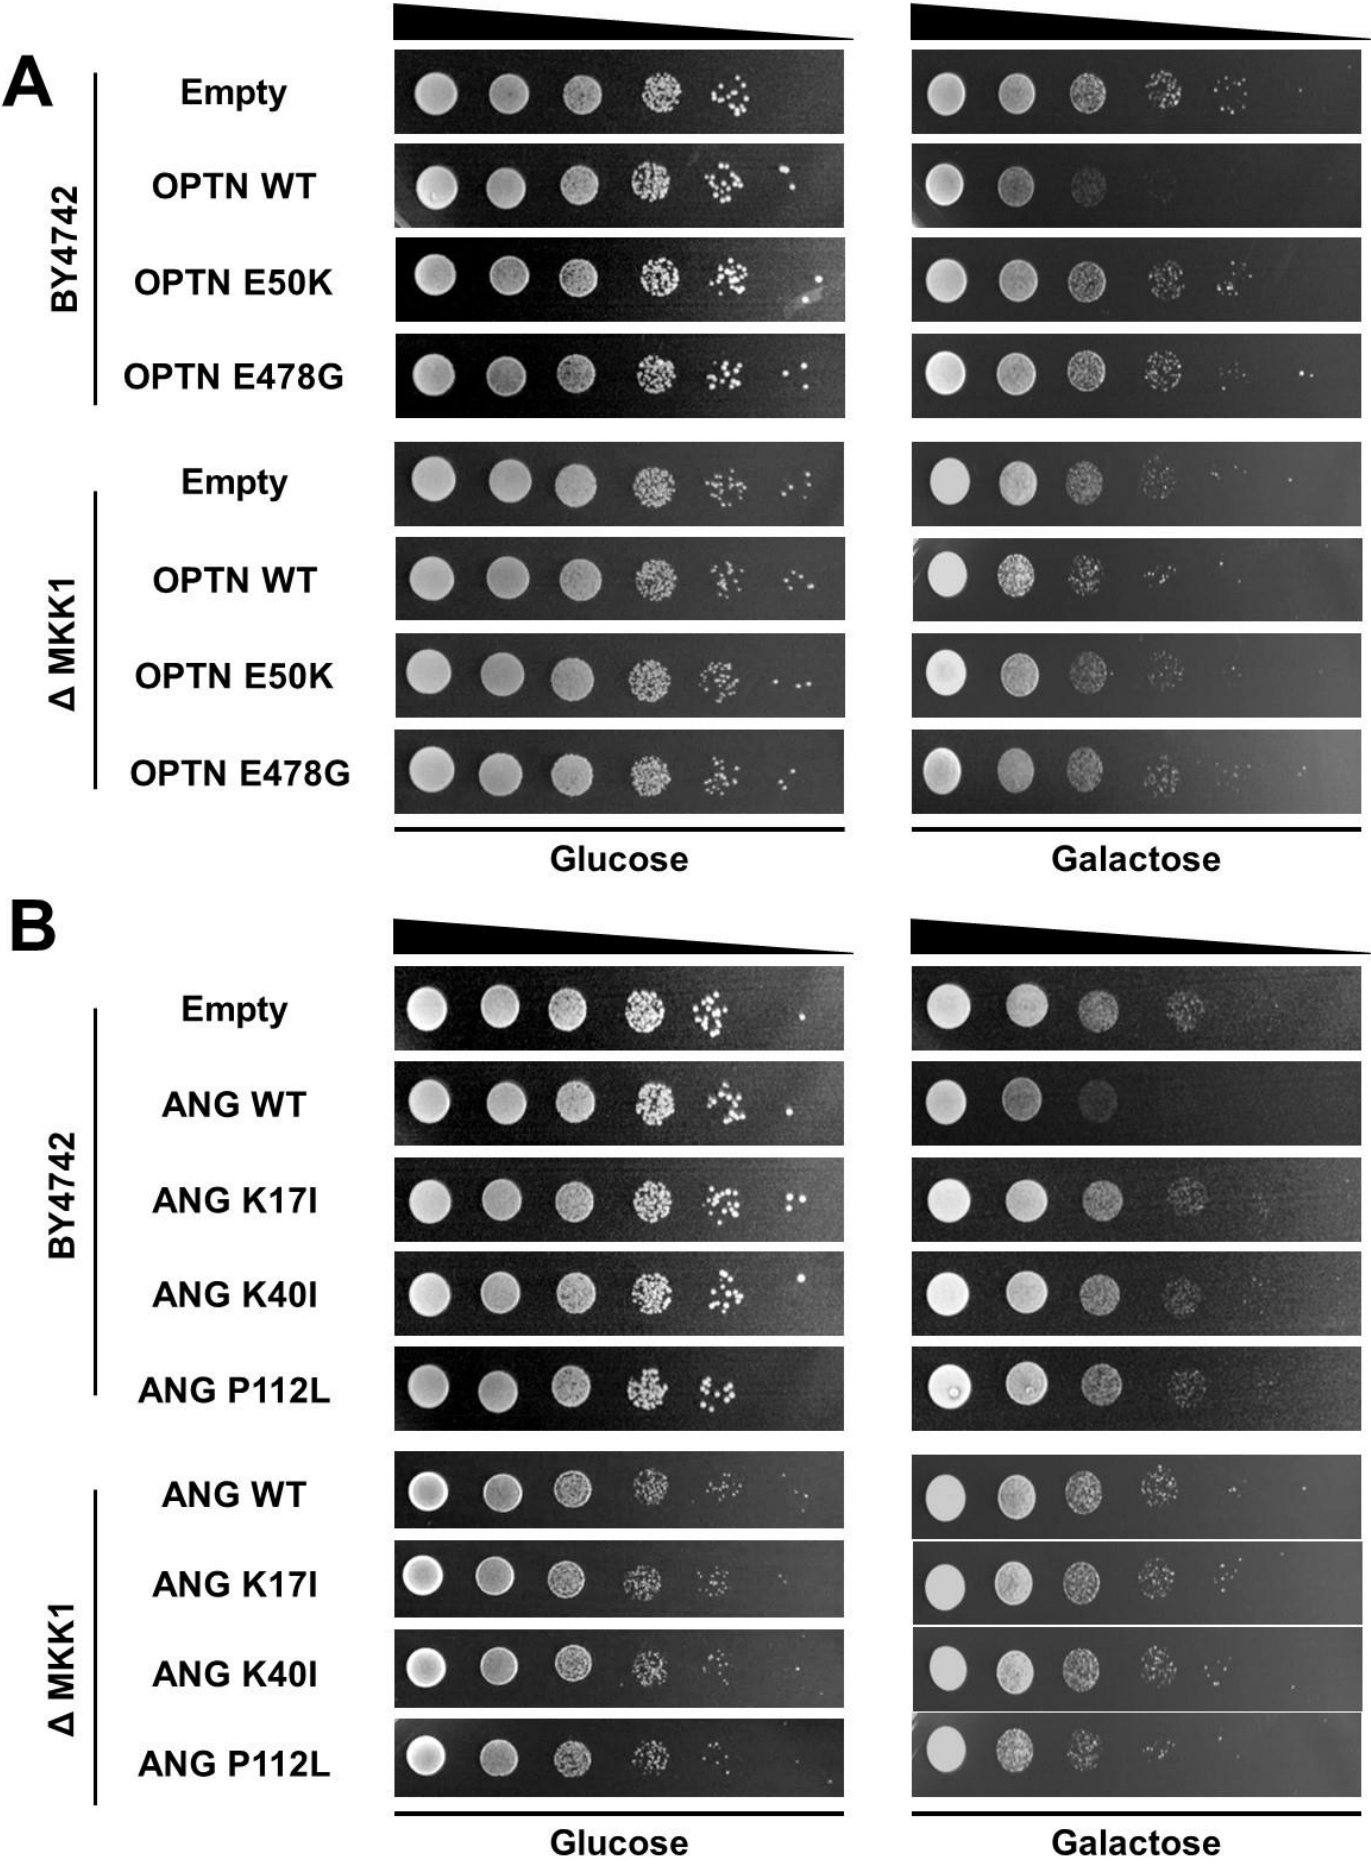

**Supplemental Figure 8. Evaluation of WT/mutant OPTN/ANG genetic interactions in MKK1 deletion strain.** WT and mutant OPTN and ANG toxicity in WT (BY4742) and MKK1 deletion strains was assessed by yeast spotting assay.
