# Supplementary material for: Yeast genetic interaction screen of human genes associated with amyotrophic lateral sclerosis: identification of MAP2K5 kinase as a potential drug target
Source: HighWire-hosted journal article supplement (doi:10.1101/gr.211649.116), 2017-06-08

Supplemental Figure 10

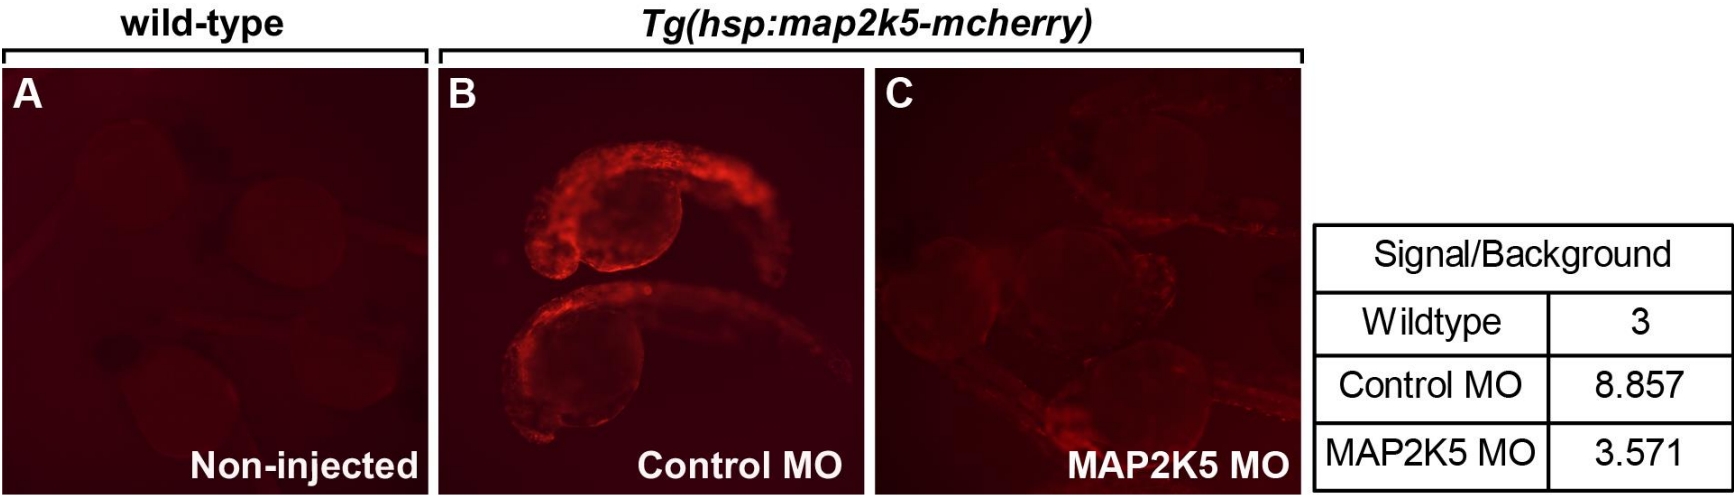

Supplement: Supplemental_Fig_S10.pdf [file Supplemental_Fig_S10.pdf]
