# Supplementary material for: Yeast genetic interaction screen of human genes associated with amyotrophic lateral sclerosis: identification of MAP2K5 kinase as a potential drug target
Source: HighWire-hosted journal article supplement (doi:10.1101/gr.211649.116), 2017-06-08
Supplement: Supplemental_Fig_S11.pdf [file Supplemental_Fig_S11.pdf]

# Supplemental Figure 11

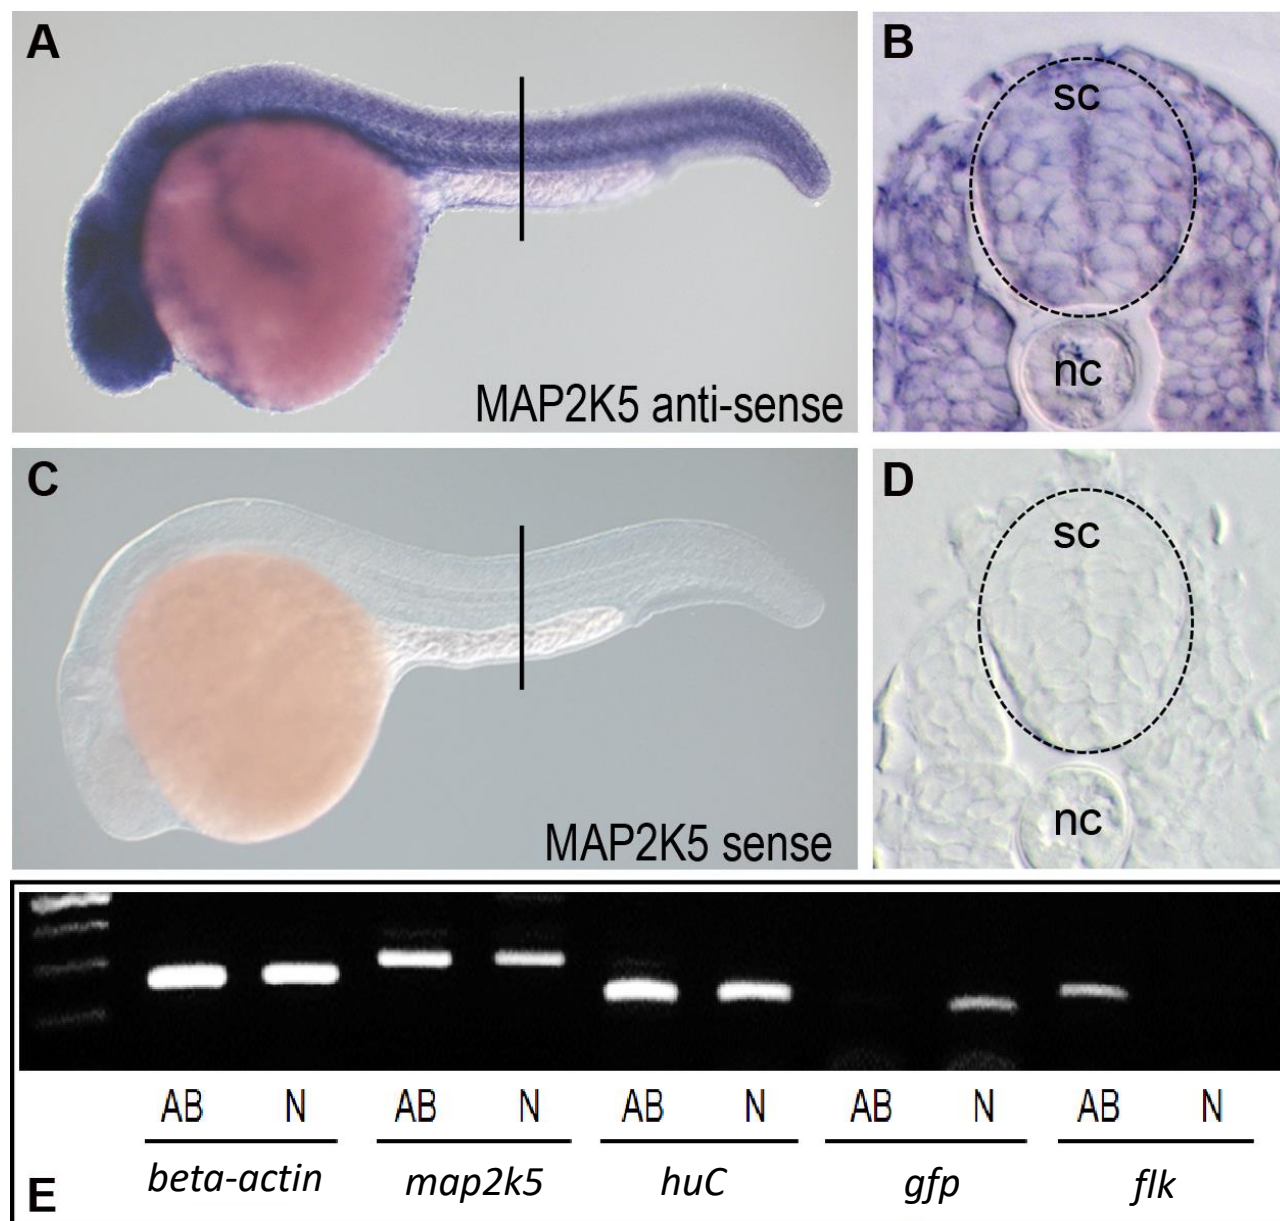

## Supplemental Figure 11. Expression of MAP2K5 in developing zebrafish embryos.

Whole-mount *in situ* RNA hybridization showed that *map2k5* was expressed ubiquitously in whole zebrafish embryos at 24 hr post fertilization (A). *map2k5* expression was also detected in whole spinal cord cells in a transverse section of the spinal cord, presumably including neurons (B), whereas it was not detected with a sense probe for *map2k5* (C, D). Images are lateral views of whole embryos, anterior to the left, dorsal to the top (A, C), or transverse sections through the spinal cord (sc) trunk regions, dorsal to the top (B, D). nc, notochord. To confirm *map2k5* expression in the neuronal population, we used FACS to purify EGFP+ neurons at 2 days post fertilization from dissociated cells of *Tg(huC:egfp)* zebrafish, which express EGFP under the control of the neuron-specific *HuC* promoter. Total RNA was isolated from FACS-sorted EGFP+ neurons, and semi-quantitative RT-PCR was performed with PCR primers specific to *beta-actin*, *map2k5*, *huC*, *gfp*, and *flk* (E). *beta-Actin*, *map2k5*, neuron-specific *huC*, and *gfp*, but not vessel specific *flk*, were successfully amplified from the sorted neurons (N), whereas *beta-actin*, *map2k5*, *huC*, and *flk*, but not *gfp*, were amplified from whole embryos (AB), indicating that the FACS procedure specifically isolated neurons and that *map2k5* was expressed in whole embryos, including neurons.
