# Supplementary material for: Yeast genetic interaction screen of human genes associated with amyotrophic lateral sclerosis: identification of MAP2K5 kinase as a potential drug target
Source: HighWire-hosted journal article supplement (doi:10.1101/gr.211649.116), 2017-06-08
Supplement: Supplemental_Fig_S13.pdf [file Supplemental_Fig_S13.pdf]

# Supplemental Figure 13

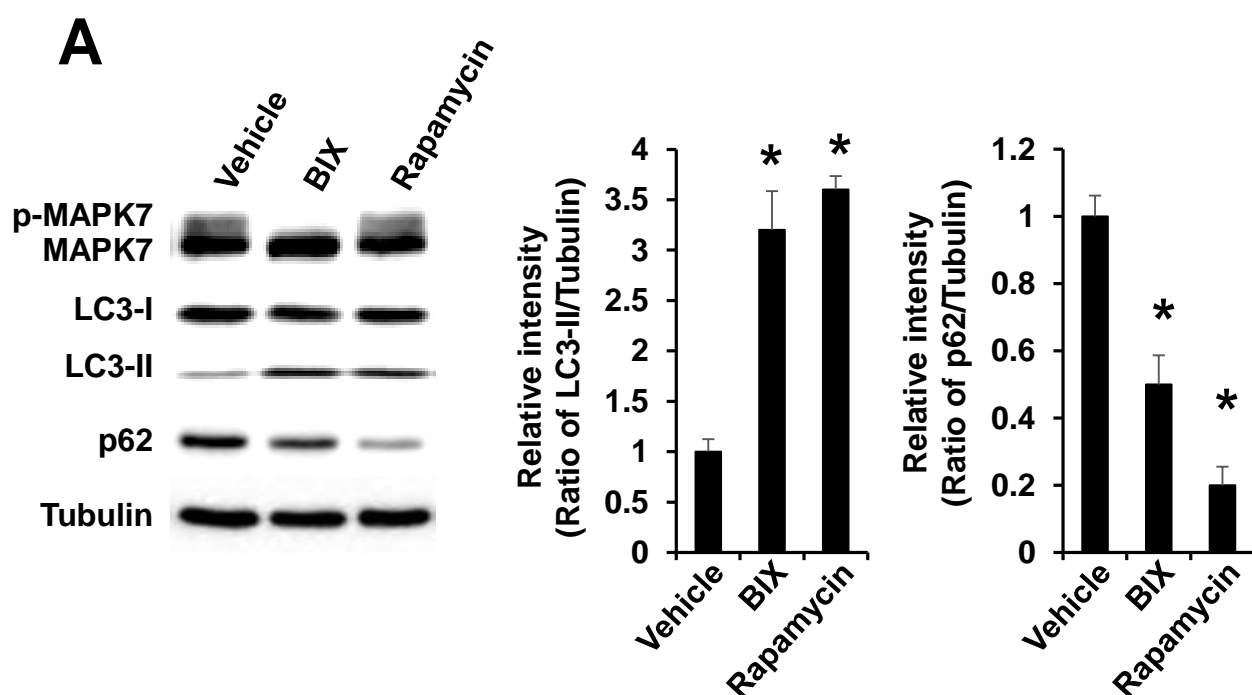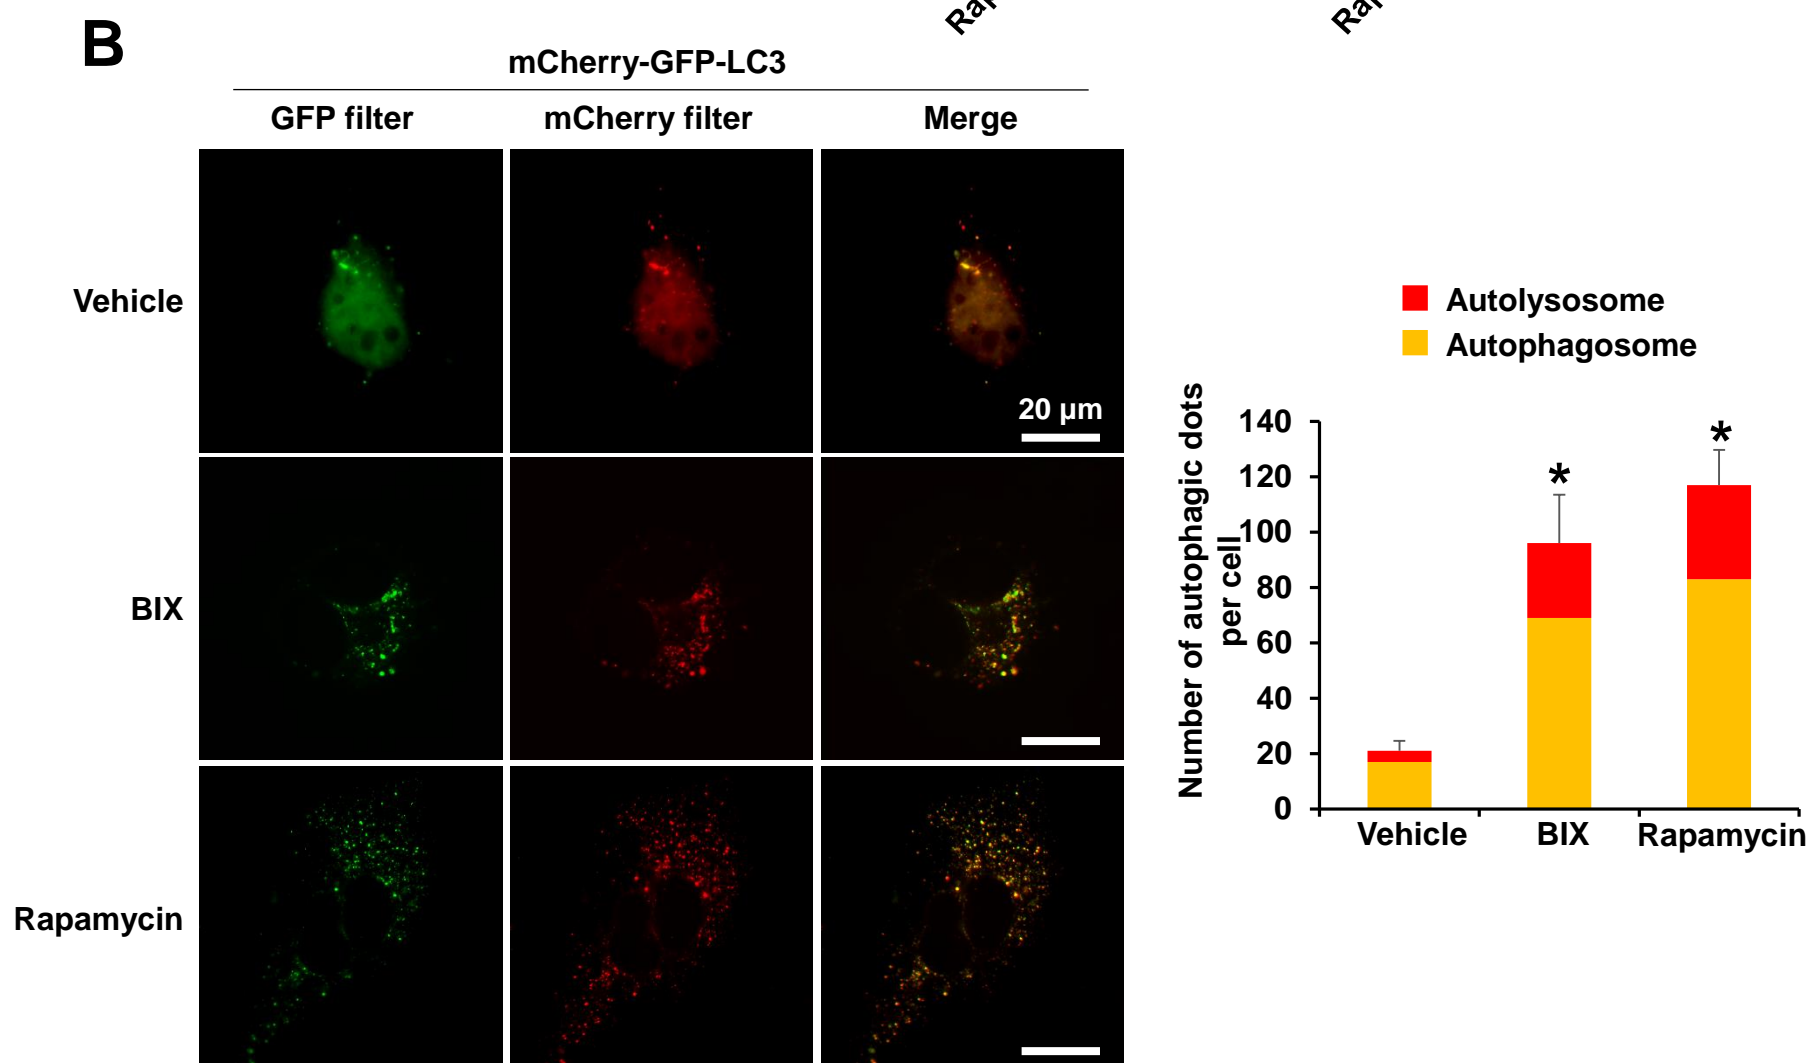

**Supplemental Figure 13. Inhibition of MAP2K5 enhances autophagy.** (A) NIH3T3 cells were treated for 4 hr with 10  $\mu$ M of BIX 02189 or 200 nM of rapamycin, an autophagy inducer. Protein lysates were subjected to western blot analysis with MAPK7, LC3, and p62 antibodies. Tubulin was detected as a loading control. The results of densitometric analysis (*right*) are presented as the mean  $\pm$  SD ( $n = 3$ ); \* $p < 0.05$  versus vehicle treatment. (B) NIH3T3 cells plated on coverslips were transfected with mCherry-GFP-LC3. After 48 hr of transfection, cells were treated with 10  $\mu$ M of BIX 02189 or 200 nM of rapamycin for 4 hr. Images show representative fields with autophagosomes (yellow) and autolysosomes (red) (*left*). Scale bar, 20  $\mu$ m. The graph shows the number of autophagosomes (yellow bar) and autolysosomes (red bar) per cell in the merged images (*right*). Thirty cells were examined from three independent experiments. \* $p < 0.05$  versus vehicle.
