# Supplementary material for: Yeast genetic interaction screen of human genes associated with amyotrophic lateral sclerosis: identification of MAP2K5 kinase as a potential drug target
Source: HighWire-hosted journal article supplement (doi:10.1101/gr.211649.116), 2017-06-08
Supplement: Supplemental_Fig_S15.pdf [file Supplemental_Fig_S15.pdf]

## Supplemental Figure 15

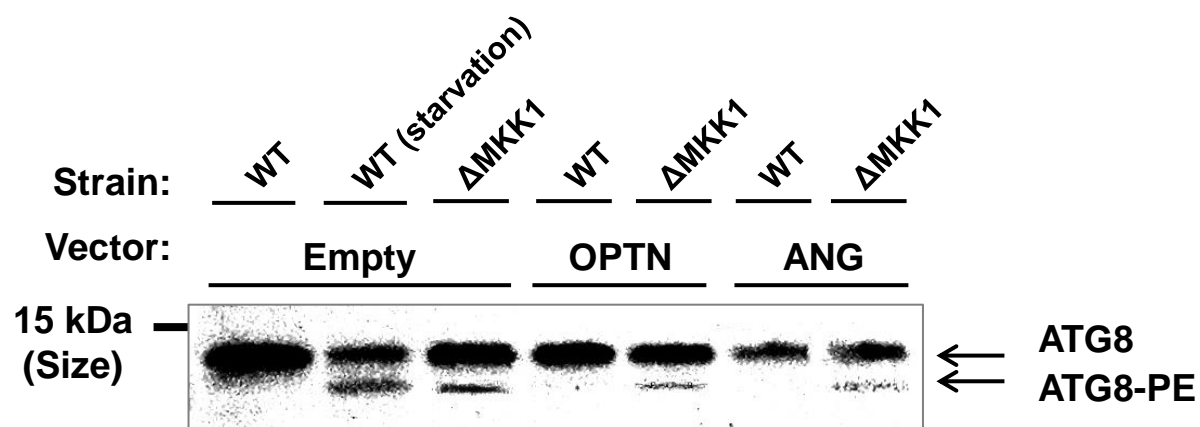

**Supplemental Figure 15. MAP2K5 deletion enhances autophagy in yeast.** Wild-type yeast strain (BY4742) or MAP2K5 deletion strain ( $\Delta$ MKK1) was transformed with OPTN or ANG constructs, and then grown to a  $OD_{600}$  of 1 in SGal-Leu medium and harvested. For starvation, yeast cells were incubated in SD-N medium for 6 hr. ATG8 lipidation were detected by western blot analysis using an antibody against ATG8. ATG8-PE (phosphatidylethanolamine) was separated from ATG8 by 13.5% SDS PAGE gels containing 6 M urea.
